# Supplementary material
Source: PubMed Central journal article supplement (PMC11701196)
Supplement: DOM-27-866-s002.pdf [file DOM-27-866-s002.pdf]

## Supplementary Tables

**Table S1.** Dataset description

**Table S2.** Association of type 2 diabetes with ten gastrointestinal diseases.

**Table S3.** Association of type 2 diabetes with deCODE plasma protein.

**Table S4.** Association of type 2 diabetes with UKB-PPP plasma protein.

**Table S5.** Association of type 2 diabetes with Fenland plasma protein.

**Table S6.** Association of putative type 2 diabetes-associated proteins in deCODE with gastrointestinal diseases.

**Table S7.** Association of putative type 2 diabetes-associated proteins in UKB-PPP with gastrointestinal diseases.

**Table S8.** Association of putative type 2 diabetes-associated proteins in Fenland with gastrointestinal diseases.

**Table S9.** Colocalization analysis of identified protein-gastrointestinal pairs in deCODE, UKB-PPP, and Fenland.

**Table S10.** Mediation analysis of identified protein between type 2 diabetes and gastrointestinal diseases in deCODE, UKB-PPP, and Fenland.

**Table S11.** Appraisal of druggability.

**Table S1.** Dataset description.

| Phenotype                                     | Consortium/First author                                          | Participants                         | ICD-8 code                      | ICD-9 code                        | ICD-10 code                                                          | Adjustments                                                                                                                               | Web source/Pubmed ID                                                                           |
|-----------------------------------------------|------------------------------------------------------------------|--------------------------------------|---------------------------------|-----------------------------------|----------------------------------------------------------------------|-------------------------------------------------------------------------------------------------------------------------------------------|------------------------------------------------------------------------------------------------|
| Type 2 diabetes (One-unit in log-transformed) | Vujkovic M et al. (2020)                                         | 148,726 cases, 965,732 controls      |                                 |                                   |                                                                      | Age, sex, and the first 10 genetic principal components                                                                                   | 32541925                                                                                       |
| Circulating protein level                     | deCODE/Ferkingstad et al. (2021)                                 | 35,559 Icelanders                    |                                 |                                   |                                                                      | Age, sex, and sample age                                                                                                                  | 34857953                                                                                       |
|                                               | UKB-PPP (UK Biobank Pharma Proteomics Project)/Sun et al. (2023) | 54,219 European-ancestry individuals |                                 |                                   |                                                                      | Age, sex, batch, UKB center, UKB genetic array, time between blood sampling and measurement and the first 20 genetic principal components | 37794186                                                                                       |
|                                               | Fenland/Pietzner et al. (2021)                                   | 10,708 European-ancestry individuals |                                 |                                   |                                                                      | Age, sex, and the first ten genetic principal components and test site                                                                    | 34819519                                                                                       |
| Gastroesophageal reflux disease               | FinnGen                                                          | 26,184 cases, 320,387 controls       |                                 | 5301A                             | K21                                                                  | Sex, age, genotyping batch and the first ten genetic principal components                                                                 | FinnGen <a href="https://www.finnngen.fi/fi">https://www.finnngen.fi/fi</a>                    |
|                                               | UK Biobank                                                       | 14,223 cases, 369,275 controls       |                                 |                                   | K21, K21.9                                                           | Sex, birth year, genotyping batch and first four principal components                                                                     | UK Biobank <a href="https://www.leelabsg.org/resources">https://www.leelabsg.org/resources</a> |
| Gastric ulcer                                 | FinnGen                                                          | 1,307 cases, 287,137 controls        |                                 | 531                               | K25                                                                  | Sex, age, genotyping batch and the first ten genetic principal components                                                                 | FinnGen <a href="https://www.finnngen.fi/fi">https://www.finnngen.fi/fi</a>                    |
|                                               | UK Biobank                                                       | 4,109 cases, 401,5252 controls       |                                 | 531.1, 531.5, 531.7, 531.9        | K25.1, K25.3, K25.5, K25.7, K25.9                                    | Sex, birth year, genotyping batch and first four principal components                                                                     | UK Biobank <a href="https://www.leelabsg.org/resources">https://www.leelabsg.org/resources</a> |
| Acute gastritis                               | FinnGen                                                          | 2,370 cases, 320,387 controls        | 53500, 53501, 53502             | 535.0                             | K29.0, K29.1                                                         | Sex, age, genotyping batch and the first ten genetic principal components                                                                 | FinnGen <a href="https://www.finnngen.fi/fi">https://www.finnngen.fi/fi</a>                    |
|                                               | UK Biobank                                                       | 1,184 cases, 378,124 controls        |                                 | 535                               | K29.0, K29.1                                                         | Sex, birth year, genotyping batch and first four principal components                                                                     | UK Biobank <a href="https://www.leelabsg.org/resources">https://www.leelabsg.org/resources</a> |
| Chronic gastritis (Atrophic gastritis)        | FinnGen                                                          | 9,570 cases, 320,387 controls        | 53503                           | 535.1, 535.4                      | K29.3, K29.4, K29.5                                                  | Sex, age, genotyping batch and the first ten genetic principal components                                                                 | FinnGen <a href="https://www.finnngen.fi/fi">https://www.finnngen.fi/fi</a>                    |
|                                               | UK Biobank                                                       | 370 cases, 378,124 controls          |                                 | 535.1                             | K29.4                                                                | Sex, birth year, genotyping batch and first four principal components                                                                     | UK Biobank <a href="https://www.leelabsg.org/resources">https://www.leelabsg.org/resources</a> |
| Irritable bowel syndrome                      | FinnGen                                                          | 9,323 cases, 301,931 controls        | 56419                           | 564.1                             | K58                                                                  | Sex, age, genotyping batch and the first ten genetic principal components                                                                 | FinnGen <a href="https://www.finnngen.fi/fi">https://www.finnngen.fi/fi</a>                    |
|                                               | UK Biobank                                                       | 5,548 cases, 334,783 controls        |                                 | 564.1                             | K58.0, K58.9                                                         | Sex, birth year, genotyping batch and first four principal components                                                                     | UK Biobank <a href="https://www.leelabsg.org/resources">https://www.leelabsg.org/resources</a> |
| Diverticular disease of intestine             | FinnGen                                                          | 30,649 cases, 301,931 controls       | 562                             | 562                               | K57                                                                  | Sex, age, genotyping batch and the first ten genetic principal components                                                                 | FinnGen <a href="https://www.finnngen.fi/fi">https://www.finnngen.fi/fi</a>                    |
|                                               | UK Biobank                                                       | 27,311 cases, 334,783 controls       |                                 | 562.0, 562.1                      | K57.0, K57.1, K57.2, K57.3, K57.4, K57.5, K57.8, K57.9               | Sex, birth year, genotyping batch and first four principal components                                                                     | UK Biobank <a href="https://www.leelabsg.org/resources">https://www.leelabsg.org/resources</a> |
| Cholelithiasis                                | FinnGen                                                          | 37,041 cases, 330,903 controls       | 574                             | 574                               | K80                                                                  | Sex, age, genotyping batch and the first ten genetic principal components                                                                 | FinnGen <a href="https://www.finnngen.fi/fi">https://www.finnngen.fi/fi</a>                    |
|                                               | UK Biobank                                                       | 13,777 cases, 391,307 controls       |                                 | 574.0, 574.1, 574.2               | K80.0, K80.1, K80.2, K80.3, K80.4, K80.8                             | Sex, birth year, genotyping batch and first four principal components                                                                     | UK Biobank <a href="https://www.leelabsg.org/resources">https://www.leelabsg.org/resources</a> |
| Cholecystitis                                 | FinnGen                                                          | 4,299 cases, 330,903 controls        | 574, 57500, 57501, 57502, 57503 | 574, 575.0, 575.1                 | K80, K81                                                             | Sex, age, genotyping batch and the first ten genetic principal components                                                                 | FinnGen <a href="https://www.finnngen.fi/fi">https://www.finnngen.fi/fi</a>                    |
|                                               | UK Biobank                                                       | 2,761 cases, 391,307 controls        |                                 | 574.0, 574.1, 574.2, 575.0, 575.1 | K80.0, K80.1, K80.2, K80.3, K80.4, K80.8, K81.0, K81.1, K81.8, K81.9 | Sex, birth year, genotyping batch and first four principal components                                                                     | UK Biobank <a href="https://www.leelabsg.org/resources">https://www.leelabsg.org/resources</a> |
| Nonalcoholic fatty liver disease              | FinnGen                                                          | 2,275 cases, 375,002 controls        |                                 |                                   | K76.0                                                                | Sex, age, genotyping batch and the first ten genetic principal components                                                                 | FinnGen <a href="https://www.finnngen.fi/fi">https://www.finnngen.fi/fi</a>                    |
|                                               | UK Biobank                                                       | 1,664 cases, 400,055 controls        |                                 | 571.5, 571.8, 571.9               | K74.0, K74.1, K74.2, K76.0                                           | Sex, birth year, genotyping batch and first four principal components                                                                     | UK Biobank <a href="https://www.leelabsg.org/resources">https://www.leelabsg.org/resources</a> |
| Cirrhosis                                     | FinnGen                                                          | 3,970 cases, 373,307 controls        | 5719                            | 571.5, 571.6                      | K74                                                                  | Sex, age, genotyping batch and the first ten genetic principal components                                                                 | FinnGen <a href="https://www.finnngen.fi/fi">https://www.finnngen.fi/fi</a>                    |
|                                               | UK Biobank                                                       | 2,895 cases, 400,055 controls        |                                 | 571.6                             | K74.3, K74.4, K74.5                                                  | Sex, birth year, genotyping batch and first four principal components                                                                     | UK Biobank <a href="https://www.leelabsg.org/resources">https://www.leelabsg.org/resources</a> |

ICD, International Classification of Diseases.

Table S2. Association of type 2 diabetes with ten gastrointestinal diseases.

| Exposure | Outcomes                               | Database   | n.snp | b.ivw    | Inverse variance weighted |          |                   |          |          | MR Egger |          |            |                   |                 | Weighted median |          |           |             |                   | Weighted mode |         |           |                   |
|----------|----------------------------------------|------------|-------|----------|---------------------------|----------|-------------------|----------|----------|----------|----------|------------|-------------------|-----------------|-----------------|----------|-----------|-------------|-------------------|---------------|---------|-----------|-------------------|
|          |                                        |            |       |          | se.ivw                    | pval.ivw | OR.ivw            | FDR *    | Q_pval   | b.egger  | se.egger | pval.egger | OR.egger          | egger intercept | egger_pval      | b.median | se.median | pval.median | OR.median         | b.mode        | se.mode | pval.mode | OR.mode           |
| T2D      | Acute gastritis                        | UK Biobank | 225   | 0.185    | 0.059                     | 0.002    | 1.20 (1.07, 1.35) | 0.004    | 0.625    | 0.065    | 0.119    | 0.588      | 1.07 (0.84, 1.35) | 0.008           | 0.246           | 0.177    | 0.117     | 0.128       | 1.19 (0.95, 1.50) | 0.210         | 0.122   | 0.087     | 1.23 (0.97, 1.57) |
| T2D      | Acute gastritis                        | Meta       | 225   | 0.092    | 0.035                     | 0.010    | 1.10 (1.02, 1.17) | 0.012    | 0.722    | -0.034   | 0.073    | 0.643      | 0.97 (0.84, 1.11) | 0.008           | 0.049           | 0.040    | 0.068     | 0.556       | 1.04 (0.91, 1.19) | 0.030         | 0.072   | 0.676     | 1.03 (0.90, 1.19) |
| T2D      | Acute gastritis                        | FinnGen    | 215   | 0.045    | 0.044                     | 0.303    | 1.05 (0.96, 1.14) | 0.303    | 0.225    | -0.084   | 0.093    | 0.372      | 0.92 (0.77, 1.10) | 0.008           | 0.117           | -0.051   | 0.080     | 0.525       | 0.95 (0.81, 1.11) | -0.046        | 0.095   | 0.625     | 0.95 (0.79, 1.15) |
| T2D      | Cholecystitis                          | UK Biobank | 225   | 0.132    | 0.045                     | 0.003    | 1.14 (1.05, 1.25) | 0.006    | 0.001    | 0.087    | 0.091    | 0.338      | 1.09 (0.91, 1.30) | 0.003           | 0.566           | 0.156    | 0.082     | 0.058       | 1.17 (0.99, 1.37) | 0.116         | 0.085   | 0.171     | 1.12 (0.95, 1.33) |
| T2D      | Cholecystitis                          | Meta       | 225   | 0.099    | 0.029                     | 0.001    | 1.10 (1.04, 1.17) | 0.002    | 4.88E-04 | 0.002    | 0.059    | 0.973      | 1.00 (0.89, 1.13) | 0.006           | 0.061           | 0.080    | 0.054     | 0.136       | 1.08 (0.97, 1.20) | 0.092         | 0.055   | 0.094     | 1.10 (0.98, 1.22) |
| T2D      | Cholecystitis                          | FinnGen    | 215   | 0.073    | 0.038                     | 0.053    | 1.08 (1.00, 1.16) | 0.075    | 4.33E-04 | -0.070   | 0.078    | 0.369      | 0.93 (0.80, 1.09) | 0.009           | 0.037           | 0.006    | 0.064     | 0.921       | 1.01 (0.89, 1.14) | -0.030        | 0.072   | 0.673     | 0.97 (0.84, 1.12) |
| T2D      | Cholelithiasis                         | UK Biobank | 225   | 0.102    | 0.026                     | 8.84E-05 | 1.11 (1.05, 1.17) | 0.001    | 5.00E-19 | 0.016    | 0.052    | 0.763      | 1.02 (0.92, 1.13) | 0.005           | 0.058           | 0.053    | 0.036     | 0.140       | 1.05 (0.98, 1.13) | 0.071         | 0.038   | 0.062     | 1.07 (1.00, 1.16) |
| T2D      | Cholelithiasis                         | Meta       | 224   | 0.077    | 0.021                     | 3.12E-04 | 1.08 (1.04, 1.13) | 0.001    | 6.57E-81 | -0.020   | 0.043    | 0.637      | 0.98 (0.90, 1.07) | 0.006           | 0.011           | 0.059    | 0.019     | 0.002       | 1.06 (1.02, 1.10) | 0.048         | 0.022   | 0.032     | 1.05 (1.00, 1.10) |
| T2D      | Cholelithiasis                         | FinnGen    | 215   | 0.067    | 0.023                     | 0.003    | 1.07 (1.02, 1.12) | 0.015    | 1.40E-62 | -0.037   | 0.046    | 0.426      | 0.96 (0.88, 1.06) | 0.006           | 0.011           | 0.032    | 0.021     | 0.124       | 1.03 (0.99, 1.08) | 0.020         | 0.025   | 0.414     | 1.02 (0.97, 1.07) |
| T2D      | Chronic gastritis (Atrophic gastritis) | UK Biobank | 225   | 2.90E-04 | 0.106                     | 0.998    | 1.00 (0.81, 1.23) | 0.998    | 0.592    | -0.206   | 0.213    | 0.335      | 0.81 (0.54, 1.24) | 0.013           | 0.267           | -0.164   | 0.193     | 0.397       | 0.85 (0.58, 1.24) | -0.130        | 0.241   | 0.591     | 0.88 (0.55, 1.41) |
| T2D      | Chronic gastritis (Atrophic gastritis) | Meta       | 224   | 0.067    | 0.025                     | 0.008    | 1.07 (1.02, 1.12) | 0.012    | 0.001    | 0.041    | 0.053    | 0.433      | 1.04 (0.94, 1.16) | 0.002           | 0.578           | 0.041    | 0.043     | 0.339       | 1.04 (0.96, 1.13) | 0.039         | 0.041   | 0.347     | 1.04 (0.98, 1.13) |
| T2D      | Chronic gastritis (Atrophic gastritis) | FinnGen    | 215   | 0.070    | 0.026                     | 0.006    | 1.07 (1.02, 1.13) | 0.018    | 0.001    | 0.053    | 0.053    | 0.319      | 1.05 (0.95, 1.17) | 0.001           | 0.720           | 0.057    | 0.042     | 0.176       | 1.06 (0.97, 1.15) | 0.058         | 0.042   | 0.172     | 1.06 (0.98, 1.15) |
| T2D      | Cirrhosis                              | UK Biobank | 225   | 0.127    | 0.054                     | 0.018    | 1.14 (1.02, 1.26) | 0.026    | 4.20E-17 | -0.218   | 0.105    | 0.039      | 0.80 (0.65, 0.99) | 0.022           | 1.99E-04        | -0.107   | 0.069     | 0.120       | 0.90 (0.79, 1.03) | -0.147        | 0.090   | 0.103     | 0.86 (0.72, 1.03) |
| T2D      | Cirrhosis                              | Meta       | 225   | 0.111    | 0.046                     | 0.015    | 1.12 (1.02, 1.22) | 0.017    | 4.93E-54 | -0.128   | 0.092    | 0.166      | 0.88 (0.73, 1.05) | 0.015           | 0.003           | -0.029   | 0.043     | 0.504       | 0.97 (0.89, 1.06) | -0.092        | 0.060   | 0.131     | 0.91 (0.81, 1.03) |
| T2D      | Cirrhosis                              | FinnGen    | 215   | 0.097    | 0.054                     | 0.072    | 1.10 (0.99, 1.22) | 0.090    | 7.13E-31 | -0.049   | 0.112    | 0.664      | 0.95 (0.77, 1.19) | 0.009           | 0.138           | 0.028    | 0.054     | 0.597       | 1.03 (0.93, 1.14) | -0.002        | 0.079   | 0.983     | 1.00 (0.85, 1.17) |
| T2D      | Diverticular disease                   | UK Biobank | 225   | 0.039    | 0.019                     | 0.045    | 1.04 (1.00, 1.08) | 0.050    | 6.72E-20 | -0.113   | 0.038    | 0.003      | 0.89 (0.83, 0.96) | 0.010           | 4.92E-06        | -0.004   | 0.023     | 0.853       | 1.00 (0.95, 1.04) | -0.037        | 0.032   | 0.260     | 0.96 (0.90, 1.03) |
| T2D      | Diverticular disease                   | Meta       | 225   | 0.034    | 0.016                     | 0.035    | 1.04 (1.00, 1.07) | 0.035    | 1.41E-36 | -0.103   | 0.032    | 0.001      | 0.90 (0.85, 0.96) | 0.009           | 1.47E-06        | -0.014   | 0.019     | 0.473       | 0.99 (0.95, 1.02) | -0.041        | 0.023   | 0.670     | 0.96 (0.92, 1.00) |
| T2D      | Diverticular disease                   | FinnGen    | 215   | 0.030    | 0.019                     | 0.119    | 1.03 (0.99, 1.07) | 0.133    | 5.63E-20 | -0.094   | 0.039    | 0.017      | 0.91 (0.84, 0.98) | 0.008           | 3.62E-04        | -0.012   | 0.022     | 0.581       | 0.99 (0.95, 1.03) | -0.047        | 0.027   | 0.088     | 0.95 (0.90, 1.01) |
| T2D      | Gastric ulcer                          | UK Biobank | 225   | 0.120    | 0.032                     | 1.85E-04 | 1.13 (1.06, 1.20) | 0.001    | 0.539    | 0.117    | 0.065    | 0.071      | 1.12 (0.99, 1.28) | 1.66E-04        | 0.962           | 0.143    | 0.065     | 0.027       | 1.15 (1.02, 1.31) | 0.164         | 0.066   | 0.014     | 1.18 (1.03, 1.34) |
| T2D      | Gastric ulcer                          | Meta       | 225   | 0.096    | 0.021                     | 5.37E-06 | 1.10 (1.06, 1.15) | 2.69E-05 | 0.086    | 0.055    | 0.046    | 0.238      | 1.06 (0.96, 1.16) | 0.003           | 0.300           | 0.086    | 0.042     | 0.041       | 1.09 (1.00, 1.18) | 0.077         | 0.046   | 0.097     | 1.08 (0.99, 1.18) |
| T2D      | Gastric ulcer                          | FinnGen    | 215   | 0.073    | 0.028                     | 0.009    | 1.08 (1.02, 1.14) | 0.018    | 0.310    | -0.007   | 0.059    | 0.909      | 0.99 (0.88, 1.11) | 0.005           | 0.124           | 0.030    | 0.056     | 0.593       | 1.03 (0.92, 1.15) | 0.013         | 0.060   | 0.833     | 1.01 (0.90, 1.14) |
| T2D      | Gastroesophageal reflux disease        | UK Biobank | 225   | 0.057    | 0.020                     | 0.006    | 1.06 (1.02, 1.10) | 0.009    | 2.79E-04 | -0.036   | 0.041    | 0.377      | 0.96 (0.89, 1.04) | 0.004           | 0.009           | 0.016    | 0.028     | 0.576       | 1.02 (0.96, 1.07) | 0.001         | 0.037   | 0.988     | 1.00 (0.93, 1.08) |
| T2D      | Gastroesophageal reflux disease        | Meta       | 225   | 0.045    | 0.015                     | 0.002    | 1.05 (1.02, 1.08) | 0.004    | 1.53E-10 | -0.025   | 0.030    | 0.399      | 0.98 (0.92, 1.03) | 0.004           | 0.007           | 0.014    | 0.019     | 0.456       | 1.01 (0.98, 1.05) | 0.002         | 0.024   | 0.933     | 1.00 (0.96, 1.05) |
| T2D      | Gastroesophageal reflux disease        | FinnGen    | 215   | 0.038    | 0.017                     | 0.027    | 1.04 (1.00, 1.07) | 0.045    | 9.39E-08 | -0.018   | 0.036    | 0.603      | 0.98 (0.92, 1.05) | 0.003           | 0.070           | -0.002   | 0.025     | 0.926       | 1.00 (0.95, 1.05) | 0.000         | 0.030   | 0.999     | 1.00 (0.94, 1.06) |
| T2D      | Irritable bowel syndrome               | UK Biobank | 225   | 0.069    | 0.032                     | 0.029    | 1.07 (1.01, 1.14) | 0.037    | 0.001    | 0.013    | 0.064    | 0.842      | 1.01 (0.89, 1.15) | 0.004           | 0.310           | 0.102    | 0.053     | 0.054       | 1.11 (1.00, 1.23) | 0.025         | 0.055   | 0.642     | 1.03 (0.92, 1.14) |
| T2D      | Irritable bowel syndrome               | Meta       | 225   | 0.069    | 0.021                     | 0.001    | 1.07 (1.03, 1.12) | 0.002    | 2.89E-05 | -0.016   | 0.043    | 0.704      | 0.98 (0.90, 1.07) | 0.005           | 0.024           | 0.053    | 0.036     | 0.139       | 1.05 (0.98, 1.13) | 0.041         | 0.037   | 0.267     | 1.04 (0.97, 1.12) |
| T2D      | Irritable bowel syndrome               | FinnGen    | 215   | 0.065    | 0.025                     | 0.008    | 1.07 (1.02, 1.12) | 0.018    | 0.010    | -0.037   | 0.051    | 0.471      | 0.96 (0.87, 1.07) | 0.006           | 0.023           | 0.031    | 0.041     | 0.458       | 1.03 (0.95, 1.12) | 0.042         | 0.048   | 0.383     | 1.04 (0.95, 1.14) |
| T2D      | Nonalcoholic fatty liver disease       | UK Biobank | 225   | 0.239    | 0.067                     | 3.97E-04 | 1.27 (1.11, 1.45) | 0.001    | 1.23E-12 | -0.176   | 0.132    | 0.184      | 0.84 (0.65, 1.09) | 0.026           | 3.69E-04        | 0.103    | 0.086     | 0.231       | 1.11 (0.94, 1.31) | 0.037         | 0.109   | 0.737     | 1.04 (0.84, 1.29) |
| T2D      | Nonalcoholic fatty liver disease       | Meta       | 225   | 0.307    | 0.060                     | 2.94E-07 | 1.36 (1.21, 1.53) | 2.94E-06 | 1.99E-53 | 0.010    | 0.121    | 0.932      | 1.01 (0.80, 1.28) | 0.018           | 0.005           | 0.158    | 0.058     | 0.006       | 1.17 (1.05, 1.31) | 0.014         | 0.078   | 0.858     | 1.01 (0.87, 1.18) |
| T2D      | Nonalcoholic fatty liver disease       | FinnGen    | 215   | 0.366    | 0.070                     | 1.59E-07 | 1.44 (1.26, 1.65) | 1.59E-06 | 1.33E-28 | 0.185    | 0.144    | 0.203      | 1.20 (0.91, 1.60) | 0.011           | 0.153           | 0.176    | 0.073     | 0.017       | 1.19 (1.03, 1.38) | 0.054         | 0.100   | 0.594     | 1.06 (0.87, 1.28) |

\*FDR performed by datasource

FDR, false discovery rate. CI, confidence interval



Table S3. Association of type 2 diabetes with deCODE plasma protein

| Gene      | Uniprot | nsnp   | bw  | sw    | prval | CIlow                 | FOR_low | Q        | val    | egger | segger | prval_egger | CIlow_egger | egger | Interegger | prval_inter | semedian | prval_semedian | CIlow_semedian | bmode | semedian | prval_semedian | CIlow_semedian |       |       |           |           |       |       |
|-----------|---------|--------|-----|-------|-------|-----------------------|---------|----------|--------|-------|--------|-------------|-------------|-------|------------|-------------|----------|----------------|----------------|-------|----------|----------------|----------------|-------|-------|-----------|-----------|-------|-------|
| 8897_38   | BGAT3   | Q47678 | 211 | 0.051 | 0.013 | 1.36E-04 (0.02, 0.08) | 0.005   | 0.005    | 0.012  | 0.026 | 0.056  | 0.011       | 0.006       | 0.009 | 0.009      | 0.009       | 0.006    | 0.009          | 0.021          | 0.006 | 0.011    | 0.005          | 0.022          | 0.024 | 0.361 | 0.022     | 0.033     | 0.077 |       |
| 11187_11  | CLEC1E3 | Q27429 | 211 | 0.046 | 0.015 | 3.9E-04 (0.02, 0.05)  | 0.005   | 0.005    | 0.012  | 0.026 | 0.056  | 0.011       | 0.006       | 0.009 | 0.009      | 0.009       | 0.006    | 0.009          | 0.021          | 0.006 | 0.011    | 0.005          | 0.022          | 0.024 | 0.361 | 0.022     | 0.033     | 0.077 |       |
| 17836_17  | S100A16 | Q9P706 | 211 | 0.050 | 0.013 | 1.42E-04 (0.02, 0.08) | 0.004   | 0.024    | -0.020 | 0.026 | 0.472  | -0.027      | 0.007       | 0.003 | 0.004      | 0.002       | 0.003    | 0.021          | 0.009          | 0.034 | 0.011    | 0.005          | 0.022          | 0.024 | 0.902 | -2.86E-03 | 0.05      | 0.04  |       |
| 13614_16  | CRABP1  | Q92793 | 211 | 0.051 | 0.013 | 1.44E-04 (0.02, 0.08) | 0.004   | 0.024    | -0.020 | 0.026 | 0.472  | -0.027      | 0.007       | 0.003 | 0.004      | 0.002       | 0.003    | 0.021          | 0.009          | 0.034 | 0.011    | 0.005          | 0.022          | 0.024 | 0.902 | -2.86E-03 | 0.05      | 0.04  |       |
| 11440_58  | SOCS3   | Q92793 | 211 | 0.051 | 0.013 | 1.44E-04 (0.02, 0.08) | 0.004   | 0.024    | -0.020 | 0.026 | 0.472  | -0.027      | 0.007       | 0.003 | 0.004      | 0.002       | 0.003    | 0.021          | 0.009          | 0.034 | 0.011    | 0.005          | 0.022          | 0.024 | 0.902 | -2.86E-03 | 0.05      | 0.04  |       |
| 4152_58   | KLHL1   | Q92793 | 211 | 0.062 | 0.016 | 1.49E-04 (0.02, 0.09) | 0.004   | 4.98E-12 | 0.043  | 0.033 | 0.193  | 0.04        | 0.022       | 0.011 | 0.009      | 0.008       | 0.002    | 0.010          | 0.006          | 0.022 | 0.006    | 0.011          | 0.005          | 0.022 | 0.024 | 0.902     | -2.86E-03 | 0.05  | 0.04  |
| 7741_14   | KNO1    | Q92793 | 211 | 0.062 | 0.016 | 1.49E-04 (0.02, 0.09) | 0.004   | 4.98E-12 | 0.043  | 0.033 | 0.193  | 0.04        | 0.022       | 0.011 | 0.009      | 0.008       | 0.002    | 0.010          | 0.006          | 0.022 | 0.006    | 0.011          | 0.005          | 0.022 | 0.024 | 0.902     | -2.86E-03 | 0.05  | 0.04  |
| 5658_64   | F1B3    | P05160 | 211 | 0.051 | 0.014 | 1.56E-04 (0.02, 0.08) | 0.004   | 0.002    | 0.011  | 0.026 | 0.080  | 0.011       | 0.006       | 0.009 | 0.009      | 0.009       | 0.009    | 0.006          | 0.009          | 0.021 | 0.006    | 0.011          | 0.005          | 0.022 | 0.024 | 0.902     | -2.86E-03 | 0.05  | 0.04  |
| 11219_95  | F2FR3   | Q92793 | 211 | 0.050 | 0.013 | 1.57E-04 (0.02, 0.08) | 0.004   | 0.011    | 0.091  | 0.026 | 0.080  | 0.011       | 0.006       | 0.009 | 0.009      | 0.009       | 0.009    | 0.006          | 0.009          | 0.021 | 0.006    | 0.011          | 0.005          | 0.022 | 0.024 | 0.902     | -2.86E-03 | 0.05  | 0.04  |
| 10041_3   | HNFA4   | Q14258 | 211 | 0.051 | 0.013 | 1.58E-04 (0.02, 0.08) | 0.004   | 0.003    | 0.007  | 0.026 | 0.080  | 0.011       | 0.006       | 0.009 | 0.009      | 0.009       | 0.009    | 0.006          | 0.009          | 0.021 | 0.006    | 0.011          | 0.005          | 0.022 | 0.024 | 0.902     | -2.86E-03 | 0.05  | 0.04  |
| 6089_17   | GNB1L   | Q92793 | 211 | 0.051 | 0.013 | 1.62E-04 (0.02, 0.08) | 0.004   | 0.003    | 0.007  | 0.026 | 0.080  | 0.011       | 0.006       | 0.009 | 0.009      | 0.009       | 0.009    | 0.006          | 0.009          | 0.021 | 0.006    | 0.011          | 0.005          | 0.022 | 0.024 | 0.902     | -2.86E-03 | 0.05  | 0.04  |
| 8660_33   | GRAP2   | Q92793 | 211 | 0.058 | 0.015 | 1.74E-04 (0.02, 0.09) | 0.004   | 1.63E-05 | 0.050  | 0.026 | 0.080  | 0.011       | 0.006       | 0.009 | 0.009      | 0.009       | 0.009    | 0.006          | 0.009          | 0.021 | 0.006    | 0.011          | 0.005          | 0.022 | 0.024 | 0.902     | -2.86E-03 | 0.05  | 0.04  |
| 18566_12  | CR1     | Q92793 | 211 | 0.058 | 0.015 | 1.74E-04 (0.02, 0.09) | 0.004   | 1.63E-05 | 0.050  | 0.026 | 0.080  | 0.011       | 0.006       | 0.009 | 0.009      | 0.009       | 0.009    | 0.006          | 0.009          | 0.021 | 0.006    | 0.011          | 0.005          | 0.022 | 0.024 | 0.902     | -2.86E-03 | 0.05  | 0.04  |
| 33174_74  | ERAA1   | P58159 | 211 | 0.055 | 0.015 | 1.81E-04 (0.02, 0.09) | 0.004   | 1.85E-06 | 0.050  | 0.026 | 0.080  | 0.011       | 0.006       | 0.009 | 0.009      | 0.009       | 0.009    | 0.006          | 0.009          | 0.021 | 0.006    | 0.011          | 0.005          | 0.022 | 0.024 | 0.902     | -2.86E-03 | 0.05  | 0.04  |
| 15324_25  | HSB272  | Q92793 | 211 | 0.055 | 0.015 | 1.85E-04 (0.02, 0.09) | 0.004   | 6.07E-07 | 0.017  | 0.029 | 0.080  | 0.011       | 0.006       | 0.009 | 0.009      | 0.009       | 0.009    | 0.006          | 0.009          | 0.021 | 0.006    | 0.011          | 0.005          | 0.022 | 0.024 | 0.902     | -2.86E-03 | 0.05  | 0.04  |
| 5412_53   | CD32    | Q92793 | 211 | 0.046 | 0.012 | 1.91E-04 (0.02, 0.07) | 0.005   | 0.28E    | 0.025  | 0.025 | 0.314  | 0.03        | 0.027       | 0.013 | 0.011      | 0.011       | 0.011    | 0.011          | 0.011          | 0.011 | 0.011    | 0.011          | 0.011          | 0.011 | 0.011 | 0.011     | 0.011     | 0.011 | 0.011 |
| 3311_27   | FCGR2B  | P05845 | 211 | 0.060 | 0.016 | 1.93E-04 (0.02, 0.09) | 0.005   | 5.98E-10 | 0.065  | 0.032 | 0.042  | 0.07        | 0.027       | 0.013 | 0.011      | 0.011       | 0.011    | 0.011          | 0.011          | 0.011 | 0.011    | 0.011          | 0.011          | 0.011 | 0.011 | 0.011     | 0.011     | 0.011 | 0.011 |
| 8653_1    | PLD2    | Q04489 | 211 | 0.060 | 0.016 | 1.93E-04 (0.02, 0.09) | 0.005   | 5.98E-10 | 0.065  | 0.032 | 0.042  | 0.07        | 0.027       | 0.013 | 0.011      | 0.011       | 0.011    | 0.011          | 0.011          | 0.011 | 0.011    | 0.011          | 0.011          | 0.011 | 0.011 | 0.011     | 0.011     | 0.011 | 0.011 |
| 5307_12   | FR      | P00740 | 211 | 0.066 | 0.018 | 2.00E-04 (0.02, 0.10) | 0.005   | 1.32E-19 | 0.111  | 0.035 | 0.176  | 0.03        | 0.028       | 0.016 | 0.011      | 0.011       | 0.011    | 0.011          | 0.011          | 0.011 | 0.011    | 0.011          | 0.011          | 0.011 | 0.011 | 0.011     | 0.011     | 0.011 | 0.011 |
| 18698_198 | TLR3    | Q15455 | 211 | 0.044 | 0.012 | 2.01E-04 (0.02, 0.07) | 0.005   | 0.351    | 0.034  | 0.024 | 0.184  | 0.03        | 0.028       | 0.016 | 0.011      | 0.011       | 0.011    | 0.011          | 0.011          | 0.011 | 0.011    | 0.011          | 0.011          | 0.011 | 0.011 | 0.011     | 0.011     | 0.011 | 0.011 |
| 8221_1    | ADPR    | Q15455 | 211 | 0.045 | 0.012 | 2.06E-04 (0.02, 0.07) | 0.005   | 0.620    | 0.015  | 0.025 | 0.185  | 0.03        | 0.028       | 0.016 | 0.011      | 0.011       | 0.011    | 0.011          | 0.011          | 0.011 | 0.011    | 0.011          | 0.011          | 0.011 | 0.011 | 0.011     | 0.011     | 0.011 | 0.011 |
| 13842_44  | HSPA9   | P38844 | 211 | 0.043 | 0.012 | 2.18E-04 (0.02, 0.07) | 0.005   | 0.169    | 0.021  | 0.024 | 0.393  | 0.02        | 0.037       | 0.023 | 0.011      | 0.011       | 0.011    | 0.011          | 0.011          | 0.011 | 0.011    | 0.011          | 0.011          | 0.011 | 0.011 | 0.011     | 0.011     | 0.011 | 0.011 |
| 3093_23   | TGFR3   | Q03167 | 211 | 0.057 | 0.015 | 2.28E-04 (0.02, 0.09) | 0.005   | 4.25E-07 | 0.028  | 0.030 | 0.381  | 0.03        | 0.039       | 0.023 | 0.011      | 0.011       | 0.011    | 0.011          | 0.011          | 0.011 | 0.011    | 0.011          | 0.011          | 0.011 | 0.011 | 0.011     | 0.011     | 0.011 | 0.011 |
| 10613_33  | CASC4   | Q9P4E1 | 211 | 0.048 | 0.013 | 2.43E-04 (0.02, 0.07) | 0.006   | 0.037    | 0.056  | 0.026 | 0.030  | 0.06        | 0.011       | 0.011 | 0.011      | 0.011       | 0.011    | 0.011          | 0.011          | 0.011 | 0.011    | 0.011          | 0.011          | 0.011 | 0.011 | 0.011     | 0.011     | 0.011 | 0.011 |
| 10717_4   | ACE     | P12821 | 211 | 0.043 | 0.012 | 2.63E-04 (0.02, 0.07) | 0.006   | 0.069    | 0.088  | 0.025 | 0.001  | 0.09        | 0.04        | 0.013 | 0.011      | 0.011       | 0.011    | 0.011          | 0.011          | 0.011 | 0.011    | 0.011          | 0.011          | 0.011 | 0.011 | 0.011     | 0.011     | 0.011 | 0.011 |
| 7038_45   | STR3A4  | Q92187 | 211 | 0.043 | 0.012 | 2.63E-04 (0.02, 0.07) | 0.006   | 0.069    | 0.088  | 0.025 | 0.001  | 0.09        | 0.04        | 0.013 | 0.011      | 0.011       | 0.011    | 0.011          | 0.011          | 0.011 | 0.011    | 0.011          | 0.011          | 0.011 | 0.011 | 0.011     | 0.011     | 0.011 | 0.011 |
| 8233_2    | THS     | Q96UJ2 | 211 | 0.052 | 0.014 | 2.71E-04 (0.02, 0.08) | 0.006   | 0.007    | 0.088  | 0.025 | 0.001  | 0.10        | 0.04        | 0.015 | 0.011      | 0.011       | 0.011    | 0.011          | 0.011          | 0.011 | 0.011    | 0.011          | 0.011          | 0.011 | 0.011 | 0.011     | 0.011     | 0.011 | 0.011 |
| 17752_13  | KCAL1   | Q91015 | 211 | 0.052 | 0.014 | 2.74E-04 (0.02, 0.08) | 0.006   | 1.65E-04 | 0.008  | 0.028 | 0.752  | 0.01        | 0.05        | 0.006 | 0.003      | 0.003       | 0.003    | 0.003          | 0.003          | 0.003 | 0.003    | 0.003          | 0.003          | 0.003 | 0.003 | 0.003     | 0.003     | 0.003 | 0.003 |
| 7071_9    | LR      | Q15455 | 211 | 0.045 | 0.012 | 2.85E-04 (0.02, 0.08) | 0.006   | 3.71E-07 | 0.029  | 0.029 | 0.335  | 0.01        | 0.033       | 0.015 | 0.011      | 0.011       | 0.011    | 0.011          | 0.011          | 0.011 | 0.011    | 0.011          | 0.011          | 0.011 | 0.011 | 0.011     | 0.011     | 0.011 | 0.011 |
| 8009_33   | SRFBP1  | Q92793 | 211 | 0.045 | 0.012 | 2.85E-04 (0.02, 0.08) | 0.006   | 3.71E-07 | 0.029  | 0.029 | 0.335  | 0.01        | 0.033       | 0.015 | 0.011      | 0.011       | 0.011    | 0.011          | 0.011          | 0.011 | 0.011    | 0.011          | 0.011          | 0.011 | 0.011 | 0.011     | 0.011     | 0.011 | 0.011 |
| 13614_16  | CRABP1  | Q92793 | 211 | 0.051 | 0.013 | 1.44E-04 (0.02, 0.08) | 0.004   | 0.024    | -0.020 | 0.026 | 0.472  | -0.027      | 0.007       | 0.003 | 0.004      | 0.002       | 0.003    | 0.021          | 0.009          | 0.034 | 0.011    | 0.005          | 0.022          | 0.024 | 0.902 | -2.86E-03 | 0.05      | 0.04  |       |
| 11440_58  | SOCS3   | Q92793 | 211 | 0.051 | 0.013 | 1.44E-04 (0.02, 0.08) | 0.004   | 0.024    | -0.020 | 0.026 | 0.472  | -0.027      | 0.007       | 0.003 | 0.004      | 0.002       | 0.003    | 0.021          | 0.009          | 0.034 | 0.011    | 0.005          | 0.022          | 0.024 | 0.902 | -2.86E-03 | 0.05      | 0.04  |       |
| 4152_58   | KLHL1   | Q92793 | 211 | 0.062 | 0.016 | 1.49E-04 (0.02, 0.09) | 0.004   | 4.98E-12 | 0.043  | 0.033 | 0.193  | 0.04        | 0.022       | 0.011 | 0.009      | 0.008       | 0.002    | 0.010          | 0.006          | 0.022 | 0.006    | 0.011          | 0.005          | 0.022 | 0.024 | 0.902     | -2.86E-03 | 0.05  | 0.04  |
| 7741_14   | KNO1    | Q92793 | 211 | 0.062 | 0.016 | 1.49E-04 (0.02, 0.09) | 0.004   | 4.98E-12 | 0.043  | 0.033 | 0.193  | 0.04        | 0.022       | 0.011 | 0.009      | 0.008       | 0.002    | 0.010          | 0.006          | 0.022 | 0.006    | 0.011          | 0.005          | 0.022 | 0.024 | 0.902     | -2.86E-03 | 0.05  | 0.04  |
| 5658_64   | F1B3    | P05160 | 211 | 0.051 | 0.014 | 1.56E-04 (0.02, 0.08) | 0.004   | 0.002    | 0.011  | 0.026 | 0.080  | 0.011       | 0.006       | 0.009 | 0.009      | 0.009       | 0.009    | 0.00           |                |       |          |                |                |       |       |           |           |       |       |



Table S3. Association of type 2 diabetes with deCODE plasma protein

| SNP       | Gene     | Uniprot | nsnp   | bw   | sv   | prv  | cliv | FDR   | Q_val | beqger | segger | prvsegger | egger                  | integger           | prvmedian | semedian | prvmedian | clmedian | bmode              | semode             | prvmedian | clmedian |                    |                       |
|-----------|----------|---------|--------|------|------|------|------|-------|-------|--------|--------|-----------|------------------------|--------------------|-----------|----------|-----------|----------|--------------------|--------------------|-----------|----------|--------------------|-----------------------|
| 14153.8   | EPAS3    | EPAS3   | 211    | 0.03 | 0.01 | 0.01 | 0.01 | 0.002 | 0.005 | 0.002  | 0.025  | 0.940     | -1.91e-03 (0.05, 0.05) | 0.002              | 0.102     | 0.007    | 0.21      | 0.78     | 0.01 (-0.03, 0.05) | 0.015              | 0.222     | 0.488    | 0.02 (-0.03, 0.06) |                       |
| 9212.2    | CTSF     | OR6K1   | 211    | 0.04 | 0.01 | 0.01 | 0.01 | 0.002 | 0.005 | 0.002  | 0.015  | 0.036     | 0.667                  | 0.02 (-0.05, 0.09) | 0.002     | 0.322    | 0.019     | 0.22     | 0.960              | 0.02 (-0.02, 0.06) | 0.021     | 0.247    | 0.440              | 0.02 (-0.03, 0.07)    |
| 1329.39   | NAP1L2   | OR6U6   | 211    | 0.03 | 0.01 | 0.01 | 0.01 | 0.002 | 0.005 | 0.002  | 0.015  | 0.029     | 0.883                  | 0.01 (-0.07, 0.05) | 0.002     | 0.052    | 0.008     | 0.22     | 0.960              | 0.01 (-0.03, 0.05) | 0.002     | 0.244    | 0.444              | 0.17e-03 (0.05, 0.05) |
| 9480.7    | DUSP9    | OR6U7   | 211    | 0.03 | 0.01 | 0.01 | 0.01 | 0.002 | 0.005 | 0.002  | 0.015  | 0.029     | 0.883                  | 0.01 (-0.07, 0.05) | 0.002     | 0.052    | 0.008     | 0.22     | 0.960              | 0.01 (-0.03, 0.05) | 0.002     | 0.244    | 0.444              | 0.17e-03 (0.05, 0.05) |
| 8800.14   | CLC7     | OR6A7   | 211    | 0.03 | 0.01 | 0.01 | 0.01 | 0.002 | 0.005 | 0.002  | 0.015  | 0.029     | 0.883                  | 0.01 (-0.07, 0.05) | 0.002     | 0.052    | 0.008     | 0.22     | 0.960              | 0.01 (-0.03, 0.05) | 0.002     | 0.244    | 0.444              | 0.17e-03 (0.05, 0.05) |
| 5644.30   | RNASEH2B | OR6U8   | 211    | 0.03 | 0.01 | 0.01 | 0.01 | 0.002 | 0.005 | 0.002  | 0.015  | 0.029     | 0.883                  | 0.01 (-0.07, 0.05) | 0.002     | 0.052    | 0.008     | 0.22     | 0.960              | 0.01 (-0.03, 0.05) | 0.002     | 0.244    | 0.444              | 0.17e-03 (0.05, 0.05) |
| 8874.53   | TCF7     | OR5Y03  | 211    | 0.03 | 0.01 | 0.01 | 0.01 | 0.002 | 0.005 | 0.002  | 0.015  | 0.029     | 0.883                  | 0.01 (-0.07, 0.05) | 0.002     | 0.052    | 0.008     | 0.22     | 0.960              | 0.01 (-0.03, 0.05) | 0.002     | 0.244    | 0.444              | 0.17e-03 (0.05, 0.05) |
| 9405.74   | PSS2     | P11465  | 211    | 0.03 | 0.01 | 0.01 | 0.01 | 0.002 | 0.005 | 0.002  | 0.015  | 0.029     | 0.883                  | 0.01 (-0.07, 0.05) | 0.002     | 0.052    | 0.008     | 0.22     | 0.960              | 0.01 (-0.03, 0.05) | 0.002     | 0.244    | 0.444              | 0.17e-03 (0.05, 0.05) |
| 11107.25  | TENAC2   | OR6P73  | 211    | 0.03 | 0.01 | 0.01 | 0.01 | 0.002 | 0.005 | 0.002  | 0.015  | 0.029     | 0.883                  | 0.01 (-0.07, 0.05) | 0.002     | 0.052    | 0.008     | 0.22     | 0.960              | 0.01 (-0.03, 0.05) | 0.002     | 0.244    | 0.444              | 0.17e-03 (0.05, 0.05) |
| 5658.53   | ENDOU    | P21128  | 211    | 0.03 | 0.01 | 0.01 | 0.01 | 0.002 | 0.005 | 0.002  | 0.015  | 0.029     | 0.883                  | 0.01 (-0.07, 0.05) | 0.002     | 0.052    | 0.008     | 0.22     | 0.960              | 0.01 (-0.03, 0.05) | 0.002     | 0.244    | 0.444              | 0.17e-03 (0.05, 0.05) |
| 14029.42  | COPC2    | PO1201  | 211    | 0.03 | 0.01 | 0.01 | 0.01 | 0.002 | 0.005 | 0.002  | 0.015  | 0.029     | 0.883                  | 0.01 (-0.07, 0.05) | 0.002     | 0.052    | 0.008     | 0.22     | 0.960              | 0.01 (-0.03, 0.05) | 0.002     | 0.244    | 0.444              | 0.17e-03 (0.05, 0.05) |
| 1024.52   | SCGB3A1  | OR6U91  | 211    | 0.03 | 0.01 | 0.01 | 0.01 | 0.002 | 0.005 | 0.002  | 0.015  | 0.029     | 0.883                  | 0.01 (-0.07, 0.05) | 0.002     | 0.052    | 0.008     | 0.22     | 0.960              | 0.01 (-0.03, 0.05) | 0.002     | 0.244    | 0.444              | 0.17e-03 (0.05, 0.05) |
| 17006.9   | SRFBP2   | OR6U92  | 211    | 0.03 | 0.01 | 0.01 | 0.01 | 0.002 | 0.005 | 0.002  | 0.015  | 0.029     | 0.883                  | 0.01 (-0.07, 0.05) | 0.002     | 0.052    | 0.008     | 0.22     | 0.960              | 0.01 (-0.03, 0.05) | 0.002     | 0.244    | 0.444              | 0.17e-03 (0.05, 0.05) |
| 17333.20  | ACAD8    | P11510  | 211    | 0.03 | 0.01 | 0.01 | 0.01 | 0.002 | 0.005 | 0.002  | 0.015  | 0.029     | 0.883                  | 0.01 (-0.07, 0.05) | 0.002     | 0.052    | 0.008     | 0.22     | 0.960              | 0.01 (-0.03, 0.05) | 0.002     | 0.244    | 0.444              | 0.17e-03 (0.05, 0.05) |
| 10782.2   | KLRG2    | ADN130  | 211    | 0.03 | 0.01 | 0.01 | 0.01 | 0.002 | 0.005 | 0.002  | 0.015  | 0.029     | 0.883                  | 0.01 (-0.07, 0.05) | 0.002     | 0.052    | 0.008     | 0.22     | 0.960              | 0.01 (-0.03, 0.05) | 0.002     | 0.244    | 0.444              | 0.17e-03 (0.05, 0.05) |
| 7173.141  | BFI1     | TMEM332 | OR6U93 | 211  | 0.03 | 0.01 | 0.01 | 0.002 | 0.005 | 0.002  | 0.015  | 0.029     | 0.883                  | 0.01 (-0.07, 0.05) | 0.002     | 0.052    | 0.008     | 0.22     | 0.960              | 0.01 (-0.03, 0.05) | 0.002     | 0.244    | 0.444              | 0.17e-03 (0.05, 0.05) |
| 17482.19  | BFI1     | TMEM332 | OR6U93 | 211  | 0.03 | 0.01 | 0.01 | 0.002 | 0.005 | 0.002  | 0.015  | 0.029     | 0.883                  | 0.01 (-0.07, 0.05) | 0.002     | 0.052    | 0.008     | 0.22     | 0.960              | 0.01 (-0.03, 0.05) | 0.002     | 0.244    | 0.444              | 0.17e-03 (0.05, 0.05) |
| 17329.2   | BHD2     | OR6U94  | 211    | 0.03 | 0.01 | 0.01 | 0.01 | 0.002 | 0.005 | 0.002  | 0.015  | 0.029     | 0.883                  | 0.01 (-0.07, 0.05) | 0.002     | 0.052    | 0.008     | 0.22     | 0.960              | 0.01 (-0.03, 0.05) | 0.002     | 0.244    | 0.444              | 0.17e-03 (0.05, 0.05) |
| 4335.20   | BSI1     | OR6U95  | 211    | 0.03 | 0.01 | 0.01 | 0.01 | 0.002 | 0.005 | 0.002  | 0.015  | 0.029     | 0.883                  | 0.01 (-0.07, 0.05) | 0.002     | 0.052    | 0.008     | 0.22     | 0.960              | 0.01 (-0.03, 0.05) | 0.002     | 0.244    | 0.444              | 0.17e-03 (0.05, 0.05) |
| 8811.103  | GLEC3A   | OR6U96  | 211    | 0.03 | 0.01 | 0.01 | 0.01 | 0.002 | 0.005 | 0.002  | 0.015  | 0.029     | 0.883                  | 0.01 (-0.07, 0.05) | 0.002     | 0.052    | 0.008     | 0.22     | 0.960              | 0.01 (-0.03, 0.05) | 0.002     | 0.244    | 0.444              | 0.17e-03 (0.05, 0.05) |
| 9363.11   | CTSO     | OR6U97  | 211    | 0.03 | 0.01 | 0.01 | 0.01 | 0.002 | 0.005 | 0.002  | 0.015  | 0.029     | 0.883                  | 0.01 (-0.07, 0.05) | 0.002     | 0.052    | 0.008     | 0.22     | 0.960              | 0.01 (-0.03, 0.05) | 0.002     | 0.244    | 0.444              | 0.17e-03 (0.05, 0.05) |
| 8898.17   | TKOAS1   | P24257  | 211    | 0.03 | 0.01 | 0.01 | 0.01 | 0.002 | 0.005 | 0.002  | 0.015  | 0.029     | 0.883                  | 0.01 (-0.07, 0.05) | 0.002     | 0.052    | 0.008     | 0.22     | 0.960              | 0.01 (-0.03, 0.05) | 0.002     | 0.244    | 0.444              | 0.17e-03 (0.05, 0.05) |
| 3077.66   | F10      | P00742  | 211    | 0.03 | 0.01 | 0.01 | 0.01 | 0.002 | 0.005 | 0.002  | 0.015  | 0.029     | 0.883                  | 0.01 (-0.07, 0.05) | 0.002     | 0.052    | 0.008     | 0.22     | 0.960              | 0.01 (-0.03, 0.05) | 0.002     | 0.244    | 0.444              | 0.17e-03 (0.05, 0.05) |
| 8415.90   | CPN2     | P22792  | 211    | 0.03 | 0.01 | 0.01 | 0.01 | 0.002 | 0.005 | 0.002  | 0.015  | 0.029     | 0.883                  | 0.01 (-0.07, 0.05) | 0.002     | 0.052    | 0.008     | 0.22     | 0.960              | 0.01 (-0.03, 0.05) | 0.002     | 0.244    | 0.444              | 0.17e-03 (0.05, 0.05) |
| 11352.168 | TKOAS1   | OR6U97  | 211    | 0.03 | 0.01 | 0.01 | 0.01 | 0.002 | 0.005 | 0.002  | 0.015  | 0.029     | 0.883                  | 0.01 (-0.07, 0.05) | 0.002     | 0.052    | 0.008     | 0.22     | 0.960              | 0.01 (-0.03, 0.05) | 0.002     | 0.244    | 0.444              | 0.17e-03 (0.05, 0.05) |
| 3184.25   | F7       | P08709  | 211    | 0.03 | 0.01 | 0.01 | 0.01 | 0.002 | 0.005 | 0.002  | 0.015  | 0.029     | 0.883                  | 0.01 (-0.07, 0.05) | 0.002     | 0.052    | 0.008     | 0.22     | 0.960              | 0.01 (-0.03, 0.05) | 0.002     | 0.244    | 0.444              | 0.17e-03 (0.05, 0.05) |
| 2788.50   | MMF3     | P08254  | 211    | 0.03 | 0.01 | 0.01 | 0.01 | 0.002 | 0.005 | 0.002  | 0.015  | 0.029     | 0.883                  | 0.01 (-0.07, 0.05) | 0.002     | 0.052    | 0.008     | 0.22     | 0.960              | 0.01 (-0.03, 0.05) | 0.002     | 0.244    | 0.444              | 0.17e-03 (0.05, 0.05) |
| 10514.5   | TRIO1    | OR6U98  | 211    | 0.03 | 0.01 | 0.01 | 0.01 | 0.002 | 0.005 | 0.002  | 0.015  | 0.029     | 0.883                  | 0.01 (-0.07, 0.05) | 0.002     | 0.052    | 0.008     | 0.22     | 0.960              | 0.01 (-0.03, 0.05) | 0.002     | 0.244    | 0.444              | 0.17e-03 (0.05, 0.05) |
| 12821.55  | PP2R1A   | P03253  | 211    | 0.03 | 0.01 | 0.01 | 0.01 | 0.002 | 0.005 | 0.002  | 0.015  | 0.029     | 0.883                  | 0.01 (-0.07, 0.05) | 0.002     | 0.052    | 0.008     | 0.22     | 0.960              | 0.01 (-0.03, 0.05) | 0.002     | 0.244    | 0.444              | 0.17e-03 (0.05, 0.05) |
| 17772.1   | TGFB3L   | OR6U99  | 211    | 0.03 | 0.01 | 0.01 | 0.01 | 0.002 | 0.005 | 0.002  | 0.015  | 0.029     | 0.883                  | 0.01 (-0.07, 0.05) | 0.002     | 0.052    | 0.008     | 0.22     | 0.960              | 0.01 (-0.03, 0.05) | 0.002     | 0.244    | 0.444              | 0.17e-03 (0.05, 0.05) |
| 5764.4    | GALNT2   | Q1044.1 | 211    | 0.03 | 0.01 | 0.01 | 0.01 | 0.002 | 0.005 | 0.002  | 0.015  | 0.029     | 0.883                  | 0.01 (-0.07, 0.05) | 0.002     | 0.052    | 0.008     | 0.22     | 0.960              | 0.01 (-0.03, 0.05) | 0.002     | 0.244    | 0.444              | 0.17e-03 (0.05, 0.05) |
| 7121.2    | RNASEH2B | OR6U93  | 211    | 0.03 | 0.01 | 0.01 | 0.01 | 0.002 | 0.005 | 0.002  | 0.015  | 0.029     | 0.883                  | 0.01 (-0.07, 0.05) | 0.002     | 0.052    | 0.008     | 0.22     | 0.960              | 0.01 (-0.03, 0.05) | 0.002     | 0.244    | 0.444              | 0.17e-03 (0.05, 0.05) |
| 14178.18  | CDKN3    | P19687  | 211    | 0.03 | 0.01 | 0.01 | 0.01 | 0.002 | 0.005 | 0.002  | 0.015  | 0.029     | 0.883                  | 0.01 (-0.07, 0.05) | 0.002     | 0.052    | 0.008     | 0.22     | 0.960              | 0.01 (-0.03, 0.05) | 0.002     | 0.244    | 0.444              | 0.17e-03 (0.05, 0.05) |
| 8299.86   | LRRA4    | P59901  | 211    | 0.03 | 0.01 | 0.01 | 0.01 | 0.002 | 0.005 | 0.002  | 0.015  | 0.029     | 0.883                  | 0.01 (-0.07, 0.05) | 0.002     | 0.052    | 0.008     | 0.22     | 0.960              | 0.01 (-0.03, 0.05) | 0.002     | 0.244    | 0.444              | 0.17e-03 (0.05, 0.05) |
| 10643.16  | CLRM3    | OR6P87  | 211    | 0.03 | 0.01 | 0.01 | 0.01 | 0.002 | 0.005 | 0.002  | 0.015  | 0.029     | 0.883                  | 0.01 (-0.07, 0.05) | 0.002     | 0.052    | 0.008     | 0.22     | 0.960              | 0.01 (-0.03, 0.05) | 0.002     | 0.244    | 0.444              | 0.17e-03 (0.05, 0.05) |
| 1027.40   | FNB1     | OR6U99  | 211    | 0.03 | 0.01 | 0.01 | 0.01 | 0.002 | 0.005 | 0.002  | 0.015  | 0.029     | 0.883                  | 0.01 (-0.07, 0.05) | 0.002     | 0.052    | 0.008     | 0.22     | 0.960              | 0.01 (-0.03, 0.05) | 0.002     | 0.244    | 0.444              | 0.17e-03 (0.05, 0.05) |
| 16770.3   | REG1B    | P48304  | 211    | 0.03 | 0.01 | 0.01 | 0.01 | 0.002 | 0.005 | 0.002  | 0.015  | 0.029     | 0.883                  | 0.01 (-0.07, 0.05) | 0.002     | 0.052    | 0.008     | 0.22     | 0.960              | 0.01 (-0.03, 0.05) | 0.002     | 0.244    | 0.444              | 0.17e-03 (0.05, 0.05) |
| 11239.49  | TPRSS3   | OR6U99  | 211    | 0.03 | 0.01 | 0.01 | 0.01 | 0.002 | 0.005 | 0.002  | 0.015  | 0.029     | 0.883                  | 0.01 (-0.07, 0.05) | 0.002     | 0.052    | 0.008     | 0.22     | 0.960              | 0.01 (-0.03, 0.05) | 0.002     | 0.244    | 0.444              | 0.17e-03 (0.05, 0.05) |
| 13990.1   | PI11488  | OR6U99  | 211    | 0.03 | 0.01 | 0.01 | 0.01 | 0.002 | 0.005 | 0.002  | 0.015  | 0.029     | 0.883                  | 0.01 (-0.07, 0.05) | 0.002     | 0.052    | 0.008     | 0.22     | 0.960              | 0.01 (-0.03, 0.05) | 0.002     | 0.244    | 0.444              | 0.17e-03 (0.05, 0.05) |
| 7045.4    | BNP3     | Q12983  | 211    | 0.03 | 0.01 | 0.01 | 0.01 | 0.002 | 0.005 | 0.002  | 0.015  | 0.029     | 0.883                  | 0.01 (-0.07, 0.05) | 0.002     | 0.052    | 0.008     | 0.22     | 0.960              | 0.01 (-0.03, 0.05) | 0.002     | 0.244    | 0.444              | 0.17e-03 (0.05, 0.05) |
| 878.6     | FAM171B  | OR6P85  | 211    | 0.03 | 0.01 | 0.01 | 0.01 | 0.002 | 0.005 | 0.002  | 0.015  | 0.029     | 0.883                  | 0.01 (-0.07, 0.05) | 0.002     | 0.052    | 0.008     | 0.22     | 0.960              | 0.01 (-0.03, 0.05) | 0.002     | 0.244    | 0.444              | 0.17e-03 (0.05, 0.05) |
| 8918.23   | CALB1    | P05937  | 211    | 0.03 | 0.01 | 0.01 | 0.01 | 0.002 | 0.005 | 0.002  | 0.015  | 0.029     | 0.883                  | 0.01 (-0.07, 0.05) | 0.002     | 0.052    | 0.008     | 0.22     | 0.960              | 0.01 (-0.03, 0.05) | 0.002     | 0.244    | 0.444              | 0.17e-03 (0.05, 0.05) |
| 15427.16  | LRP11    | OR6U99  | 211    | 0.03 | 0.01 | 0.01 | 0.01 | 0.002 | 0.005 | 0.002  | 0.015  | 0.029     | 0.883                  | 0.01 (-0.07, 0.05) | 0.002     | 0.052    | 0.008     | 0.22     | 0.960              | 0.01 (-0.03, 0.05) | 0.002     | 0.244    | 0.444              | 0.                    |





Table S3. Association of type 2 diabetes with deCODE plasma protein

| Gene      | Chr      | Gene      | Uniprot | nsnp  | Inverse variance weights |       |                         |        | MR Egger  |        |       |       | Weighted median          |        |          |            | Weighted mode |           |                    |        |        |           |                        |
|-----------|----------|-----------|---------|-------|--------------------------|-------|-------------------------|--------|-----------|--------|-------|-------|--------------------------|--------|----------|------------|---------------|-----------|--------------------|--------|--------|-----------|------------------------|
|           |          |           |         |       | b/w                      | se/bw | pval/iv                 | CI_low | FDR_low   | Q_val  | b/w   | se/bw | pval/eg                  | CI_low | egger    | interegger | pval/median   | se/median | pval/median        | CI_low | b_mode | se/median | pval/mode              |
| 15446_25  | NR1G1    | CD2207    | 21      | 0.029 | 0.015                    | 0.050 | 0.033 (4.77e-05)        | 0.263  | 1.54E-07  | 0.008  | 0.029 | 0.774 | 0.011 (0.05, 0.07)       | 0.001  | 0.417    | -0.009     | 0.202         | 0.654     | -0.01 (0.05, 0.03) | -0.012 | 0.024  | 0.618     | -0.01 (0.06, 0.04)     |
| 15453_48  | KRDL3    | LOC101928 | 21      | 0.028 | 0.015                    | 0.050 | 0.031 (4.12e-05)        | 0.263  | 1.54E-07  | 0.008  | 0.029 | 0.774 | 0.011 (0.05, 0.07)       | 0.001  | 0.417    | -0.009     | 0.202         | 0.654     | -0.01 (0.05, 0.03) | -0.012 | 0.024  | 0.618     | -0.01 (0.06, 0.04)     |
| 8719_145  | UMK16    | PLS112    | 21      | 0.023 | 0.012                    | 0.050 | 0.032 (3.81e-05)        | 0.253  | 1.48E-07  | 0.008  | 0.029 | 0.774 | 0.011 (0.05, 0.07)       | 0.001  | 0.417    | -0.009     | 0.202         | 0.654     | -0.01 (0.05, 0.03) | -0.012 | 0.024  | 0.618     | -0.01 (0.06, 0.04)     |
| 12515_45  | LMP2     | OR2K2     | 21      | 0.023 | 0.012                    | 0.050 | 0.033 (2.89e-05)        | 0.253  | 1.48E-07  | 0.008  | 0.029 | 0.774 | 0.011 (0.05, 0.07)       | 0.001  | 0.417    | -0.009     | 0.202         | 0.654     | -0.01 (0.05, 0.03) | -0.012 | 0.024  | 0.618     | -0.01 (0.06, 0.04)     |
| 8659_6    | PNAP     | LOC101928 | 21      | 0.023 | 0.012                    | 0.050 | 0.033 (2.89e-05)        | 0.253  | 1.48E-07  | 0.008  | 0.029 | 0.774 | 0.011 (0.05, 0.07)       | 0.001  | 0.417    | -0.009     | 0.202         | 0.654     | -0.01 (0.05, 0.03) | -0.012 | 0.024  | 0.618     | -0.01 (0.06, 0.04)     |
| 5648_28   | CTRB2    | OGK1P1    | 21      | 0.182 | 0.093                    | 0.050 | 0.181 (1.87e-04, 0.36)  | 0.255  | 0.005E+00 | 0.405  | 0.183 | 0.024 | 0.681 (0.41, 0.95, 0.78) | 0.014  | 1.160    | 0.054      | 0.202         | 0.654     | 0.07 (0.05, 0.09)  | 0.058  | 0.022  | 0.101     | 0.08 (0.01, 0.14)      |
| 10771_9   | TAXBP1   | LOC101928 | 21      | 0.023 | 0.012                    | 0.050 | 0.033 (2.89e-05)        | 0.253  | 1.48E-07  | 0.008  | 0.029 | 0.774 | 0.011 (0.05, 0.07)       | 0.001  | 0.417    | -0.009     | 0.202         | 0.654     | -0.01 (0.05, 0.03) | -0.012 | 0.024  | 0.618     | -0.01 (0.06, 0.04)     |
| 17557_33  | SEPC3    | GHSD4D    | 21      | 0.023 | 0.012                    | 0.050 | 0.032 (3.85e-05)        | 0.255  | 1.70E-04  | 0.014  | 0.024 | 0.565 | 0.01 (0.06, 0.03)        | 0.012  | 0.774    | -0.007     | 0.202         | 0.724     | -0.01 (0.05, 0.03) | -0.011 | 0.025  | 0.668     | -0.01 (0.06, 0.04)     |
| 8472_40   | PML2     | PA4967    | 21      | 0.029 | 0.015                    | 0.050 | 0.033 (4.63e-05)        | 0.265  | 1.22E+05  | 0.072  | 0.029 | 0.913 | 0.027 (0.03, 0.12)       | 0.003  | 0.880    | 0.027      | 0.202         | 0.654     | 0.01 (0.05, 0.03)  | 0.040  | 0.024  | 0.096     | 0.04 (0.01, 0.09)      |
| 19177_7   | MORC1    | LOC101928 | 21      | 0.023 | 0.012                    | 0.050 | 0.033 (2.89e-05)        | 0.253  | 1.48E-07  | 0.008  | 0.029 | 0.774 | 0.011 (0.05, 0.07)       | 0.001  | 0.417    | -0.009     | 0.202         | 0.654     | -0.01 (0.05, 0.03) | -0.012 | 0.024  | 0.618     | -0.01 (0.06, 0.04)     |
| 13813_23  | AKS      | OR5K9K    | 21      | 0.023 | 0.012                    | 0.050 | 0.032 (1.10e-04)        | 0.257  | 1.81E-01  | 0.021  | 0.024 | 0.639 | 0.01 (0.06, 0.04)        | 0.012  | 0.101    | 0.021      | 0.202         | 0.654     | 0.03 (0.02, 0.08)  | 0.027  | 0.023  | 0.241     | 0.03 (0.02, 0.07)      |
| 15303_200 | EDN3     | PA1438    | 21      | 0.023 | 0.012                    | 0.050 | 0.033 (1.03e-04)        | 0.257  | 1.57E-04  | 0.028  | 0.027 | 0.162 | 0.04 (0.09, 0.01)        | 0.004  | 0.006    | -0.007     | 0.202         | 0.654     | -0.01 (0.05, 0.03) | -0.012 | 0.024  | 0.618     | -0.01 (0.06, 0.04)     |
| 17350_13  | CHMP2B   | LOC101928 | 21      | 0.023 | 0.012                    | 0.050 | 0.033 (2.89e-05)        | 0.253  | 1.48E-07  | 0.008  | 0.029 | 0.774 | 0.011 (0.05, 0.07)       | 0.001  | 0.417    | -0.009     | 0.202         | 0.654     | -0.01 (0.05, 0.03) | -0.012 | 0.024  | 0.618     | -0.01 (0.06, 0.04)     |
| 4283_3    | RAN      | PE2826    | 21      | 0.023 | 0.012                    | 0.050 | 0.033 (2.89e-05)        | 0.253  | 1.48E-07  | 0.008  | 0.029 | 0.774 | 0.011 (0.05, 0.07)       | 0.001  | 0.417    | -0.009     | 0.202         | 0.654     | -0.01 (0.05, 0.03) | -0.012 | 0.024  | 0.618     | -0.01 (0.06, 0.04)     |
| 4217_49   | HSD17B10 | LOC101928 | 21      | 0.023 | 0.012                    | 0.050 | 0.033 (2.89e-05)        | 0.253  | 1.48E-07  | 0.008  | 0.029 | 0.774 | 0.011 (0.05, 0.07)       | 0.001  | 0.417    | -0.009     | 0.202         | 0.654     | -0.01 (0.05, 0.03) | -0.012 | 0.024  | 0.618     | -0.01 (0.06, 0.04)     |
| 3302_58   | CST7     | OR7098    | 21      | 0.026 | 0.013                    | 0.051 | 0.033 (1.37e-04)        | 0.257  | 0.007     | 0.055  | 0.028 | 0.304 | -0.08 (0.11, -4.53e-03)  | 0.005  | 3.33E-04 | 0.018      | 0.202         | 0.654     | 0.02 (0.02, 0.08)  | -0.050 | 0.026  | 0.855     | -0.05 (0.10, 1.83e-04) |
| 14128_121 | FNX10    | PO1566    | 21      | 0.023 | 0.012                    | 0.050 | 0.032 (1.32e-04)        | 0.258  | 0.091     | 0.018  | 0.025 | 0.482 | -0.02 (0.07, 0.03)       | 0.003  | 0.058    | 0.001      | 0.202         | 0.654     | 0.01 (0.05, 0.03)  | 0.005  | 0.024  | 0.832     | 0.01 (0.01, 0.04)      |
| 8532_1    | ENTPF8   | PT5354    | 21      | 0.023 | 0.012                    | 0.050 | 0.033 (2.89e-05)        | 0.253  | 1.48E-07  | 0.008  | 0.029 | 0.774 | 0.011 (0.05, 0.07)       | 0.001  | 0.417    | -0.009     | 0.202         | 0.654     | -0.01 (0.05, 0.03) | -0.012 | 0.024  | 0.618     | -0.01 (0.06, 0.04)     |
| 2615_80   | EFNA5    | PS2803    | 21      | 0.028 | 0.014                    | 0.051 | 0.033 (1.76e-04)        | 0.266  | 2.87E-04  | 0.017  | 0.029 | 0.555 | 0.02 (0.04, 0.07)        | 0.001  | 0.672    | 0.000      | 0.202         | 0.654     | 0.02 (0.02, 0.08)  | 0.001  | 0.026  | 0.993     | 0.02 (0.04, 0.05)      |
| 13116_25  | CD177    | OR8N03    | 21      | 0.022 | 0.011                    | 0.050 | 0.032 (1.45e-04)        | 0.258  | 0.036     | 0.035  | 0.022 | 0.110 | 0.04 (0.09, 0.01)        | -0.001 | 0.471    | 0.000      | 0.202         | 0.654     | -0.01 (0.05, 0.03) | -0.012 | 0.024  | 0.618     | -0.01 (0.06, 0.04)     |
| 1659_11   | TRH      | PO3389    | 21      | 0.024 | 0.013                    | 0.052 | 0.032 (1.17e-04)        | 0.265  | 0.040     | 0.025  | 0.024 | 0.025 | 0.02 (0.07, 0.02)        | 0.003  | 0.005    | 0.004      | 0.202         | 0.654     | 0.01 (0.05, 0.03)  | 0.004  | 0.024  | 0.866     | 0.03 (0.04, 0.05)      |
| 11122_97  | SPG21    | OR8N2D    | 21      | 0.023 | 0.012                    | 0.050 | 0.032 (0.95, 1.84e-04)  | 0.259  | 0.228     | 0.068  | 0.024 | 0.047 | 0.07 (0.11, -0.02)       | 0.003  | 0.026    | -0.044     | 0.202         | 0.654     | -0.01 (0.05, 0.03) | -0.012 | 0.024  | 0.618     | -0.01 (0.06, 0.04)     |
| 14709_59  | CDC      | PO3389    | 21      | 0.023 | 0.012                    | 0.050 | 0.032 (2.02e-04)        | 0.260  | 0.065     | 0.025  | 0.025 | 0.331 | -0.02 (0.07, 0.02)       | 0.003  | 0.029    | 0.172      | 0.202         | 0.654     | 0.01 (0.05, 0.03)  | 0.018  | 0.023  | 0.438     | 0.02 (0.02, 0.03)      |
| 9565_80   | CLMP     | OR9H84    | 21      | 0.023 | 0.012                    | 0.050 | 0.032 (2.07e-04)        | 0.260  | 0.275     | 0.025  | 0.024 | 0.292 | -0.03 (0.07, 0.02)       | 0.003  | 0.021    | 0.003      | 0.202         | 0.654     | 0.01 (0.05, 0.03)  | -0.003 | 0.024  | 0.899     | -0.01 (0.03, 0.27e-03) |
| 7196_21   | FNW1     | PO5001    | 21      | 0.022 | 0.011                    | 0.050 | 0.032 (2.13e-04)        | 0.260  | 0.113     | 0.045  | 0.023 | 0.056 | 0.04 (0.09, 0.17e-04)    | 0.004  | 0.001    | -0.003     | 0.202         | 0.654     | -0.01 (0.05, 0.03) | -0.012 | 0.024  | 0.618     | -0.01 (0.06, 0.04)     |
| 16540_38  | OPR12    | PA7874    | 21      | 0.022 | 0.011                    | 0.050 | 0.032 (2.58e-04)        | 0.262  | 0.144     | 0.021  | 0.023 | 0.036 | 0.04 (0.09, 0.17e-04)    | 0.004  | 0.001    | -0.003     | 0.202         | 0.654     | -0.01 (0.05, 0.03) | -0.012 | 0.024  | 0.618     | -0.01 (0.06, 0.04)     |
| 12766_33  | GPR142   | PO7501    | 21      | 0.022 | 0.011                    | 0.050 | 0.032 (2.58e-04)        | 0.262  | 0.144     | 0.021  | 0.023 | 0.036 | 0.04 (0.09, 0.17e-04)    | 0.004  | 0.001    | -0.003     | 0.202         | 0.654     | -0.01 (0.05, 0.03) | -0.012 | 0.024  | 0.618     | -0.01 (0.06, 0.04)     |
| 16010_19  | GPI1     | PA2286    | 21      | 0.028 | 0.014                    | 0.053 | 0.033 (3.49e-04)        | 0.263  | 3.54E+05  | -0.052 | 0.028 | 0.182 | -0.04 (0.11, 2.35e-03)   | 0.005  | 0.001    | 0.009      | 0.202         | 0.654     | -0.01 (0.05, 0.03) | 0.008  | 0.024  | 0.810     | 0.01 (0.04, 0.05)      |
| 10036_6   | DUSP4    | PO3389    | 21      | 0.024 | 0.013                    | 0.052 | 0.032 (3.59e-04)        | 0.264  | 0.204     | 0.039  | 0.024 | 0.039 | 0.01 (0.06, 0.04)        | 0.004  | 0.003    | 0.001      | 0.202         | 0.654     | -0.01 (0.05, 0.03) | -0.012 | 0.024  | 0.618     | -0.01 (0.06, 0.04)     |
| 18236_3   | HSP190   | OS3ZC6    | 21      | 0.023 | 0.012                    | 0.050 | 0.033 (3.05e-04)        | 0.264  | 0.055     | 0.039  | 0.028 | 0.130 | -0.02 (0.09, 0.01)       | 0.001  | 0.476    | -0.056     | 0.202         | 0.654     | -0.01 (0.05, 0.03) | -0.012 | 0.024  | 0.618     | -0.01 (0.06, 0.04)     |
| 10921_2   | SPG21    | OR8N2D    | 21      | 0.023 | 0.012                    | 0.050 | 0.033 (3.05e-04)        | 0.264  | 0.055     | 0.039  | 0.028 | 0.130 | -0.02 (0.09, 0.01)       | 0.001  | 0.476    | -0.056     | 0.202         | 0.654     | -0.01 (0.05, 0.03) | -0.012 | 0.024  | 0.618     | -0.01 (0.06, 0.04)     |
| 14623_26  | SUMO3    | PS5584    | 21      | 0.023 | 0.012                    | 0.050 | 0.032 (0.05, 0.331e-04) | 0.264  | 0.095     | 0.045  | 0.025 | 0.075 | -0.05 (0.09, 3.80e-03)   | 0.001  | 0.302    | -0.063     | 0.202         | 0.654     | -0.01 (0.05, 0.03) | -0.012 | 0.024  | 0.618     | -0.01 (0.06, 0.04)     |
| 8993_151  | RPM2     | KA3353    | 21      | 0.023 | 0.012                    | 0.050 | 0.032 (3.38e-04)        | 0.264  | 0.044     | 0.031  | 0.021 | 0.141 | -0.03 (0.09, 0.05)       | 0.004  | 0.002    | 0.004      | 0.202         | 0.654     | -0.01 (0.05, 0.03) | 0.008  | 0.021  | 0.659     | 0.01 (0.03, 0.04)      |
| 15387_65  | EHF      | OR8N2C4   | 21      | 0.023 | 0.012                    | 0.050 | 0.032 (3.38e-04)        | 0.264  | 0.044     | 0.031  | 0.021 | 0.141 | -0.03 (0.09, 0.05)       | 0.004  | 0.002    | 0.004      | 0.202         | 0.654     | -0.01 (0.05, 0.03) | 0.008  | 0.021  | 0.659     | 0.01 (0.03, 0.04)      |
| 16756_30  | GDF7     | PT4295    | 21      | 0.022 | 0.011                    | 0.050 | 0.032 (3.51e-04)        | 0.264  | 0.344     | 0.023  | 0.023 | 0.235 | -0.02 (0.07, 0.02)       | 0.003  | 0.025    | -0.007     | 0.202         | 0.654     | -0.01 (0.05, 0.03) | -0.012 | 0.024  | 0.618     | -0.01 (0.06, 0.04)     |
| 1669_53   | MAPK     | OR1067    | 21      | 0.033 | 0.017                    | 0.054 | 0.033 (5.25e-04)        | 0.264  | 1.03E-16  | 0.040  | 0.034 | 0.325 | 0.04 (0.03, 0.11)        | 0.002  | 0.795    | 0.009      | 0.202         | 0.654     | 0.01 (0.05, 0.03)  | 0.018  | 0.027  | 0.574     | 0.02 (0.04, 0.05)      |
| 1004_15   | FRS3     | OR1067    | 21      | 0.033 | 0.017                    | 0.054 | 0.033 (5.25e-04)        | 0.264  | 1.03E-16  | 0.040  | 0.034 | 0.325 | 0.04 (0.03, 0.11)        | 0.002  | 0.795    | 0.009      | 0.202         | 0.654     | 0.01 (0.05, 0.03)  | 0.018  | 0.027  | 0.574     | 0.02 (0.04, 0.05)      |
| 7843_3    | PCPT     | OR1879    | 21      | 0.026 | 0.014                    | 0.054 | 0.033 (4.01e-04)        | 0.264  | 0.107     | 0.033  | 0.027 | 0.163 | 0.01 (0.04, 0.07)        | 0.001  | 0.561    | 0.011      | 0.202         | 0.654     | 0.01 (0.05, 0.03)  | -0.005 | 0.028  | 0.872     | -0.05 (0.10, 3.23e-03) |
| 10110_10  | RLN2     | LOC101928 | 21      | 0.023 | 0.012                    | 0.050 | 0.033 (2.89e-05)        | 0.253  | 1.48E-07  | 0.008  | 0.029 | 0.774 | 0.011 (0.05, 0.07)       | 0.001  | 0.417    | -0.009     | 0.202         | 0.654     | -0.01 (0.05, 0.03) | -0.012 | 0.024  | 0.618     | -0.01 (0.06, 0.04)     |
| 11615_16  | DAPF1    | OR9N19    | 21      | 0.023 | 0.012                    | 0.050 | 0.032 (0.05, 0.329e-04) | 0.264  | 0.140     | -0.036 | 0.025 | 0.155 | -0.04 (0.09, 0.01)       | 0.001  | 0.561    | -0.052     | 0.202         | 0.654     | -0.01 (0.05, 0.03) | -0.012 | 0.024  | 0.618     | -0.01 (0.06, 0.04)     |
| 12976_49  | SOX3B3   | OR6004    | 21      | 0.022 | 0.011                    | 0.050 | 0.032 (3.76e-04)        | 0.264  | 0.172     | -0.055 | 0.023 | 0.918 | -0.06 (0.10, -0.01)      | 0.005  | 1.48E-04 | -0.016     | 0.202         | 0.654     | -0.01 (0.05, 0.03) | -0.012 | 0.024  | 0.618     | -0.01 (0.06, 0.04)     |
| 7099_17   | GALNT1   | OR10472   | 21      | 0.022 | 0.011                    | 0.050 | 0.033 (0.03, 0.142e-04) | 0.264  | 0.055     | 0.035  | 0.025 | 0.193 | -0.01 (0.06, 0.04)       | 0.005  | 0.007    | 0.011      | 0.202         | 0.654     | -0.01 (0.05, 0.03) | 0.002  | 0.024  | 0.752     | 0.01 (0.03, 0.04)      |
| 12976_39  | SFRP1    |           |         |       |                          |       |                         |        |           |        |       |       |                          |        |          |            |               |           |                    |        |        |           |                        |



Table S3. Association of type 2 diabetes with deCODE plasma protein

| Name      | Gene     | Uniprot  | nsnp | Inverse variance weighted |       |        |        | MR Egger |       |       |       | Weighted median |            |          |        |            |            |           |             |           |          |        |         |       |       |       |       |      |
|-----------|----------|----------|------|---------------------------|-------|--------|--------|----------|-------|-------|-------|-----------------|------------|----------|--------|------------|------------|-----------|-------------|-----------|----------|--------|---------|-------|-------|-------|-------|------|
|           |          |          |      | b/w                       | se/w  | pval/w | CI_low | CI_high  | FDR_W | Q_val | egger | se_egger        | pval_egger | CI_egger | egger  | Interegger | pval_inter | se_median | pval_median | CI_median | b_median | se_md  | pval_md | CI_md |       |       |       |      |
| 12684-19  | PTPN23   | PTN23    | 211  | 0.019                     | 0.012 | 0.100  | 0.022  | -0.346   | 0.034 | 0.365 | 0.101 | 0.010           | 0.024      | 0.673    | -0.011 | 0.006      | 0.042      | 0.165     | -0.004      | 0.221     | 0.865    | -3.753 | -0.04   | 0.003 | 0.894 | 3.056 | -0.04 | 0.05 |
| 13465-5   | RCAN1    | RCAN1    | 211  | 0.020                     | 0.013 | 0.102  | 0.022  | -0.346   | 0.034 | 0.365 | 0.101 | 0.010           | 0.024      | 0.673    | -0.011 | 0.006      | 0.042      | 0.165     | -0.004      | 0.221     | 0.865    | -3.753 | -0.04   | 0.003 | 0.894 | 3.056 | -0.04 | 0.05 |
| 5488-74   | SMC2     | SMC2     | 211  | 0.020                     | 0.013 | 0.102  | 0.022  | -0.346   | 0.034 | 0.365 | 0.101 | 0.010           | 0.024      | 0.673    | -0.011 | 0.006      | 0.042      | 0.165     | -0.004      | 0.221     | 0.865    | -3.753 | -0.04   | 0.003 | 0.894 | 3.056 | -0.04 | 0.05 |
| 16335-4   | SRGAP2   | SRGAP2   | 211  | 0.020                     | 0.013 | 0.102  | 0.022  | -0.346   | 0.034 | 0.365 | 0.101 | 0.010           | 0.024      | 0.673    | -0.011 | 0.006      | 0.042      | 0.165     | -0.004      | 0.221     | 0.865    | -3.753 | -0.04   | 0.003 | 0.894 | 3.056 | -0.04 | 0.05 |
| 16335-4   | SRGAP2B  | SRGAP2B  | 211  | 0.020                     | 0.013 | 0.102  | 0.022  | -0.346   | 0.034 | 0.365 | 0.101 | 0.010           | 0.024      | 0.673    | -0.011 | 0.006      | 0.042      | 0.165     | -0.004      | 0.221     | 0.865    | -3.753 | -0.04   | 0.003 | 0.894 | 3.056 | -0.04 | 0.05 |
| 8936-7    | PMPA1    | PMPA1    | 211  | 0.019                     | 0.012 | 0.101  | 0.022  | -0.346   | 0.034 | 0.366 | 0.101 | 0.011           | 0.024      | 0.673    | -0.011 | 0.006      | 0.042      | 0.165     | -0.004      | 0.221     | 0.865    | -3.753 | -0.04   | 0.003 | 0.894 | 3.056 | -0.04 | 0.05 |
| 1641-102  | COL4A2   | COL4A2   | 211  | 0.019                     | 0.012 | 0.101  | 0.022  | -0.346   | 0.034 | 0.366 | 0.101 | 0.011           | 0.024      | 0.673    | -0.011 | 0.006      | 0.042      | 0.165     | -0.004      | 0.221     | 0.865    | -3.753 | -0.04   | 0.003 | 0.894 | 3.056 | -0.04 | 0.05 |
| 12685-16  | ILF2     | ILF2     | 211  | 0.019                     | 0.012 | 0.101  | 0.022  | -0.346   | 0.034 | 0.366 | 0.101 | 0.011           | 0.024      | 0.673    | -0.011 | 0.006      | 0.042      | 0.165     | -0.004      | 0.221     | 0.865    | -3.753 | -0.04   | 0.003 | 0.894 | 3.056 | -0.04 | 0.05 |
| 19142-39  | DNAH10   | DNAH10   | 211  | 0.022                     | 0.013 | 0.102  | 0.022  | -0.346   | 0.034 | 0.366 | 0.101 | 0.011           | 0.024      | 0.673    | -0.011 | 0.006      | 0.042      | 0.165     | -0.004      | 0.221     | 0.865    | -3.753 | -0.04   | 0.003 | 0.894 | 3.056 | -0.04 | 0.05 |
| 10381-25  | CNS1     | CNS1     | 211  | 0.019                     | 0.012 | 0.101  | 0.022  | -0.346   | 0.034 | 0.366 | 0.101 | 0.011           | 0.024      | 0.673    | -0.011 | 0.006      | 0.042      | 0.165     | -0.004      | 0.221     | 0.865    | -3.753 | -0.04   | 0.003 | 0.894 | 3.056 | -0.04 | 0.05 |
| 8858-21   | BATF3    | BATF3    | 211  | 0.019                     | 0.012 | 0.101  | 0.022  | -0.346   | 0.034 | 0.366 | 0.101 | 0.011           | 0.024      | 0.673    | -0.011 | 0.006      | 0.042      | 0.165     | -0.004      | 0.221     | 0.865    | -3.753 | -0.04   | 0.003 | 0.894 | 3.056 | -0.04 | 0.05 |
| 11315-148 | PRMT10   | PRMT10   | 211  | 0.019                     | 0.012 | 0.101  | 0.022  | -0.346   | 0.034 | 0.366 | 0.101 | 0.011           | 0.024      | 0.673    | -0.011 | 0.006      | 0.042      | 0.165     | -0.004      | 0.221     | 0.865    | -3.753 | -0.04   | 0.003 | 0.894 | 3.056 | -0.04 | 0.05 |
| 11709-29  | CPT1B    | CPT1B    | 211  | 0.022                     | 0.013 | 0.102  | 0.022  | -0.346   | 0.034 | 0.366 | 0.101 | 0.011           | 0.024      | 0.673    | -0.011 | 0.006      | 0.042      | 0.165     | -0.004      | 0.221     | 0.865    | -3.753 | -0.04   | 0.003 | 0.894 | 3.056 | -0.04 | 0.05 |
| 11825-27  | PRKAG2   | PRKAG2   | 211  | 0.021                     | 0.013 | 0.103  | 0.022  | -0.346   | 0.034 | 0.368 | 0.101 | 0.011           | 0.024      | 0.673    | -0.011 | 0.006      | 0.042      | 0.165     | -0.004      | 0.221     | 0.865    | -3.753 | -0.04   | 0.003 | 0.894 | 3.056 | -0.04 | 0.05 |
| 12000-25  | USP27    | USP27    | 211  | 0.022                     | 0.013 | 0.102  | 0.022  | -0.346   | 0.034 | 0.368 | 0.101 | 0.011           | 0.024      | 0.673    | -0.011 | 0.006      | 0.042      | 0.165     | -0.004      | 0.221     | 0.865    | -3.753 | -0.04   | 0.003 | 0.894 | 3.056 | -0.04 | 0.05 |
| 12689-25  | ACT5     | ACT5     | 211  | 0.020                     | 0.012 | 0.103  | 0.022  | -0.346   | 0.034 | 0.368 | 0.101 | 0.011           | 0.024      | 0.673    | -0.011 | 0.006      | 0.042      | 0.165     | -0.004      | 0.221     | 0.865    | -3.753 | -0.04   | 0.003 | 0.894 | 3.056 | -0.04 | 0.05 |
| 17752-24  | RC2      | RC2      | 211  | 0.019                     | 0.012 | 0.102  | 0.022  | -0.346   | 0.034 | 0.368 | 0.101 | 0.011           | 0.024      | 0.673    | -0.011 | 0.006      | 0.042      | 0.165     | -0.004      | 0.221     | 0.865    | -3.753 | -0.04   | 0.003 | 0.894 | 3.056 | -0.04 | 0.05 |
| 1885-5    | KCPI1    | KCPI1    | 211  | 0.020                     | 0.012 | 0.103  | 0.022  | -0.346   | 0.034 | 0.368 | 0.101 | 0.011           | 0.024      | 0.673    | -0.011 | 0.006      | 0.042      | 0.165     | -0.004      | 0.221     | 0.865    | -3.753 | -0.04   | 0.003 | 0.894 | 3.056 | -0.04 | 0.05 |
| 8468-37   | TAC4     | TAC4     | 211  | 0.020                     | 0.013 | 0.102  | 0.022  | -0.346   | 0.034 | 0.368 | 0.101 | 0.011           | 0.024      | 0.673    | -0.011 | 0.006      | 0.042      | 0.165     | -0.004      | 0.221     | 0.865    | -3.753 | -0.04   | 0.003 | 0.894 | 3.056 | -0.04 | 0.05 |
| 9953-20   | MIR34    | MIR34    | 211  | 0.021                     | 0.013 | 0.102  | 0.022  | -0.346   | 0.034 | 0.368 | 0.101 | 0.011           | 0.024      | 0.673    | -0.011 | 0.006      | 0.042      | 0.165     | -0.004      | 0.221     | 0.865    | -3.753 | -0.04   | 0.003 | 0.894 | 3.056 | -0.04 | 0.05 |
| 7686-3    | NBR1     | NBR1     | 211  | 0.019                     | 0.012 | 0.102  | 0.022  | -0.346   | 0.034 | 0.368 | 0.101 | 0.011           | 0.024      | 0.673    | -0.011 | 0.006      | 0.042      | 0.165     | -0.004      | 0.221     | 0.865    | -3.753 | -0.04   | 0.003 | 0.894 | 3.056 | -0.04 | 0.05 |
| 9223-11   | MANF     | MANF     | 211  | 0.021                     | 0.013 | 0.102  | 0.022  | -0.346   | 0.034 | 0.368 | 0.101 | 0.011           | 0.024      | 0.673    | -0.011 | 0.006      | 0.042      | 0.165     | -0.004      | 0.221     | 0.865    | -3.753 | -0.04   | 0.003 | 0.894 | 3.056 | -0.04 | 0.05 |
| 8695-42   | AFAP1L2  | AFAP1L2  | 211  | 0.021                     | 0.013 | 0.102  | 0.022  | -0.346   | 0.034 | 0.368 | 0.101 | 0.011           | 0.024      | 0.673    | -0.011 | 0.006      | 0.042      | 0.165     | -0.004      | 0.221     | 0.865    | -3.753 | -0.04   | 0.003 | 0.894 | 3.056 | -0.04 | 0.05 |
| 8695-42   | AFAP1L1  | AFAP1L1  | 211  | 0.021                     | 0.013 | 0.102  | 0.022  | -0.346   | 0.034 | 0.368 | 0.101 | 0.011           | 0.024      | 0.673    | -0.011 | 0.006      | 0.042      | 0.165     | -0.004      | 0.221     | 0.865    | -3.753 | -0.04   | 0.003 | 0.894 | 3.056 | -0.04 | 0.05 |
| 8695-42   | KIF14    | KIF14    | 211  | 0.021                     | 0.013 | 0.102  | 0.022  | -0.346   | 0.034 | 0.368 | 0.101 | 0.011           | 0.024      | 0.673    | -0.011 | 0.006      | 0.042      | 0.165     | -0.004      | 0.221     | 0.865    | -3.753 | -0.04   | 0.003 | 0.894 | 3.056 | -0.04 | 0.05 |
| 12687-12  | SRFBP1   | SRFBP1   | 211  | 0.021                     | 0.013 | 0.103  | 0.022  | -0.346   | 0.034 | 0.368 | 0.101 | 0.011           | 0.024      | 0.673    | -0.011 | 0.006      | 0.042      | 0.165     | -0.004      | 0.221     | 0.865    | -3.753 | -0.04   | 0.003 | 0.894 | 3.056 | -0.04 | 0.05 |
| 13466-5   | NEURL4   | NEURL4   | 211  | 0.022                     | 0.014 | 0.103  | 0.022  | -0.346   | 0.034 | 0.368 | 0.101 | 0.011           | 0.024      | 0.673    | -0.011 | 0.006      | 0.042      | 0.165     | -0.004      | 0.221     | 0.865    | -3.753 | -0.04   | 0.003 | 0.894 | 3.056 | -0.04 | 0.05 |
| 1885-18   | KIF8     | KIF8     | 211  | 0.019                     | 0.012 | 0.103  | 0.022  | -0.346   | 0.034 | 0.368 | 0.101 | 0.011           | 0.024      | 0.673    | -0.011 | 0.006      | 0.042      | 0.165     | -0.004      | 0.221     | 0.865    | -3.753 | -0.04   | 0.003 | 0.894 | 3.056 | -0.04 | 0.05 |
| 10754-113 | PROCR    | PROCR    | 211  | 0.024                     | 0.014 | 0.103  | 0.022  | -0.346   | 0.034 | 0.369 | 0.101 | 0.011           | 0.024      | 0.673    | -0.011 | 0.006      | 0.042      | 0.165     | -0.004      | 0.221     | 0.865    | -3.753 | -0.04   | 0.003 | 0.894 | 3.056 | -0.04 | 0.05 |
| 7084-8    | CEACAM6  | CEACAM6  | 211  | 0.024                     | 0.014 | 0.103  | 0.022  | -0.346   | 0.034 | 0.369 | 0.101 | 0.011           | 0.024      | 0.673    | -0.011 | 0.006      | 0.042      | 0.165     | -0.004      | 0.221     | 0.865    | -3.753 | -0.04   | 0.003 | 0.894 | 3.056 | -0.04 | 0.05 |
| 15385-41  | BA3      | BA3      | 211  | 0.019                     | 0.012 | 0.104  | 0.022  | -0.346   | 0.034 | 0.371 | 0.101 | 0.011           | 0.024      | 0.673    | -0.011 | 0.006      | 0.042      | 0.165     | -0.004      | 0.221     | 0.865    | -3.753 | -0.04   | 0.003 | 0.894 | 3.056 | -0.04 | 0.05 |
| 9300-244  | PCSK2    | PCSK2    | 211  | 0.021                     | 0.013 | 0.102  | 0.022  | -0.346   | 0.034 | 0.371 | 0.101 | 0.011           | 0.024      | 0.673    | -0.011 | 0.006      | 0.042      | 0.165     | -0.004      | 0.221     | 0.865    | -3.753 | -0.04   | 0.003 | 0.894 | 3.056 | -0.04 | 0.05 |
| 5613-75   | LCC2     | LCC2     | 211  | 0.019                     | 0.012 | 0.104  | 0.022  | -0.346   | 0.034 | 0.372 | 0.101 | 0.011           | 0.024      | 0.673    | -0.011 | 0.006      | 0.042      | 0.165     | -0.004      | 0.221     | 0.865    | -3.753 | -0.04   | 0.003 | 0.894 | 3.056 | -0.04 | 0.05 |
| 12788-6   | CATD     | CATD     | 211  | 0.019                     | 0.012 | 0.104  | 0.022  | -0.346   | 0.034 | 0.372 | 0.101 | 0.011           | 0.024      | 0.673    | -0.011 | 0.006      | 0.042      | 0.165     | -0.004      | 0.221     | 0.865    | -3.753 | -0.04   | 0.003 | 0.894 | 3.056 | -0.04 | 0.05 |
| 18977-28  | BARH1    | BARH1    | 211  | 0.021                     | 0.013 | 0.102  | 0.022  | -0.346   | 0.034 | 0.372 | 0.101 | 0.011           | 0.024      | 0.673    | -0.011 | 0.006      | 0.042      | 0.165     | -0.004      | 0.221     | 0.865    | -3.753 | -0.04   | 0.003 | 0.894 | 3.056 | -0.04 | 0.05 |
| 11352-24  | ORG2     | ORG2     | 211  | 0.019                     | 0.012 | 0.105  | 0.022  | -0.346   | 0.034 | 0.372 | 0.101 | 0.011           | 0.024      | 0.673    | -0.011 | 0.006      | 0.042      | 0.165     | -0.004      | 0.221     | 0.865    | -3.753 | -0.04   | 0.003 | 0.894 | 3.056 | -0.04 | 0.05 |
| 7865-15   | TM2A     | TM2A     | 211  | 0.021                     | 0.013 | 0.105  | 0.022  | -0.346   | 0.034 | 0.373 | 0.101 | 0.011           | 0.024      | 0.673    | -0.011 | 0.006      | 0.042      | 0.165     | -0.004      | 0.221     | 0.865    | -3.753 | -0.04   | 0.003 | 0.894 | 3.056 | -0.04 | 0.05 |
| 603-64    | TM2B3    | TM2B3    | 211  | 0.021                     | 0.013 | 0.105  | 0.022  | -0.346   | 0.034 | 0.373 | 0.101 | 0.011           | 0.024      | 0.673    | -0.011 | 0.006      | 0.042      | 0.165     | -0.004      | 0.221     | 0.865    | -3.753 | -0.04   | 0.003 | 0.894 | 3.056 | -0.04 | 0.05 |
| 13812-58  | HNFRNP3  | HNFRNP3  | 211  | 0.019                     | 0.012 | 0.105  | 0.022  | -0.346   | 0.034 | 0.374 | 0.101 | 0.011           | 0.024      | 0.673    | -0.011 | 0.006      | 0.042      | 0.165     | -0.004      | 0.221     | 0.865    | -3.753 | -0.04   | 0.003 | 0.894 | 3.056 | -0.04 | 0.05 |
| 16975-6   | EPOR     | EPOR     | 211  | 0.021                     | 0.013 | 0.102  | 0.022  | -0.346   | 0.034 | 0.374 | 0.101 | 0.011           | 0.024      | 0.673    | -0.011 | 0.006      | 0.042      | 0.165     | -0.004      | 0.221     | 0.865    | -3.753 | -0.04   | 0.003 | 0.894 | 3.056 | -0.04 | 0.05 |
| 8304-50   | TM2B3    | TM2B3    | 211  | 0.024                     | 0.015 | 0.105  | 0.022  | -0.346   | 0.034 | 0.374 | 0.101 | 0.011           | 0.024      | 0.673    | -0.011 | 0.006      | 0.042      | 0.165     | -0.004      | 0.221     | 0.865    | -3.753 | -0.04   | 0.003 | 0.894 | 3.056 | -0.04 | 0.05 |
| 14123-34  | C10orf46 | C10orf46 | 211  | 0.019                     | 0.012 | 0.106  | 0.022  | -0.346   | 0.034 | 0.374 | 0.101 | 0.011           | 0.024      | 0.673    | -0.011 | 0.006      | 0.042      | 0.165     | -0.004      |           |          |        |         |       |       |       |       |      |



Table S3. Association of type 2 diabetes with deCODE plasma protein

| SNP/LogIC | Gene     | Uniprot | nsnp | Inverse variance weighted |       |        |                  | MR Egger |       |        |           | Weighted mode |                        |       |            | Weighted mode |          |            |                      |        |         |           |                      |
|-----------|----------|---------|------|---------------------------|-------|--------|------------------|----------|-------|--------|-----------|---------------|------------------------|-------|------------|---------------|----------|------------|----------------------|--------|---------|-----------|----------------------|
|           |          |         |      | b/w                       | se/w  | pval/w | CI_low           | FOR_low  | Q_val | begger | se_begger | pval_begger   | CI_low                 | egger | Interegger | pval/inter    | se/inter | pval/inter | CI_low               | b/mode | se/mode | pval/mode | CI_low               |
| 7064_2    | VAMPB    | PR040   | 211  | 0.018                     | 0.013 | 0.158  | -0.02(0.01,0.04) | 0.446    | 0.203 | 0.049  | 0.025     | 0.051         | -0.05(0.10, -1.22e-06) | 0.004 | 0.002      | 0.005         | 0.022    | 0.833      | -3.56(0.45,0.05,0.1) | 0.002  | 0.024   | 0.833     | 1.99(0.33,0.04,0.05) |
| 7033_125  | RFCG     | Q96444  | 211  | 0.003                     | 0.002 | 0.157  | -0.02(0.01,0.04) | 0.446    | 0.203 | 0.049  | 0.025     | 0.051         | -0.05(0.10, -1.22e-06) | 0.004 | 0.002      | 0.005         | 0.022    | 0.833      | -3.56(0.45,0.05,0.1) | 0.002  | 0.024   | 0.833     | 1.99(0.33,0.04,0.05) |
| 8535_102  | DMN      | Q9EDU4  | 211  | 0.017                     | 0.012 | 0.157  | -0.02(0.01,0.04) | 0.446    | 0.203 | 0.049  | 0.025     | 0.051         | -0.05(0.10, -1.22e-06) | 0.004 | 0.002      | 0.005         | 0.022    | 0.833      | -3.56(0.45,0.05,0.1) | 0.002  | 0.024   | 0.833     | 1.99(0.33,0.04,0.05) |
| 9638_148  | TRAP     | P58753  | 211  | 0.017                     | 0.012 | 0.157  | -0.02(0.01,0.04) | 0.446    | 0.203 | 0.049  | 0.025     | 0.051         | -0.05(0.10, -1.22e-06) | 0.004 | 0.002      | 0.005         | 0.022    | 0.833      | -3.56(0.45,0.05,0.1) | 0.002  | 0.024   | 0.833     | 1.99(0.33,0.04,0.05) |
| 8644_138  | ACTN2    | Q96444  | 211  | 0.003                     | 0.002 | 0.157  | -0.02(0.01,0.04) | 0.446    | 0.203 | 0.049  | 0.025     | 0.051         | -0.05(0.10, -1.22e-06) | 0.004 | 0.002      | 0.005         | 0.022    | 0.833      | -3.56(0.45,0.05,0.1) | 0.002  | 0.024   | 0.833     | 1.99(0.33,0.04,0.05) |
| 11383_58  | AQP4     | P55687  | 211  | 0.018                     | 0.013 | 0.158  | -0.02(0.01,0.04) | 0.447    | 0.204 | 0.050  | 0.026     | 0.052         | -0.06(0.11, -0.001)    | 0.003 | 0.003      | 0.004         | 0.023    | 0.834      | -3.56(0.45,0.05,0.1) | 0.002  | 0.024   | 0.833     | 1.99(0.33,0.04,0.05) |
| 16395_23  | ZWNT1    | Q96444  | 211  | 0.003                     | 0.002 | 0.157  | -0.02(0.01,0.04) | 0.446    | 0.203 | 0.049  | 0.025     | 0.051         | -0.05(0.10, -1.22e-06) | 0.004 | 0.002      | 0.005         | 0.022    | 0.833      | -3.56(0.45,0.05,0.1) | 0.002  | 0.024   | 0.833     | 1.99(0.33,0.04,0.05) |
| 7991_24   | FUT9     | Q9Y231  | 211  | 0.018                     | 0.013 | 0.158  | -0.02(0.01,0.04) | 0.447    | 0.204 | 0.050  | 0.026     | 0.052         | -0.06(0.11, -0.001)    | 0.003 | 0.003      | 0.004         | 0.023    | 0.834      | -3.56(0.45,0.05,0.1) | 0.002  | 0.024   | 0.833     | 1.99(0.33,0.04,0.05) |
| 11684_32  | FRZB     | Q96444  | 211  | 0.003                     | 0.002 | 0.157  | -0.02(0.01,0.04) | 0.446    | 0.203 | 0.049  | 0.025     | 0.051         | -0.05(0.10, -1.22e-06) | 0.004 | 0.002      | 0.005         | 0.022    | 0.833      | -3.56(0.45,0.05,0.1) | 0.002  | 0.024   | 0.833     | 1.99(0.33,0.04,0.05) |
| 12070_35  | STAL2    | Q96444  | 211  | 0.003                     | 0.002 | 0.157  | -0.02(0.01,0.04) | 0.446    | 0.203 | 0.049  | 0.025     | 0.051         | -0.05(0.10, -1.22e-06) | 0.004 | 0.002      | 0.005         | 0.022    | 0.833      | -3.56(0.45,0.05,0.1) | 0.002  | 0.024   | 0.833     | 1.99(0.33,0.04,0.05) |
| 13740_51  | FRZB     | Q96444  | 211  | 0.003                     | 0.002 | 0.157  | -0.02(0.01,0.04) | 0.446    | 0.203 | 0.049  | 0.025     | 0.051         | -0.05(0.10, -1.22e-06) | 0.004 | 0.002      | 0.005         | 0.022    | 0.833      | -3.56(0.45,0.05,0.1) | 0.002  | 0.024   | 0.833     | 1.99(0.33,0.04,0.05) |
| 14058_4   | CGA      | Q12015  | 211  | 0.016                     | 0.011 | 0.159  | -0.02(0.01,0.04) | 0.447    | 0.204 | 0.050  | 0.026     | 0.052         | -0.06(0.11, -0.001)    | 0.003 | 0.003      | 0.004         | 0.023    | 0.834      | -3.56(0.45,0.05,0.1) | 0.002  | 0.024   | 0.833     | 1.99(0.33,0.04,0.05) |
| 17432_25  | HAT      | Q12015  | 211  | 0.016                     | 0.011 | 0.159  | -0.02(0.01,0.04) | 0.447    | 0.204 | 0.050  | 0.026     | 0.052         | -0.06(0.11, -0.001)    | 0.003 | 0.003      | 0.004         | 0.023    | 0.834      | -3.56(0.45,0.05,0.1) | 0.002  | 0.024   | 0.833     | 1.99(0.33,0.04,0.05) |
| 17450_51  | HARS     | Q12015  | 211  | 0.016                     | 0.011 | 0.159  | -0.02(0.01,0.04) | 0.447    | 0.204 | 0.050  | 0.026     | 0.052         | -0.06(0.11, -0.001)    | 0.003 | 0.003      | 0.004         | 0.023    | 0.834      | -3.56(0.45,0.05,0.1) | 0.002  | 0.024   | 0.833     | 1.99(0.33,0.04,0.05) |
| 18327_31  | HAT      | Q12015  | 211  | 0.016                     | 0.011 | 0.159  | -0.02(0.01,0.04) | 0.447    | 0.204 | 0.050  | 0.026     | 0.052         | -0.06(0.11, -0.001)    | 0.003 | 0.003      | 0.004         | 0.023    | 0.834      | -3.56(0.45,0.05,0.1) | 0.002  | 0.024   | 0.833     | 1.99(0.33,0.04,0.05) |
| 4359_87   | DYRK3    | Q43781  | 211  | 0.017                     | 0.012 | 0.159  | -0.02(0.01,0.04) | 0.447    | 0.204 | 0.050  | 0.026     | 0.052         | -0.06(0.11, -0.001)    | 0.003 | 0.003      | 0.004         | 0.023    | 0.834      | -3.56(0.45,0.05,0.1) | 0.002  | 0.024   | 0.833     | 1.99(0.33,0.04,0.05) |
| 5599_88   | PYX10X   | Q96444  | 211  | 0.018                     | 0.013 | 0.159  | -0.02(0.01,0.04) | 0.447    | 0.204 | 0.050  | 0.026     | 0.052         | -0.06(0.11, -0.001)    | 0.003 | 0.003      | 0.004         | 0.023    | 0.834      | -3.56(0.45,0.05,0.1) | 0.002  | 0.024   | 0.833     | 1.99(0.33,0.04,0.05) |
| 14454_17  | LITRA    | Q12015  | 211  | 0.018                     | 0.013 | 0.159  | -0.02(0.01,0.04) | 0.447    | 0.204 | 0.050  | 0.026     | 0.052         | -0.06(0.11, -0.001)    | 0.003 | 0.003      | 0.004         | 0.023    | 0.834      | -3.56(0.45,0.05,0.1) | 0.002  | 0.024   | 0.833     | 1.99(0.33,0.04,0.05) |
| 16932_5   | SULT1E1  | P48888  | 211  | 0.018                     | 0.013 | 0.160  | -0.02(0.01,0.04) | 0.448    | 0.204 | 0.051  | 0.027     | 0.053         | -0.07(0.12, -0.001)    | 0.003 | 0.004      | 0.005         | 0.024    | 0.835      | -3.56(0.45,0.05,0.1) | 0.002  | 0.024   | 0.833     | 1.99(0.33,0.04,0.05) |
| 2677_77   | MRC1     | P22887  | 211  | 0.019                     | 0.014 | 0.160  | -0.02(0.01,0.04) | 0.449    | 0.205 | 0.052  | 0.028     | 0.054         | -0.08(0.13, -0.001)    | 0.004 | 0.005      | 0.006         | 0.025    | 0.836      | -3.56(0.45,0.05,0.1) | 0.002  | 0.024   | 0.833     | 1.99(0.33,0.04,0.05) |
| 15598_17  | CLA      | Q12015  | 211  | 0.019                     | 0.014 | 0.160  | -0.02(0.01,0.04) | 0.449    | 0.205 | 0.052  | 0.028     | 0.054         | -0.08(0.13, -0.001)    | 0.004 | 0.005      | 0.006         | 0.025    | 0.836      | -3.56(0.45,0.05,0.1) | 0.002  | 0.024   | 0.833     | 1.99(0.33,0.04,0.05) |
| 7082_2    | BGN2T    | Q96444  | 211  | 0.019                     | 0.014 | 0.160  | -0.02(0.01,0.04) | 0.449    | 0.205 | 0.052  | 0.028     | 0.054         | -0.08(0.13, -0.001)    | 0.004 | 0.005      | 0.006         | 0.025    | 0.836      | -3.56(0.45,0.05,0.1) | 0.002  | 0.024   | 0.833     | 1.99(0.33,0.04,0.05) |
| 12376_85  | CDON2    | P55273  | 211  | 0.019                     | 0.014 | 0.160  | -0.02(0.01,0.04) | 0.449    | 0.205 | 0.052  | 0.028     | 0.054         | -0.08(0.13, -0.001)    | 0.004 | 0.005      | 0.006         | 0.025    | 0.836      | -3.56(0.45,0.05,0.1) | 0.002  | 0.024   | 0.833     | 1.99(0.33,0.04,0.05) |
| 12543_76  | ZNF560   | Q96444  | 211  | 0.019                     | 0.014 | 0.160  | -0.02(0.01,0.04) | 0.449    | 0.205 | 0.052  | 0.028     | 0.054         | -0.08(0.13, -0.001)    | 0.004 | 0.005      | 0.006         | 0.025    | 0.836      | -3.56(0.45,0.05,0.1) | 0.002  | 0.024   | 0.833     | 1.99(0.33,0.04,0.05) |
| 2987_37   | HIST1H1C | P18403  | 211  | 0.019                     | 0.014 | 0.160  | -0.02(0.01,0.04) | 0.449    | 0.205 | 0.052  | 0.028     | 0.054         | -0.08(0.13, -0.001)    | 0.004 | 0.005      | 0.006         | 0.025    | 0.836      | -3.56(0.45,0.05,0.1) | 0.002  | 0.024   | 0.833     | 1.99(0.33,0.04,0.05) |
| 13422_86  | ENOX2    | Q12015  | 211  | 0.019                     | 0.014 | 0.160  | -0.02(0.01,0.04) | 0.449    | 0.205 | 0.052  | 0.028     | 0.054         | -0.08(0.13, -0.001)    | 0.004 | 0.005      | 0.006         | 0.025    | 0.836      | -3.56(0.45,0.05,0.1) | 0.002  | 0.024   | 0.833     | 1.99(0.33,0.04,0.05) |
| 8775_81   | FAM24B   | Q96444  | 211  | 0.019                     | 0.014 | 0.160  | -0.02(0.01,0.04) | 0.449    | 0.205 | 0.052  | 0.028     | 0.054         | -0.08(0.13, -0.001)    | 0.004 | 0.005      | 0.006         | 0.025    | 0.836      | -3.56(0.45,0.05,0.1) | 0.002  | 0.024   | 0.833     | 1.99(0.33,0.04,0.05) |
| 11077_11  | LS       | P05133  | 211  | 0.019                     | 0.014 | 0.160  | -0.02(0.01,0.04) | 0.449    | 0.205 | 0.052  | 0.028     | 0.054         | -0.08(0.13, -0.001)    | 0.004 | 0.005      | 0.006         | 0.025    | 0.836      | -3.56(0.45,0.05,0.1) | 0.002  | 0.024   | 0.833     | 1.99(0.33,0.04,0.05) |
| 7038_54   | CSF1     | P18403  | 211  | 0.019                     | 0.014 | 0.160  | -0.02(0.01,0.04) | 0.449    | 0.205 | 0.052  | 0.028     | 0.054         | -0.08(0.13, -0.001)    | 0.004 | 0.005      | 0.006         | 0.025    | 0.836      | -3.56(0.45,0.05,0.1) | 0.002  | 0.024   | 0.833     | 1.99(0.33,0.04,0.05) |
| 4995_16   | HPGD     | P15428  | 211  | 0.019                     | 0.014 | 0.160  | -0.02(0.01,0.04) | 0.449    | 0.205 | 0.052  | 0.028     | 0.054         | -0.08(0.13, -0.001)    | 0.004 | 0.005      | 0.006         | 0.025    | 0.836      | -3.56(0.45,0.05,0.1) | 0.002  | 0.024   | 0.833     | 1.99(0.33,0.04,0.05) |
| 1492_14   | ADAM     | Q96444  | 211  | 0.019                     | 0.014 | 0.160  | -0.02(0.01,0.04) | 0.449    | 0.205 | 0.052  | 0.028     | 0.054         | -0.08(0.13, -0.001)    | 0.004 | 0.005      | 0.006         | 0.025    | 0.836      | -3.56(0.45,0.05,0.1) | 0.002  | 0.024   | 0.833     | 1.99(0.33,0.04,0.05) |
| 10618_10  | LRP2     | P98184  | 211  | 0.019                     | 0.014 | 0.160  | -0.02(0.01,0.04) | 0.449    | 0.205 | 0.052  | 0.028     | 0.054         | -0.08(0.13, -0.001)    | 0.004 | 0.005      | 0.006         | 0.025    | 0.836      | -3.56(0.45,0.05,0.1) | 0.002  | 0.024   | 0.833     | 1.99(0.33,0.04,0.05) |
| 11334_7   | LRFB3    | Q75022  | 211  | 0.019                     | 0.014 | 0.160  | -0.02(0.01,0.04) | 0.449    | 0.205 | 0.052  | 0.028     | 0.054         | -0.08(0.13, -0.001)    | 0.004 | 0.005      | 0.006         | 0.025    | 0.836      | -3.56(0.45,0.05,0.1) | 0.002  | 0.024   | 0.833     | 1.99(0.33,0.04,0.05) |
| 13554_78  | REP1     | Q96444  | 211  | 0.019                     | 0.014 | 0.160  | -0.02(0.01,0.04) | 0.449    | 0.205 | 0.052  | 0.028     | 0.054         | -0.08(0.13, -0.001)    | 0.004 | 0.005      | 0.006         | 0.025    | 0.836      | -3.56(0.45,0.05,0.1) | 0.002  | 0.024   | 0.833     | 1.99(0.33,0.04,0.05) |
| 15235_14  | GAP43    | P17677  | 211  | 0.019                     | 0.014 | 0.160  | -0.02(0.01,0.04) | 0.449    | 0.205 | 0.052  | 0.028     | 0.054         | -0.08(0.13, -0.001)    | 0.004 | 0.005      | 0.006         | 0.025    | 0.836      | -3.56(0.45,0.05,0.1) | 0.002  | 0.024   | 0.833     | 1.99(0.33,0.04,0.05) |
| 16290_16  | ANKK4    | P13873  | 211  | 0.019                     | 0.014 | 0.160  | -0.02(0.01,0.04) | 0.449    | 0.205 | 0.052  | 0.028     | 0.054         | -0.08(0.13, -0.001)    | 0.004 | 0.005      | 0.006         | 0.025    | 0.836      | -3.56(0.45,0.05,0.1) | 0.002  | 0.024   | 0.833     | 1.99(0.33,0.04,0.05) |
| 16343_4   | PTG2     | Q96444  | 211  | 0.019                     | 0.014 | 0.160  | -0.02(0.01,0.04) | 0.449    | 0.205 | 0.052  | 0.028     | 0.054         | -0.08(0.13, -0.001)    | 0.004 | 0.005      | 0.006         | 0.025    | 0.836      | -3.56(0.45,0.05,0.1) | 0.002  | 0.024   | 0.833     | 1.99(0.33,0.04,0.05) |
| 19187_21  | STAMP    | Q96444  | 211  | 0.019                     | 0.014 | 0.160  | -0.02(0.01,0.04) | 0.449    | 0.205 | 0.052  | 0.028     | 0.054         | -0.08(0.13, -0.001)    | 0.004 | 0.005      | 0.006         | 0.025    | 0.836      | -3.56(0.45,0.05,0.1) | 0.002  | 0.024   | 0.833     | 1.99(0.33,0.04,0.05) |
| 1706_25   | ZPA      | Q96444  | 211  | 0.019                     | 0.014 | 0.160  | -0.02(0.01,0.04) | 0.449    | 0.205 | 0.052  | 0.028     | 0.054         | -0.08(0.13, -0.001)    | 0.004 | 0.005      | 0.006         | 0.025    | 0.836      | -3.56(0.45,0.05,0.1) | 0.002  | 0.024   | 0.833     | 1.99(0.33,0.04,0.05) |
| 9128_34   | FLRT3    | Q96444  | 211  | 0.019                     | 0.014 | 0.160  | -0.02(0.01,0.04) | 0.449    | 0.205 | 0.052  | 0.028     | 0.054         | -0.08(0.13, -0.001)    | 0.004 | 0.005      | 0.006         | 0.025    | 0.836      | -3.56(0.45,0.05,0.1) | 0.002  | 0.024   | 0.833     | 1.99(0.33,0.04,0.05) |
| 9562_93   | SUSD1    | Q96444  | 211  | 0.019                     | 0.014 | 0.160  | -0.02(0.01,0.04) | 0.449    | 0.205 | 0.052  | 0.028     | 0.054         | -0.08(0.13, -0.001)    | 0.004 | 0.005      | 0.006         | 0.025    | 0.836      | -3.56(0.45,0.05,0.1) | 0.002  | 0.024   | 0.833     | 1.99(0.33,0.04,0.05) |
| 9504_48   | GMBR2    | Q96444  | 211  | 0.019                     | 0.014 | 0.160  |                  |          |       |        |           |               |                        |       |            |               |          |            |                      |        |         |           |                      |

Table S3. Association of type 2 diabetes with deCODE plasma protein

| Gene      | Uniprot  | nsnp    | bw | sv    | pr    | cl   | MD   | Weighted median | se       | Weighted median | se    |
|-----------|----------|---------|----|-------|-------|------|------|-----------------|----------|-----------------|-------|
| Gene      | Uniprot  | nsnp    | bw | sv    | pr    | cl   | MD   | Weighted median | se       | Weighted median | se    |
| 18074.2   | SERF2    | RA1011  | 21 | 0.015 | 0.02  | 0.01 | 0.04 | 0.482           | 0.166    | -0.039          | 0.024 |
| 18317.6   | ZAP70    | RA5403  | 21 | 0.017 | 0.02  | 0.01 | 0.04 | 0.482           | 0.166    | -0.039          | 0.024 |
| 8009.1    | THPO     | 24225   | 21 | 0.017 | 0.02  | 0.01 | 0.04 | 0.482           | 0.166    | -0.039          | 0.024 |
| 8447.73   | PTX3     | 26022   | 21 | 0.018 | 0.02  | 0.01 | 0.04 | 0.482           | 0.166    | -0.039          | 0.024 |
| 2656.53   | EDA      | 10338   | 21 | 0.018 | 0.02  | 0.01 | 0.04 | 0.482           | 0.166    | -0.039          | 0.024 |
| 19637.9   | CR1      | PO8850  | 21 | 0.015 | 0.01  | 0.01 | 0.04 | 0.484           | 0.176    | -0.015          | 0.023 |
| 10676.1   | COL1E1   | 10338   | 21 | 0.015 | 0.02  | 0.01 | 0.04 | 0.484           | 0.176    | -0.015          | 0.023 |
| 15350.5   | UTR3     | ORJUKP6 | 21 | 0.015 | 0.02  | 0.01 | 0.04 | 0.485           | 0.170    | -0.038          | 0.024 |
| 5661.15   | IL18     | IL14118 | 21 | 0.016 | 0.02  | 0.01 | 0.04 | 0.485           | 0.178    | -0.058          | 0.024 |
| 7901.38   | POTEM    | GNM7    | 21 | 0.015 | 0.02  | 0.01 | 0.04 | 0.486           | 0.170    | -0.038          | 0.024 |
| 7139.14   | SLFRK4   | ORMS2   | 21 | 0.017 | 0.03  | 0.01 | 0.04 | 0.486           | 0.208    | 0.027           | 0.033 |
| 2860.59   | CCDC28   | CNR33   | 21 | 0.019 | 0.02  | 0.01 | 0.04 | 0.486           | 0.215    | -0.118          | 0.030 |
| 12733.29  | HNRPNB   | ORF72   | 21 | 0.019 | 0.02  | 0.01 | 0.04 | 0.486           | 0.215    | -0.118          | 0.030 |
| 4965.63   | COTL1    | IL10419 | 21 | 0.023 | 0.018 | 0.01 | 0.02 | 0.486           | 0.252    | -0.016          | 0.035 |
| 10076.1   | HPA02    | CC252   | 21 | 0.012 | 0.02  | 0.01 | 0.04 | 0.486           | 0.245    | 0.024           | 0.033 |
| 5701.81   | CLEC3B   | PO5452  | 21 | 0.018 | 0.04  | 0.02 | 0.02 | 0.487           | 0.496    | 0.014           | 0.028 |
| 8941.11   | SUMF1    | ORNBK3  | 21 | 0.016 | 0.02  | 0.02 | 0.02 | 0.487           | 0.142    | -0.025          | 0.025 |
| 14002.18  | DOCK9    | ORX29   | 21 | 0.012 | 0.02  | 0.02 | 0.04 | 0.487           | 0.134    | -0.063          | 0.025 |
| 14021.81  | MED4     | ORJMK6  | 21 | 0.017 | 0.03  | 0.02 | 0.04 | 0.487           | 0.202    | -0.023          | 0.030 |
| 18174.79  | PDCD6B   | ORJMK6  | 21 | 0.015 | 0.02  | 0.03 | 0.04 | 0.488           | 0.081    | -0.041          | 0.025 |
| 7070.26   | NEL      | ORJMK6  | 21 | 0.015 | 0.02  | 0.03 | 0.04 | 0.488           | 0.222    | 0.014           | 0.024 |
| 18267.74  | CARD17   | OSXLAB  | 21 | 0.015 | 0.02  | 0.03 | 0.04 | 0.488           | 0.147    | -0.042          | 0.024 |
| 19190.42  | USEL2L   | IL14533 | 21 | 0.017 | 0.03  | 0.02 | 0.04 | 0.488           | 0.009    | -0.028          | 0.030 |
| 10022.207 | POLH     | ORJ253  | 21 | 0.015 | 0.01  | 0.04 | 0.04 | 0.488           | 0.270    | 0.015           | 0.033 |
| 15627.83  | AKT1     | ORJ253  | 21 | 0.016 | 0.02  | 0.02 | 0.04 | 0.488           | 0.079    | -0.039          | 0.025 |
| 8614.3    | SRBP1    | ORJ253  | 21 | 0.017 | 0.03  | 0.02 | 0.04 | 0.489           | 0.035    | -0.025          | 0.031 |
| 16887.76  | PCTK1    | ORJ596  | 21 | 0.016 | 0.02  | 0.04 | 0.04 | 0.490           | 0.127    | -0.010          | 0.025 |
| 10830.55  | ERHAB1   | ORJ596  | 21 | 0.012 | 0.02  | 0.04 | 0.04 | 0.490           | 0.450    | -0.033          | 0.023 |
| 12704.28  | PCSK9    | ORJ596  | 21 | 0.015 | 0.02  | 0.04 | 0.04 | 0.490           | 0.450    | -0.033          | 0.023 |
| 18874.68  | CEBPA    | PA9715  | 21 | 0.015 | 0.02  | 0.01 | 0.04 | 0.490           | 0.404    | -0.047          | 0.023 |
| 522.32    | POE1A    | ORJ596  | 21 | 0.015 | 0.02  | 0.04 | 0.04 | 0.490           | 0.404    | -0.047          | 0.023 |
| 5337.64   | CD86     | PA4201  | 21 | 0.015 | 0.02  | 0.02 | 0.04 | 0.490           | 0.429    | 0.010           | 0.024 |
| 8119.14   | MAMDC2   | QZ084   | 21 | 0.017 | 0.02  | 0.02 | 0.04 | 0.490           | 0.255    | -0.054          | 0.025 |
| 12571.14  | ARL1     | ORJ596  | 21 | 0.015 | 0.02  | 0.04 | 0.04 | 0.490           | 0.404    | -0.047          | 0.023 |
| 17356.34  | IL1F10   | ORJ596  | 21 | 0.015 | 0.02  | 0.04 | 0.04 | 0.490           | 0.123    | -0.023          | 0.024 |
| 8407.10   | RS1      | ORJ596  | 21 | 0.017 | 0.03  | 0.02 | 0.04 | 0.490           | 0.229    | -0.043          | 0.025 |
| 8002.26   | SERPINC1 | ORJ596  | 21 | 0.015 | 0.02  | 0.04 | 0.04 | 0.490           | 1.502    | -0.029          | 0.011 |
| 8927.6    | CFTR7c3  | EOCX11  | 21 | 0.015 | 0.02  | 0.02 | 0.04 | 0.491           | 0.155    | -0.011          | 0.024 |
| 8616.2    | CY14B2   | ORJ596  | 21 | 0.015 | 0.02  | 0.04 | 0.04 | 0.491           | 0.155    | -0.011          | 0.024 |
| 7071.23   | MAN1B1   | ORJMK7  | 21 | 0.017 | 0.03  | 0.02 | 0.04 | 0.492           | 0.002    | -0.058          | 0.028 |
| 11348.132 | PHAX2    | IL5480  | 21 | 0.015 | 0.02  | 0.02 | 0.04 | 0.492           | 0.744    | -0.044          | 0.024 |
| 11653.69  | SLC49A8  | ORJ596  | 21 | 0.015 | 0.02  | 0.04 | 0.04 | 0.492           | 0.002    | -0.058          | 0.028 |
| 12705.9   | IL1575   | ORJ596  | 21 | 0.015 | 0.02  | 0.04 | 0.04 | 0.493           | 0.350    | -0.044          | 0.023 |
| 12718.43  | PRNA     | ORJ253  | 21 | 0.013 | 0.02  | 0.04 | 0.04 | 0.493           | 0.044    | -0.055          | 0.026 |
| 1847.52   | CCL17    | ORJ253  | 21 | 0.017 | 0.03  | 0.02 | 0.04 | 0.494           | 0.044    | -0.055          | 0.026 |
| 18162.187 | PKA      | ORJMK7  | 21 | 0.016 | 0.03  | 0.02 | 0.04 | 0.494           | 0.044    | -0.055          | 0.026 |
| 1682.52   | CDNF     | ORJMK7  | 21 | 0.015 | 0.02  | 0.04 | 0.04 | 0.494           | 0.044    | -0.055          | 0.026 |
| 12535.2   | XCC1     | IL1887  | 21 | 0.015 | 0.02  | 0.04 | 0.04 | 0.495           | 0.608    | -0.012          | 0.023 |
| 15300.96  | PRCC14   | ORJMK7  | 21 | 0.015 | 0.02  | 0.04 | 0.04 | 0.495           | 0.229    | -0.058          | 0.025 |
| 8753.17   | EZR      | ORJ596  | 21 | 0.015 | 0.02  | 0.04 | 0.04 | 0.495           | 0.019    | -0.019          | 0.024 |
| 13573.5   | ARPC1    | IL1545  | 21 | 0.015 | 0.02  | 0.04 | 0.04 | 0.496           | 0.043    | -0.024          | 0.024 |
| 2855.49   | MAPK3    | PZ780   | 21 | 0.015 | 0.02  | 0.04 | 0.04 | 0.496           | 8.300    | -0.042          | 0.004 |
| 5405.8    | LRRC1    | ORJ596  | 21 | 0.015 | 0.02  | 0.04 | 0.04 | 0.496           | 0.058    | -0.018          | 0.024 |
| 2842.4    | PRF31A2  | ORJMK7  | 21 | 0.015 | 0.02  | 0.04 | 0.04 | 0.497           | 0.044    | -0.025          | 0.030 |
| 18302.29  | OTD2     | ORJMK7  | 21 | 0.015 | 0.02  | 0.04 | 0.04 | 0.497           | 0.044    | -0.025          | 0.030 |
| 8897.3    | LRRF32A  | ANM11   | 21 | 0.015 | 0.02  | 0.04 | 0.04 | 0.497           | 0.125    | -0.049          | 0.024 |
| 12737.18  | MMP7     | OTZ721  | 21 | 0.017 | 0.03  | 0.02 | 0.04 | 0.497           | 0.044    | -0.025          | 0.030 |
| 2627.2    | UBA      | ORJMK7  | 21 | 0.015 | 0.02  | 0.04 | 0.04 | 0.497           | 2.71E+07 | -0.028          | 0.011 |
| 8897.2    | UBA      | ORJMK7  | 21 | 0.015 | 0.02  | 0.04 | 0.04 | 0.497           | 2.71E+07 | -0.028          | 0.011 |
| 18202.22  | CD37     | PI1501  | 21 | 0.017 | 0.03  | 0.02 | 0.04 | 0.499           | 0.027    | -0.058          | 0.025 |
| 3187.70   | PEA3     | IL14735 | 21 | 0.015 | 0.02  | 0.04 | 0.04 | 0.499           | 0.095    | -0.058          | 0.025 |
| 13554.4   | GNPNA7   | ORJMK7  | 21 | 0.015 | 0.02  | 0.04 | 0.04 | 0.499           | 0.095    | -0.058          | 0.025 |
| 10086.11  | PIGFRA   | IL16234 | 21 | 0.015 | 0.02  | 0.04 | 0.04 | 0.500           | 0.310    | -0.006          | 0.024 |
| 15504.39  | BDRG1    | ORJMK7  | 21 | 0.015 | 0.02  | 0.04 | 0.04 | 0.501           | 0.259    | -0.041          | 0.024 |
| 7217.76   | UBA2     | ORJMK7  | 21 | 0.015 | 0.02  | 0.04 | 0.04 | 0.501           | 0.688    | -0.012          | 0.023 |
| 8834.58   | CANX     | PZ780   | 21 | 0.015 | 0.02  | 0.04 | 0.04 | 0.502           | 0.365    | -0.039          | 0.023 |
| 10830.55  | DEFB116  | ORJMK7  | 21 | 0.015 | 0.02  | 0.04 | 0.04 | 0.502           | 0.688    | -0.012          | 0.023 |
| 11391.69  | MIK      | ORJMK7  | 21 | 0.015 | 0.02  | 0.04 | 0.04 | 0.503           | 0.001    | -0.046          | 0.028 |
| 12963.1   | GNX17    | ORJMK7  | 21 | 0.015 | 0.02  | 0.04 | 0.04 | 0.503           | 0.707    | -0.024          | 0.023 |
| 14300.9   | HNRPNB   | ORJMK7  | 21 | 0.015 | 0.02  | 0.04 | 0.04 | 0.503           | 0.001    | -0.046          | 0.028 |
| 17835.21  | ANKRD13  | PZ7216  | 21 | 0.015 | 0.02  | 0.04 | 0.04 | 0.503           | 0.338    | -0.025          | 0.023 |
| 19141.22  | DAP      | ORJMK7  | 21 | 0.015 | 0.02  | 0.04 | 0.04 | 0.503           | 0.978    | -0.005          | 0.021 |
| 1002.13   | WDR9     | ORJMK7  | 21 | 0.015 | 0.02  | 0.04 | 0.04 | 0.503           | 0.715    | -0.005          | 0.021 |
| 4314.12   | DCTP1    | ORJMK7  | 21 | 0.015 | 0.02  | 0.04 | 0.04 | 0.503           | 0.001    | -0.046          | 0.028 |
| 10356.21  | JUN      | ORJMK7  | 21 | 0.015 | 0.02  | 0.04 | 0.04 | 0.503           | 0.001    | -0.046          | 0.028 |
| 13930.3   | APC23    | ORJMK7  | 21 | 0.015 | 0.02  | 0.04 | 0.04 | 0.503           | 0.999    | -0.041          | 0.028 |
| 4128.27   | POLR2C   | ORJMK7  | 21 | 0.015 | 0.02  | 0.04 | 0.04 | 0.503           | 0.309    | -0.042          | 0.023 |
| 5745.64   | RIS      | ORJMK7  | 21 | 0.015 | 0.02  | 0.04 | 0.04 | 0.503           | 0.309    | -0.042          | 0.023 |
| 5196.7    | NMT1     | ORJMK7  | 21 | 0.015 | 0.02  | 0.04 | 0.04 | 0.504           | 0.258    | -0.049          | 0.024 |
| 11862.7   | XNP4     | ORJMK7  | 21 | 0.015 | 0.02  | 0.04 | 0.04 | 0.505           | 0.055    | -0.049          | 0.025 |
| 12984.9   | TRNP4    | ORJMK7  | 21 | 0.015 | 0.02  | 0.04 | 0.04 | 0.505           | 0.055    | -0.049          | 0.025 |
| 14662.6   | MPF1     | ORJMK7  | 21 | 0.017 | 0.04  | 0.02 | 0.04 | 0.506           | 0.001    | -0.038          | 0.027 |
| 10356.21  | JUN      | ORJMK7  | 21 | 0.015 | 0.02  | 0.04 | 0.04 | 0.506           | 0.001    | -0.038          | 0.027 |
| 13624.17  | NADK     | ORJMK7  | 21 | 0.015 | 0.02  | 0.04 | 0.04 | 0.506           | 0.082    | -0.028          | 0.025 |
| 14687.6   | HLRC     | ORJMK7  | 21 | 0.015 | 0.02  | 0.04 | 0.04 | 0.506           | 0.033    | -0.044          | 0.024 |
| 17786.5   | GEPR1    | ORJMK7  | 21 | 0.015 | 0.02  | 0.04 | 0.04 | 0.506           | 0.033    | -0.044          | 0.024 |
| 8584.1    | HRC      | PZ3327  | 21 | 0.015 | 0.02  | 0.04 | 0.04 | 0.506           | 0.882    | -0.014          | 0.024 |
| 7855.108  | MIR4     | ORJMK7  | 21 | 0.015 | 0.02  | 0.04 | 0.04 | 0.507           | 0.001    | -0.040          | 0.025 |
| 9016.21   | ESRP1    | ORJMK7  | 21 | 0.015 | 0.02  | 0.04 | 0.04 | 0.507           | 0.001    | -0.040          | 0.025 |
| 13713.184 | SEC22A   | ORJMK7  | 21 | 0.015 | 0.02  | 0.04 | 0.04 | 0.507           | 0.157    | -0.009          | 0.024 |
| 18952.54  | PRM5A    | ORJMK7  | 21 | 0.015 | 0.02  | 0.04 | 0.04 | 0.507           | 1.800    | -0.021          | 0.011 |
|           |          |         |    |       |       |      |      |                 |          |                 |       |







Table S3. Association of type 2 diabetes with deCODE plasma protein

| SNP       | Gene     | UnP     | nsp | b/w   | se/w | pval/w | CI/w               | FDR   | Q        | pval  | MR Egger | se/egger | pval/egger             | CI/egger | egger    | Interegger | pval/inter | se/median          | pval/median            | CI/median          | b/med  | se/med             | pval/med               | CI/med             |                    |
|-----------|----------|---------|-----|-------|------|--------|--------------------|-------|----------|-------|----------|----------|------------------------|----------|----------|------------|------------|--------------------|------------------------|--------------------|--------|--------------------|------------------------|--------------------|--------------------|
| 15436_40  | RAMP1    | CG0884  | 21  | 0.012 | 0.02 | 0.303  | -0.01 (0.01, 0.03) | 0.596 | 0.779    | 0.021 | 0.024    | 0.193    | -0.03 (0.08, 0.02)     | 0.003    | 0.038    | -0.031     | 0.020      | 0.124              | -0.03 (0.07, 0.01)     | -0.031             | 0.024  | 0.211              | -0.03 (0.08, 0.02)     |                    |                    |
| 16533_68  | CFAP45   | CG1989  | 21  | 0.012 | 0.02 | 0.338  | -0.01 (0.01, 0.03) | 0.627 | 0.729    | 0.023 | 0.025    | 0.151    | -0.04 (0.08, 0.03)     | 0.003    | 0.035    | 0.022      | 0.041      | -0.03 (0.07, 0.03) | -0.029                 | 0.024              | 0.241  | -0.03 (0.07, 0.03) |                        |                    |                    |
| 18628_135 | FMT      | CG4978  | 21  | 0.012 | 0.02 | 0.303  | -0.01 (0.04, 0.01) | 0.598 | 0.335    | 0.024 | 0.024    | 0.143    | -0.04 (0.08, 0.01)     | 0.001    | 0.287    | -0.038     | 0.023      | 0.121              | -0.04 (0.08, 0.01)     | -0.027             | 0.023  | 0.246              | -0.03 (0.07, 0.02)     |                    |                    |
| 14051_54  | FOXC2    | CG4989  | 21  | 0.012 | 0.02 | 0.304  | -0.01 (0.01, 0.03) | 0.596 | 0.345    | 0.026 | 0.023    | 0.263    | -0.03 (0.07, 0.02)     | 0.002    | 0.059    | -0.011     | 0.019      | 0.181              | -0.03 (0.08, 0.03)     | -0.024             | 0.022  | 0.272              | -0.02 (0.07, 0.02)     |                    |                    |
| 12681_13  | TMC3D3   | CG2918  | 21  | 0.012 | 0.02 | 0.305  | -0.01 (0.01, 0.03) | 0.624 | 0.021    | 0.024 | 0.024    | 0.193    | -0.04 (0.08, 0.04)     | 0.002    | 0.059    | 0.024      | 0.024      | 0.181              | -0.04 (0.08, 0.04)     | -0.024             | 0.022  | 0.272              | -0.02 (0.07, 0.02)     |                    |                    |
| 8956_56   | SCARF2   | CG0826  | 21  | 0.012 | 0.02 | 0.304  | -0.01 (0.04, 0.01) | 0.596 | 0.137    | 0.001 | 0.025    | 0.088    | -0.04 (0.09, 0.05)     | 0.001    | 0.537    | -0.019     | 0.020      | 0.463              | -0.02 (0.07, 0.03)     | -0.030             | 0.024  | 0.222              | -0.03 (0.08, 0.02)     |                    |                    |
| 1170_12   | SUST1    | CG1012  | 21  | 0.012 | 0.02 | 0.305  | -0.01 (0.01, 0.03) | 0.624 | 0.021    | 0.024 | 0.024    | 0.193    | -0.04 (0.08, 0.04)     | 0.002    | 0.059    | 0.024      | 0.024      | 0.181              | -0.04 (0.08, 0.04)     | -0.024             | 0.022  | 0.272              | -0.02 (0.07, 0.02)     |                    |                    |
| 8933_84   | MEF2C    | CG0413  | 21  | 0.013 | 0.03 | 0.305  | -0.01 (0.01, 0.04) | 0.597 | 0.005    | 0.042 | 0.028    | 0.103    | -0.04 (0.09, 0.01)     | 0.003    | 0.013    | -0.010     | 0.020      | 0.543              | -0.01 (0.05, 0.03)     | -0.015             | 0.023  | 0.508              | -0.02 (0.08, 0.03)     |                    |                    |
| 15448_47  | SDSMT1   | CG13501 | 21  | 0.012 | 0.02 | 0.305  | -0.01 (0.01, 0.03) | 0.597 | 0.407    | 0.038 | 0.023    | 0.101    | -0.04 (0.08, 0.01)     | 0.003    | 0.013    | -0.009     | 0.021      | 0.646              | -0.01 (0.05, 0.03)     | -0.004             | 0.024  | 0.698              | -0.01 (0.06, 0.04)     |                    |                    |
| 17332_3   | ADPRAL1  | CG06448 | 21  | 0.012 | 0.02 | 0.307  | -0.01 (0.01, 0.04) | 0.611 | 0.021    | 0.024 | 0.024    | 0.193    | -0.04 (0.08, 0.04)     | 0.002    | 0.059    | 0.024      | 0.024      | 0.181              | -0.04 (0.08, 0.04)     | -0.024             | 0.022  | 0.272              | -0.02 (0.07, 0.02)     |                    |                    |
| 19388_2   | QSOX1    | PS5289  | 21  | 0.013 | 0.03 | 0.305  | -0.01 (0.01, 0.04) | 0.598 | 0.002    | 0.119 | 0.026    | 0.471    | -0.02 (0.07, 0.03)     | 0.002    | 0.155    | 0.004      | 0.024      | 0.870              | 0.386                  | -0.04 (0.04, 0.00) | -0.004 | 0.024              | 0.873                  | -0.384             | -0.03 (0.05, 0.04) |
| 8410_26   | NLSL4    | CG14841 | 21  | 0.012 | 0.02 | 0.308  | -0.01 (0.01, 0.04) | 0.598 | 0.002    | 0.032 | 0.026    | 0.223    | -0.03 (0.08, 0.02)     | 0.003    | 0.045    | -0.030     | 0.019      | 0.109              | -0.03 (0.08, 0.01)     | -0.036             | 0.022  | 0.111              | -0.04 (0.09, 0.01)     |                    |                    |
| 8501_4    | SC2B2A   | CG1660  | 21  | 0.012 | 0.02 | 0.308  | -0.01 (0.01, 0.04) | 0.598 | 0.002    | 0.032 | 0.026    | 0.223    | -0.03 (0.08, 0.02)     | 0.003    | 0.045    | -0.030     | 0.019      | 0.109              | -0.03 (0.08, 0.01)     | -0.036             | 0.022  | 0.111              | -0.04 (0.09, 0.01)     |                    |                    |
| 12432_23  | CACYPB   | CG0871  | 21  | 0.012 | 0.02 | 0.308  | -0.01 (0.04, 0.01) | 0.598 | 0.096    | 0.042 | 0.025    | 0.093    | -0.04 (0.09, 0.01)     | 0.002    | 0.168    | -0.052     | 0.021      | 0.104              | -0.05 (0.09, 0.01)     | -0.057             | 0.025  | 0.225              | -0.06 (0.11, -0.01)    |                    |                    |
| 4209_59   | THY      | CG19142 | 21  | 0.012 | 0.02 | 0.308  | -0.01 (0.04, 0.01) | 0.598 | 0.047    | 0.038 | 0.025    | 0.160    | -0.04 (0.09, 0.01)     | 0.001    | 0.301    | -0.040     | 0.024      | 0.160              | -0.04 (0.09, 0.01)     | -0.040             | 0.024  | 0.160              | -0.04 (0.09, 0.01)     |                    |                    |
| 8473_55   | BPIFA1   | CG08751 | 21  | 0.012 | 0.02 | 0.308  | -0.01 (0.01, 0.04) | 0.598 | 0.129    | 0.045 | 0.024    | 0.065    | -0.04 (0.09, 2.58e-03) | 0.004    | 0.007    | -0.008     | 0.021      | 0.702              | -0.01 (0.05, 0.03)     | 0.000              | 0.024  | 0.985              | 4.69e-04 (0.05, 0.05)  |                    |                    |
| 8236_8    | C12orf52 | CG18201 | 21  | 0.012 | 0.02 | 0.308  | -0.01 (0.01, 0.03) | 0.598 | 0.788    | 0.016 | 0.023    | 0.075    | -0.02 (0.06, 0.03)     | 0.002    | 0.158    | 0.021      | 0.023      | 0.302              | -0.02 (0.06, 0.02)     | 0.021              | 0.026  | 0.411              | 0.02 (0.03, 0.07)      |                    |                    |
| 8300_82   | PKC14    | CG12881 | 21  | 0.012 | 0.02 | 0.307  | -0.01 (0.01, 0.03) | 0.598 | 0.225    | 0.025 | 0.024    | 0.017    | -0.03 (0.08, 0.03)     | 0.001    | 0.278    | -0.046     | 0.020      | 0.020              | -0.05 (0.08, 0.01)     | -0.042             | 0.023  | 0.195              | -0.04 (0.08, 4.50e-03) |                    |                    |
| 8017_8    | SPR      | PS5270  | 21  | 0.012 | 0.02 | 0.307  | -0.01 (0.01, 0.03) | 0.598 | 0.381    | 0.035 | 0.023    | 0.129    | -0.04 (0.08, 0.01)     | 0.003    | 0.019    | 0.000      | 0.024      | 0.944              | -1.82e-04 (0.05, 0.01) | -0.017             | 0.021  | 0.433              | -0.02 (0.06, 0.03)     |                    |                    |
| 12698_166 | PRMT3    | CG06078 | 21  | 0.012 | 0.02 | 0.307  | -0.01 (0.01, 0.03) | 0.598 | 0.005    | 0.029 | 0.028    | 0.272    | -0.03 (0.08, 0.02)     | 0.003    | 0.062    | 0.004      | 0.020      | 0.834              | 4.20e-03 (0.04, 0.00)  | -0.038             | 0.027  | 0.153              | -0.04 (0.09, 0.01)     |                    |                    |
| 19224_5   | EP1AY    | CG12162 | 21  | 0.012 | 0.02 | 0.307  | -0.01 (0.01, 0.03) | 0.599 | 0.030    | 0.048 | 0.026    | 0.180    | -0.04 (0.08, 0.01)     | 0.002    | 0.146    | -0.057     | 0.021      | 0.500              | -0.01 (0.05, 0.01)     | -0.058             | 0.027  | 0.229              | -0.06 (0.11, -0.01)    |                    |                    |
| 13735_1   | RAP1GAP  | PT1736  | 21  | 0.012 | 0.02 | 0.308  | -0.01 (0.01, 0.03) | 0.599 | 0.288    | 0.030 | 0.024    | 0.209    | -0.03 (0.08, 0.02)     | 0.003    | 0.043    | 0.002      | 0.024      | 0.936              | -1.91e-03 (0.04, 0.00) | -0.009             | 0.023  | 0.709              | -0.01 (0.05, 0.04)     |                    |                    |
| 18229_30  | NCP1B    | CG12162 | 21  | 0.013 | 0.03 | 0.308  | -0.01 (0.01, 0.04) | 0.599 | 0.018    | 0.035 | 0.025    | 0.160    | -0.04 (0.08, 0.01)     | 0.002    | 0.027    | 0.014      | 0.021      | 0.500              | -0.01 (0.05, 0.03)     | -0.007             | 0.023  | 0.758              | -0.01 (0.05, 0.04)     |                    |                    |
| 11177_16  | KRT5     | P13647  | 21  | 0.013 | 0.03 | 0.308  | -0.01 (0.04, 0.01) | 0.600 | 0.005    | 0.051 | 0.028    | 0.045    | -0.05 (0.10, 0.61e-04) | 0.002    | 0.102    | -0.031     | 0.023      | 0.195              | -0.03 (0.08, 0.01)     | -0.029             | 0.023  | 0.212              | -0.03 (0.08, 0.02)     |                    |                    |
| 12260_9   | NTRC     | CG18205 | 21  | 0.012 | 0.02 | 0.309  | -0.01 (0.04, 0.01) | 0.600 | 0.237    | 0.030 | 0.025    | 0.217    | -0.03 (0.08, 0.02)     | 0.001    | 0.391    | -0.028     | 0.022      | 0.204              | -0.03 (0.07, 0.02)     | -0.035             | 0.025  | 0.254              | -0.03 (0.08, 0.01)     |                    |                    |
| 18417_3   | ASMT1    | CG18889 | 21  | 0.013 | 0.03 | 0.308  | -0.01 (0.01, 0.04) | 0.600 | 0.049    | 0.058 | 0.025    | 0.050    | -0.08 (0.10, 0.01)     | 0.004    | 0.001    | -0.006     | 0.024      | 0.768              | -0.01 (0.08, 0.04)     | 0.004              | 0.024  | 0.962              | 4.24e-03 (0.04, 0.05)  |                    |                    |
| 7925_18   | SMO2     | ANCF2E2 | 21  | 0.012 | 0.02 | 0.308  | -0.01 (0.01, 0.03) | 0.600 | 0.101    | 0.089 | 0.024    | 0.024    | -0.07 (0.12, 0.02)     | 0.005    | 1.20E-04 | -0.029     | 0.020      | 0.244              | -0.03 (0.07, 0.02)     | -0.029             | 0.024  | 0.539              | -0.03 (0.08, 0.02)     |                    |                    |
| 11378_37  | SYK      | P34305  | 21  | 0.012 | 0.02 | 0.309  | -0.01 (0.04, 0.01) | 0.600 | 0.135    | 0.035 | 0.025    | 0.155    | -0.04 (0.08, 0.01)     | 0.001    | 0.277    | -0.004     | 0.024      | 0.151              | -0.03 (0.08, 0.01)     | -0.043             | 0.028  | 0.907              | -0.04 (0.09, 0.01)     |                    |                    |
| 15343_337 | KMT1     | CG12162 | 21  | 0.012 | 0.02 | 0.309  | -0.01 (0.01, 0.03) | 0.601 | 0.006    | 0.009 | 0.027    | 0.184    | -0.04 (0.08, 0.01)     | 0.000    | 0.831    | 0.001      | 0.024      | 0.858              | 2.99e-03 (0.04, 0.00)  | 0.008              | 0.024  | 0.901              | -0.01 (0.04, 0.00)     |                    |                    |
| 13984_1   | SLK      | PC22087 | 21  | 0.013 | 0.03 | 0.309  | -0.01 (0.01, 0.04) | 0.601 | 0.015    | 0.011 | 0.025    | 0.005    | -0.07 (0.12, 0.02)     | 0.005    | 1.20E-04 | -0.017     | 0.021      | 0.425              | -0.02 (0.06, 0.02)     | -0.011             | 0.024  | 0.653              | -0.01 (0.06, 0.04)     |                    |                    |
| 1032_55   | BST2     | CG10562 | 21  | 0.012 | 0.02 | 0.309  | -0.01 (0.01, 0.03) | 0.602 | 0.002    | 0.002 | 0.025    | 0.180    | -0.04 (0.08, 0.01)     | 0.002    | 0.056    | -0.007     | 0.021      | 0.714              | -0.01 (0.05, 0.03)     | -0.005             | 0.024  | 0.714              | -0.01 (0.05, 0.04)     |                    |                    |
| 14047_78  | BONF     | PC23580 | 21  | 0.015 | 0.05 | 0.310  | -0.02 (0.04, 0.01) | 0.601 | 7.05E-06 | 0.055 | 0.029    | 0.082    | -0.05 (0.10, 2.35e-03) | 0.003    | 0.115    | -0.044     | 0.020      | 0.053              | 0.05 (0.09, 6.75e-04)  | -0.044             | 0.023  | 0.057              | -0.04 (0.09, 1.04e-03) |                    |                    |
| 12786_51  | GFPCD1   | PC19858 | 21  | 0.012 | 0.02 | 0.311  | -0.01 (0.04, 0.01) | 0.603 | 0.205    | 0.025 | 0.022    | 0.302    | -0.03 (0.07, 0.02)     | 0.001    | 0.530    | -0.044     | 0.020      | 0.208              | -0.04 (0.08, 4.88e-03) | -0.043             | 0.024  | 0.881              | -0.04 (0.09, 0.01)     |                    |                    |
| 8272_2    | HSD17B4  | PS6042  | 21  | 0.012 | 0.02 | 0.311  | -0.01 (0.01, 0.03) | 0.603 | 0.460    | 0.033 | 0.023    | 0.072    | -0.03 (0.07, 0.02)     | 0.001    | 0.617    | -0.011     | 0.020      | 0.023              | 0.017                  | -0.01 (0.05, 0.03) | -0.003 | 0.023              | 0.617                  | -0.01 (0.05, 0.03) |                    |
| 10445_20  | APOM     | PS6445  | 21  | 0.016 | 0.06 | 0.311  | -0.02 (0.05, 0.02) | 0.603 | 4.85E-11 | 0.008 | 0.032    | 0.184    | -0.01 (0.07, 0.06)     | 0.001    | 0.697    | 0.028      | 0.021      | 0.173              | -0.01 (0.07, 0.01)     | -0.038             | 0.028  | 0.166              | 0.04 (-0.02, 0.09)     |                    |                    |
| 13377_3   | CYB5B101 | CG18201 | 21  | 0.014 | 0.04 | 0.311  | -0.01 (0.01, 0.04) | 0.603 | 0.003    | 0.003 | 0.027    | 0.194    | -0.03 (0.08, 0.02)     | 0.003    | 0.036    | -0.011     | 0.024      | 0.654              | -0.01 (0.08, 0.04)     | -0.042             | 0.025  | 0.940              | -1.90e-03 (0.05, 0.05) |                    |                    |
| 14303_14  | ACAD8    | CG12162 | 21  | 0.012 | 0.02 | 0.312  | -0.01 (0.01, 0.03) | 0.603 | 0.132    | 0.012 | 0.024    | 0.184    | -0.04 (0.08, 0.01)     | 0.002    | 0.059    | 0.028      | 0.020      | 0.834              | -0.03 (0.08, 0.01)     | -0.012             | 0.024  | 0.901              | -0.01 (0.04, 0.00)     |                    |                    |
| 11352_42  | TRT      | CG18201 | 21  | 0.012 | 0.02 | 0.312  | -0.01 (0.01, 0.04) | 0.604 | 0.042    | 0.031 | 0.025    | 0.215    | -0.03 (0.08, 0.02)     | 0.003    | 0.042    | 0.003      | 0.024      | 0.699              | -0.01 (0.05, 0.03)     | -0.005             | 0.023  | 0.817              | -0.01 (0.04, 0.05)     |                    |                    |
| 16580_10  | HSP9A    | CG12162 | 21  | 0.012 | 0.02 | 0.312  | -0.01 (0.01, 0.03) | 0.604 | 0.002    | 0.002 | 0.025    | 0.184    | -0.04 (0.08, 0.01)     | 0.002    | 0.059    | 0.028      | 0.020      | 0.834              | -0.03 (0.08, 0.01)     | -0.012             | 0.024  | 0.901              |                        |                    |                    |

Table S3. Association of type 2 diabetes with deCODE plasma protein

| Gene     | Uniprot      | nsnp   | bw | bw    | se_bw | prval | CI_low | CI_high       | FOR_low | Q_val    | egger  | se_egger | prval_egger | CI_low_egger | CI_high_egger      | egger  | Interegger | prval_inter | se_inter | CI_low_inter | CI_high_inter | b_mede             | se_mede | CI_low_mede | CI_high_mede |           |                   |
|----------|--------------|--------|----|-------|-------|-------|--------|---------------|---------|----------|--------|----------|-------------|--------------|--------------------|--------|------------|-------------|----------|--------------|---------------|--------------------|---------|-------------|--------------|-----------|-------------------|
| 14947.34 | EIF3         | FR5822 | 21 | -0.11 | 0.012 | 0.350 | -0.01  | (-0.04, 0.01) | 0.838   | 0.157    | -0.037 | 0.025    | 0.147       | -0.04        | (-0.09, 0.01)      | 0.002  | 0.246      | -0.044      | 0.021    | 0.032        | -0.04         | (-0.09, -3.82e-02) | -0.052  | 0.028       | 0.072        | -0.05     | (-0.11, 4.25e-03) |
| 4444.4   | PRPF         | Q27275 | 21 | -0.11 | 0.012 | 0.350 | -0.01  | (-0.04, 0.01) | 0.838   | 0.157    | -0.037 | 0.025    | 0.147       | -0.04        | (-0.09, 0.01)      | 0.002  | 0.246      | -0.044      | 0.021    | 0.032        | -0.04         | (-0.09, -3.82e-02) | -0.052  | 0.028       | 0.072        | -0.05     | (-0.11, 4.25e-03) |
| 17152.10 | KRMA5        | P43632 | 21 | 0.11  | 0.012 | 0.350 | 0.01   | (0.01, 0.03)  | 0.638   | 0.174    | -0.053 | 0.024    | 0.182       | -0.05        | (-0.10, 0.01)      | 0.004  | 0.002      | -0.009      | 0.020    | 0.654        | 0.01          | (0.05, 0.03)       | -0.018  | 0.023       | 0.448        | -0.02     | (0.06, 0.03)      |
| 18826.7  | PRMD3        | P25788 | 21 | 0.11  | 0.012 | 0.350 | 0.01   | (0.01, 0.03)  | 0.638   | 0.174    | -0.053 | 0.024    | 0.182       | -0.05        | (-0.10, 0.01)      | 0.004  | 0.002      | -0.009      | 0.020    | 0.654        | 0.01          | (0.05, 0.03)       | -0.018  | 0.023       | 0.448        | -0.02     | (0.06, 0.03)      |
| 14107.1  | MTRFS        | P14114 | 21 | 0.11  | 0.012 | 0.350 | 0.01   | (0.01, 0.03)  | 0.638   | 0.174    | -0.053 | 0.024    | 0.182       | -0.05        | (-0.10, 0.01)      | 0.004  | 0.002      | -0.009      | 0.020    | 0.654        | 0.01          | (0.05, 0.03)       | -0.018  | 0.023       | 0.448        | -0.02     | (0.06, 0.03)      |
| 17222.57 | REEG         | Q68458 | 21 | 0.12  | 0.013 | 0.351 | 0.01   | (0.01, 0.04)  | 0.839   | 0.046    | -0.053 | 0.025    | 0.083       | -0.05        | (-0.10, -4.46e-02) | 0.004  | 0.003      | 0.005       | 0.020    | 0.800        | 0.01          | (0.03, 0.04)       | 0.000   | 0.023       | 0.987        | -3.73e-04 | (0.05, 0.04)      |
| 16919.35 | GB           | Q15403 | 21 | 0.11  | 0.012 | 0.351 | 0.01   | (0.01, 0.03)  | 0.839   | 0.046    | -0.053 | 0.025    | 0.083       | -0.05        | (-0.10, 0.02)      | 0.004  | 0.003      | 0.005       | 0.020    | 0.800        | 0.01          | (0.03, 0.04)       | 0.000   | 0.023       | 0.987        | -3.73e-04 | (0.05, 0.04)      |
| 30554.34 | IL4R         | Z42434 | 21 | 0.11  | 0.011 | 0.351 | 0.01   | (0.01, 0.03)  | 0.839   | 0.119    | -0.044 | 0.024    | 0.083       | -3.55e-03    | (0.05, 0.04)       | 0.001  | 0.493      | 0.008       | 0.024    | 0.730        | 0.01          | (0.05, 0.04)       | 0.004   | 0.023       | 0.848        | 4.48e-03  | (0.04, 0.05)      |
| 14163.5  | H2AF7        | PC0755 | 21 | 0.12  | 0.012 | 0.351 | 0.01   | (0.01, 0.03)  | 0.839   | 0.321    | -0.044 | 0.023    | 0.059       | -0.04        | (-0.09, -1.35e-03) | 0.003  | 0.007      | -0.020      | 0.020    | 0.121        | 0.02          | (-0.02, 0.02)      | -0.017  | 0.024       | 0.495        | -0.02     | (0.06, 0.03)      |
| 1884.8   | SSTA         | Q43792 | 21 | 0.11  | 0.012 | 0.351 | 0.01   | (0.01, 0.03)  | 0.839   | 0.046    | -0.053 | 0.025    | 0.083       | -0.05        | (-0.10, 0.01)      | 0.004  | 0.003      | 0.005       | 0.020    | 0.800        | 0.01          | (0.03, 0.04)       | 0.000   | 0.023       | 0.987        | -3.73e-04 | (0.05, 0.04)      |
| 12001.7  | TPI1         | Q07157 | 21 | 0.11  | 0.012 | 0.351 | 0.01   | (0.01, 0.03)  | 0.839   | 0.429    | -0.074 | 0.023    | 0.052       | -0.07        | (-0.12, 0.03)      | 0.004  | 0.003      | -0.034      | 0.021    | 0.105        | 0.03          | (-0.02, 0.01)      | -0.035  | 0.026       | 0.173        | -0.04     | (0.09, 0.02)      |
| 17854.33 | NAAT10       | PI1227 | 21 | 0.11  | 0.012 | 0.352 | 0.01   | (0.01, 0.03)  | 0.839   | 0.065    | -0.045 | 0.025    | 0.078       | -0.05        | (-0.10, 0.01)      | 0.004  | 0.003      | -0.009      | 0.020    | 0.725        | 0.01          | (0.05, 0.03)       | -0.042  | 0.025       | 0.998        | -0.04     | (0.09, 0.01)      |
| 1666.24  | MFAP1        | Q15811 | 21 | 0.11  | 0.012 | 0.352 | 0.01   | (0.01, 0.03)  | 0.839   | 0.046    | -0.053 | 0.025    | 0.083       | -0.05        | (-0.10, 0.01)      | 0.004  | 0.003      | 0.005       | 0.020    | 0.800        | 0.01          | (0.03, 0.04)       | 0.000   | 0.023       | 0.987        | -3.73e-04 | (0.05, 0.04)      |
| 8589.13  | CDCP1        | Q895V8 | 21 | 0.12  | 0.013 | 0.352 | 0.01   | (0.01, 0.04)  | 0.839   | 0.067    | -0.035 | 0.026    | 0.178       | -0.03        | (-0.08, 0.02)      | 0.003  | 0.005      | -0.009      | 0.024    | 0.705        | 0.01          | (0.06, 0.04)       | -0.009  | 0.024       | 0.727        | -0.01     | (0.04, 0.04)      |
| 14893.3  | SEC13        | P55739 | 21 | 0.11  | 0.012 | 0.352 | 0.01   | (0.01, 0.03)  | 0.839   | 0.046    | -0.053 | 0.025    | 0.083       | -0.05        | (-0.10, 0.02)      | 0.004  | 0.003      | 0.005       | 0.020    | 0.800        | 0.01          | (0.03, 0.04)       | 0.000   | 0.023       | 0.987        | -3.73e-04 | (0.05, 0.04)      |
| 19869.17 | KATZ         | Q62830 | 21 | 0.11  | 0.012 | 0.352 | 0.01   | (0.01, 0.03)  | 0.839   | 0.095    | -0.055 | 0.025    | 0.083       | -0.01        | (0.04, 0.05)       | 0.004  | 0.003      | 0.005       | 0.020    | 0.800        | 0.01          | (0.03, 0.04)       | 0.000   | 0.023       | 0.987        | -3.73e-04 | (0.05, 0.04)      |
| 9002.90  | GAD45/GORTA8 | Q15811 | 21 | 0.11  | 0.012 | 0.352 | 0.01   | (0.01, 0.03)  | 0.839   | 0.145    | -0.055 | 0.024    | 0.023       | -0.05        | (-0.10, -0.01)     | 0.004  | 0.002      | -0.023      | 0.020    | 0.237        | 0.02          | (-0.02, 0.02)      | -0.016  | 0.023       | 0.481        | -0.02     | (0.06, 0.04)      |
| 10847.1  | SUCF1B       | Q20283 | 21 | 0.11  | 0.013 | 0.353 | 0.01   | (0.01, 0.04)  | 0.839   | 0.031    | -0.046 | 0.025    | 0.083       | -0.01        | (-0.10, 0.03)      | 0.004  | 0.006      | -0.011      | 0.022    | 0.634        | 0.01          | (0.05, 0.03)       | -0.012  | 0.023       | 0.987        | -3.73e-04 | (0.05, 0.04)      |
| 15417.3  | SRPNB5       | P9852  | 21 | -0.12 | 0.013 | 0.353 | -0.01  | (-0.04, 0.01) | 0.839   | 0.002    | -0.047 | 0.027    | 0.081       | -0.05        | (-0.10, 0.01)      | 0.002  | 0.139      | -0.047      | 0.022    | 0.032        | 0.05          | (-0.09, -4.02e-03) | -0.035  | 0.024       | 0.143        | -0.03     | (0.08, 0.01)      |
| 19025.21 | ADH14        | Q8R84  | 21 | 0.11  | 0.012 | 0.353 | 0.01   | (0.01, 0.03)  | 0.839   | 0.839    | 0.027  | 0.023    | 0.918       | 2.41e-03     | (0.04, 0.05)       | 0.001  | 0.877      | 0.006       | 0.023    | 0.734        | 0.01          | (0.04, 0.05)       | -0.011  | 0.023       | 0.620        | 0.01      | (0.04, 0.03)      |
| 14149.9  | IL30         | Q82970 | 21 | 0.11  | 0.012 | 0.353 | 0.01   | (0.01, 0.03)  | 0.840   | 0.049    | -0.049 | 0.024    | 0.116       | -0.04        | (-0.09, 0.01)      | 0.004  | 0.007      | -0.010      | 0.020    | 0.460        | 0.02          | (0.06, 0.02)       | -0.020  | 0.023       | 0.375        | -0.02     | (0.07, 0.01)      |
| 13711.10 | CLTC         | Q00610 | 21 | 0.11  | 0.012 | 0.354 | 0.01   | (0.01, 0.03)  | 0.840   | 0.560    | -0.043 | 0.023    | 0.086       | -0.04        | (-0.09, 0.01)      | 0.003  | 0.008      | -0.010      | 0.020    | 0.619        | 0.01          | (0.05, 0.03)       | -0.020  | 0.023       | 0.384        | -0.02     | (0.06, 0.02)      |
| 10418.36 | STK12        | Q89892 | 21 | 0.11  | 0.012 | 0.355 | 0.01   | (0.01, 0.03)  | 0.840   | 0.068    | -0.049 | 0.024    | 0.116       | -0.04        | (-0.09, 0.01)      | 0.004  | 0.020      | -0.017      | 0.020    | 0.460        | 0.02          | (0.06, 0.02)       | -0.020  | 0.023       | 0.375        | -0.02     | (0.07, 0.01)      |
| 18385.4  | PSM10        | U75832 | 21 | -0.12 | 0.013 | 0.354 | -0.01  | (-0.04, 0.01) | 0.840   | 0.100    | -0.060 | 0.028    | 0.022       | -0.06        | (-0.11, -0.01)     | 0.003  | 0.034      | -0.037      | 0.022    | 0.904        | 0.04          | (0.08, 0.01)       | -0.028  | 0.024       | 0.282        | -0.03     | (0.07, 0.02)      |
| 19154.41 | SRPNB2       | Q17093 | 21 | -0.13 | 0.014 | 0.354 | -0.01  | (-0.04, 0.01) | 0.840   | 0.003    | -0.060 | 0.027    | 0.029       | -0.08        | (-0.11, -0.01)     | 0.003  | 0.046      | -0.052      | 0.023    | 0.022        | 0.05          | (-0.10, -0.01)     | -0.048  | 0.024       | 0.046        | -0.05     | (0.09, -1.05e-03) |
| 1452.17  | LCK          | P62932 | 21 | 0.11  | 0.012 | 0.354 | 0.01   | (0.01, 0.03)  | 0.840   | 0.226    | -0.030 | 0.024    | 0.205       | -0.03        | (-0.08, 0.02)      | 0.003  | 0.047      | 0.006       | 0.020    | 0.754        | 0.01          | (0.03, 0.04)       | -0.003  | 0.022       | 0.998        | -2.79e-03 | (0.05, 0.04)      |
| 4148.49  | PAPPA        | Q13219 | 21 | -0.08 | 0.017 | 0.354 | -0.02  | (-0.05, 0.02) | 0.840   | 6.85E-14 | 0.016  | 0.034    | 0.841       | 0.02         | (0.05, 0.01)       | -0.002 | 0.281      | -0.022      | 0.025    | 0.931        | 0.02          | (0.07, 0.03)       | -0.000  | 0.027       | 0.993        | 2.77e-04  | (0.07, 0.03)      |
| 8256.22  | USX1         | Q82827 | 21 | 0.11  | 0.012 | 0.354 | 0.01   | (0.01, 0.04)  | 0.840   | 2.93E-04 | -0.055 | 0.028    | 0.048       | -0.06        | (-0.11, -1.32e-02) | 0.004  | 0.004      | -0.007      | 0.020    | 0.749        | 0.01          | (0.05, 0.03)       | -0.030  | 0.027       | 0.273        | -0.03     | (0.08, 0.02)      |
| 105.10   | CKX17        | Q15811 | 21 | 0.11  | 0.012 | 0.354 | 0.01   | (0.01, 0.04)  | 0.840   | 0.047    | -0.059 | 0.025    | 0.083       | -0.05        | (-0.10, 0.01)      | 0.004  | 0.001      | -0.020      | 0.020    | 0.634        | 0.01          | (0.05, 0.03)       | -0.018  | 0.022       | 0.375        | -0.02     | (0.07, 0.01)      |
| 4712.28  | APCD         | P05900 | 21 | 0.13  | 0.014 | 0.354 | 0.01   | (0.01, 0.04)  | 0.841   | 1.75E-04 | -0.055 | 0.027    | 0.048       | -0.05        | (-0.11, -8.95e-03) | 0.004  | 0.005      | -0.004      | 0.022    | 0.846        | 0.01          | (0.05, 0.01)       | -0.003  | 0.024       | 0.907        | -2.78e-03 | (0.05, 0.04)      |
| 9207.15  | CDK2         | Q72701 | 21 | 0.11  | 0.012 | 0.355 | 0.01   | (0.01, 0.03)  | 0.840   | 0.046    | -0.053 | 0.025    | 0.083       | -0.05        | (-0.10, 0.01)      | 0.004  | 0.003      | 0.005       | 0.020    | 0.800        | 0.01          | (0.03, 0.04)       | 0.000   | 0.023       | 0.987        | -3.73e-04 | (0.05, 0.04)      |
| 8601.187 | LRP1         | Q07854 | 21 | 0.11  | 0.012 | 0.355 | 0.01   | (0.01, 0.03)  | 0.841   | 0.572    | -0.016 | 0.023    | 0.481       | -0.02        | (-0.06, 0.03)      | 0.002  | 0.176      | -0.028      | 0.022    | 0.234        | 0.03          | (-0.02, 0.02)      | -0.018  | 0.023       | 0.434        | -0.02     | (0.06, 0.03)      |
| 13133.73 | TBP4         | Q82827 | 21 | -0.14 | 0.015 | 0.356 | -0.01  | (-0.04, 0.02) | 0.842   | 9.20E-08 | 0.028  | 0.030    | 0.346       | 0.03         | (0.03, 0.03)       | 0.003  | 0.194      | -0.014      | 0.027    | 0.610        | 0.01          | (0.07, 0.04)       | -0.021  | 0.028       | 0.708        | -0.01     | (0.07, 0.04)      |
| 14111.10 | UREC4        | Q15811 | 21 | 0.11  | 0.012 | 0.356 | 0.01   | (0.01, 0.04)  | 0.842   | 0.046    | -0.053 | 0.025    | 0.083       | -0.05        | (-0.10, 0.05)      | 0.004  | 0.005      | 0.006       | 0.020    | 0.800        | 0.01          | (0.03, 0.04)       | 0.000   | 0.023       | 0.987        | -3.73e-04 | (0.05, 0.04)      |
| 3471.49  | STK16        | Q75166 | 21 | 0.12  | 0.013 | 0.356 | 0.01   | (0.01, 0.04)  | 0.842   | 0.009    | -0.024 | 0.026    | 0.017       | -0.06        | (-0.11, -0.01)     | 0.005  | 0.001      | -0.007      | 0.022    | 0.741        | 0.01          | (0.04, 0.05)       | -0.006  | 0.023       | 0.806        | -0.01     | (0.05, 0.04)      |
| 5441.38  | TNKS1        | P19429 | 21 | 0.11  | 0.012 | 0.356 | 0.01   | (0.01, 0.03)  | 0.842   | 0.118    | -0.022 | 0.024    | 0.317       | -0.02        | (-0.07, 0.02)      | 0.002  | 0.099      | -0.019      | 0.021    | 0.379        | 0.02          | (-0.02, 0.02)      | -0.029  | 0.024       | 0.234        | -0.03     | (0.08, 0.02)      |
| 900.59   | CCL1         | Q02812 | 21 | 0.11  | 0.012 | 0.356 | 0.01   | (0.01, 0.03)  | 0.842   | 7.80E-04 | -0.029 | 0.025    | 0.093       | -0.05        | (-0.10, 0.01)      | 0.004  | 0.009      | -0.019      | 0.020    | 0.634        | 0.01          | (0.05, 0.03)       | -0.018  | 0.022       | 0.375        | -0.02     | (0.07, 0.01)      |
| 9532.5   | WBP1L        | Q82827 | 21 | 0.11  | 0.012 | 0.357 | 0.01   | (0.01, 0.03)  | 0.842   | 0.280    | -0.021 | 0.024    | 0.385       | -0.02        | (-0.07, 0.02)      | 0.002  | 0.116      | -0.015      | 0.020    | 0.441        | 0.02          | (-0.02, 0.02)      | -0.040  | 0.027       | 0.143        | -0.04     | (0.09, 0.01)      |
| 4297.62  | SPON1        | Q82827 | 21 | 0.11  | 0.012 | 0.357 | 0.01   | (0.01, 0.03)  | 0.842   | 0.046    | -0.053 | 0.025    | 0.083       | -0.05        | (-0.10, 0.01)      | 0.004  | 0.003      | 0.005       | 0.020    | 0.800        | 0.01          | (0.03, 0.04)       | 0.000   | 0.023       | 0.987        | -3.73e-04 | (0.05, 0.04)      |
| 13605.16 | ANK10        | Q82827 | 21 | 0.12  | 0.013 | 0.357 | 0.01   | (0.01, 0.04)  | 0.842   | 0.046    | -0.051 | 0.025    | 0.042       | -0.05        | (-0.10, -1.26e-02) | 0.004  | 0.004      | -0.016      | 0.020    | 0.438        | 0.02          | (0.06, 0.02)       | -0.013  | 0.023       | 0.583        | -0.0      |                   |

Table S3. Association of type 2 diabetes with deCODE plasma protein

| Gene     | Chr      | Uniprot | nsnp | Inverse variance weighted |        |         |                    | MR Egger |          |        |          | Weighted median     |                          |        |            | Weighted mode |           |                    |                        |        |         |                    |                         |
|----------|----------|---------|------|---------------------------|--------|---------|--------------------|----------|----------|--------|----------|---------------------|--------------------------|--------|------------|---------------|-----------|--------------------|------------------------|--------|---------|--------------------|-------------------------|
|          |          |         |      | b/w                       | se_b/w | pval/iv | CI_low             | FDR_IV   | Q_val    | begger | se_egger | pval/egger          | CI_egger                 | egger  | Interegger | pval/median   | se_median | pval/median        | CI_median              | b_mode | se_mode | pval_mode          | CI_mode                 |
| 1607.56  | PKLR     | P30613  | 21   | 0.010                     | 0.022  | 0.399   | -0.01 (0.01, 0.03) | 0.679    | 0.436    | 0.008  | 0.242    | 0.793               | 0.01 (0.04, 0.05)        | 0.002  | 0.853      | -0.008        | 0.223     | 0.722              | -0.01 (0.05, 0.04)     | 0.001  | 0.227   | 0.955              | -1.49e-03 (0.05, 0.05)  |
| 1811.29  | GATB1    | P27274  | 21   | 0.010                     | 0.013  | 0.249   | 0.01 (0.01, 0.03)  | 0.719    | 0.012    | 0.022  | 0.038    | -0.05 (0.10, 0.354) | 0.003                    | 0.128  | 0.022      | 0.220         | 0.169     | -0.02 (0.08, 0.03) | 0.002                  | 0.288  | 0.021   | 0.042              | 0.04 (0.02, 0.01)       |
| 3299.29  | TNNT3    | O84779  | 21   | 0.010                     | 0.012  | 0.400   | -0.01 (0.03, 0.01) | 0.681    | 0.482    | 0.033  | 0.023    | 0.157               | -0.03 (0.08, 0.01)       | 0.001  | 0.251      | -0.047        | 0.019     | 0.016              | -0.05 (0.09, 0.01)     | -0.047 | 0.024   | 0.054              | -0.05 (0.10, 0.47e-04)  |
| 7817.16  | TNEM3    | Q24249  | 21   | -0.012                    | 0.015  | 0.400   | -0.01 (0.04, 0.02) | 0.681    | 7.84E-07 | 0.014  | 0.029    | 0.621               | 0.01 (0.04, 0.07)        | -0.002 | 0.287      | -0.020        | 0.026     | 0.438              | -0.02 (0.07, 0.03)     | -0.005 | 0.025   | 0.858              | -4.56e-03 (0.05, 0.02)  |
| 12786.44 | NUGT3    | P18989  | 21   | 0.010                     | 0.013  | 0.249   | 0.01 (0.01, 0.03)  | 0.719    | 0.012    | 0.022  | 0.038    | -0.05 (0.10, 0.354) | 0.003                    | 0.128  | 0.022      | 0.220         | 0.169     | -0.02 (0.08, 0.03) | 0.002                  | 0.288  | 0.021   | 0.042              | 0.04 (0.02, 0.01)       |
| 7878.2   | SEC6B1   | P60488  | 21   | 0.010                     | 0.012  | 0.401   | -0.01 (0.03, 0.01) | 0.682    | 0.533    | 0.039  | 0.023    | 0.093               | -0.04 (0.08, 0.01)       | 0.003  | 0.016      | -0.011        | 0.023     | 0.633              | -0.01 (0.06, 0.03)     | -0.007 | 0.022   | 0.747              | -0.01 (0.05, 0.04)      |
| 10114.2  | CD1A     | O43768  | 21   | 0.010                     | 0.012  | 0.401   | -0.01 (0.03, 0.01) | 0.682    | 0.533    | 0.039  | 0.023    | 0.093               | -0.04 (0.08, 0.01)       | 0.003  | 0.016      | -0.011        | 0.023     | 0.633              | -0.01 (0.06, 0.03)     | -0.007 | 0.022   | 0.747              | -0.01 (0.05, 0.04)      |
| 14599.16 | SEMAC6   | OH9372  | 21   | 0.010                     | 0.012  | 0.402   | -0.01 (0.03, 0.01) | 0.683    | 0.104    | -0.039 | 0.024    | 0.105               | -0.04 (0.09, 0.01)       | 0.003  | 0.019      | -0.022        | 0.023     | 0.933              | -0.03 (0.07, 0.01)     | -0.022 | 0.024   | 0.348              | -0.02 (0.07, 0.02)      |
| 16999.16 | PTPIA2   | Q12974  | 21   | 0.010                     | 0.012  | 0.403   | -0.01 (0.03, 0.01) | 0.684    | 0.177    | -0.043 | 0.025    | 0.085               | -0.04 (0.09, 0.01)       | 0.002  | 0.126      | -0.046        | 0.023     | 0.407              | -0.05 (0.09, 0.04)     | -0.047 | 0.025   | 0.601              | -0.05 (0.10, 1.88e-03)  |
| 14299.2  | NFATC1   | Q86944  | 21   | 0.010                     | 0.012  | 0.403   | -0.01 (0.03, 0.01) | 0.684    | 0.177    | -0.043 | 0.025    | 0.085               | -0.04 (0.09, 0.01)       | 0.002  | 0.126      | -0.046        | 0.023     | 0.407              | -0.05 (0.09, 0.04)     | -0.047 | 0.025   | 0.601              | -0.05 (0.10, 1.88e-03)  |
| 7786.48  | CLEC2B   | Q82478  | 21   | 0.010                     | 0.012  | 0.403   | -0.01 (0.03, 0.01) | 0.684    | 0.060    | -0.051 | 0.024    | 0.037               | -0.05 (0.10, -0.347e-02) | 0.004  | 0.004      | -0.027        | 0.023     | 0.217              | -0.03 (0.08, 0.02)     | -0.009 | 0.025   | 0.713              | -0.01 (0.06, 0.04)      |
| 10445.50 | ANKRD27  | Q8R9W4  | 21   | 0.010                     | 0.012  | 0.403   | -0.01 (0.03, 0.01) | 0.684    | 1.139    | -0.027 | 0.024    | 0.271               | -0.03 (0.07, 0.02)       | 0.002  | 0.083      | -0.011        | 0.022     | 0.627              | -0.01 (0.05, 0.03)     | -0.009 | 0.023   | 0.705              | -0.01 (0.05, 0.04)      |
| 13062.4  | EMG3     | P27274  | 21   | 0.010                     | 0.013  | 0.249   | 0.01 (0.01, 0.03)  | 0.719    | 0.012    | 0.022  | 0.038    | -0.05 (0.10, 0.354) | 0.003                    | 0.128  | 0.022      | 0.220         | 0.169     | -0.02 (0.08, 0.03) | 0.002                  | 0.288  | 0.021   | 0.042              | 0.04 (0.02, 0.01)       |
| 12616.60 | PDXL2    | Q8N253  | 21   | 0.010                     | 0.012  | 0.404   | -0.01 (0.03, 0.01) | 0.685    | 0.034    | -0.008 | 0.025    | 0.173               | -0.01 (0.04, 0.06)       | 0.000  | 0.904      | -0.017        | 0.020     | 0.388              | -0.02 (0.06, 0.02)     | -0.022 | 0.028   | 0.418              | -0.02 (0.06, 0.03)      |
| 17734.13 | EN3A     | Q43768  | 21   | 0.010                     | 0.012  | 0.401   | -0.01 (0.03, 0.01) | 0.682    | 0.091    | -0.025 | 0.025    | 0.105               | -0.03 (0.07, 0.02)       | 0.001  | 0.099      | -0.019        | 0.025     | 0.645              | -0.02 (0.07, 0.03)     | -0.006 | 0.028   | 0.604              | -0.01 (0.06, 0.04)      |
| 5018.88  | PRDX6    | P30041  | 21   | -0.011                    | 0.013  | 0.405   | -0.01 (0.04, 0.01) | 0.685    | 0.045    | -0.039 | 0.028    | 0.130               | -0.04 (0.09, 0.01)       | 0.002  | 0.205      | -0.053        | 0.023     | 0.203              | -0.05 (0.10, 0.01)     | -0.054 | 0.026   | 0.037              | -0.05 (0.10, -3.88e-03) |
| 5912.87  | AK1      | O05688  | 21   | -0.011                    | 0.014  | 0.404   | -0.01 (0.04, 0.02) | 0.685    | 0.003    | -0.040 | 0.027    | 0.139               | -0.04 (0.09, 0.01)       | 0.002  | 0.220      | -0.034        | 0.023     | 0.130              | -0.03 (0.08, 0.01)     | -0.037 | 0.025   | 0.137              | -0.04 (0.09, 0.01)      |
| 11242.33 | TM61     | P18989  | 21   | 0.010                     | 0.013  | 0.249   | 0.01 (0.01, 0.03)  | 0.719    | 0.012    | 0.022  | 0.038    | -0.05 (0.10, 0.354) | 0.003                    | 0.128  | 0.022      | 0.220         | 0.169     | -0.02 (0.08, 0.03) | -0.013                 | 0.023  | 0.104   | -0.04 (0.09, 0.01) |                         |
| 17799.9  | PGLS     | O05336  | 21   | 0.010                     | 0.012  | 0.405   | -0.01 (0.04, 0.01) | 0.685    | 0.106    | -0.037 | 0.025    | 0.144               | -0.04 (0.09, 0.01)       | 0.002  | 0.217      | -0.037        | 0.023     | 0.125              | -0.03 (0.08, 0.01)     | -0.035 | 0.024   | 0.142              | -0.03 (0.08, 0.01)      |
| 8362.17  | MANBA    | O04622  | 21   | -0.034                    | 0.041  | 0.405   | -0.03 (0.11, 0.05) | 0.685    | 0.00E+00 | 0.029  | 0.028    | 0.222               | -0.06 (0.13, 0.13)       | 0.004  | 0.386      | -0.027        | 0.022     | 0.220              | -0.03 (0.08, 0.01)     | -0.018 | 0.026   | 0.485              | -0.02 (0.07, 0.03)      |
| 8364.7   | TRFPLR   | Q8R9S9  | 21   | 0.007                     | 0.009  | 0.405   | -0.01 (0.04, 0.02) | 0.686    | 0.017    | 0.004  | 0.019    | 0.041               | -0.04 (0.09, 0.01)       | 0.001  | 0.452      | -0.004        | 0.015     | 0.787              | -0.03 (0.08, 0.03)     | -0.002 | 0.019   | 0.804              | -0.03 (0.08, 0.03)      |
| 5021.13  | PPA1     | O15181  | 21   | 0.010                     | 0.012  | 0.406   | -0.01 (0.03, 0.01) | 0.686    | 0.104    | -0.031 | 0.025    | 0.217               | -0.03 (0.08, 0.02)       | 0.003  | 0.059      | -0.009        | 0.021     | 0.663              | -0.01 (0.05, 0.03)     | -0.018 | 0.024   | 0.502              | -0.02 (0.06, 0.03)      |
| 5332.53  | FOF1B    | P17682  | 21   | -0.012                    | 0.014  | 0.406   | -0.01 (0.04, 0.02) | 0.686    | 1.29E-04 | 0.037  | 0.038    | 0.194               | -0.04 (0.09, 0.01)       | -0.003 | 0.047      | -0.006        | 0.021     | 0.777              | -0.01 (0.05, 0.03)     | -0.013 | 0.026   | 0.814              | -0.01 (0.06, 0.04)      |
| 5687.5   | PKRCS3   | P14314  | 21   | 0.010                     | 0.012  | 0.406   | -0.01 (0.03, 0.01) | 0.686    | 0.074    | -0.046 | 0.025    | 0.084               | -0.05 (0.09, 0.24e-03)   | 0.002  | 0.091      | -0.042        | 0.023     | 0.093              | -0.03 (0.08, 0.14e-04) | -0.038 | 0.025   | 0.130              | -0.04 (0.09, 0.01)      |
| 9049.2   | SIL16A1  | Q15427  | 21   | 0.010                     | 0.012  | 0.406   | -0.01 (0.03, 0.01) | 0.686    | 0.292    | -0.032 | 0.023    | 0.169               | -0.03 (0.08, 0.01)       | 0.003  | 0.039      | -0.009        | 0.024     | 0.716              | -0.01 (0.04, 0.04)     | -0.010 | 0.025   | 0.683              | -0.01 (0.06, 0.04)      |
| 14034.29 | HR23F    | Q90475  | 21   | 0.010                     | 0.012  | 0.406   | -0.01 (0.03, 0.01) | 0.686    | 1.19E-12 | 0.035  | 0.033    | 0.298               | -0.01 (0.04, 0.10)       | 0.001  | 0.469      | -0.035        | 0.025     | 0.156              | -0.04 (0.08, 0.01)     | -0.038 | 0.024   | 0.104              | -0.04 (0.09, 0.01)      |
| 5007.17  | MAPK14   | O15639  | 21   | 0.010                     | 0.012  | 0.407   | -0.01 (0.03, 0.01) | 0.686    | 0.320    | -0.028 | 0.024    | 0.248               | -0.03 (0.08, 0.02)       | 0.001  | 0.387      | -0.038        | 0.023     | 0.177              | -0.04 (0.08, 0.01)     | -0.043 | 0.025   | 0.088              | -0.04 (0.09, 0.01)      |
| 10589.29 | MFSD1    | P55001  | 21   | 0.011                     | 0.013  | 0.407   | -0.01 (0.03, 0.01) | 0.686    | 0.018    | -0.038 | 0.028    | 0.174               | -0.04 (0.09, 0.02)       | 0.003  | 0.040      | -0.005        | 0.023     | 0.841              | -0.02 (0.06, 0.04)     | 0.001  | 0.025   | 0.960              | -1.26e-03 (0.05, 0.05)  |
| 12415.12 | CEP350   | P18989  | 21   | 0.011                     | 0.013  | 0.407   | -0.01 (0.03, 0.01) | 0.686    | 0.013    | 0.060  | 0.026    | 0.125               | -0.01 (0.11, 0.01)       | 0.004  | 0.001      | -0.021        | 0.022     | 0.417              | -0.02 (0.06, 0.02)     | -0.014 | 0.022   | 0.901              | -0.02 (0.06, 0.02)      |
| 4840.73  | CSF3     | P09919  | 21   | 0.011                     | 0.013  | 0.407   | -0.01 (0.03, 0.01) | 0.686    | 0.004    | -0.012 | 0.027    | 0.646               | -0.01 (0.06, 0.04)       | 0.001  | 0.314      | -0.017        | 0.025     | 0.497              | -0.02 (0.06, 0.04)     | 0.009  | 0.024   | 0.701              | -0.01 (0.04, 0.06)      |
| 12014.19 | FOF1B    | P17682  | 21   | 0.010                     | 0.012  | 0.406   | -0.01 (0.04, 0.02) | 0.686    | 0.017    | 0.003  | 0.017    | 0.041               | -0.04 (0.09, 0.01)       | 0.001  | 0.452      | -0.004        | 0.015     | 0.787              | -0.03 (0.08, 0.03)     | -0.002 | 0.019   | 0.804              | -0.03 (0.08, 0.03)      |
| 7926.13  | SPN13    | Q20443  | 21   | 0.010                     | 0.012  | 0.408   | -0.01 (0.03, 0.01) | 0.687    | 0.188    | -0.029 | 0.024    | 0.221               | -0.03 (0.08, 0.02)       | 0.002  | 0.061      | -0.019        | 0.024     | 0.414              | -0.02 (0.07, 0.03)     | -0.020 | 0.025   | 0.435              | -0.02 (0.07, 0.03)      |
| 14028.22 | PKCZCA   | Q09243  | 21   | 0.011                     | 0.013  | 0.408   | -0.01 (0.03, 0.01) | 0.688    | 0.029    | -0.058 | 0.025    | 0.279               | -0.03 (0.11, 0.01)       | 0.004  | 0.002      | -0.022        | 0.023     | 0.342              | -0.02 (0.07, 0.02)     | -0.016 | 0.023   | 0.472              | -0.02 (0.06, 0.03)      |
| 19612.3  | CSN1     | Q86933  | 21   | 0.010                     | 0.012  | 0.404   | -0.01 (0.03, 0.01) | 0.688    | 0.054    | -0.011 | 0.024    | 0.159               | -0.03 (0.08, 0.01)       | 0.003  | 0.017      | -0.005        | 0.023     | 0.462              | -0.02 (0.06, 0.03)     | -0.017 | 0.023   | 0.601              | -0.01 (0.06, 0.04)      |
| 5679.54  | CSX2     | P42127  | 21   | 0.015                     | 0.018  | 0.409   | -0.01 (0.02, 0.05) | 0.689    | 2.11E+25 | 0.010  | 0.036    | 0.784               | -0.01 (0.08, 0.06)       | 0.002  | 0.426      | -0.015        | 0.021     | 0.496              | -0.01 (0.05, 0.03)     | -0.016 | 0.023   | 0.484              | -0.02 (0.06, 0.03)      |
| 7801.1   | COM42    | Q8R9C9  | 21   | 0.011                     | 0.014  | 0.409   | -0.01 (0.03, 0.01) | 0.689    | 0.003    | -0.061 | 0.026    | 0.222               | -0.06 (0.11, -0.11)      | 0.004  | 0.002      | -0.004        | 0.022     | 0.698              | -0.03 (0.08, 0.03)     | -0.013 | 0.024   | 0.892              | -3.26e-03 (0.04, 0.05)  |
| 8653.33  | LYN      | P07843  | 21   | 0.010                     | 0.013  | 0.409   | -0.01 (0.03, 0.01) | 0.689    | 0.004    | -0.024 | 0.026    | 0.222               | -0.06 (0.11, -0.11)      | 0.004  | 0.002      | -0.004        | 0.022     | 0.698              | -0.03 (0.08, 0.03)     | -0.013 | 0.024   | 0.892              | -3.26e-03 (0.04, 0.05)  |
| 7207.4   | AK1      | O15181  | 21   | 0.010                     | 0.012  | 0.410   | -0.01 (0.03, 0.01) | 0.689    | 0.374    | -0.043 | 0.023    | 0.084               | -0.04 (0.09, 0.224e-03)  | 0.003  | 0.009      | -0.021        | 0.021     | 0.634              | -0.02 (0.06, 0.02)     | -0.018 | 0.023   | 0.427              | -0.02 (0.06, 0.03)      |
| 7232.7   | ESF3K    | Q00434  | 21   | 0.010                     | 0.012  | 0.410   | -0.01 (0.03, 0.01) | 0.689    | 7.50E-03 | 0.023  | 0.023    | 0.265               | -0.02 (0.07, 0.02)       | 0.003  | 0.009      | -0.021        | 0.021     | 0.634              | -0.02 (0.06, 0.02)     | -0.018 | 0.023   | 0.427              | -0.02 (0.06, 0.03)      |
| 4420.7   | RAM1     | Q43184  | 21   | 0.010                     | 0.012  | 0.410   | -0.01 (0.03, 0.01) | 0.689    | 0.408    | -0.028 | 0.023    | 0.225               | -0.03 (0.08, 0.02)       | 0.002  | 0.060      | -0.011        | 0.022     | 0.919              | -0.01 (0.05, 0.03)     | -0.009 | 0.025   | 0.700              | -0.01 (0.06, 0.04)      |
| 9044.1   | CNTNAP3  | Q8R9Y1  | 21   | 0.010                     | 0.012  | 0.410   | -0.01 (0.03, 0.01) | 0.689    | 0.088    | -0.035 | 0.024    | 0.152               | -0.04 (0.08, 0.01)       | 0.003  | 0.035      | -0.018        | 0.022     | 0.448              | -0.02 (0.06, 0.03)     | -0.009 | 0.023   | 0.687              | -0.01 (0.06, 0.04)      |
| 9361.7   | PCDH9L1  | Q8R9Y1  | 21   | 0.010                     | 0.012  | 0.410   | -0.01 (0.03, 0.01) | 0.689    | 0.088    | -0.035 | 0.024    | 0.152               | -0.04 (0.08, 0.01)       | 0.003  | 0.035      | -0.018        | 0.022     | 0.448              | -0.02 (0.06, 0.03)     | -0.009 | 0.023   | 0.687              | -0.01 (0.06, 0.04)      |
| 8913.22  | SIGLEC11 | Q8R9L6  | 21   | 0.010                     | 0.012  | 0.410   | -0.01 (0.03,       |          |          |        |          |                     |                          |        |            |               |           |                    |                        |        |         |                    |                         |

Table S3. Association of type 2 diabetes with deCODE plasma protein

| SNP       | Gene    | Chr    | BP | Inverse variance weighted |         |       |        | MR Egger      |         |       |        | Weighted mode |         |          |                | Weighted mode |         |        |        |       |       |                    |
|-----------|---------|--------|----|---------------------------|---------|-------|--------|---------------|---------|-------|--------|---------------|---------|----------|----------------|---------------|---------|--------|--------|-------|-------|--------------------|
|           |         |        |    | beta                      | se_beta | p_val | CI_low | beta          | se_beta | p_val | CI_low | beta          | se_beta | p_val    | CI_low         | beta          | se_beta | p_val  | CI_low |       |       |                    |
| 2578.87   | CCL2    | P13500 | 21 | 0.009                     | 0.012   | 0.453 | 0.01   | (0.01, 0.03)  | 0.723   | 0.107 | 0.000  | 0.225         | 0.094   | 1.99e-04 | (0.05, 0.05)   | 0.001         | 0.685   | -0.009 | 0.24   | 0.688 | -0.01 | (0.06, 0.04)       |
| 1202.2    | KREM2   | NR6900 | 21 | 0.009                     | 0.012   | 0.452 | 0.01   | (0.01, 0.03)  | 0.723   | 0.107 | 0.000  | 0.225         | 0.094   | 1.99e-04 | (0.05, 0.05)   | 0.001         | 0.685   | -0.009 | 0.24   | 0.688 | -0.01 | (0.06, 0.04)       |
| 3761.4    | PTGS2   | P35354 | 21 | -0.009                    | 0.012   | 0.453 | 0.01   | (-0.03, 0.01) | 0.723   | 0.108 | -0.000 | 0.224         | 0.091   | -0.008   | (-0.13, -0.03) | 0.004         | 0.001   | -0.042 | 0.19   | 0.028 | 0.04  | (-0.08, -0.50e-06) |
| 9053.16   | CRP2    | P29243 | 21 | -0.009                    | 0.012   | 0.453 | 0.01   | (-0.02, 0.03) | 0.723   | 0.104 | -0.004 | 0.225         | 0.084   | -0.04    | (-0.09, 0.01)  | 0.003         | 0.015   | -0.020 | 0.22   | 0.36  | -0.02 | (-0.02, -0.02)     |
| 9379.248  | EMR1D   | Q10921 | 21 | -0.009                    | 0.012   | 0.453 | 0.01   | (-0.01, 0.03) | 0.723   | 0.105 | -0.002 | 0.224         | 0.085   | -0.02    | (-0.07, 0.02)  | 0.002         | 0.022   | -0.032 | 0.22   | 0.42  | -0.03 | (-0.02, 0.02)      |
| 9893.27   | CAZ1    | P45388 | 21 | -0.009                    | 0.012   | 0.453 | 0.01   | (-0.03, 0.01) | 0.723   | 0.105 | -0.002 | 0.225         | 0.087   | -0.02    | (-0.07, 0.02)  | 0.002         | 0.022   | -0.032 | 0.22   | 0.42  | -0.03 | (-0.02, 0.02)      |
| 10273.22  | MATK    | Q10921 | 21 | -0.009                    | 0.012   | 0.453 | 0.01   | (-0.03, 0.01) | 0.723   | 0.105 | -0.002 | 0.225         | 0.087   | -0.02    | (-0.07, 0.02)  | 0.002         | 0.022   | -0.032 | 0.22   | 0.42  | -0.03 | (-0.02, 0.02)      |
| 10854.17  | LSMA    | OY4240 | 21 | -0.010                    | 0.014   | 0.454 | 0.01   | (-0.02, 0.04) | 0.723   | 0.106 | -0.004 | 0.224         | 0.086   | -0.04    | (-0.11, -0.04) | 0.002         | 0.005   | -0.014 | 0.23   | 0.538 | -0.01 | (-0.08, 0.03)      |
| 10858.77  | OPB2A   | Q29529 | 21 | -0.009                    | 0.012   | 0.454 | 0.01   | (-0.03, 0.01) | 0.723   | 0.106 | -0.004 | 0.224         | 0.086   | -0.04    | (-0.11, -0.04) | 0.002         | 0.005   | -0.014 | 0.23   | 0.538 | -0.01 | (-0.08, 0.03)      |
| 10931     | ANGPT1  | OY9525 | 21 | -0.009                    | 0.012   | 0.454 | 0.01   | (-0.03, 0.01) | 0.723   | 0.106 | -0.004 | 0.224         | 0.086   | -0.04    | (-0.11, -0.04) | 0.002         | 0.005   | -0.014 | 0.23   | 0.538 | -0.01 | (-0.08, 0.03)      |
| 11394.3   | SULT1A3 | P04988 | 21 | -0.009                    | 0.012   | 0.454 | 0.01   | (-0.03, 0.01) | 0.723   | 0.107 | -0.002 | 0.225         | 0.087   | -0.02    | (-0.07, 0.02)  | 0.001         | 0.497   | -0.047 | 0.20   | 0.032 | 0.05  | (-0.09, -0.99e-04) |
| 11399.7   | LAP3    | P28838 | 21 | -0.009                    | 0.012   | 0.455 | 0.01   | (-0.03, 0.01) | 0.723   | 0.107 | -0.002 | 0.225         | 0.087   | -0.02    | (-0.07, 0.02)  | 0.001         | 0.360   | -0.034 | 0.23   | 0.143 | -0.03 | (-0.08, 0.01)      |
| 11614.13  | PHL1    | Q10921 | 21 | -0.009                    | 0.012   | 0.455 | 0.01   | (-0.03, 0.01) | 0.723   | 0.107 | -0.002 | 0.225         | 0.087   | -0.02    | (-0.07, 0.02)  | 0.001         | 0.360   | -0.034 | 0.23   | 0.143 | -0.03 | (-0.08, 0.01)      |
| 11620.12  | SPN1    | OY9527 | 21 | -0.010                    | 0.013   | 0.455 | 0.01   | (-0.02, 0.04) | 0.723   | 0.103 | -0.003 | 0.226         | 0.083   | -0.04    | (-0.11, -0.04) | 0.002         | 0.020   | -0.010 | 0.23   | 0.675 | -0.01 | (-0.08, 0.04)      |
| 12027.22  | PAK6    | Q10921 | 21 | -0.009                    | 0.012   | 0.455 | 0.01   | (-0.03, 0.01) | 0.723   | 0.106 | -0.002 | 0.225         | 0.087   | -0.02    | (-0.07, 0.02)  | 0.001         | 0.448   | -0.038 | 0.22   | 0.078 | -0.04 | (-0.08, 0.04)      |
| 12754.11  | JAG1    | P07850 | 21 | -0.009                    | 0.012   | 0.455 | 0.01   | (-0.03, 0.01) | 0.723   | 0.104 | -0.002 | 0.225         | 0.087   | -0.02    | (-0.07, 0.02)  | 0.002         | 0.134   | -0.005 | 0.21   | 0.803 | -0.01 | (-0.08, 0.04)      |
| 8235.48   | CHGB    | Q10921 | 21 | -0.013                    | 0.017   | 0.455 | 0.01   | (-0.05, 0.02) | 0.723   | 0.106 | -0.004 | 0.224         | 0.086   | -0.04    | (-0.11, -0.04) | 0.001         | 0.671   | -0.033 | 0.23   | 0.899 | -0.03 | (-0.05, 0.01)      |
| 13029.27  | CROT    | Q10921 | 21 | -0.009                    | 0.012   | 0.455 | 0.01   | (-0.03, 0.01) | 0.723   | 0.106 | -0.002 | 0.225         | 0.087   | -0.02    | (-0.07, 0.02)  | 0.001         | 0.260   | -0.01  | 0.25   | 0.283 | -0.02 | (-0.07, 0.02)      |
| 13033.75  | ADAM22  | OP0101 | 21 | -0.009                    | 0.012   | 0.456 | 0.01   | (-0.03, 0.02) | 0.724   | 0.104 | -0.001 | 0.224         | 0.087   | -0.01    | (-0.04, 0.06)  | 0.001         | 0.339   | -0.000 | 0.25   | 1.000 | 0.00  | (-0.05, 0.01)      |
| 10580.14  | SFTA2   | OB0100 | 21 | -0.009                    | 0.012   | 0.457 | 0.01   | (-0.03, 0.02) | 0.724   | 0.103 | -0.002 | 0.224         | 0.087   | -0.01    | (-0.04, 0.06)  | 0.002         | 0.067   | 0.001  | 0.21   | 0.973 | 0.07  | (-0.04, -0.04)     |
| 11444.49  | POLR3F  | Q10921 | 21 | -0.009                    | 0.012   | 0.457 | 0.01   | (-0.03, 0.02) | 0.724   | 0.103 | -0.002 | 0.224         | 0.087   | -0.01    | (-0.04, 0.06)  | 0.002         | 0.067   | 0.001  | 0.21   | 0.973 | 0.07  | (-0.04, -0.04)     |
| 12504.28  | LMO1    | P29536 | 21 | -0.009                    | 0.012   | 0.457 | 0.01   | (-0.03, 0.02) | 0.724   | 0.103 | -0.002 | 0.224         | 0.087   | -0.01    | (-0.04, 0.06)  | 0.003         | 0.009   | -0.016 | 0.22   | 0.448 | -0.02 | (-0.06, 0.03)      |
| 12623.24  | TMC6    | Q10921 | 21 | -0.009                    | 0.012   | 0.457 | 0.01   | (-0.03, 0.02) | 0.724   | 0.103 | -0.002 | 0.224         | 0.087   | -0.01    | (-0.04, 0.06)  | 0.001         | 0.455   | -0.017 | 0.21   | 0.999 | -0.02 | (-0.06, 0.03)      |
| 8004.15   | GAD65   | O14556 | 21 | -0.009                    | 0.012   | 0.457 | 0.01   | (-0.03, 0.02) | 0.724   | 0.109 | -0.007 | 0.224         | 0.086   | -0.04    | (-0.06, 0.04)  | 0.001         | 0.446   | -0.015 | 0.23   | 0.507 | -0.02 | (-0.06, 0.03)      |
| 13245.17  | KCNK4   | Q10921 | 21 | -0.010                    | 0.013   | 0.457 | 0.01   | (-0.03, 0.02) | 0.725   | 0.107 | -0.005 | 0.226         | 0.083   | -0.05    | (-0.10, -0.04) | 0.004         | 0.008   | -0.024 | 0.22   | 0.284 | -0.02 | (-0.07, 0.02)      |
| 10530.8   | PSMB8   | P29072 | 21 | -0.009                    | 0.012   | 0.458 | 0.01   | (-0.03, 0.01) | 0.725   | 0.110 | -0.001 | 0.224         | 0.086   | -0.01    | (-0.06, 0.02)  | 0.002         | 0.064   | -0.014 | 0.22   | 0.529 | -0.01 | (-0.06, 0.03)      |
| 12794.6   | NLRP4   | O96922 | 21 | -0.010                    | 0.013   | 0.458 | 0.01   | (-0.03, 0.02) | 0.725   | 0.109 | -0.003 | 0.225         | 0.083   | -0.03    | (-0.10, -0.04) | 0.004         | 0.004   | -0.024 | 0.22   | 0.284 | -0.02 | (-0.07, 0.02)      |
| 13452.113 | SMX1    | P0D303 | 21 | -0.009                    | 0.012   | 0.458 | 0.01   | (-0.03, 0.01) | 0.725   | 0.107 | -0.002 | 0.225         | 0.083   | -0.02    | (-0.07, 0.02)  | 0.004         | 0.008   | -0.024 | 0.22   | 0.284 | -0.02 | (-0.07, 0.02)      |
| 8235.95   | SRFBP1  | Q10921 | 21 | -0.009                    | 0.012   | 0.458 | 0.01   | (-0.03, 0.01) | 0.725   | 0.107 | -0.002 | 0.225         | 0.083   | -0.02    | (-0.07, 0.02)  | 0.004         | 0.008   | -0.024 | 0.22   | 0.284 | -0.02 | (-0.07, 0.02)      |
| 8528.95   | EXTL2   | Q10921 | 21 | -0.009                    | 0.013   | 0.458 | 0.01   | (-0.03, 0.02) | 0.725   | 0.103 | -0.002 | 0.225         | 0.083   | -0.02    | (-0.07, 0.02)  | 0.004         | 0.003   | -0.025 | 0.22   | 0.245 | -0.03 | (-0.06, 0.03)      |
| 8598.8    | STK17B  | Q10921 | 21 | -0.009                    | 0.013   | 0.458 | 0.01   | (-0.03, 0.02) | 0.725   | 0.103 | -0.002 | 0.225         | 0.083   | -0.02    | (-0.07, 0.02)  | 0.004         | 0.003   | -0.025 | 0.22   | 0.245 | -0.03 | (-0.06, 0.03)      |
| 8917.9    | NRXN1   | Q10921 | 21 | -0.011                    | 0.015   | 0.459 | 0.01   | (-0.02, 0.04) | 0.725   | 0.103 | -0.004 | 0.224         | 0.083   | -0.04    | (-0.06, 0.06)  | 0.000         | 0.785   | -0.028 | 0.20   | 0.171 | -0.03 | (-0.07, 0.01)      |
| 12689.30  | HECW1   | Q10921 | 21 | -0.009                    | 0.013   | 0.459 | 0.01   | (-0.03, 0.02) | 0.725   | 0.103 | -0.004 | 0.224         | 0.083   | -0.04    | (-0.06, 0.06)  | 0.004         | 0.002   | -0.006 | 0.21   | 0.770 | -0.01 | (-0.05, 0.04)      |
| 9642.2    | CTNNA1  | Q10921 | 21 | -0.009                    | 0.013   | 0.459 | 0.01   | (-0.03, 0.02) | 0.725   | 0.103 | -0.004 | 0.224         | 0.083   | -0.04    | (-0.06, 0.06)  | 0.004         | 0.002   | -0.006 | 0.21   | 0.770 | -0.01 | (-0.05, 0.04)      |
| 11482.8   | RFX2    | Q13251 | 21 | -0.009                    | 0.013   | 0.459 | 0.01   | (-0.03, 0.02) | 0.725   | 0.103 | -0.004 | 0.224         | 0.083   | -0.04    | (-0.06, 0.06)  | 0.004         | 0.002   | -0.006 | 0.21   | 0.770 | -0.01 | (-0.05, 0.04)      |
| 9086.3    | CD55    | Q13251 | 21 | -0.009                    | 0.013   | 0.459 | 0.01   | (-0.03, 0.02) | 0.725   | 0.103 | -0.004 | 0.224         | 0.083   | -0.04    | (-0.06, 0.06)  | 0.004         | 0.002   | -0.006 | 0.21   | 0.770 | -0.01 | (-0.05, 0.04)      |
| 9086.3    | CD55    | Q13251 | 21 | -0.009                    | 0.013   | 0.459 | 0.01   | (-0.03, 0.02) | 0.725   | 0.103 | -0.004 | 0.224         | 0.083   | -0.04    | (-0.06, 0.06)  | 0.004         | 0.002   | -0.006 | 0.21   | 0.770 | -0.01 | (-0.05, 0.04)      |
| 9086.3    | CD55    | Q13251 | 21 | -0.009                    | 0.013   | 0.459 | 0.01   | (-0.03, 0.02) | 0.725   | 0.103 | -0.004 | 0.224         | 0.083   | -0.04    | (-0.06, 0.06)  | 0.004         | 0.002   | -0.006 | 0.21   | 0.770 | -0.01 | (-0.05, 0.04)      |
| 9086.3    | CD55    | Q13251 | 21 | -0.009                    | 0.013   | 0.459 | 0.01   | (-0.03, 0.02) | 0.725   | 0.103 | -0.004 | 0.224         | 0.083   | -0.04    | (-0.06, 0.06)  | 0.004         | 0.002   | -0.006 | 0.21   | 0.770 | -0.01 | (-0.05, 0.04)      |
| 9086.3    | CD55    | Q13251 | 21 | -0.009                    | 0.013   | 0.459 | 0.01   | (-0.03, 0.02) | 0.725   | 0.103 | -0.004 | 0.224         | 0.083   | -0.04    | (-0.06, 0.06)  | 0.004         | 0.002   | -0.006 | 0.21   | 0.770 | -0.01 | (-0.05, 0.04)      |
| 9086.3    | CD55    | Q13251 | 21 | -0.009                    | 0.013   | 0.459 | 0.01   | (-0.03, 0.02) | 0.725   | 0.103 | -0.004 | 0.224         | 0.083   | -0.04    | (-0.06, 0.06)  | 0.004         | 0.002   | -0.006 | 0.21   | 0.770 | -0.01 | (-0.05, 0.04)      |
| 9086.3    | CD55    | Q13251 | 21 | -0.009                    | 0.013   | 0.459 | 0.01   | (-0.03, 0.02) | 0.725   | 0.103 | -0.004 | 0.224         | 0.083   | -0.04    | (-0.06, 0.06)  | 0.004         | 0.002   | -0.006 | 0.21   | 0.770 | -0.01 | (-0.05, 0.04)      |
| 9086.3    | CD55    | Q13251 | 21 | -0.009                    | 0.013   | 0.459 | 0.01   | (-0.03, 0.02) | 0.725   | 0.103 | -0.004 | 0.224         | 0.083   | -0.04    | (-0.06, 0.06)  | 0.004         | 0.002   | -0.006 | 0.21   | 0.770 | -0.01 | (-0.05, 0.04)      |
| 9086.3    | CD55    | Q13251 | 21 | -0.009                    | 0.013   | 0.459 | 0.01   | (-0.03, 0.02) | 0.725   | 0.103 | -0.004 | 0.224         | 0.083   | -0.04    | (-0.06, 0.06)  | 0.004         | 0.002   | -0.006 | 0.21   | 0.770 | -0.01 | (-0.05, 0.04)      |
| 9086.3    | CD55    | Q13251 | 21 | -0.009                    | 0.013   | 0.459 | 0.01   | (-0.03, 0.02) | 0.725   | 0.103 | -0.004 | 0.224         | 0.083   | -0.04    | (-0.06, 0.06)  | 0.004         | 0.002   | -0.006 | 0.21   | 0.770 | -0.01 | (-0.05, 0.04)      |
| 9086.3    | CD55    | Q13251 | 21 | -0.009                    | 0.013   | 0.459 | 0.01   | (-0.03, 0.02) | 0.725   | 0.103 | -0.004 | 0.224         | 0.083   | -0.04    | (-0.06, 0.06)  | 0.004         | 0.002   | -0.006 | 0.21   | 0.770 | -0.01 | (-0.05, 0.04)      |
| 9086.3    | CD55    | Q13251 | 21 | -0.009                    | 0.013   | 0.459 | 0.01   | (-0.03, 0.02) | 0.725   | 0.103 | -0.004 | 0.224         | 0.083   | -0.04    | (-0.06, 0.06)  | 0.004         | 0.002   | -0.006 | 0.21   | 0.770 | -0.01 | (-0.05, 0.04)      |
| 9086.3    | CD55    | Q13251 | 21 | -0.009                    | 0.013   | 0.459 | 0.01   | (-0.03, 0.02) | 0.725   | 0.103 | -0.004 | 0.224         | 0.083   | -0.04    | (-0.06, 0.06)  | 0.004         | 0.002   | -0.006 | 0.21   | 0.770 | -0.01 | (-0.05, 0.04)      |
| 9086.3    | CD55    | Q13251 | 21 | -0.009                    | 0.013   | 0.459 | 0.01   | (-0.03, 0.02) | 0.725   | 0.103 | -0.004 | 0.224         | 0.083   | -0.04    | (-0.06, 0.06)  | 0.004         | 0.002   | -0.006 | 0.21   | 0.770 | -0.01 |                    |

Table S3. Association of type 2 diabetes with deCODE plasma protein

| SNP       | Gene    | UTP    | nsnp | bw     | se_bw | prval | CI_low              | CI_high | FDR_low  | Q_val  | bagger | se_bagger                  | prval                    | CI_low                   | CI_high | egger  | Interegger | prval              | se_median               | prval               | CI_low             | CI_high                 | b_mode              | se_mode | prval              | CI_low                  | CI_high             |                     |        |
|-----------|---------|--------|------|--------|-------|-------|---------------------|---------|----------|--------|--------|----------------------------|--------------------------|--------------------------|---------|--------|------------|--------------------|-------------------------|---------------------|--------------------|-------------------------|---------------------|---------|--------------------|-------------------------|---------------------|---------------------|--------|
| 160472    | GRAP2   | PT5791 | 21   | 0.008  | 0.102 | 0.503 | 0.01 (-0.02, 0.03)  | 0.755   | 0.448    | 0.304  | 0.025  | 0.167                      | 0.03 (-0.08, 0.01)       | 0.003                    | 0.049   | 0.021  | 0.020      | 0.294              | 0.02 (-0.02, 0.02)      | 0.003               | 0.294              | 0.02 (-0.02, 0.02)      | -0.035              | 0.025   | 0.173              | 0.03 (-0.08, 0.01)      | 0.003               |                     |        |
| 14599_77  | L1B     | 209687 | 21   | 0.008  | 0.102 | 0.503 | 0.01 (-0.02, 0.03)  | 0.755   | 0.448    | 0.304  | 0.025  | 0.167                      | 0.03 (-0.08, 0.01)       | 0.003                    | 0.049   | 0.021  | 0.020      | 0.294              | 0.02 (-0.02, 0.02)      | 0.003               | 0.294              | 0.02 (-0.02, 0.02)      | -0.035              | 0.025   | 0.173              | 0.03 (-0.08, 0.01)      | 0.003               |                     |        |
| 5621_64   | THSD1   | QNS582 | 21   | 0.008  | 0.102 | 0.503 | 0.01 (-0.02, 0.03)  | 0.755   | 0.448    | 0.304  | 0.025  | 0.167                      | 0.03 (-0.08, 0.01)       | 0.003                    | 0.049   | 0.021  | 0.020      | 0.294              | 0.02 (-0.02, 0.02)      | 0.003               | 0.294              | 0.02 (-0.02, 0.02)      | -0.035              | 0.025   | 0.173              | 0.03 (-0.08, 0.01)      | 0.003               |                     |        |
| 7035_81   | NESD1   | QZ381  | 21   | 0.011  | 0.016 | 0.002 | -0.01 (-0.04, 0.02) | 0.755   | 2.09E-10 | 0.016  | 0.032  | 0.680                      | 0.02 (-0.05, 0.04)       | 0.002                    | 0.344   | 0.007  | 0.026      | 0.761              | 0.01 (-0.04, 0.04)      | 0.002               | 0.761              | 0.01 (-0.04, 0.04)      | 0.007               | 0.026   | 0.761              | 0.01 (-0.04, 0.04)      | 0.002               |                     |        |
| 10430_31  | BCL2L2  | Q81945 | 21   | 0.008  | 0.102 | 0.503 | 0.01 (-0.02, 0.03)  | 0.755   | 0.602    | -0.049 | 0.023  | 0.036                      | -0.05 (-0.09, -3.2E-02)  | 0.004                    | 0.005   | -0.025 | 0.022      | 0.255              | 0.02 (-0.07, 0.02)      | 0.019               | 0.255              | 0.02 (-0.07, 0.02)      | -0.019              | 0.024   | 0.255              | 0.02 (-0.07, 0.02)      | 0.019               |                     |        |
| 5037_82   | L1B     | 209687 | 21   | 0.008  | 0.102 | 0.503 | 0.01 (-0.02, 0.03)  | 0.755   | 0.448    | 0.304  | 0.025  | 0.167                      | 0.03 (-0.08, 0.01)       | 0.003                    | 0.049   | 0.021  | 0.020      | 0.294              | 0.02 (-0.02, 0.02)      | 0.003               | 0.294              | 0.02 (-0.02, 0.02)      | -0.035              | 0.025   | 0.173              | 0.03 (-0.08, 0.01)      | 0.003               |                     |        |
| 109243_1  | BCL2L2  | Q81945 | 21   | 0.008  | 0.102 | 0.503 | 0.01 (-0.02, 0.03)  | 0.755   | 0.602    | -0.049 | 0.023  | 0.036                      | -0.05 (-0.09, -3.2E-02)  | 0.004                    | 0.005   | -0.025 | 0.022      | 0.255              | 0.02 (-0.07, 0.02)      | 0.019               | 0.255              | 0.02 (-0.07, 0.02)      | -0.019              | 0.024   | 0.255              | 0.02 (-0.07, 0.02)      | 0.019               |                     |        |
| 18905_5   | KRT16   | OR8779 | 21   | 0.008  | 0.102 | 0.503 | 0.01 (-0.02, 0.03)  | 0.755   | 0.423    | 0.006  | 0.023  | 0.789                      | 0.01 (-0.04, 0.05)       | 0.000                    | 0.940   | 0.014  | 0.020      | 0.175              | 0.01 (-0.05, 0.02)      | 0.010               | 0.175              | 0.01 (-0.05, 0.02)      | 0.010               | 0.023   | 0.175              | 0.01 (-0.05, 0.02)      | 0.010               |                     |        |
| 16407_35  | TNKS1   | Q45378 | 21   | 0.008  | 0.102 | 0.503 | 0.01 (-0.02, 0.03)  | 0.755   | 0.423    | 0.006  | 0.023  | 0.789                      | 0.01 (-0.04, 0.05)       | 0.000                    | 0.940   | 0.014  | 0.020      | 0.175              | 0.01 (-0.05, 0.02)      | 0.010               | 0.175              | 0.01 (-0.05, 0.02)      | 0.010               | 0.023   | 0.175              | 0.01 (-0.05, 0.02)      | 0.010               |                     |        |
| 168520_10 | PDZK1   | Q521W1 | 21   | 0.008  | 0.102 | 0.503 | 0.01 (-0.02, 0.03)  | 0.755   | 0.053    | -0.057 | 0.025  | 0.02 (-0.06, -0.11, -0.01) | 0.004                    | 0.005                    | -0.029  | 0.022  | 0.145      | 0.03 (-0.07, 0.01) | 0.021                   | 0.145               | 0.03 (-0.07, 0.01) | -0.021                  | 0.022               | 0.145   | 0.03 (-0.07, 0.01) | 0.021                   |                     |                     |        |
| 18841_1   | SRPNBL1 | Q8U878 | 21   | 0.009  | 0.104 | 0.506 | 0.01 (-0.04, 0.02)  | 0.757   | 0.001    | 0.011  | 0.027  | 0.695                      | -0.01 (-0.06, 0.04)      | 0.000                    | 0.945   | -0.026 | 0.026      | 0.312              | -0.03 (-0.02, 0.02)     | -0.033              | 0.312              | -0.03 (-0.02, 0.02)     | -0.033              | 0.024   | 0.312              | -0.03 (-0.02, 0.02)     | -0.033              |                     |        |
| 10207_19  | AKC     | Q55263 | 21   | 0.009  | 0.104 | 0.506 | 0.01 (-0.04, 0.02)  | 0.757   | 0.001    | 0.011  | 0.027  | 0.695                      | -0.01 (-0.06, 0.04)      | 0.000                    | 0.945   | -0.026 | 0.026      | 0.312              | -0.03 (-0.02, 0.02)     | -0.033              | 0.312              | -0.03 (-0.02, 0.02)     | -0.033              | 0.024   | 0.312              | -0.03 (-0.02, 0.02)     | -0.033              |                     |        |
| 8259_9    | LYSG6   | Q8U878 | 21   | -0.009 | 0.103 | 0.506 | 0.01 (-0.03, 0.02)  | 0.757   | 0.036    | -0.066 | 0.025  | 0.009                      | -0.07 (-0.11, -0.02)     | 0.004                    | 0.009   | -0.043 | 0.020      | 0.034              | 0.04 (-0.08, -3.34E-04) | 0.044               | 0.034              | 0.04 (-0.08, -3.34E-04) | 0.044               | 0.025   | 0.034              | 0.04 (-0.08, -3.34E-04) | 0.044               |                     |        |
| 9695_5    | MTR1    | Q15360 | 21   | 0.009  | 0.103 | 0.505 | 0.01 (-0.03, 0.02)  | 0.757   | 0.047    | -0.049 | 0.025  | 0.05 (-0.05, 0.10, -0.02)  | 0.003                    | 0.057                    | -0.028  | 0.020  | 0.161      | 0.03 (-0.07, 0.01) | -0.043                  | 0.161               | 0.03 (-0.07, 0.01) | -0.043                  | 0.022               | 0.161   | 0.03 (-0.07, 0.01) | -0.043                  |                     |                     |        |
| 2966_65   | PCLP1   | Q9Y240 | 21   | 0.010  | 0.104 | 0.508 | 0.01 (-0.02, 0.04)  | 0.758   | 2.14E-04 | 0.024  | 0.029  | 0.411                      | 0.02 (-0.02, 0.03, 0.08) | -0.001                   | 0.571   | -0.003 | 0.025      | 0.904              | 0.298 (-0.05, 0.01)     | -0.008              | 0.298              | 0.298 (-0.05, 0.01)     | -0.008              | 0.022   | 0.298              | 0.298 (-0.05, 0.01)     | -0.008              |                     |        |
| 12882_7   | PANP1   | Q81211 | 21   | 0.008  | 0.102 | 0.508 | 0.01 (-0.02, 0.03)  | 0.758   | 0.198    | 0.027  | 0.024  | 0.017                      | -0.06 (-0.10, -0.01)     | 0.004                    | 0.002   | 0.013  | 0.022      | 0.566              | 0.01 (-0.06, 0.03)      | -0.011              | 0.566              | 0.01 (-0.06, 0.03)      | -0.011              | 0.024   | 0.566              | 0.01 (-0.06, 0.03)      | -0.011              |                     |        |
| 19536_24  | SCDH    | Q45378 | 21   | 0.008  | 0.102 | 0.508 | 0.01 (-0.02, 0.03)  | 0.758   | 0.191    | 0.023  | 0.023  | 0.087                      | -0.04 (-0.08, 0.01)      | 0.003                    | 0.019   | -0.005 | 0.025      | 0.853              | -0.04 (-0.08, 0.01)     | -0.007              | 0.853              | -0.04 (-0.08, 0.01)     | -0.007              | 0.024   | 0.853              | -0.04 (-0.08, 0.01)     | -0.007              |                     |        |
| 3171_57   | APC     | P50587 | 21   | -0.010 | 0.104 | 0.508 | 0.01 (-0.04, 0.02)  | 0.759   | 2.83E-05 | -0.039 | 0.029  | 0.175                      | 0.04 (-0.10, 0.02)       | 0.002                    | 0.236   | -0.041 | 0.024      | 0.087              | 0.04 (-0.08, 0.01)      | -0.048              | 0.087              | 0.04 (-0.08, 0.01)      | -0.048              | 0.025   | 0.087              | 0.04 (-0.08, 0.01)      | -0.048              |                     |        |
| 16257_14  | ROBO4   | Q8W276 | 21   | 0.008  | 0.102 | 0.508 | 0.01 (-0.01, 0.03)  | 0.759   | 0.338    | 0.112  | 0.023  | 0.023                      | 0.823                    | 0.01 (-0.01, 0.03, 0.06) | 0.000   | 0.848  | -0.002     | 0.025              | 0.813                   | -0.06 (-0.05, 0.01) | -0.003             | 0.813                   | -0.06 (-0.05, 0.01) | -0.003  | 0.025              | 0.813                   | -0.06 (-0.05, 0.01) | -0.003              |        |
| 11352_8   | BTIC2   | P43489 | 21   | 0.008  | 0.102 | 0.508 | 0.01 (-0.02, 0.04)  | 0.759   | 0.001    | 0.027  | 0.027  | 0.186                      | 0.03 (-0.01, -4.1E-02)   | 0.004                    | 0.005   | -0.029 | 0.022      | 0.648              | 0.03 (-0.07, 0.01)      | -0.021              | 0.648              | 0.03 (-0.07, 0.01)      | -0.021              | 0.024   | 0.648              | 0.03 (-0.07, 0.01)      | -0.021              |                     |        |
| 14675_20  | PC3     | P23588 | 21   | -0.009 | 0.103 | 0.509 | 0.01 (-0.03, 0.02)  | 0.760   | 0.032    | -0.051 | 0.026  | 0.048                      | -0.05 (-0.10, -3.8E-02)  | 0.003                    | 0.056   | -0.051 | 0.020      | 0.012              | 0.05 (-0.09, -0.01)     | -0.063              | 0.056              | 0.012                   | 0.05 (-0.09, -0.01) | -0.063  | 0.028              | 0.056                   | 0.012               | 0.05 (-0.09, -0.01) | -0.063 |
| 5730_81   | TNFRSF4 | P43489 | 21   | 0.008  | 0.102 | 0.509 | 0.01 (-0.02, 0.03)  | 0.761   | 0.454    | 0.031  | 0.023  | 0.186                      | 0.03 (-0.08, 0.01)       | 0.002                    | 0.056   | -0.016 | 0.020      | 0.244              | 0.02 (-0.05, 0.02)      | -0.028              | 0.244              | 0.02 (-0.05, 0.02)      | -0.028              | 0.028   | 0.244              | 0.02 (-0.05, 0.02)      | -0.028              |                     |        |
| 12825_28  | VAV1    | P15488 | 21   | 0.008  | 0.102 | 0.510 | 0.01 (-0.03, 0.02)  | 0.761   | 0.117    | -0.027 | 0.025  | 0.281                      | 0.03 (-0.08, 0.02)       | 0.001                    | 0.376   | -0.038 | 0.022      | 0.084              | 0.04 (-0.08, 0.01)      | -0.039              | 0.376              | 0.04 (-0.08, 0.01)      | -0.039              | 0.028   | 0.376              | 0.04 (-0.08, 0.01)      | -0.039              |                     |        |
| 11568_2   | PKSFB   | P81806 | 21   | -0.009 | 0.103 | 0.510 | 0.01 (-0.03, 0.02)  | 0.761   | 0.016    | -0.040 | 0.026  | 0.127                      | -0.04 (-0.09, 0.01)      | 0.002                    | 0.167   | -0.032 | 0.023      | 0.170              | 0.03 (-0.08, 0.01)      | -0.035              | 0.167              | 0.03 (-0.08, 0.01)      | -0.035              | 0.022   | 0.167              | 0.03 (-0.08, 0.01)      | -0.035              |                     |        |
| 14693_10  | FTL3    | P48771 | 21   | 0.008  | 0.102 | 0.510 | 0.01 (-0.02, 0.03)  | 0.761   | 0.208    | 0.041  | 0.026  | 0.087                      | -0.04 (-0.08, 0.01)      | 0.003                    | 0.019   | -0.005 | 0.025      | 0.853              | -0.04 (-0.08, 0.01)     | -0.007              | 0.853              | -0.04 (-0.08, 0.01)     | -0.007              | 0.024   | 0.853              | -0.04 (-0.08, 0.01)     | -0.007              |                     |        |
| 17366_341 | EEF1D   | P29682 | 21   | -0.009 | 0.103 | 0.510 | 0.01 (-0.03, 0.02)  | 0.761   | 0.056    | -0.031 | 0.026  | 0.222                      | -0.04 (-0.08, 0.02)      | 0.001                    | 0.290   | -0.051 | 0.020      | 0.170              | 0.05 (-0.09, -0.01)     | -0.050              | 0.290              | 0.05 (-0.09, -0.01)     | -0.050              | 0.027   | 0.290              | 0.05 (-0.09, -0.01)     | -0.050              |                     |        |
| 15322_39  | CRADD   | P78520 | 21   | 0.009  | 0.103 | 0.511 | 0.01 (-0.02, 0.03)  | 0.761   | 0.030    | -0.013 | 0.026  | 0.608                      | -0.01 (-0.06, 0.04)      | 0.001                    | 0.330   | -0.020 | 0.022      | 0.368              | -0.02 (-0.07, 0.02)     | -0.021              | 0.368              | -0.02 (-0.07, 0.02)     | -0.021              | 0.024   | 0.368              | -0.02 (-0.07, 0.02)     | -0.021              |                     |        |
| 16969_15  | COL2A1  | P15488 | 21   | 0.009  | 0.103 | 0.511 | 0.01 (-0.02, 0.03)  | 0.761   | 0.001    | 0.019  | 0.027  | 0.608                      | -0.01 (-0.06, 0.04)      | 0.001                    | 0.330   | -0.020 | 0.022      | 0.368              | -0.02 (-0.07, 0.02)     | -0.021              | 0.368              | -0.02 (-0.07, 0.02)     | -0.021              | 0.024   | 0.368              | -0.02 (-0.07, 0.02)     | -0.021              |                     |        |
| 11402_17  | MTC2    | Q8W824 | 21   | 0.008  | 0.102 | 0.512 | 0.01 (-0.02, 0.03)  | 0.761   | 0.144    | 0.041  | 0.024  | 0.090                      | 0.04 (-0.09, 0.01)       | 0.003                    | 0.020   | -0.025 | 0.021      | 0.252              | 0.02 (-0.07, 0.02)      | -0.024              | 0.252              | 0.02 (-0.07, 0.02)      | -0.024              | 0.024   | 0.252              | 0.02 (-0.07, 0.02)      | -0.024              |                     |        |
| 14192_9   | TRAF3   | Q15360 | 21   | 0.009  | 0.104 | 0.509 | 0.01 (-0.03, 0.02)  | 0.761   | 0.001    | 0.011  | 0.027  | 0.695                      | -0.01 (-0.06, 0.04)      | 0.000                    | 0.945   | -0.026 | 0.026      | 0.312              | -0.03 (-0.02, 0.02)     | -0.033              | 0.312              | -0.03 (-0.02, 0.02)     | -0.033              | 0.024   | 0.312              | -0.03 (-0.02, 0.02)     | -0.033              |                     |        |
| 15414_316 | LHDA    | P00338 | 21   | 0.009  | 0.104 | 0.512 | 0.01 (-0.02, 0.04)  | 0.761   | 2.80E-04 | -0.035 | 0.028  | 0.211                      | 0.03 (-0.09, 0.02)       | 0.003                    | 0.067   | -0.023 | 0.023      | 0.331              | 0.03 (-0.07, 0.02)      | -0.028              | 0.331              | 0.03 (-0.07, 0.02)      | -0.028              | 0.028   | 0.331              | 0.03 (-0.07, 0.02)      | -0.028              |                     |        |
| 18237_29  | NR3C3   | Q8U878 | 21   | 0.008  | 0.102 | 0.511 | 0.01 (-0.02, 0.03)  | 0.761   | 0.083    | -0.055 | 0.024  | 0.030                      | -0.05 (-0.10, -0.01)     | 0.004                    | 0.004   | -0.037 | 0.021      | 0.080              | 0.04 (-0.08, -4.37E-04) | -0.029              | 0.080              | 0.04 (-0.08, -4.37E-04) | -0.029              | 0.023   | 0.080              | 0.04 (-0.08, -4.37E-04) | -0.029              |                     |        |
| 3656_7    | WVF     | Q15360 | 21   | 0.009  | 0.104 | 0.512 | 0.01 (-0.03, 0.02)  | 0.761   | 0.043    | -0.031 | 0.024  | 0.176                      | 0.04 (-0.09, 0.01)       | 0.003                    | 0.076   | -0.041 | 0.020      | 0.433              | 0.01 (-0.06, 0.03)      | -0.029              | 0.433              | 0.01 (-0.06, 0.03)      | -0.029              | 0.028   | 0.433              | 0.01 (-0.06, 0.03)      | -0.029              |                     |        |
| 3356_50   | CAT     | P43166 | 21   | 0.008  | 0.102 | 0.512 | 0.01 (-0.02, 0.03)  | 0.761   | 0.258    | 0.116  | 0.024  | 0.517                      | -0.02 (-0.06, 0.03)      | 0.001                    | 0.262   | -0.012 | 0.022      | 0.574              | 0.01 (-0.06, 0.03)      | -0.014              | 0.574              | 0.01 (-0.06, 0.03)      | -0.014              | 0.028   | 0.574              | 0.01 (-0.06, 0.03)      | -0.014              |                     |        |
| 8400_1    | NMES1   | Q8U878 | 21   | 0.008  | 0.102 | 0.512 | 0.01 (-0.02, 0.03)  | 0.761   | 0.142    | -0.034 | 0.025  | 0.189                      | -0.03 (-0.08, 0.01)      | 0.002                    | 0.219   | -0.025 | 0.024      | 0.252              | 0.02 (-0.07, 0.02)      | -0.024              | 0.252              | 0.02 (-0.07, 0.02)      | -0.024              | 0.024   | 0.252              | 0.02 (-0.07, 0.02)      | -0.024              |                     |        |
| 14645_253 | GSTA4   | P23588 | 21   | 0.009  | 0.103 | 0.512 | 0.01 (-0.02, 0.04)  | 0.761   | 0.001    | 0.011  | 0.027  | 0.695                      | -0.01 (-0.06, 0.04)      | 0.000                    | 0.945   | -0.026 | 0.026      | 0.312              | -0.03 (-0.02, 0.02)     | -0.033              | 0.312              | -0.03 (-0.02, 0.02)     | -0.033              | 0.024   | 0.312              | -0.03 (-0.02, 0.02)     | -0.033</            |                     |        |





Table S3. Association of type 2 diabetes with deCODE plasma protein

| SNP      | Gene     | Uniprot | nsnp | bw     | sv    | pr    | cl                 | MD    | Weighted mode | Weighted mode |       |       |                         |       |       |        |       |       |                       |        |       |       |                        |
|----------|----------|---------|------|--------|-------|-------|--------------------|-------|---------------|---------------|-------|-------|-------------------------|-------|-------|--------|-------|-------|-----------------------|--------|-------|-------|------------------------|
| rsid     |          |         |      |        |       |       |                    |       |               |               |       |       |                         |       |       |        |       |       |                       |        |       |       |                        |
|          |          |         |      |        |       |       |                    |       |               |               |       |       |                         |       |       |        |       |       |                       |        |       |       |                        |
| 3535_34  | DKKI1    | ENR007  | 211  | -0.007 | 0.015 | 0.859 | -0.01 (0.04, 0.02) | 0.841 | 1.99E-05      | 0.046         | 0.229 | 0.115 | -0.05 (0.10, 0.01)      | 0.003 | 0.117 | -0.035 | 0.24  | 0.137 | -0.04 (0.08, 0.01)    | -0.038 | 0.205 | 0.158 | -0.04 (0.08, 0.01)     |
| 7705_29  | SH3BP2   |         | 211  | 0.005  | 0.012 | 0.859 | 0.01 (0.02, 0.03)  | 0.841 | 1.99E-05      | 0.046         | 0.229 | 0.115 | -0.05 (0.10, 0.01)      | 0.003 | 0.117 | -0.035 | 0.24  | 0.137 | -0.04 (0.08, 0.01)    | -0.038 | 0.205 | 0.158 | -0.04 (0.08, 0.01)     |
| 8053_16  | DNAH1B   | ENR0188 | 211  | 0.005  | 0.012 | 0.859 | 0.01 (0.02, 0.03)  | 0.841 | 1.99E-05      | 0.046         | 0.229 | 0.115 | -0.05 (0.10, 0.01)      | 0.003 | 0.117 | -0.035 | 0.24  | 0.137 | -0.04 (0.08, 0.01)    | -0.038 | 0.205 | 0.158 | -0.04 (0.08, 0.01)     |
| 8347_222 | DNAAF1   | ENR0188 | 211  | 0.005  | 0.012 | 0.859 | 0.01 (0.02, 0.03)  | 0.841 | 1.99E-05      | 0.046         | 0.229 | 0.115 | -0.05 (0.10, 0.01)      | 0.003 | 0.117 | -0.035 | 0.24  | 0.137 | -0.04 (0.08, 0.01)    | -0.038 | 0.205 | 0.158 | -0.04 (0.08, 0.01)     |
| 12545_18 | SNK1     |         | 211  | 0.005  | 0.012 | 0.859 | 0.01 (0.02, 0.03)  | 0.841 | 1.99E-05      | 0.046         | 0.229 | 0.115 | -0.05 (0.10, 0.01)      | 0.003 | 0.117 | -0.035 | 0.24  | 0.137 | -0.04 (0.08, 0.01)    | -0.038 | 0.205 | 0.158 | -0.04 (0.08, 0.01)     |
| 9713_67  | PQDRLR   | Q15198  | 211  | 0.005  | 0.012 | 0.859 | 0.01 (0.02, 0.03)  | 0.841 | 1.99E-05      | 0.046         | 0.229 | 0.115 | -0.05 (0.10, 0.01)      | 0.003 | 0.117 | -0.035 | 0.24  | 0.137 | -0.04 (0.08, 0.01)    | -0.038 | 0.205 | 0.158 | -0.04 (0.08, 0.01)     |
| 10177_52 | GRP94    |         | 211  | 0.005  | 0.012 | 0.859 | 0.01 (0.02, 0.03)  | 0.841 | 1.99E-05      | 0.046         | 0.229 | 0.115 | -0.05 (0.10, 0.01)      | 0.003 | 0.117 | -0.035 | 0.24  | 0.137 | -0.04 (0.08, 0.01)    | -0.038 | 0.205 | 0.158 | -0.04 (0.08, 0.01)     |
| 12711_19 | GJAB     | P48165  | 211  | 0.005  | 0.011 | 0.862 | 0.01 (0.02, 0.03)  | 0.843 | 0.240         | -0.048        | 0.023 | 0.400 | -0.05 (0.10, 0.01)      | 0.003 | 0.079 | -0.004 | 0.023 | 0.855 | -4.26E-03 (0.05, 0.0) | 0.001  | 0.228 | 0.974 | -8.39E-04 (0.05, 0.05) |
| 19230_12 | GSTT1    | P70711  | 211  | 0.005  | 0.012 | 0.861 | 0.01 (0.02, 0.03)  | 0.843 | 0.208         | -0.038        | 0.024 | 0.126 | -0.04 (0.08, 0.01)      | 0.003 | 0.043 | -0.005 | 0.020 | 0.799 | -0.01 (0.04, 0.01)    | -0.010 | 0.024 | 0.896 | -0.01 (0.06, 0.04)     |
| 1335_14  | PICK1    | Q75634  | 211  | 0.005  | 0.012 | 0.861 | 0.01 (0.02, 0.03)  | 0.843 | 0.208         | -0.038        | 0.024 | 0.126 | -0.04 (0.08, 0.01)      | 0.003 | 0.043 | -0.005 | 0.020 | 0.799 | -0.01 (0.04, 0.01)    | -0.010 | 0.024 | 0.896 | -0.01 (0.06, 0.04)     |
| 3873_51  | TPO      | P70720  | 211  | 0.005  | 0.012 | 0.861 | 0.01 (0.02, 0.03)  | 0.843 | 0.155         | -0.060        | 0.024 | 0.118 | -0.04 (0.08, 0.01)      | 0.003 | 0.042 | -0.002 | 0.019 | 0.897 | -2.47E-03 (0.04, 0.0) | -0.025 | 0.023 | 0.286 | -0.02 (0.07, 0.02)     |
| 3905_52  | UBE2N    | P10188  | 211  | 0.006  | 0.013 | 0.861 | 0.01 (0.03, 0.02)  | 0.843 | 0.028         | -0.037        | 0.026 | 0.149 | -0.04 (0.09, 0.01)      | 0.002 | 0.157 | -0.038 | 0.022 | 0.102 | -0.04 (0.08, 0.01)    | -0.033 | 0.027 | 0.221 | -0.03 (0.08, 0.02)     |
| 6306_20  | CK2      |         | 211  | 0.005  | 0.012 | 0.862 | 0.01 (0.02, 0.03)  | 0.843 | 0.008         | -0.074        | 0.026 | 0.149 | -0.04 (0.09, 0.01)      | 0.002 | 0.157 | -0.038 | 0.022 | 0.102 | -0.04 (0.08, 0.01)    | -0.033 | 0.027 | 0.221 | -0.03 (0.08, 0.02)     |
| 12480_9  | UTDUS    | Q89674  | 211  | 0.006  | 0.013 | 0.862 | 0.01 (0.02, 0.03)  | 0.843 | 0.008         | -0.074        | 0.026 | 0.149 | -0.04 (0.09, 0.01)      | 0.002 | 0.157 | -0.038 | 0.022 | 0.102 | -0.04 (0.08, 0.01)    | -0.033 | 0.027 | 0.221 | -0.03 (0.08, 0.02)     |
| 5289_23  | CNTN4    | Q89462  | 211  | 0.005  | 0.012 | 0.862 | 0.01 (0.02, 0.03)  | 0.843 | 0.208         | -0.045        | 0.026 | 0.051 | -0.05 (0.10, 0.01)      | 0.003 | 0.078 | -0.018 | 0.026 | 0.855 | 0.02 (0.03, 0.07)     | 0.012  | 0.023 | 0.91  | 0.01 (0.04, 0.04)      |
| 19286_35 | GBP1     | Q13283  | 211  | 0.005  | 0.012 | 0.862 | 0.01 (0.02, 0.03)  | 0.843 | 0.053         | -0.058        | 0.025 | 0.122 | -0.06 (0.11, 0.01)      | 0.003 | 0.016 | -0.037 | 0.020 | 0.984 | -0.04 (0.08, 0.21E-4) | -0.071 | 0.025 | 0.005 | -0.07 (0.12, 0.02)     |
| 9386_42  | TC9B     | Q89822  | 211  | 0.005  | 0.012 | 0.862 | 0.01 (0.02, 0.03)  | 0.843 | 0.421         | -0.035        | 0.024 | 0.134 | -0.04 (0.08, 0.01)      | 0.002 | 0.139 | -0.022 | 0.021 | 0.284 | -0.02 (0.06, 0.02)    | -0.018 | 0.023 | 0.434 | -0.02 (0.06, 0.03)     |
| 2933_20  | HLA      | Q29678  | 211  | 0.005  | 0.012 | 0.862 | 0.01 (0.02, 0.03)  | 0.843 | 0.730         | -0.033        | 0.025 | 0.139 | -0.04 (0.08, 0.01)      | 0.002 | 0.139 | -0.022 | 0.021 | 0.284 | -0.02 (0.06, 0.02)    | -0.018 | 0.023 | 0.434 | -0.02 (0.06, 0.03)     |
| 11142_11 | ANGPT1L  | ENR541  | 211  | 0.006  | 0.014 | 0.864 | 0.01 (0.03, 0.02)  | 0.843 | 0.004         | -0.007        | 0.027 | 0.174 | -0.01 (0.05, 0.0)       | 0.001 | 0.578 | -0.027 | 0.023 | 0.124 | -0.03 (0.07, 0.02)    | -0.018 | 0.026 | 0.484 | -0.02 (0.07, 0.03)     |
| 13047_15 | RSGP1    | Q89474  | 211  | 0.005  | 0.012 | 0.864 | 0.01 (0.02, 0.03)  | 0.843 | 0.112         | -0.048        | 0.024 | 0.151 | -0.05 (0.10, 0.01)      | 0.003 | 0.013 | -0.028 | 0.019 | 0.243 | -0.03 (0.07, 0.02)    | -0.018 | 0.026 | 0.484 | -0.02 (0.07, 0.03)     |
| 13548_53 | PPAP2C   | Q11072  | 211  | 0.005  | 0.013 | 0.864 | 0.01 (0.02, 0.03)  | 0.843 | 0.003         | -0.072        | 0.025 | 0.159 | -0.02 (0.06, 0.02)      | 0.001 | 0.485 | -0.026 | 0.020 | 0.202 | -0.02 (0.06, 0.02)    | -0.029 | 0.024 | 0.221 | -0.03 (0.08, 0.02)     |
| 17154_2  | PTGES3   | ENR125  | 211  | 0.006  | 0.014 | 0.864 | 0.01 (0.02, 0.03)  | 0.843 | 0.001         | -0.059        | 0.027 | 0.209 | -0.08 (0.11, 0.01)      | 0.004 | 0.006 | -0.017 | 0.022 | 0.428 | -0.02 (0.06, 0.03)    | -0.008 | 0.024 | 0.798 | -0.01 (0.05, 0.04)     |
| 9620_87  | L22R41   | Q89997  | 211  | 0.005  | 0.012 | 0.864 | 0.01 (0.02, 0.03)  | 0.843 | 0.144         | -0.074        | 0.024 | 0.033 | -0.07 (0.12, 0.03)      | 0.004 | 0.001 | -0.021 | 0.021 | 0.202 | -0.02 (0.06, 0.02)    | -0.031 | 0.024 | 0.205 | -0.03 (0.08, 0.02)     |
| 5455_23  | HSEB1    | Q15043  | 211  | 0.006  | 0.014 | 0.864 | 0.01 (0.02, 0.03)  | 0.843 | 3.69E-05      | 0.003         | 0.029 | 0.928 | -2.98E-03 (0.06, 0.05)  | 0.001 | 0.722 | -0.019 | 0.020 | 0.345 | -0.02 (0.06, 0.02)    | -0.014 | 0.025 | 0.586 | -0.01 (0.06, 0.04)     |
| 9625_56  | SCARF2   | Q89626  | 211  | 0.005  | 0.012 | 0.865 | 0.01 (0.02, 0.03)  | 0.843 | 0.665         | -0.037        | 0.023 | 0.110 | -0.04 (0.08, 0.01)      | 0.003 | 0.036 | -0.009 | 0.019 | 0.625 | -0.01 (0.05, 0.03)    | -0.026 | 0.024 | 0.291 | -0.03 (0.07, 0.02)     |
| 12584_5  | GCA      | Q29678  | 211  | 0.005  | 0.012 | 0.865 | 0.01 (0.02, 0.03)  | 0.844 | 0.020         | -0.020        | 0.026 | 0.440 | -0.07 (0.07, 0.03)      | 0.002 | 0.259 | -0.028 | 0.024 | 0.265 | -0.03 (0.07, 0.02)    | -0.032 | 0.024 | 0.188 | -0.03 (0.08, 0.02)     |
| 18610_3  | GDH      | P13150  | 211  | 0.005  | 0.012 | 0.865 | 0.01 (0.02, 0.03)  | 0.844 | 0.020         | -0.020        | 0.026 | 0.440 | -0.07 (0.07, 0.03)      | 0.002 | 0.259 | -0.028 | 0.024 | 0.265 | -0.03 (0.07, 0.02)    | -0.032 | 0.024 | 0.188 | -0.03 (0.08, 0.02)     |
| 3848_14  | GAD65    | P14448  | 211  | 0.005  | 0.012 | 0.865 | 0.01 (0.02, 0.03)  | 0.844 | 0.051         | -0.034        | 0.026 | 0.170 | -0.03 (0.08, 0.02)      | 0.002 | 0.199 | -0.033 | 0.024 | 0.163 | -0.03 (0.08, 0.02)    | -0.025 | 0.025 | 0.315 | -0.02 (0.07, 0.02)     |
| 9007_20  | CAM4     | Q89826  | 211  | 0.005  | 0.012 | 0.865 | 0.01 (0.02, 0.03)  | 0.844 | 0.697         | -0.017        | 0.024 | 0.196 | -0.02 (0.06, 0.02)      | 0.001 | 0.485 | -0.026 | 0.020 | 0.202 | -0.02 (0.06, 0.02)    | -0.029 | 0.024 | 0.221 | -0.03 (0.08, 0.02)     |
| 8033_57  | LGH3     | Q8H145  | 211  | 0.005  | 0.012 | 0.865 | 0.01 (0.02, 0.03)  | 0.844 | 0.217         | -0.024        | 0.024 | 0.176 | -0.02 (0.07, 0.03)      | 0.002 | 0.205 | -0.017 | 0.021 | 0.420 | -0.02 (0.06, 0.02)    | -0.018 | 0.024 | 0.558 | -0.02 (0.06, 0.03)     |
| 19135_5  | INTSCL   | Q89826  | 211  | 0.005  | 0.012 | 0.864 | 0.01 (0.02, 0.03)  | 0.843 | 0.003         | -0.072        | 0.025 | 0.159 | -0.02 (0.06, 0.02)      | 0.001 | 0.485 | -0.026 | 0.020 | 0.202 | -0.02 (0.06, 0.02)    | -0.029 | 0.024 | 0.221 | -0.03 (0.08, 0.02)     |
| 4429_51  | CHST2    | Q8G2X3  | 211  | 0.005  | 0.012 | 0.867 | 0.01 (0.02, 0.03)  | 0.845 | 0.387         | -0.048        | 0.023 | 0.037 | -0.05 (0.09, 0.032E-02) | 0.003 | 0.008 | -0.019 | 0.023 | 0.501 | -0.02 (0.06, 0.03)    | -0.008 | 0.024 | 0.727 | -0.01 (0.05, 0.04)     |
| 8060_2   | HP       | P12723  | 211  | 0.005  | 0.012 | 0.867 | 0.01 (0.02, 0.03)  | 0.845 | 0.064         | -0.009        | 0.027 | 0.147 | -0.01 (0.04, 0.0)       | 0.001 | 0.544 | -0.016 | 0.025 | 0.414 | -0.02 (0.06, 0.03)    | -0.018 | 0.025 | 0.481 | -0.02 (0.07, 0.03)     |
| 10546_2  | TSPYL    | Q89496  | 211  | 0.005  | 0.012 | 0.868 | 0.01 (0.02, 0.03)  | 0.846 | 0.024         | -0.024        | 0.024 | 0.463 | -0.11 (0.11, 0.01)      | 0.002 | 0.107 | -0.024 | 0.024 | 0.356 | -0.02 (0.06, 0.02)    | -0.018 | 0.025 | 0.481 | -0.02 (0.07, 0.03)     |
| 9874_172 | CALSI    | P39059  | 211  | 0.006  | 0.015 | 0.869 | 0.01 (0.04, 0.02)  | 0.847 | 3.81E-05      | 0.029         | 0.029 | 0.324 | -0.03 (0.09, 0.03)      | 0.001 | 0.372 | -0.024 | 0.026 | 0.370 | -0.02 (0.06, 0.03)    | -0.031 | 0.026 | 0.234 | -0.03 (0.08, 0.02)     |
| 12534_10 | CALCOCCO | Q13137  | 211  | 0.006  | 0.015 | 0.869 | 0.01 (0.02, 0.03)  | 0.847 | 0.034         | -0.061        | 0.025 | 0.107 | -0.06 (0.11, 0.01)      | 0.004 | 0.003 | -0.014 | 0.022 | 0.533 | -0.03 (0.07, 0.02)    | -0.015 | 0.028 | 0.554 | -0.02 (0.07, 0.04)     |
| 10613_1  | L18R49   |         | 211  | 0.005  | 0.012 | 0.869 | 0.01 (0.02, 0.03)  | 0.847 | 0.003         | -0.022        | 0.024 | 0.163 | -0.02 (0.06, 0.02)      | 0.001 | 0.403 | -0.017 | 0.023 | 0.610 | -0.02 (0.06, 0.02)    | -0.024 | 0.027 | 0.610 | -0.02 (0.07, 0.03)     |
| 3325_2   | MAT2     | Q00339  | 211  | 0.006  | 0.014 | 0.870 | 0.01 (0.03, 0.02)  | 0.847 | 0.002         | -0.009        | 0.028 | 0.176 | -0.01 (0.05, 0.0)       | 0.001 | 0.544 | -0.016 | 0.022 | 0.476 | -0.02 (0.06, 0.03)    | -0.021 | 0.025 | 0.395 | -0.02 (0.07, 0.03)     |
| 19189_2  | USP14    | Q15543  | 211  | 0.005  | 0.012 | 0.870 | 0.01 (0.02, 0.03)  | 0.847 | 0.003         | -0.022        | 0.024 | 0.155 | -0.02 (0.06, 0.02)      | 0.001 | 0.403 | -0.017 | 0.023 | 0.610 | -0.02 (0.06, 0.02)    | -0.024 | 0.027 | 0.610 | -0.02                  |





Table S3. Association of type 2 diabetes with deCODE plasma protein

| SNP       | Gene     | Uniprot | nsp | bw    | sw    | prval | clval                 | FDR   | Q        | val   | beuger | segger | prval                   | clval | egger | Integger | prval | median | prval               | clval             | bmode  | prval | clval               |                   |
|-----------|----------|---------|-----|-------|-------|-------|-----------------------|-------|----------|-------|--------|--------|-------------------------|-------|-------|----------|-------|--------|---------------------|-------------------|--------|-------|---------------------|-------------------|
| 9402.18   | DCED11   | ENR28   | 21  | 0.003 | 0.012 | 0.779 | 3.26e-03 (0.02, 0.03) | 0.009 | 0.166    | 0.051 | 0.024  | 0.034  | 0.05e-04 (0.001, 0.01)  | 0.003 | 0.009 | 0.009    | 0.028 | 0.020  | 0.166               | 0.03 (0.07, 0.01) | -0.024 | 0.024 | 0.331               | 0.02 (0.07, 0.02) |
| 9404.144  | EPOH1    | ENR22   | 21  | 0.003 | 0.012 | 0.779 | 3.26e-03 (0.02, 0.03) | 0.009 | 0.203    | 0.048 | 0.024  | 0.034  | 0.05e-04 (0.001, 0.01)  | 0.003 | 0.009 | 0.009    | 0.028 | 0.020  | 0.166               | 0.03 (0.07, 0.01) | -0.024 | 0.024 | 0.331               | 0.02 (0.07, 0.02) |
| 17455.42  | FOLR1    | P15328  | 21  | 0.004 | 0.013 | 0.781 | 3.62e-03 (0.02, 0.03) | 0.007 | 0.034    | 0.041 | 0.026  | 0.058  | 0.01 (0.06, 0.04)       | 0.001 | 0.428 | 0.015    | 0.025 | 0.599  | 0.01 (0.04, 0.06)   | 0.013             | 0.025  | 0.605 | 0.01 (0.04, 0.06)   |                   |
| 9959.80   | TMEM93   | OR0428  | 21  | 0.003 | 0.012 | 0.781 | 3.62e-03 (0.02, 0.03) | 0.007 | 0.067    | 0.046 | 0.026  | 0.088  | 0.07 (0.11, -0.02)      | 0.004 | 0.003 | 0.036    | 0.021 | 0.084  | 0.04 (0.06, 0.047e) | -0.037            | 0.023  | 0.110 | -0.04 (0.08, 0.01)  |                   |
| 12071.35  | SULT1B1  | Q1301   | 21  | 0.003 | 0.012 | 0.781 | 3.62e-03 (0.02, 0.03) | 0.007 | 0.034    | 0.041 | 0.026  | 0.058  | 0.01 (0.06, 0.04)       | 0.001 | 0.428 | 0.015    | 0.025 | 0.599  | 0.01 (0.04, 0.06)   | 0.013             | 0.025  | 0.605 | 0.01 (0.04, 0.06)   |                   |
| 14013.11  | TANK     | Q92844  | 21  | 0.003 | 0.012 | 0.783 | 3.48e-03 (0.02, 0.02) | 0.008 | 0.044    | 0.037 | 0.025  | 0.135  | 0.04 (0.09, 0.01)       | 0.002 | 0.117 | 0.032    | 0.023 | 0.164  | 0.03 (0.08, 0.01)   | -0.038            | 0.024  | 0.119 | -0.04 (0.08, 0.01)  |                   |
| 12599.28  | SCD5     | P58819  | 21  | 0.003 | 0.012 | 0.783 | 3.48e-03 (0.02, 0.02) | 0.008 | 0.044    | 0.037 | 0.025  | 0.135  | 0.04 (0.09, 0.01)       | 0.002 | 0.117 | 0.032    | 0.023 | 0.164  | 0.03 (0.08, 0.01)   | -0.038            | 0.024  | 0.119 | -0.04 (0.08, 0.01)  |                   |
| 26455.34  | PKRIZ2   | Q51153  | 21  | 0.003 | 0.012 | 0.782 | 3.22e-03 (0.02, 0.02) | 0.008 | 0.415    | 0.053 | 0.023  | 0.023  | 0.02e-05 (0.00, 0.01)   | 0.003 | 0.013 | 0.037    | 0.022 | 0.102  | 0.04 (0.08, 0.01)   | -0.044            | 0.025  | 0.079 | -0.04 (0.08, 0.01)  |                   |
| 16099.99  | ND2      | Q14112  | 21  | 0.004 | 0.013 | 0.784 | 3.68e-03 (0.02, 0.03) | 0.008 | 0.003    | 0.040 | 0.026  | 0.129  | 0.04 (0.09, 0.01)       | 0.003 | 0.005 | 0.031    | 0.021 | 0.137  | 0.03 (0.07, 0.01)   | -0.045            | 0.026  | 0.079 | -0.05 (0.10, 0.02)  |                   |
| 17327.3   | CNPY3    | Q91819  | 21  | 0.003 | 0.012 | 0.781 | 3.26e-03 (0.02, 0.03) | 0.009 | 0.115    | 0.016 | 0.022  | 0.098  | 0.04 (0.09, 0.01)       | 0.003 | 0.011 | 0.036    | 0.024 | 0.162  | 0.01 (0.04, 0.06)   | -0.045            | 0.026  | 0.079 | -0.05 (0.10, 0.02)  |                   |
| 18877.15  | CND2     | Q99439  | 21  | 0.003 | 0.012 | 0.785 | 3.22e-03 (0.02, 0.02) | 0.009 | 0.328    | 0.028 | 0.024  | 0.129  | 0.03 (0.07, 0.02)       | 0.002 | 0.223 | 0.033    | 0.022 | 0.137  | 0.03 (0.08, 0.01)   | -0.032            | 0.025  | 0.194 | -0.03 (0.08, 0.01)  |                   |
| 4301.58   | TK1      | Q14183  | 21  | 0.003 | 0.012 | 0.785 | 3.22e-03 (0.02, 0.02) | 0.009 | 0.105    | 0.061 | 0.025  | 0.104  | 0.06 (0.11, -0.01)      | 0.004 | 0.007 | 0.026    | 0.024 | 0.269  | 0.03 (0.07, 0.02)   | -0.012            | 0.023  | 0.623 | 0.01 (0.08, 0.01)   |                   |
| 9654.29   | PITPNB   | Q91819  | 21  | 0.003 | 0.012 | 0.781 | 3.26e-03 (0.02, 0.03) | 0.009 | 0.062    | 0.027 | 0.022  | 0.098  | 0.04 (0.09, 0.01)       | 0.003 | 0.007 | 0.026    | 0.024 | 0.269  | 0.03 (0.07, 0.02)   | -0.012            | 0.023  | 0.623 | 0.01 (0.08, 0.01)   |                   |
| 10390.21  | ZNF373   | OR5L27  | 21  | 0.003 | 0.012 | 0.788 | 3.21e-03 (0.02, 0.03) | 0.009 | 0.246    | 0.048 | 0.024  | 0.048  | 0.05 (0.10, -0.01)      | 0.003 | 0.015 | 0.014    | 0.020 | 0.473  | 0.01 (0.05, 0.02)   | -0.029            | 0.022  | 0.201 | -0.03 (0.07, 0.01)  |                   |
| 12590.7   | PSMB8    | P28014  | 21  | 0.003 | 0.012 | 0.786 | 3.44e-03 (0.02, 0.02) | 0.009 | 0.045    | 0.025 | 0.025  | 0.051  | 0.05 (0.10, 0.02)       | 0.003 | 0.023 | 0.021    | 0.024 | 0.385  | 0.03 (0.07, 0.02)   | -0.010            | 0.024  | 0.088 | -0.01 (0.06, 0.04)  |                   |
| 12808.103 | CARHSP1  | Q9Y2V2  | 21  | 0.003 | 0.012 | 0.789 | 3.17e-03 (0.02, 0.03) | 0.009 | 0.129    | 0.028 | 0.025  | 0.280  | 0.03 (0.08, 0.02)       | 0.002 | 0.147 | 0.020    | 0.020 | 0.228  | 0.02 (0.06, 0.01)   | -0.030            | 0.024  | 0.202 | -0.03 (0.08, 0.01)  |                   |
| 12826.5   | SLC6A5   | Q92911  | 21  | 0.003 | 0.012 | 0.789 | 3.49e-03 (0.02, 0.03) | 0.009 | 0.008    | 0.027 | 0.026  | 0.289  | 0.03 (0.08, 0.02)       | 0.002 | 0.187 | 0.022    | 0.023 | 0.342  | 0.02 (0.06, 0.01)   | -0.035            | 0.024  | 0.142 | -0.04 (0.08, 0.01)  |                   |
| 13111.78  | BCIL1    | P41482  | 21  | 0.003 | 0.012 | 0.789 | 3.16e-03 (0.02, 0.03) | 0.009 | 0.120    | 0.045 | 0.024  | 0.051  | 0.05 (0.10, 0.02)       | 0.003 | 0.024 | 0.020    | 0.024 | 0.302  | 0.02 (0.06, 0.01)   | -0.025            | 0.024  | 0.244 | -0.03 (0.08, 0.01)  |                   |
| 13958.5   | RBMA6    | Q187V0  | 21  | 0.003 | 0.012 | 0.790 | 3.08e-03 (0.02, 0.03) | 0.009 | 0.369    | 0.037 | 0.023  | 0.112  | 0.04 (0.09, 0.01)       | 0.003 | 0.046 | 0.032    | 0.024 | 0.143  | 0.03 (0.08, 0.01)   | -0.042            | 0.023  | 0.071 | -0.04 (0.08, 0.01)  |                   |
| 14098.28  | CFM4     | P49889  | 21  | 0.003 | 0.012 | 0.790 | 3.45e-03 (0.02, 0.03) | 0.009 | 0.049    | 0.040 | 0.025  | 0.112  | 0.04 (0.09, 0.01)       | 0.003 | 0.046 | 0.032    | 0.024 | 0.143  | 0.03 (0.08, 0.01)   | -0.042            | 0.023  | 0.071 | -0.04 (0.08, 0.01)  |                   |
| 17453.34  | CFP      | P26689  | 21  | 0.003 | 0.012 | 0.789 | 3.78e-03 (0.02, 0.03) | 0.009 | 1.87E-04 | 0.049 | 0.027  | 0.081  | 0.03 (0.07, 0.02)       | 0.003 | 0.027 | 0.013    | 0.023 | 0.151  | 0.01 (0.05, 0.02)   | -0.013            | 0.024  | 0.887 | 0.01 (0.06, 0.04)   |                   |
| 18181.2   | TSSC4    | Q9Y5U2  | 21  | 0.003 | 0.012 | 0.789 | 3.18e-03 (0.02, 0.03) | 0.009 | 0.089    | 0.046 | 0.025  | 0.083  | 0.05 (0.10, 0.02, 0.03) | 0.003 | 0.022 | 0.021    | 0.019 | 0.263  | 0.02 (0.06, 0.02)   | -0.040            | 0.023  | 0.084 | -0.04 (0.08, 0.01)  |                   |
| 18302.204 | ZWILCH   | Q9H900  | 21  | 0.004 | 0.014 | 0.789 | 3.69e-03 (0.02, 0.03) | 0.009 | 0.001    | 0.073 | 0.027  | 0.007  | 0.07 (0.13, -0.02)      | 0.005 | 0.001 | 0.013    | 0.023 | 0.561  | 0.01 (0.06, 0.04)   | -0.009            | 0.024  | 0.988 | 0.01 (0.06, 0.04)   |                   |
| 18330.7   | PSS2     | Q96033  | 21  | 0.003 | 0.012 | 0.787 | 3.17e-03 (0.02, 0.03) | 0.009 | 0.314    | 0.110 | 0.024  | 0.093  | 0.01 (0.06, 0.04)       | 0.001 | 0.541 | 0.006    | 0.023 | 0.809  | 0.01 (0.05, 0.04)   | -0.001            | 0.024  | 0.954 | -1.14 (0.05, 0.05)  |                   |
| 2734.49   | NCR2     | Q95844  | 21  | 0.003 | 0.012 | 0.788 | 3.12e-03 (0.02, 0.03) | 0.009 | 0.313    | 0.050 | 0.023  | 0.034  | 0.05 (0.10, -0.01)      | 0.003 | 0.009 | 0.015    | 0.021 | 0.467  | 0.02 (0.06, 0.02)   | -0.024            | 0.021  | 0.255 | -0.02 (0.07, 0.02)  |                   |
| 9865.65   | FRS3     | P12034  | 21  | 0.003 | 0.012 | 0.788 | 3.13e-03 (0.02, 0.03) | 0.009 | 0.322    | 0.038 | 0.023  | 0.103  | 0.04 (0.09, 0.01)       | 0.003 | 0.041 | 0.028    | 0.022 | 0.210  | 0.03 (0.07, 0.02)   | -0.028            | 0.025  | 0.266 | -0.03 (0.08, 0.02)  |                   |
| 3179.5    | CTSC     | P53634  | 21  | 0.003 | 0.012 | 0.786 | 3.22e-03 (0.02, 0.03) | 0.009 | 0.241    | 0.053 | 0.024  | 0.028  | 0.05 (0.10, -0.01)      | 0.004 | 0.007 | 0.010    | 0.021 | 0.625  | 0.01 (0.05, 0.03)   | -0.010            | 0.023  | 0.652 | 0.01 (0.05, 0.03)   |                   |
| 4430.1    | ENTPD5   | Q17585  | 21  | 0.003 | 0.012 | 0.790 | 3.18e-03 (0.02, 0.03) | 0.009 | 0.092    | 0.029 | 0.025  | 0.008  | 0.07 (0.12, -0.02)      | 0.004 | 0.002 | 0.018    | 0.021 | 0.411  | 0.03 (0.07, 0.02)   | -0.016            | 0.025  | 0.532 | -0.02 (0.07, 0.02)  |                   |
| 5200.80   | TYK2     | Q91819  | 21  | 0.003 | 0.012 | 0.789 | 3.26e-03 (0.02, 0.03) | 0.009 | 0.226    | 0.048 | 0.024  | 0.098  | 0.04 (0.09, 0.01)       | 0.003 | 0.017 | 0.036    | 0.024 | 0.175  | 0.04 (0.08, 0.01)   | -0.052            | 0.020  | 0.295 | 0.01 (0.06, 0.04)   |                   |
| 5634.39   | POU1F1   | Q9H889  | 21  | 0.004 | 0.014 | 0.789 | 3.84e-03 (0.02, 0.03) | 0.009 | 3.41E+05 | 0.056 | 0.028  | 0.047  | 0.06 (0.11, -1.86e-04)  | 0.004 | 0.014 | 0.028    | 0.020 | 0.163  | 0.03 (0.07, 0.01)   | -0.058            | 0.025  | 0.023 | -0.06 (0.11, -0.01) |                   |
| 5910.40   | JPH1     | Q91819  | 21  | 0.003 | 0.012 | 0.789 | 3.26e-03 (0.02, 0.03) | 0.009 | 0.062    | 0.027 | 0.022  | 0.117  | 0.03 (0.07, 0.02)       | 0.003 | 0.004 | 0.014    | 0.020 | 0.844  | 0.01 (0.05, 0.01)   | -0.004            | 0.021  | 0.854 | 0.01 (0.05, 0.01)   |                   |
| 6998.106  | ASPH     | Q17587  | 21  | 0.003 | 0.012 | 0.789 | 3.15e-03 (0.02, 0.03) | 0.009 | 0.326    | 0.039 | 0.024  | 0.102  | 0.04 (0.09, 0.01)       | 0.003 | 0.041 | 0.042    | 0.021 | 0.047  | 0.04 (0.08, 0.02)   | -0.038            | 0.025  | 0.155 | -0.04 (0.08, 0.01)  |                   |
| 8635.283  | ZPNR     | Q12956  | 21  | 0.003 | 0.012 | 0.789 | 3.54e-03 (0.02, 0.03) | 0.009 | 0.105    | 0.039 | 0.024  | 0.091  | 0.07 (0.12, -0.02)      | 0.003 | 0.001 | 0.020    | 0.020 | 0.331  | 0.02 (0.06, 0.02)   | -0.027            | 0.024  | 0.272 | -0.03 (0.07, 0.02)  |                   |
| 9004.12   | CACNA2D3 | Q91819  | 21  | 0.003 | 0.012 | 0.789 | 3.26e-03 (0.02, 0.03) | 0.009 | 0.233    | 0.043 | 0.024  | 0.102  | 0.04 (0.09, 0.01)       | 0.003 | 0.001 | 0.013    | 0.021 | 0.388  | 0.02 (0.06, 0.02)   | -0.021            | 0.023  | 0.484 | 0.01 (0.06, 0.04)   |                   |
| 9004.12   | RNF215   | Q9Y157  | 21  | 0.003 | 0.012 | 0.790 | 3.16e-03 (0.02, 0.03) | 0.009 | 0.026    | 0.065 | 0.025  | 0.101  | 0.06 (0.11, -0.02)      | 0.004 | 0.005 | 0.009    | 0.021 | 0.647  | 0.01 (0.05, 0.03)   | -0.036            | 0.027  | 0.186 | -0.04 (0.08, 0.02)  |                   |
| 9200.30   | RMN3     | Q9H727  | 21  | 0.003 | 0.012 | 0.789 | 3.18e-03 (0.02, 0.03) | 0.009 | 0.227    | 0.052 | 0.024  | 0.032  | 0.05 (0.10, -0.01)      | 0.003 | 0.020 | 0.024    | 0.020 | 0.243  | 0.02 (0.06, 0.02)   | -0.024            | 0.024  | 0.138 | -0.02 (0.07, 0.02)  |                   |
| 9200.30   | RNF215   | Q9Y157  | 21  | 0.003 | 0.012 | 0.790 | 3.16e-03 (0.02, 0.03) | 0.009 | 0.026    | 0.065 | 0.025  | 0.101  | 0.06 (0.11, -0.02)      | 0.004 | 0.005 | 0.009    | 0.021 | 0.647  | 0.01 (0.05, 0.03)   | -0.036            | 0.027  | 0.186 | -0.04 (0.08, 0.02)  |                   |
| 9534.39   | POU1F1   | Q9H889  | 21  | 0.004 | 0.014 | 0.789 | 3.84e-03 (0.02, 0.03) | 0.009 | 3.41E+05 | 0.056 | 0.028  | 0.047  | 0.06 (0.11, -1.86e-04)  | 0.004 | 0.014 | 0.028    | 0.020 | 0.163  | 0.03 (0.07, 0.01)   | -0.058            | 0.025  | 0.023 | -0.06 (0.11, -0.01) |                   |
| 9540.10   | JPH1     | Q91819  | 21  | 0.003 | 0.012 | 0.789 | 3.26e-03 (0.02, 0.03) | 0.009 | 0.062    | 0.027 | 0.     |        |                         |       |       |          |       |        |                     |                   |        |       |                     |                   |

Table S3. Association of type 2 diabetes with deCODE plasma protein

| Gene      | Chr         | Gene/Protein | nsnp | bw    | se   | beta  | prval    | CI_low       | CI_high | FDR_low  | FDR_high | q_val | beqger    | segger | prvalgger | CI_lowgger       | CI_highgger  | egger  | Interegger | prvalInteregger | seMedian | prvalMedian | CI_lowMedian     | CI_highMedian | b_mode | seMed | prvalMed | CI_lowMed    | CI_highMed       |
|-----------|-------------|--------------|------|-------|------|-------|----------|--------------|---------|----------|----------|-------|-----------|--------|-----------|------------------|--------------|--------|------------|-----------------|----------|-------------|------------------|---------------|--------|-------|----------|--------------|------------------|
| 19654.61  | RFA         | INT5308      | 211  | 0.002 | 0.12 | 0.839 | 2.34e-03 | (0.62, 0.02) | 0.932   | 0.765    | 0.029    | 0.023 | 0.209     | 0.03   | 0.027     | 0.007            | (0.02, 0.02) | 0.002  | 0.116      | 0.023           | 0.202    | 0.256       | 0.02             | (0.02, 0.02)  | -0.032 | 0.205 | 0.196    | 0.03         | (0.08, 0.02)     |
| 17416.7   | CABLES1     | OR9K07       | 211  | 0.002 | 0.12 | 0.839 | 2.34e-03 | (0.62, 0.02) | 0.932   | 0.765    | 0.029    | 0.023 | 0.209     | 0.03   | 0.027     | 0.007            | (0.02, 0.02) | 0.002  | 0.116      | 0.023           | 0.202    | 0.256       | 0.02             | (0.02, 0.02)  | -0.032 | 0.205 | 0.196    | 0.03         | (0.08, 0.02)     |
| 11312.179 | FSTL1       | IC12841      | 211  | 0.003 | 0.14 | 0.840 | 2.90e-03 | (0.63, 0.03) | 0.933   | 7.63E-05 | 0.012    | 0.029 | 0.867     | 0.01   | 0.027     | 0.001            | (0.04, 0.07) | -0.001 | 0.703      | 0.015           | 0.025    | 0.568       | 0.01             | (0.06, 0.04)  | 0.008  | 0.027 | 0.781    | 0.01         | (0.05, 0.06)     |
| 10620.21  | MSMB        | 11818        | 211  | 0.002 | 0.12 | 0.841 | 2.45e-03 | (0.63, 0.02) | 0.933   | 0.002    | 0.116    | 0.025 | 0.827     | 0.02   | 0.027     | 0.002            | (0.04, 0.07) | 0.001  | 0.405      | 0.019           | 0.025    | 0.312       | 0.02             | (0.02, 0.02)  | 0.032  | 0.204 | 0.180    | 0.03         | (0.01, 0.08)     |
| 11314.20  | SLC2        | OR9K04       | 211  | 0.002 | 0.12 | 0.842 | 2.65e-03 | (0.63, 0.02) | 0.933   | 0.002    | 0.116    | 0.025 | 0.827     | 0.02   | 0.027     | 0.002            | (0.04, 0.07) | 0.001  | 0.405      | 0.019           | 0.025    | 0.312       | 0.02             | (0.02, 0.02)  | 0.032  | 0.204 | 0.180    | 0.03         | (0.01, 0.08)     |
| 4137.57   | LCS         | ORH293       | 211  | 0.003 | 0.13 | 0.841 | 2.56e-03 | (0.63, 0.02) | 0.933   | 0.045    | 0.056    | 0.025 | 0.027     | 0.06   | 0.01      | (0.10, 0.21)     | 0.003        | 0.014  | 0.025      | 0.020           | 0.203    | 0.02        | (0.06, 0.01)     | -0.032        | 0.022  | 0.158 | 0.03     | (0.08, 0.01) |                  |
| 11309.24  | PYHFR       | IC14145      | 211  | 0.002 | 0.12 | 0.844 | 2.35e-03 | (0.63, 0.02) | 0.933   | 0.001    | 0.119    | 0.028 | 0.814     | 0.03   | 0.027     | 0.001            | (0.04, 0.07) | 0.002  | 0.178      | 0.030           | 0.022    | 0.344       | 0.03             | (0.03, 0.01)  | 0.004  | 0.021 | 0.844    | 0.01         | (0.03, 0.01)     |
| 13068.139 | CES         | IC14518      | 211  | 0.002 | 0.12 | 0.841 | 2.37e-03 | (0.63, 0.02) | 0.933   | 0.058    | 0.063    | 0.025 | 0.011     | 0.06   | 0.01      | (0.11, 0.21)     | 0.004        | 0.002  | 0.021      | 0.022           | 0.335    | 0.02        | (0.02, 0.02)     | -0.007        | 0.024  | 0.761 | 0.01     | (0.05, 0.04) |                  |
| 3132.1    | VEGFC       | P49767       | 211  | 0.002 | 0.12 | 0.841 | 2.39e-03 | (0.63, 0.02) | 0.933   | 0.064    | 0.041    | 0.025 | 0.140     | 0.04   | 0.025     | 0.102            | (0.04, 0.09) | 0.001  | 0.074      | 0.035           | 0.020    | 0.388       | 0.03             | (0.07, 0.01)  | -0.041 | 0.023 | 0.707    | 0.04         | (0.09, 3.19e-03) |
| 9478.56   | PRPF43      | OR9K08       | 211  | 0.002 | 0.12 | 0.842 | 2.58e-03 | (0.63, 0.02) | 0.933   | 0.086    | 0.041    | 0.025 | 0.140     | 0.04   | 0.025     | 0.102            | (0.04, 0.09) | 0.001  | 0.074      | 0.035           | 0.020    | 0.388       | 0.03             | (0.07, 0.01)  | -0.041 | 0.023 | 0.707    | 0.04         | (0.09, 3.19e-03) |
| 11198.37  | CREBBL1     | OR9K08A      | 211  | 0.002 | 0.12 | 0.842 | 2.31e-03 | (0.63, 0.02) | 0.933   | 0.433    | 0.034    | 0.025 | 0.140     | 0.04   | 0.025     | 0.102            | (0.04, 0.09) | 0.001  | 0.074      | 0.035           | 0.020    | 0.388       | 0.03             | (0.07, 0.01)  | -0.041 | 0.023 | 0.707    | 0.04         | (0.09, 3.19e-03) |
| 4152.10   | AKR1A1      | P14550       | 211  | 0.003 | 0.13 | 0.842 | 2.58e-03 | (0.63, 0.02) | 0.933   | 0.040    | -0.029   | 0.026 | 0.103     | 0.03   | 0.027     | 0.00             | (0.08, 0.02) | 0.002  | 0.165      | 0.032           | 0.021    | 0.123       | 0.03             | (0.07, 0.01)  | -0.029 | 0.025 | 0.260    | 0.03         | (0.08, 0.02)     |
| 8886.3    | CTHRE6      | OR9K09       | 211  | 0.002 | 0.12 | 0.843 | 2.30e-03 | (0.63, 0.02) | 0.933   | 8.88E-05 | 0.029    | 0.019 | 0.019     | 0.028  | 0.014     | 0.025            | 0.101        | 0.04   | 0.025      | 0.014           | 0.360    | 0.01        | (0.06, 0.04)     | 0.017         | 0.026  | 0.815 | 0.01     | (0.06, 0.04) |                  |
| 12933.87  | RPA         | P49237       | 211  | 0.002 | 0.12 | 0.843 | 2.34e-03 | (0.63, 0.02) | 0.933   | 0.117    | 0.041    | 0.025 | 0.101     | 0.04   | 0.025     | 0.101            | 0.04         | 0.025  | 0.074      | 0.033           | 0.020    | 0.121       | 0.03             | (0.07, 0.01)  | -0.034 | 0.025 | 0.717    | 0.03         | (0.08, 0.02)     |
| 12586.14  | HEAT1       | IC14145      | 211  | 0.002 | 0.12 | 0.844 | 2.55e-03 | (0.63, 0.02) | 0.933   | 0.011    | 0.028    | 0.026 | 0.08      | 0.02   | 0.03      | (0.08, 0.02)     | 0.002        | 0.08   | 0.030      | 0.022           | 0.178    | 0.03        | (0.07, 0.01)     | -0.028        | 0.028  | 0.868 | 0.01     | (0.03, 0.02) |                  |
| 13991.47  | EFGK3       | OR4332       | 211  | 0.002 | 0.12 | 0.843 | 2.31e-03 | (0.63, 0.02) | 0.933   | 0.265    | 0.033    | 0.023 | 0.893E-05 | 0.028  | 0.033     | 0.893E-05        | (0.13, 0.04) | 0.005  | 6.96E-05   | 0.027           | 0.019    | 0.157       | 0.03             | (0.08, 0.01)  | -0.035 | 0.024 | 0.144    | 0.04         | (0.08, 0.01)     |
| 14067.6   | PK42        | OR9939       | 211  | 0.003 | 0.13 | 0.843 | 2.55e-03 | (0.63, 0.02) | 0.933   | 0.030    | -0.029   | 0.025 | 0.253     | 0.03   | 0.027     | 0.00             | (0.08, 0.02) | 0.002  | 0.150      | 0.021           | 0.019    | 0.279       | 0.02             | (0.06, 0.02)  | -0.044 | 0.025 | 0.704    | 0.04         | (0.09, 4.07e-03) |
| 5731.22   | NOV         | P95673       | 211  | 0.002 | 0.12 | 0.843 | 2.35e-03 | (0.63, 0.02) | 0.933   | 0.129    | 0.025    | 0.025 | 0.087     | 0.07   | 0.012     | (0.12, 0.02)     | 0.004        | 0.003  | 0.037      | 0.030           | 0.068    | 0.04        | (0.08, 2.46e-04) | -0.055        | 0.025  | 0.008 | 0.07     | (0.11, 0.02) |                  |
| 3504.58   | HAMP        | OR1672       | 211  | 0.002 | 0.12 | 0.843 | 2.40e-03 | (0.63, 0.02) | 0.933   | 0.288    | 0.019    | 0.025 | 0.495     | 0.02   | 0.027     | 0.00             | (0.07, 0.03) | 0.001  | 0.313      | 0.018           | 0.025    | 0.467       | 0.02             | (0.07, 0.03)  | -0.031 | 0.023 | 0.183    | 0.03         | (0.08, 0.01)     |
| 3506.78   | COL22       | OR9K126      | 211  | 0.003 | 0.14 | 0.844 | 2.80e-03 | (0.63, 0.03) | 0.934   | 2.24E-04 | -0.047   | 0.028 | 0.039     | 0.05   | 0.010     | (0.10, 0.21)     | 0.003        | 0.041  | 0.029      | 0.020           | 0.144    | 0.03        | (0.07, 0.01)     | -0.042        | 0.026  | 0.113 | 0.04     | (0.09, 0.01) |                  |
| 14858.4   | PTGFS2      | OR9K177      | 211  | 0.002 | 0.12 | 0.845 | 2.34e-03 | (0.63, 0.02) | 0.935   | 0.093    | 0.025    | 0.033 | 0.025     | 0.03   | 0.025     | 0.03             | (0.09, 0.01) | 0.001  | 0.086      | 0.030           | 0.021    | 0.123       | 0.03             | (0.07, 0.01)  | -0.027 | 0.024 | 0.266    | 0.03         | (0.07, 0.02)     |
| 8946.38   | NR1H4       | OR9K11       | 211  | 0.003 | 0.13 | 0.845 | 2.57e-03 | (0.63, 0.02) | 0.934   | 0.006    | -0.060   | 0.026 | 0.020     | 0.08   | 0.01      | (0.11, 0.21)     | 0.004        | 0.005  | 0.026      | 0.022           | 0.231    | 0.03        | (0.07, 0.02)     | -0.021        | 0.023  | 0.593 | 0.01     | (0.06, 0.03) |                  |
| 13516.48  | EMC4        | OR9K12       | 211  | 0.003 | 0.14 | 0.846 | 2.80e-03 | (0.63, 0.03) | 0.935   | 0.001    | 0.019    | 0.028 | 0.14      | 0.02   | 0.04      | (0.07, 0.01)     | 0.001        | 0.385  | 0.010      | 0.026           | 0.087    | 0.01        | (0.06, 0.04)     | -0.016        | 0.027  | 0.588 | 0.02     | (0.07, 0.04) |                  |
| 16320.139 | CD320       | OR9K170      | 211  | 0.002 | 0.13 | 0.846 | 2.47e-03 | (0.63, 0.02) | 0.935   | 0.011    | -0.018   | 0.025 | 0.475     | 0.02   | 0.017     | (0.07, 0.03)     | 0.001        | 0.347  | 0.025      | 0.022           | 0.284    | 0.02        | (0.07, 0.02)     | -0.028        | 0.023  | 0.228 | 0.03     | (0.07, 0.02) |                  |
| 2182.83   | CCLL2       | OR9K43       | 211  | 0.002 | 0.12 | 0.846 | 2.29e-03 | (0.63, 0.02) | 0.935   | 0.140    | -0.032   | 0.025 | 0.199     | 0.03   | 0.027     | 0.00             | (0.08, 0.02) | 0.002  | 0.187      | 0.027           | 0.022    | 0.215       | 0.03             | (0.07, 0.02)  | -0.028 | 0.023 | 0.219    | 0.03         | (0.07, 0.02)     |
| 5831.52   | HNRNK2P2292 | OR9K12       | 211  | 0.003 | 0.14 | 0.846 | 2.63e-03 | (0.63, 0.02) | 0.935   | 0.005    | 0.071    | 0.026 | 0.007     | 0.07   | 0.012     | (0.12, 0.02)     | 0.004        | 0.003  | 0.037      | 0.030           | 0.068    | 0.04        | (0.08, 2.46e-04) | -0.055        | 0.025  | 0.008 | 0.07     | (0.11, 0.02) |                  |
| 8831.12   | GSBP2       | OR9K086      | 211  | 0.003 | 0.13 | 0.846 | 2.54e-03 | (0.63, 0.02) | 0.935   | 0.019    | -0.046   | 0.026 | 0.075     | 0.05   | 0.010     | (0.14, 0.33)     | 0.003        | 0.051  | 0.041      | 0.020           | 0.245    | 0.03        | (0.07, 0.01)     | -0.040        | 0.026  | 0.015 | 0.06     | (0.12, 0.01) |                  |
| 10893.43  | KLRG2       | OR9K150      | 211  | 0.002 | 0.13 | 0.849 | 2.45e-03 | (0.63, 0.02) | 0.935   | 0.009    | -0.024   | 0.026 | 0.340     | 0.02   | 0.027     | 0.00             | (0.07, 0.03) | 0.002  | 0.225      | 0.029           | 0.022    | 0.193       | 0.03             | (0.07, 0.01)  | -0.020 | 0.024 | 0.398    | 0.02         | (0.07, 0.03)     |
| 10772.21  | CSGALNAC1   | OR9K150      | 211  | 0.002 | 0.12 | 0.850 | 2.37e-03 | (0.63, 0.02) | 0.935   | 0.041    | 0.029    | 0.025 | 0.030     | 0.02   | 0.010     | (0.07, 0.01)     | 0.001        | 0.273  | 0.028      | 0.020           | 0.215    | 0.03        | (0.07, 0.02)     | -0.024        | 0.024  | 0.260 | 0.03     | (0.08, 0.01) |                  |
| 13175.6   | HMSD3       | OR9K150      | 211  | 0.002 | 0.12 | 0.850 | 2.38e-03 | (0.63, 0.02) | 0.935   | 0.189    | 0.050    | 0.023 | 0.030     | 0.02   | 0.010     | (0.10, 0.35e-06) | 0.003        | 0.011  | 0.019      | 0.021           | 0.361    | 0.02        | (0.06, 0.02)     | -0.014        | 0.022  | 0.506 | 0.01     | (0.06, 0.03) |                  |
| 13473.55  | ITPKA       | P23677       | 211  | 0.002 | 0.12 | 0.850 | 2.22e-03 | (0.63, 0.02) | 0.935   | 0.080    | -0.054   | 0.025 | 0.028     | 0.05   | 0.011     | (0.11, 0.21)     | 0.003        | 0.015  | 0.008      | 0.019           | 0.264    | 0.01        | (0.05, 0.03)     | -0.030        | 0.024  | 0.215 | 0.03     | (0.08, 0.02) |                  |
| 15367.38  | BPRF1       | OR9K150      | 211  | 0.003 | 0.16 | 0.848 | 2.99e-03 | (0.63, 0.03) | 0.935   | 4.31E-09 | 0.033    | 0.031 | 0.914     | 0.03   | 0.031     | 0.377e-05        | (0.06, 0.06) | 0.000  | 0.989      | 0.025           | 0.022    | 0.263       | 0.03             | (0.02, 0.02)  | -0.022 | 0.028 | 0.435    | 0.02         | (0.03, 0.08)     |
| 15415.8   | LRRK3       | OR9K150      | 211  | 0.002 | 0.13 | 0.848 | 2.63e-03 | (0.63, 0.02) | 0.935   | 0.011    | 0.022    | 0.013 | 0.109     | 0.02   | 0.013     | (0.09, 0.03)     | 0.001        | 0.089  | 0.025      | 0.022           | 0.263    | 0.03        | (0.02, 0.02)     | -0.022        | 0.028  | 0.435 | 0.02     | (0.03, 0.08) |                  |
| 19132.1   | MRLP2       | OR9K150      | 211  | 0.002 | 0.12 | 0.848 | 2.23e-03 | (0.63, 0.02) | 0.935   | 0.189    | -0.029   | 0.024 | 0.237     | 0.03   | 0.027     | 0.00             | (0.08, 0.02) | 0.002  | 0.142      | 0.020           | 0.024    | 0.986       | 0.25e-04         | (0.05, 0.0)   | 0.004  | 0.022 | 0.853    | 0.11e-03     | (0.04, 0.05)     |
| 2635.51   | LAYN        | OR9K150      | 211  | 0.002 | 0.13 | 0.850 | 2.45e-03 |              |         |          |          |       |           |        |           |                  |              |        |            |                 |          |             |                  |               |        |       |          |              |                  |

Table S3. Association of type 2 diabetes with deCODE plasma protein

| Gene      | Chr | Uniprot  | nsnp   | b/w | se/w  | pr/w  | cl/w  | FDR                    | Q     | val      | egger  | se/egger | pr/egger           | cl/egger                | egger | Intergenic | pr/Intergenic | cl/Intergenic | b/mode                 | se/mode                 | pr/mode | cl/mode |                    |                        |
|-----------|-----|----------|--------|-----|-------|-------|-------|------------------------|-------|----------|--------|----------|--------------------|-------------------------|-------|------------|---------------|---------------|------------------------|-------------------------|---------|---------|--------------------|------------------------|
| 19615_213 | 1   | NTSC3A   | CHRP90 | 211 | 0.001 | 0.012 | 0.901 | -1.45e-03 (0.02, 0.02) | 0.959 | 0.236    | -0.027 | 0.024    | 0.257              | -0.037 (0.07, 0.02)     | 0.002 | 0.214      | -0.014        | 0.023         | 0.544                  | -0.011 (0.06, 0.03)     | 0.070   | 0.233   | 0.471 (0.02, 0.06) |                        |
| 19640_2   | 1   | PTH      | 019270 | 211 | 0.002 | 0.012 | 0.922 | -1.43e-03 (0.02, 0.02) | 0.969 | 0.165    | -0.042 | 0.025    | 0.398              | -0.10 (0.10, 0.21)      | 0.003 | 0.025      | 0.019         | 0.183         | 0.033                  | -0.037 (0.23, 0.24)     | 0.011   | 0.035   | 0.128              | -0.031 (0.08, 0.01)    |
| 8522_22   | 1   | GDF6     | PN9905 | 211 | 0.001 | 0.012 | 0.901 | 1.46e-03 (0.02, 0.02)  | 0.959 | 0.270    | -0.039 | 0.024    | 0.105              | 0.04 (0.09, 0.01)       | 0.003 | 0.052      | -0.008        | 0.025         | 0.743                  | -0.01 (0.06, 0.04)      | -0.009  | 0.024   | 0.707              | -0.01 (0.05, 0.04)     |
| 8310_6    | 1   | ZGFR     | OR9D40 | 211 | 0.001 | 0.011 | 0.901 | 1.42e-03 (0.02, 0.02)  | 0.959 | 0.085    | 0.011  | 0.024    | 0.162              | 0.01 (0.04, 0.06)       | 0.001 | 0.850      | -0.008        | 0.025         | 0.716                  | -0.01 (0.05, 0.03)      | -0.010  | 0.022   | 0.665              | -0.01 (0.05, 0.03)     |
| 11551_16  | 1   | HMG20B   | 019322 | 211 | 0.002 | 0.012 | 0.922 | -1.43e-03 (0.02, 0.02) | 0.969 | 0.165    | -0.042 | 0.025    | 0.398              | -0.10 (0.10, 0.21)      | 0.003 | 0.025      | 0.019         | 0.183         | 0.033                  | -0.037 (0.23, 0.24)     | 0.011   | 0.035   | 0.128              | -0.031 (0.08, 0.01)    |
| 19170_25  | 1   | POLE3    | GN9F99 | 211 | 0.001 | 0.012 | 0.902 | 1.45e-03 (0.02, 0.02)  | 0.959 | 0.056    | 0.025  | 0.025    | 0.025              | 0.08 (0.10, 0.01)       | 0.004 | 0.008      | -0.027        | 0.021         | 0.196                  | -0.03 (0.07, 0.01)      | -0.029  | 0.024   | 0.228              | -0.03 (0.08, 0.02)     |
| 845_19    | 1   | ATP18A   | 019322 | 211 | 0.002 | 0.012 | 0.902 | 1.41e-03 (0.02, 0.02)  | 0.959 | 0.056    | 0.025  | 0.025    | 0.025              | 0.08 (0.10, 0.01)       | 0.004 | 0.008      | -0.027        | 0.021         | 0.196                  | -0.03 (0.07, 0.01)      | -0.029  | 0.024   | 0.228              | -0.03 (0.08, 0.02)     |
| 106594_18 | 1   | PRR16    | 019322 | 211 | 0.001 | 0.012 | 0.903 | 1.43e-03 (0.02, 0.02)  | 0.959 | 0.262    | -0.029 | 0.024    | 0.225              | -0.03 (0.08, 0.02)      | 0.002 | 0.140      | -0.028        | 0.023         | 0.193                  | -0.03 (0.07, 0.02)      | -0.013  | 0.023   | 0.573              | -0.01 (0.06, 0.03)     |
| 10832_24  | 1   | BALGH1   | OR9U9X | 211 | 0.002 | 0.016 | 0.904 | 1.50e-03 (0.02, 0.03)  | 0.959 | 1.73E-10 | 0.013  | 0.031    | 0.679              | 0.01 (0.05, 0.07)       | 0.001 | 0.583      | 0.003         | 0.025         | 0.919                  | 2.58e-03 (0.06, 0.00)   | 0.000   | 0.028   | 0.755              | 0.01 (0.04, 0.06)      |
| 13895_15  | 1   | EMC1     | 019322 | 211 | 0.001 | 0.012 | 0.902 | 1.43e-03 (0.02, 0.02)  | 0.959 | 0.013    | 0.013  | 0.013    | 0.013              | 0.013 (0.01, 0.01)      | 0.001 | 0.013      | 0.013         | 0.013         | 0.013                  | 0.013 (0.01, 0.01)      | -0.010  | 0.023   | 0.665              | -0.01 (0.06, 0.03)     |
| 14197_2   | 1   | PRDM1    | 019322 | 211 | 0.001 | 0.012 | 0.904 | 1.43e-03 (0.02, 0.02)  | 0.959 | 0.084    | -0.063 | 0.025    | 0.011              | -0.06 (0.11, -0.02)     | 0.004 | 0.003      | -0.028        | 0.003         | 0.222                  | -0.03 (0.08, 0.03)      | -0.016  | 0.022   | 0.474              | -0.02 (0.06, 0.03)     |
| 5457_5    | 1   | COLL12C  | OR9U2C | 211 | 0.002 | 0.013 | 0.903 | 1.54e-03 (0.02, 0.03)  | 0.959 | 0.148    | 0.034  | 0.026    | 0.202              | 0.03 (0.02, 0.00)       | 0.002 | 0.159      | 0.011         | 0.027         | 0.681                  | -0.01 (0.04, 0.06)      | -0.010  | 0.022   | 0.714              | -0.01 (0.06, 0.04)     |
| 19600_11  | 1   | HNT1     | 019322 | 211 | 0.001 | 0.012 | 0.904 | 1.43e-03 (0.02, 0.02)  | 0.959 | 0.164    | 0.044  | 0.024    | 0.144              | 0.04 (0.09, 0.03)       | 0.002 | 0.168      | 0.033         | 0.024         | 0.168                  | 0.03 (0.08, 0.03)       | -0.011  | 0.021   | 0.621              | -0.01 (0.06, 0.04)     |
| 8544_33   | 1   | NELL1    | 029232 | 211 | 0.002 | 0.014 | 0.903 | 1.67e-03 (0.02, 0.03)  | 0.959 | 0.021    | -0.035 | 0.027    | 0.195              | 0.04 (0.09, 0.02)       | 0.002 | 0.116      | -0.020        | 0.025         | 0.621                  | -0.02 (0.07, 0.03)      | -0.017  | 0.025   | 0.511              | -0.02 (0.07, 0.03)     |
| 8456_19   | 1   | KLK4     | P07388 | 211 | 0.001 | 0.012 | 0.903 | 1.42e-03 (0.02, 0.02)  | 0.959 | 0.369    | -0.031 | 0.023    | 0.023              | -0.03 (0.08, 0.02)      | 0.002 | 0.017      | -0.017        | 0.023         | 0.453                  | -0.02 (0.08, 0.03)      | -0.014  | 0.023   | 0.453              | -0.01 (0.07, 0.04)     |
| 10684_1   | 1   | OR9U41   | 019322 | 211 | 0.001 | 0.012 | 0.903 | 1.43e-03 (0.02, 0.02)  | 0.959 | 0.204    | -0.041 | 0.024    | 0.089              | -0.04 (0.09, 0.01)      | 0.004 | 0.058      | 0.014         | 0.021         | 0.599                  | -0.01 (0.05, 0.03)      | -0.022  | 0.024   | 0.358              | -0.02 (0.07, 0.02)     |
| 12221_3   | 1   | CNDNC2   | PA4773 | 211 | 0.002 | 0.013 | 0.903 | 1.55e-03 (0.02, 0.03)  | 0.960 | 0.204    | -0.059 | 0.025    | 0.019              | -0.06 (0.11, -0.01)     | 0.004 | 0.005      | -0.028        | 0.023         | 0.233                  | -0.03 (0.07, 0.02)      | -0.023  | 0.023   | 0.319              | -0.02 (0.07, 0.02)     |
| 17099_43  | 1   | TM6SF8   | 019322 | 211 | 0.002 | 0.012 | 0.905 | 1.41e-03 (0.02, 0.02)  | 0.960 | 0.314    | -0.020 | 0.024    | 0.052              | -0.02 (0.07, 0.03)      | 0.001 | 0.366      | -0.014        | 0.024         | 0.545                  | -0.01 (0.06, 0.03)      | -0.006  | 0.024   | 0.444              | -0.01 (0.06, 0.04)     |
| 5082_51   | 1   | IL1RAPL2 | OR9N90 | 211 | 0.001 | 0.012 | 0.905 | 1.40e-03 (0.02, 0.02)  | 0.960 | 0.341    | -0.049 | 0.023    | 0.035              | -0.05 (0.10, -0.37e-03) | 0.003 | 0.012      | -0.029        | 0.020         | 0.132                  | -0.03 (0.07, 0.01)      | -0.023  | 0.023   | 0.327              | -0.02 (0.07, 0.02)     |
| 11608_22  | 1   | DNAH6    | 019322 | 211 | 0.001 | 0.012 | 0.906 | 1.40e-03 (0.02, 0.02)  | 0.960 | 0.051    | -0.045 | 0.025    | 0.072              | -0.05 (0.09, 0.38e-03)  | 0.003 | 0.032      | -0.030        | 0.020         | 0.195                  | -0.03 (0.07, 0.01)      | -0.052  | 0.023   | 0.402              | -0.05 (0.10, -0.01)    |
| 13896_6   | 1   | LINC11   | 019322 | 211 | 0.001 | 0.012 | 0.906 | 1.59e-03 (0.02, 0.02)  | 0.961 | 0.013    | 0.046  | 0.026    | 0.190              | -0.03 (0.08, 0.02)      | 0.003 | 0.053      | 0.022         | 0.023         | 0.163                  | -0.03 (0.08, 0.02)      | -0.046  | 0.023   | 0.592              | -0.05 (0.09, 0.45e-05) |
| 2831_5    | 1   | XRCPC    | P12956 | 211 | 0.002 | 0.013 | 0.906 | 1.51e-03 (0.02, 0.03)  | 0.961 | 0.031    | -0.044 | 0.025    | 0.083              | -0.04 (0.09, 0.01)      | 0.003 | 0.038      | -0.033        | 0.020         | 0.110                  | -0.03 (0.07, 0.01)      | -0.035  | 0.024   | 0.150              | -0.03 (0.08, 0.01)     |
| 5317_23   | 1   | HTR4     | 043464 | 211 | 0.001 | 0.012 | 0.907 | 1.39e-03 (0.02, 0.02)  | 0.961 | 0.153    | -0.022 | 0.025    | 0.190              | -0.03 (0.08, 0.02)      | 0.002 | 0.146      | -0.028        | 0.020         | 0.163                  | -0.03 (0.08, 0.01)      | -0.041  | 0.023   | 0.133              | -0.04 (0.09, 0.04)     |
| 4132_27   | 1   | FST      | P19883 | 211 | 0.001 | 0.012 | 0.907 | 1.38e-03 (0.02, 0.02)  | 0.961 | 0.084    | -0.053 | 0.025    | 0.034              | -0.05 (0.10, -0.37e-03) | 0.003 | 0.012      | -0.027        | 0.020         | 0.171                  | -0.03 (0.07, 0.01)      | -0.033  | 0.023   | 0.143              | -0.03 (0.08, 0.01)     |
| 13519_112 | 1   | ARHGAP25 | OR9W76 | 211 | 0.002 | 0.012 | 0.908 | 1.35e-03 (0.02, 0.02)  | 0.962 | 0.326    | -0.038 | 0.023    | 0.109              | -0.04 (0.08, 0.01)      | 0.002 | 0.055      | -0.023        | 0.024         | 0.340                  | -0.02 (0.07, 0.02)      | -0.020  | 0.023   | 0.378              | -0.02 (0.07, 0.02)     |
| 13871_40  | 1   | TM6SF8   | 019322 | 211 | 0.002 | 0.016 | 0.910 | 1.81e-03 (0.03, 0.03)  | 0.963 | 1.33E-07 | 0.023  | 0.492    | -0.02 (0.09, 0.03) | 0.001                   | 0.432 | -0.040     | 0.021         | 0.058         | 0.04 (0.08, 0.144e-04) | -0.058                  | 0.025   | 0.304   | -0.01 (0.06, 0.04) |                        |
| 13880_3   | 1   | NAB2     | O15742 | 211 | 0.001 | 0.012 | 0.910 | 1.33e-03 (0.02, 0.02)  | 0.963 | 0.212    | -0.051 | 0.024    | 0.032              | -0.05 (0.10, -0.45e-03) | 0.003 | 0.011      | -0.029        | 0.020         | 0.160                  | -0.03 (0.07, 0.01)      | -0.034  | 0.022   | 0.121              | -0.03 (0.08, 0.01)     |
| 12451_52  | 1   | BACH1    | O14867 | 211 | 0.001 | 0.012 | 0.910 | 1.47e-03 (0.02, 0.03)  | 0.963 | 0.018    | -0.025 | 0.025    | 0.008              | -0.07 (0.12, -0.02)     | 0.005 | 0.001      | -0.024        | 0.022         | 0.264                  | -0.02 (0.07, 0.02)      | -0.025  | 0.025   | 0.319              | -0.02 (0.07, 0.02)     |
| 1344_141  | 1   | TBP1     | 019322 | 211 | 0.001 | 0.012 | 0.912 | 1.34e-03 (0.02, 0.02)  | 0.963 | 0.062    | -0.033 | 0.025    | 0.134              | -0.02 (0.07, 0.01)      | 0.002 | 0.148      | -0.040        | 0.020         | 0.165                  | -0.04 (0.08, 0.135e-04) | -0.049  | 0.023   | 0.595              | -0.05 (0.10, 2.38e-03) |
| 12578_13  | 1   | RF3      | PE1204 | 211 | 0.002 | 0.013 | 0.913 | 1.27e-03 (0.02, 0.02)  | 0.965 | 0.219    | -0.017 | 0.024    | 0.471              | -0.02 (0.06, 0.03)      | 0.003 | 0.440      | -0.011        | 0.025         | 0.651                  | -0.01 (0.06, 0.04)      | 0.000   | 0.022   | 0.989              | -0.00 (0.04, 0.04)     |
| 12004_5   | 1   | GMEB2    | 019322 | 211 | 0.001 | 0.012 | 0.913 | 1.27e-03 (0.02, 0.02)  | 0.965 | 0.028    | -0.033 | 0.025    | 0.190              | -0.03 (0.08, 0.02)      | 0.002 | 0.028      | -0.033        | 0.025         | 0.686                  | -0.02 (0.07, 0.02)      | -0.023  | 0.023   | 0.444              | -0.02 (0.07, 0.02)     |
| 13042_7   | 1   | KCN10A   | O16322 | 211 | 0.001 | 0.012 | 0.912 | 1.29e-03 (0.02, 0.02)  | 0.965 | 0.153    | -0.050 | 0.024    | 0.039              | -0.05 (0.10, -0.27e-03) | 0.003 | 0.014      | -0.020        | 0.020         | 0.299                  | -0.02 (0.06, 0.02)      | -0.029  | 0.024   | 0.220              | -0.03 (0.08, 0.02)     |
| 15670_15  | 1   | C12orf23 | 019322 | 211 | 0.001 | 0.012 | 0.913 | 1.40e-03 (0.02, 0.03)  | 0.965 | 0.034    | -0.070 | 0.025    | 0.006              | -0.07 (0.12, -0.02)     | 0.004 | 0.001      | -0.026        | 0.024         | 0.273                  | -0.03 (0.07, 0.02)      | -0.020  | 0.021   | 0.342              | -0.02 (0.06, 0.02)     |
| 16002_31  | 1   | OCAD1    | 019322 | 211 | 0.001 | 0.012 | 0.913 | 1.45e-03 (0.02, 0.03)  | 0.965 | 0.028    | -0.028 | 0.024    | 0.039              | -0.04 (0.09, 0.01)      | 0.003 | 0.017      | -0.017        | 0.020         | 0.160                  | -0.03 (0.07, 0.01)      | -0.011  | 0.023   | 0.342              | -0.02 (0.06, 0.02)     |
| 19620_16  | 1   | DLG2     | O15751 | 211 | 0.001 | 0.013 | 0.913 | 1.41e-03 (0.02, 0.02)  | 0.965 | 0.028    | -0.028 | 0.026    | 0.284              | -0.03 (0.08, 0.02)      | 0.002 | 0.239      | -0.042        | 0.022         | 0.684                  | -0.01 (0.04, 0.28e-04)  | -0.054  | 0.027   | 0.552              | -0.05 (0.11, 2.12e-04) |
| 3434_34   | 1   | FN1      | O21751 | 211 | 0.001 | 0.012 | 0.913 | 1.26e-03 (0.02, 0.02)  | 0.965 | 0.127    | -0.025 | 0.024    | 0.297              | -0.03 (0.07, 0.02)      | 0.002 | 0.231      | -0.049        | 0.023         | 0.885                  | -0.01 (0.05, 0.04)      | -0.009  | 0.023   | 0.885              | -0.01 (0.05, 0.04)     |
| 1001_60   | 1   | PKSIN    | OR9W62 | 211 | 0.001 | 0.012 | 0.913 | 1.41e-03 (0.02, 0.02)  | 0.965 | 0.029    | -0.028 | 0.024    | 0.039              | -0.04 (0.09, 0.01)      | 0.003 | 0.023      | -0.028        | 0.020         | 0.293                  | -0.02 (0.06, 0.02)      | -0.023  | 0.023   | 0.444              | -0.02 (0.07, 0.02)     |
| 8715_4    | 1   | ABHD14   | OR9UJ0 | 211 | 0.001 | 0.013 | 0.914 | 1.44e-03 (0.02, 0.03)  | 0.965 | 0.065    | -0.063 | 0.026    | 0.109              | -0.06 (                 |       |            |               |               |                        |                         |         |         |                    |                        |

Table S3. Association of type 2 diabetes with deCODE plasma protein

| Protein   | Gene     | UniProt | nsnp | Inverse variance weighted |       |         |                        | MR Egger |          |        |          | Weighted median |                         |           |             | Weighted mode |        |         |                        |                   |       |       |                         |                       |
|-----------|----------|---------|------|---------------------------|-------|---------|------------------------|----------|----------|--------|----------|-----------------|-------------------------|-----------|-------------|---------------|--------|---------|------------------------|-------------------|-------|-------|-------------------------|-----------------------|
|           |          |         |      | b/w                       | se_iw | pval_iw | CI_low                 | FDR_iw   | Q_val    | egger  | se_egger | pval_egger      | CI_egger                | se_median | pval_median | CI_median     | b_mode | se_mode | pval_mode              | CI_mode           |       |       |                         |                       |
| 9413_79   | LPK      | OSVXJ0  | 211  | 0.001                     | 0.013 | 0.968   | -5.35e-04 (0.03, 0.02) | 0.988    | 0.000    | 0.068  | 0.028    | 0.008           | -0.07 (0.11, -0.02)     | 0.004     | 0.003       | -0.035        | 0.020  | 0.077   | -0.04 (0.07, 3.76e-4)  | -0.034            | 0.023 | 0.140 | -0.03 (0.08, 0.01)      |                       |
| 12651_44  | GABARAP  | Q9H988  | 211  | 0.001                     | 0.013 | 0.967   | -5.45e-04 (0.03, 0.03) | 0.988    | 0.000    | 0.068  | 0.028    | 0.022           | -0.08 (0.11, -0.01)     | 0.004     | 0.009       | -0.038        | 0.031  | 0.069   | -0.04 (0.08, 2.95e-4)  | -0.040            | 0.023 | 0.084 | -0.04 (0.08, 0.01)      |                       |
| 12626_19  | MOB1A    | Q9H859  | 211  | 0.000                     | 0.012 | 0.968   | 4.70e-04 (0.02, 0.02)  | 0.989    | 0.003    | 0.028  | 0.025    | 0.283           | -0.03 (0.08, 0.02)      | 0.002     | 0.217       | -0.009        | 0.024  | 0.697   | 0.01 (0.06, 0.04)      | -0.005            | 0.022 | 0.834 | -4.70e-03 (0.05, 0.04)  |                       |
| 19601_15  | ASB9     | Q9H9X3  | 211  | 0.001                     | 0.020 | 0.968   | 8.08e-04 (0.04, 0.04)  | 0.989    | 2.77E-41 | 0.012  | 0.040    | 0.291           | -0.07 (0.07, 0.09)      | 0.001     | 0.744       | -0.030        | 0.020  | 0.133   | -0.03 (0.07, 0.01)     | -0.040            | 0.028 | 0.120 | -0.04 (0.09, 0.01)      |                       |
| 13590_9   | COLKALBP | Q9H974  | 211  | 0.001                     | 0.013 | 0.969   | -5.02e-04 (0.03, 0.02) | 0.989    | 0.004    | 0.029  | 0.014    | 0.084           | -0.04 (0.09, 0.01)      | 0.003     | 0.048       | -0.029        | 0.021  | 0.175   | -0.03 (0.07, 0.01)     | -0.033            | 0.029 | 0.203 | -0.03 (0.08, 0.02)      |                       |
| 7242_14   | YSTM4    | Q9H900  | 211  | 0.001                     | 0.013 | 0.969   | -5.05e-04 (0.03, 0.02) | 0.989    | 0.032    | -0.057 | 0.025    | 0.025           | -0.08 (0.11, -0.01)     | 0.004     | 0.010       | -0.022        | 0.023  | 0.348   | -0.02 (0.07, 0.02)     | -0.018            | 0.024 | 0.508 | -0.02 (0.06, 0.03)      |                       |
| 19195_85  | RPS5     | P48782  | 211  | 0.000                     | 0.013 | 0.970   | -4.86e-04 (0.02, 0.02) | 0.990    | 0.042    | -0.058 | 0.025    | 0.020           | -0.08 (0.11, -0.01)     | 0.004     | 0.007       | -0.026        | 0.020  | 0.682   | -0.02 (0.07, 0.01)     | -0.058            | 0.026 | 0.308 | -0.06 (0.12, 0.03)      |                       |
| 11226_16  | UBES3A   | Q05086  | 211  | 0.000                     | 0.012 | 0.971   | -4.35e-04 (0.02, 0.02) | 0.990    | 0.129    | 0.034  | 0.025    | 0.165           | -0.03 (0.08, 0.01)      | 0.002     | 0.107       | -0.033        | 0.020  | 0.102   | -0.03 (0.07, 0.01)     | -0.025            | 0.024 | 0.309 | -0.02 (0.07, 0.02)      |                       |
| 12830_4   | SAP18    | Q04422  | 211  | 0.000                     | 0.012 | 0.971   | -4.23e-04 (0.02, 0.02) | 0.990    | 0.124    | -0.063 | 0.024    | 0.101           | -0.06 (0.11, -0.02)     | 0.004     | 0.003       | -0.023        | 0.020  | 0.288   | -0.02 (0.07, 0.02)     | -0.014            | 0.022 | 0.522 | -0.01 (0.06, 0.03)      |                       |
| 16180_2   | PKMT1    | Q9H971  | 211  | 0.000                     | 0.012 | 0.971   | -4.22e-04 (0.02, 0.02) | 0.990    | 0.223    | 0.033  | 0.024    | 0.230           | -0.05 (0.10, 0.29e-02)  | 0.002     | 0.108       | -0.033        | 0.011  | 0.162   | -0.03 (0.07, 0.01)     | -0.032            | 0.021 | 0.612 | -0.03 (0.07, 0.01)      |                       |
| 19333_4   | HNRNPK   | P61978  | 211  | 0.000                     | 0.013 | 0.971   | -4.81e-04 (0.03, 0.03) | 0.990    | 0.007    | -0.043 | 0.026    | 0.104           | -0.04 (0.09, 0.01)      | 0.003     | 0.055       | -0.029        | 0.020  | 0.056   | -0.04 (0.08, 9.37e-4)  | -0.047            | 0.024 | 0.505 | -0.05 (0.09, 2.90e-04)  |                       |
| 2761_49   | FCF1B    | Q9H993  | 211  | 0.000                     | 0.012 | 0.971   | -4.28e-04 (0.02, 0.02) | 0.990    | 0.155    | -0.054 | 0.024    | 0.024           | -0.05 (0.10, -0.01)     | 0.003     | 0.009       | -0.025        | 0.019  | 0.188   | -0.02 (0.06, 0.01)     | -0.029            | 0.022 | 0.152 | -0.03 (0.07, 0.01)      |                       |
| 742_5     | CPN1     | Q9H989  | 211  | 0.000                     | 0.012 | 0.971   | -4.28e-04 (0.02, 0.02) | 0.990    | 0.052    | -0.048 | 0.025    | 0.021           | -0.05 (0.10, 0.01)      | 0.003     | 0.042       | -0.026        | 0.020  | 0.245   | -0.03 (0.07, 0.02)     | -0.021            | 0.025 | 0.203 | -0.03 (0.08, 0.02)      |                       |
| 8853_2    | GLO1C4A  | Q9H9M7  | 211  | 0.000                     | 0.012 | 0.970   | -4.43e-04 (0.02, 0.02) | 0.990    | 0.057    | -0.067 | 0.025    | 0.027           | -0.05 (0.10, -0.02)     | 0.004     | 0.002       | -0.020        | 0.022  | 0.352   | -0.02 (0.06, 0.02)     | -0.015            | 0.023 | 0.535 | -0.01 (0.06, 0.03)      |                       |
| 5801_72   | HSP      | P01138  | 211  | 0.000                     | 0.013 | 0.972   | -4.58e-04 (0.02, 0.02) | 0.990    | 0.013    | -0.015 | 0.026    | 0.056           | -0.02 (0.07, 0.04)      | 0.001     | 0.484       | -0.027        | 0.021  | 0.190   | -0.03 (0.07, 0.01)     | -0.025            | 0.022 | 0.631 | -0.03 (0.07, 0.02)      |                       |
| 6580_29   | P2P      | P20742  | 211  | 0.000                     | 0.013 | 0.972   | -4.84e-04 (0.03, 0.03) | 0.990    | 0.001    | -0.050 | 0.028    | 0.054           | -0.05 (0.10, 0.54e-04)  | 0.003     | 0.027       | -0.032        | 0.021  | 0.129   | -0.03 (0.07, 0.01)     | -0.022            | 0.023 | 0.344 | -0.02 (0.07, 0.02)      |                       |
| 9883_29   | GLP1     | Q04780  | 211  | 0.000                     | 0.013 | 0.972   | -4.85e-04 (0.03, 0.03) | 0.990    | 0.014    | -0.039 | 0.028    | 0.137           | -0.04 (0.09, 0.01)      | 0.002     | 0.089       | -0.032        | 0.019  | 0.100   | -0.03 (0.07, 0.01)     | -0.037            | 0.023 | 0.116 | -0.04 (0.08, 0.01)      |                       |
| 11140_56  | COL1A1   | P20452  | 211  | 0.001                     | 0.015 | 0.972   | -5.33e-04 (0.03, 0.03) | 0.990    | 4.34E-07 | 0.033  | 0.030    | 0.280           | 0.03 (0.03, 0.03)       | 0.002     | 0.294       | 0.014         | 0.027  | 0.055   | 0.01 (0.04, 0.01)      | -0.007            | 0.027 | 0.965 | -0.01 (0.06, 0.05)      |                       |
| 8885_41   | RAP2A    | P10114  | 211  | 0.000                     | 0.012 | 0.973   | -3.93e-04 (0.02, 0.02) | 0.991    | 0.174    | 0.003  | 0.024    | 0.916           | 2.52e-03 (0.04, 0.05)   | 0.000     | 0.888       | -0.015        | 0.025  | 0.547   | 0.01 (0.06, 0.03)      | -0.014            | 0.027 | 0.611 | -0.01 (0.07, 0.04)      |                       |
| 12742_160 | TMEM8    | A6NDV4  | 211  | 0.000                     | 0.011 | 0.973   | -3.59e-04 (0.02, 0.02) | 0.991    | 0.126    | 0.030  | 0.024    | 0.178           | -0.02 (0.08, 0.02)      | 0.002     | 0.148       | -0.026        | 0.020  | 0.215   | -0.03 (0.07, 0.02)     | -0.017            | 0.022 | 0.442 | -0.02 (0.06, 0.03)      |                       |
| 15588_1   | DC       | Q92774  | 211  | 0.000                     | 0.014 | 0.973   | -3.48e-04 (0.03, 0.03) | 0.991    | 0.004    | -0.036 | 0.027    | 0.188           | -0.04 (0.09, 0.02)      | 0.002     | 0.115       | 0.018         | 0.023  | 0.061   | -0.02 (0.06, 0.02)     | -0.002            | 0.025 | 0.937 | 1.55e-03 (0.05, 0.04)   |                       |
| 19148_58  | TMM6A    | Q96220  | 211  | 0.000                     | 0.012 | 0.973   | -3.96e-04 (0.02, 0.02) | 0.991    | 0.085    | -0.010 | 0.025    | 0.683           | -0.01 (0.06, 0.04)      | 0.001     | 0.624       | -0.032        | 0.021  | 0.118   | -0.03 (0.07, 0.01)     | -0.034            | 0.024 | 0.165 | -0.03 (0.08, 0.01)      |                       |
| 19186_15  | RPS19    | Q9H919  | 211  | 0.000                     | 0.013 | 0.974   | -4.28e-04 (0.03, 0.03) | 0.991    | 0.015    | -0.075 | 0.025    | 0.003           | -0.08 (0.13, -0.03)     | 0.005     | 0.001       | -0.037        | 0.020  | 0.487   | -0.04 (0.08, 2.55e-4)  | -0.044            | 0.024 | 0.074 | -0.04 (0.09, 4.09e-03)  |                       |
| 19251_56  | SRGN     | P10124  | 211  | 0.000                     | 0.013 | 0.974   | -4.17e-04 (0.03, 0.03) | 0.991    | 0.024    | -0.034 | 0.028    | 0.181           | -0.03 (0.08, 0.02)      | 0.002     | 0.126       | -0.045        | 0.022  | 0.041   | -0.05 (0.09, -1.87e-2) | -0.051            | 0.024 | 0.035 | -0.05 (0.10, -3.81e-03) |                       |
| 2505_49   | GFP3     | Q9H909  | 211  | 0.000                     | 0.012 | 0.974   | -3.90e-04 (0.02, 0.02) | 0.991    | 0.135    | -0.052 | 0.024    | 0.035           | -0.05 (0.10, -3.87e-02) | 0.003     | 0.014       | -0.022        | 0.024  | 0.377   | -0.02 (0.06, 0.03)     | -0.015            | 0.028 | 0.590 | -0.01 (0.07, 0.04)      |                       |
| 3010_53   | TSLP     | Q9H908  | 211  | 0.000                     | 0.012 | 0.975   | -3.74e-04 (0.02, 0.02) | 0.991    | 0.185    | -0.054 | 0.024    | 0.027           | -0.05 (0.10, -0.01)     | 0.003     | 0.011       | -0.025        | 0.020  | 0.265   | -0.03 (0.08, 0.01)     | -0.027            | 0.023 | 0.244 | -0.03 (0.07, 0.02)      |                       |
| 5343_74   | CPE      | P16870  | 211  | 0.001                     | 0.016 | 0.974   | -5.08e-04 (0.03, 0.03) | 0.991    | 1.27E-10 | -0.078 | 0.031    | 0.101           | -0.08 (0.14, -0.02)     | 0.005     | 0.004       | -0.011        | 0.024  | 0.639   | -0.01 (0.06, 0.04)     | -0.011            | 0.024 | 0.640 | -0.01 (0.06, 0.04)      |                       |
| 5693_26   | SIRPB2   | Q9JKA9  | 211  | 0.000                     | 0.013 | 0.974   | -4.18e-04 (0.03, 0.02) | 0.991    | 0.018    | -0.073 | 0.025    | 0.004           | -0.07 (0.12, -0.02)     | 0.005     | 0.001       | -0.030        | 0.020  | 0.124   | -0.03 (0.07, 0.01)     | -0.047            | 0.024 | 0.053 | -0.05 (0.10, 3.59e-04)  |                       |
| 8544_60   | MFT1     | Q9H986  | 211  | 0.000                     | 0.013 | 0.975   | -3.97e-04 (0.03, 0.02) | 0.991    | 0.020    | -0.048 | 0.025    | 0.057           | -0.05 (0.10, 1.08e-02)  | 0.003     | 0.029       | -0.023        | 0.021  | 0.262   | -0.02 (0.06, 0.02)     | -0.018            | 0.022 | 0.412 | -0.02 (0.06, 0.03)      |                       |
| 13482_14  | CNO17    | A5YKX6  | 211  | 0.000                     | 0.013 | 0.975   | -3.97e-04 (0.03, 0.02) | 0.991    | 0.035    | -0.043 | 0.025    | 0.089           | -0.04 (0.09, 0.01)      | 0.003     | 0.051       | -0.021        | 0.019  | 0.267   | -0.02 (0.06, 0.02)     | -0.028            | 0.028 | 0.201 | -0.03 (0.08, 0.02)      |                       |
| 7103_37   | COSBP2   | Q9H9E3  | 211  | 0.000                     | 0.012 | 0.976   | -3.49e-04 (0.02, 0.02) | 0.992    | 0.146    | -0.047 | 0.024    | 0.056           | -0.05 (0.10, 9.21e-04)  | 0.003     | 0.028       | -0.040        | 0.020  | 0.043   | -0.04 (0.08, 3.17e-2)  | -0.034            | 0.023 | 0.055 | -0.04 (0.09, 1.38e-03)  |                       |
| 12532_10  | CAS      | P23280  | 211  | 0.000                     | 0.014 | 0.977   | -3.98e-04 (0.03, 0.03) | 0.992    | 0.007    | -0.087 | 0.028    | 0.001           | 0.05 (0.04, 0.04)       | 0.002     | 0.198       | 0.034         | 0.025  | 0.020   | 0.188                  | 0.03 (0.04, 0.08) | 0.054 | 0.025 | 0.033                   | 0.05 (0.47e-03, 0.01) |
| 3350_40   | CKB1B    | P61024  | 211  | 0.000                     | 0.012 | 0.977   | -3.27e-04 (0.02, 0.02) | 0.992    | 0.171    | -0.038 | 0.024    | 0.121           | -0.04 (0.09, 0.01)      | 0.002     | 0.070       | -0.034        | 0.021  | 0.109   | -0.03 (0.07, 0.01)     | -0.028            | 0.023 | 0.239 | -0.03 (0.07, 0.02)      |                       |
| 14474_63  | PACNSB   | Q9H958  | 211  | 0.000                     | 0.013 | 0.978   | -3.20e-04 (0.02, 0.02) | 0.992    | 0.281    | -0.058 | 0.024    | 0.013           | -0.08 (0.13, -0.01)     | 0.004     | 0.004       | -0.016        | 0.020  | 0.364   | -0.02 (0.06, 0.02)     | -0.042            | 0.024 | 0.884 | -0.04 (0.08, 0.01)      |                       |
| 18402_1   | AMMECR1  | Q6DCAD  | 211  | 0.000                     | 0.013 | 0.977   | -3.78e-04 (0.03, 0.03) | 0.992    | 0.005    | -0.043 | 0.026    | 0.107           | -0.04 (0.09, 0.01)      | 0.003     | 0.065       | -0.028        | 0.021  | 0.214   | -0.03 (0.07, 0.02)     | -0.039            | 0.024 | 0.107 | -0.04 (0.09, 0.01)      |                       |
| 18834_50  | TM22     | Q21980  | 211  | 0.000                     | 0.013 | 0.978   | -3.58e-04 (0.03, 0.03) | 0.992    | 0.021    | -0.042 | 0.026    | 0.105           | -0.04 (0.09, 0.01)      | 0.003     | 0.059       | -0.022        | 0.019  | 0.251   | -0.02 (0.06, 0.02)     | -0.049            | 0.027 | 0.065 | -0.05 (0.10, 2.82e-03)  |                       |
| 8696_21   | FOXP2    | Q9H985  | 211  | 0.000                     | 0.012 | 0.978   | -3.23e-04 (0.02, 0.02) | 0.992    | 0.266    | -0.029 | 0.023    | 0.031           | -0.05 (0.10, -4.79e-02) | 0.003     | 0.012       | -0.013        | 0.020  | 0.558   | -0.01 (0.06, 0.03)     | -0.019            | 0.023 | 0.816 | -0.01 (0.05, 0.03)      |                       |
| 10045_47  | CUL3     | Q13818  | 211  | 0.000                     | 0.012 | 0.978   | -3.20e-04 (0.02, 0.02) | 0.992    | 0.141    | -0.048 | 0.024    | 0.051           | -0.05 (0.10, -1.63e-02) | 0.003     | 0.025       | -0.023        | 0.020  | 0.247   | -0.02 (0.06, 0.02)     | -0.037            | 0.023 | 0.120 | -0.04 (0.08, 0.01)      |                       |
| 11201_19  | CKX10    | Q92778  | 211  | 0.000                     | 0.012 | 0.979   | -3.55e-04 (0.02, 0.02) | 0.992    | 0.016    | -0.024 | 0.024    | 0.370           | -0.02 (0.07, 0.03)      | 0.001     | 0.292       | -0.028        | 0.024  | 0.048   | -0.01 (0.06, 0.03)     | -0.014            | 0.024 | 0.865 | -0.01 (0.06, 0.03)      |                       |
| 18214_2   | GCLM     | P48507  | 211  | 0.000                     | 0.013 | 0.980   | -3.24e-04 (0.02, 0.02) | 0.993    | 0.042    | -0.027 | 0.028    | 0.286           | -0.03 (0.08, 0.02)      | 0.002     | 0.211       | -0.028        | 0.021  | 0.213   | -0.03 (0.07, 0.01)     | -0.035            | 0.026 | 0.171 | -0.04 (0.09, 0.02)      |                       |
| 3060_43   | CS       | P02748  | 211  | 0.000                     | 0.013 | 0.980   | -3.79e-04 (0.03, 0.03) | 0.993    | 2.22E-05 | -0.033 | 0.029    | 0.029           | -0.03 (0.09, 0.02)      | 0.002     | 0.197       | -0.012        | 0.027  | 0.650   | -0.01 (0.07, 0.04)     | -0.021            | 0.025 | 0.407 | -0.02 (0.07, 0.03)      |                       |
| 4475_22   | ZFP70    | Q9H943  | 211  | 0.000                     | 0.013 | 0.980   | -3.41e-04 (0.02, 0.02) | 0.993    | 0.033    | -0.045 | 0.025    | 0.013           |                         |           |             |               |        |         |                        |                   |       |       |                         |                       |





Table S4. Association of type 2 diabetes with UKB-PPP plasma protein.

| UnProt | Gene      | OD      | Inverse variance |       |       |         | MR Egger |         |          |          | Weighted median |            |          |       |             |             |               |             |       |         |           |         |       |       |       |       |      |      |      |
|--------|-----------|---------|------------------|-------|-------|---------|----------|---------|----------|----------|-----------------|------------|----------|-------|-------------|-------------|---------------|-------------|-------|---------|-----------|---------|-------|-------|-------|-------|------|------|------|
|        |           |         | nsp              | blw   | seblw | pvalblw | CI_low   | CI_high | FDR_blw  | p_val    | egger           | pval_egger | CI_egger | egger | Inter_egger | se_weighted | pval_weighted | CI_weighted | bmode | se_mode | pval_mode | CI_mode |       |       |       |       |      |      |      |
| DBP107 | FNLR1     | OD20506 | 132              | 0.033 | 0.013 | 0.003   | 0.01     | 0.006   | 0.077    | 0.003    | 0.029           | 0.01       | 0.04     | 0.06  | 0.01        | 0.368       | 0.022         | 0.25        | 0.36  | 0.02    | 0.037     | 0.011   | 0.228 | 0.065 | 0.01  | 0.04  | 0.06 |      |      |
| P10147 | CCL3      | OD20510 | 132              | 0.035 | 0.014 | 0.002   | 0.01     | 0.008   | 0.129    | 0.002    | 0.59            | 0.02       | 0.04     | 0.05  | 0.001       | 0.019       | 0.014         | 0.02        | 0.33  | 0.02    | 0.037     | 0.011   | 0.228 | 0.065 | 0.01  | 0.04  | 0.06 |      |      |
| P10147 | CDG8      | OD21265 | 132              | 0.039 | 0.015 | 0.010   | 0.04     | 0.017   | 0.080    | 0.47E-09 | 0.016           | 0.029      | 0.57     | 0.02  | 0.04        | 0.003       | 0.028         | 0.015       | 0.20  | 0.43    | 0.02      | 0.037   | 0.011 | 0.228 | 0.065 | 0.01  | 0.04 | 0.06 |      |
| P0262K | ADGR2     | OD20588 | 132              | 0.040 | 0.016 | 0.011   | 0.04     | 0.017   | 0.081    | 4.1E-05  | 0.016           | 0.030      | 0.25     | 0.03  | 0.029       | 0.003       | 0.053         | 0.005       | 0.17  | 0.53    | 0.01      | 0.037   | 0.011 | 0.228 | 0.065 | 0.01  | 0.04 | 0.06 |      |
| P14005 | L3E       | OD20592 | 132              | 0.041 | 0.017 | 0.012   | 0.04     | 0.018   | 0.082    | 4.1E-05  | 0.016           | 0.030      | 0.25     | 0.03  | 0.029       | 0.003       | 0.053         | 0.005       | 0.17  | 0.53    | 0.01      | 0.037   | 0.011 | 0.228 | 0.065 | 0.01  | 0.04 | 0.06 |      |
| P06240 | PLN1      | OD20835 | 132              | 0.039 | 0.015 | 0.011   | 0.04     | 0.017   | 0.083    | 3.44E-08 | 0.016           | 0.030      | 0.25     | 0.03  | 0.029       | 0.003       | 0.053         | 0.005       | 0.17  | 0.53    | 0.01      | 0.037   | 0.011 | 0.228 | 0.065 | 0.01  | 0.04 | 0.06 |      |
| DM517  | SLITR5    | OD20596 | 132              | 0.042 | 0.018 | 0.013   | 0.04     | 0.019   | 0.108    | 0.003    | 0.18            | 0.03       | 0.03     | 0.03  | 0.001       | 0.029       | 0.014         | 0.02        | 0.34  | 0.02    | 0.037     | 0.011   | 0.228 | 0.065 | 0.01  | 0.04  | 0.06 |      |      |
| P30409 | ATF5D1    | OD20597 | 132              | 0.031 | 0.012 | 0.011   | 0.03     | 0.010   | 0.084    | 0.343    | 0.020           | 0.024      | 0.43     | 0.02  | 0.04        | 0.003       | 0.068         | 0.001       | 0.22  | 0.06    | 0.06      | 0.02    | 0.011 | 0.061 | 0.025 | 0.06  | 0.01 | 0.11 |      |
| P12830 | CDH1      | OD20553 | 132              | 0.052 | 0.021 | 0.011   | 0.05     | 0.021   | 0.084    | 2.41E-06 | 0.045           | 0.040      | 0.20     | 0.03  | 0.12        | 0.003       | 0.337         | 0.005       | 0.23  | 0.01    | 0.06      | 0.01    | 0.05  | 0.023 | 0.02  | 0.05  | 0.01 | 0.11 |      |
| P47470 | DOAH1     | OD20598 | 132              | 0.035 | 0.014 | 0.012   | 0.04     | 0.016   | 0.086    | 0.002    | 0.08            | 0.02       | 0.40     | 0.02  | 0.04        | 0.003       | 0.068         | 0.001       | 0.22  | 0.06    | 0.06      | 0.02    | 0.011 | 0.061 | 0.025 | 0.06  | 0.01 | 0.11 |      |
| OT5558 | ENTPD5    | OD21040 | 132              | 0.042 | 0.017 | 0.011   | 0.04     | 0.017   | 0.084    | 1.70E-11 | 0.015           | 0.032      | 0.24     | 0.01  | 0.03        | 0.002       | 0.327         | 0.003       | 0.25  | 0.30    | 0.02      | 0.037   | 0.011 | 0.228 | 0.065 | 0.01  | 0.04 | 0.06 |      |
| P03462 | NRP2      | OD21081 | 132              | 0.041 | 0.016 | 0.011   | 0.04     | 0.017   | 0.084    | 1.27E-17 | 0.047           | 0.032      | 0.14     | 0.05  | 0.11        | 0.003       | 0.335         | 0.004       | 0.23  | 0.01    | 0.06      | 0.01    | 0.05  | 0.023 | 0.02  | 0.05  | 0.01 | 0.11 |      |
| P05567 | TGSI1     | OD20576 | 132              | 0.035 | 0.014 | 0.012   | 0.04     | 0.016   | 0.085    | 0.003    | 0.07            | 0.02       | 0.40     | 0.02  | 0.04        | 0.003       | 0.068         | 0.001       | 0.22  | 0.06    | 0.06      | 0.02    | 0.011 | 0.061 | 0.025 | 0.06  | 0.01 | 0.11 |      |
| P49023 | PNP       | OD20822 | 132              | 0.032 | 0.012 | 0.011   | 0.03     | 0.010   | 0.084    | 3.88E-04 | 0.024           | 0.024      | 0.33     | 0.02  | 0.02        | 0.002       | 0.700         | 0.003       | 0.23  | 0.14    | 0.03      | 0.037   | 0.011 | 0.228 | 0.065 | 0.01  | 0.04 | 0.06 |      |
| P15423 | CXCL1     | OD20576 | 132              | 0.042 | 0.018 | 0.012   | 0.04     | 0.017   | 0.085    | 1.84E-15 | 0.056           | 0.052      | 0.63     | 0.02  | 0.12        | 0.011       | 0.609         | 0.04        | 0.23  | 0.09    | 0.04      | 0.02    | 0.037 | 0.011 | 0.228 | 0.065 | 0.01 | 0.04 | 0.06 |
| P08727 | ROR1B     | OD20598 | 132              | 0.032 | 0.013 | 0.012   | 0.03     | 0.010   | 0.085    | 0.44     | 0.033           | 0.025      | 0.17     | 0.03  | 0.02        | 0.003       | 0.979         | 0.006       | 0.20  | 0.75    | 0.01      | 0.037   | 0.011 | 0.228 | 0.065 | 0.01  | 0.04 | 0.06 |      |
| OT5340 | KCDB2     | OD20163 | 132              | 0.028 | 0.010 | 0.012   | 0.03     | 0.010   | 0.087    | 4.48E-08 | 0.037           | 0.020      | 0.70     | 0.03  | 0.02        | 0.003       | 0.544         | 0.024       | 0.18  | 0.11    | 0.02      | 0.037   | 0.011 | 0.228 | 0.065 | 0.01  | 0.04 | 0.06 |      |
| P11117 | ESFR      | OD21445 | 132              | 0.031 | 0.015 | 0.012   | 0.04     | 0.016   | 0.091    | 2.07E-10 | 0.004           | 0.028      | 0.85     | 0.02  | 0.03        | 0.003       | 0.989         | 0.011       | 0.22  | 0.67    | 0.01      | 0.037   | 0.011 | 0.228 | 0.065 | 0.01  | 0.04 | 0.06 |      |
| P18627 | LAC3      | OD21315 | 132              | 0.034 | 0.014 | 0.012   | 0.03     | 0.010   | 0.087    | 1.74E-05 | 0.047           | 0.027      | 0.81     | 0.05  | 0.01        | 0.01        | 0.590         | 0.025       | 0.22  | 0.22    | 0.03      | 0.037   | 0.011 | 0.228 | 0.065 | 0.01  | 0.04 | 0.06 |      |
| D15123 | ANGPT2    | OD21463 | 132              | 0.036 | 0.014 | 0.012   | 0.04     | 0.016   | 0.088    | 4.15E-08 | 0.001           | 0.027      | 0.91     | 0.06  | 0.04        | 0.003       | 0.920         | 0.010       | 0.23  | 0.12    | 0.03      | 0.037   | 0.011 | 0.228 | 0.065 | 0.01  | 0.04 | 0.06 |      |
| P14687 | BCAT1     | OD20322 | 132              | 0.031 | 0.013 | 0.012   | 0.03     | 0.010   | 0.089    | 0.001    | 0.15            | 0.024      | 0.40     | 0.02  | 0.03        | 0.003       | 0.516         | 0.009       | 0.23  | 0.20    | 0.03      | 0.037   | 0.011 | 0.228 | 0.065 | 0.01  | 0.04 | 0.06 |      |
| P24001 | L3E       | OD20592 | 132              | 0.044 | 0.018 | 0.012   | 0.04     | 0.018   | 0.089    | 2.97E-24 | 0.021           | 0.034      | 0.54     | 0.02  | 0.02        | 0.003       | 0.423         | 0.020       | 0.24  | 0.19    | 0.02      | 0.037   | 0.011 | 0.228 | 0.065 | 0.01  | 0.04 | 0.06 |      |
| DM517  | SLIT1     | OD20596 | 132              | 0.041 | 0.017 | 0.012   | 0.04     | 0.018   | 0.089    | 0.003    | 0.18            | 0.026      | 0.47     | 0.02  | 0.03        | 0.003       | 0.919         | 0.007       | 0.19  | 0.22    | 0.01      | 0.037   | 0.011 | 0.228 | 0.065 | 0.01  | 0.04 | 0.06 |      |
| OT5197 | EPH8B     | OD20882 | 132              | 0.029 | 0.012 | 0.012   | 0.03     | 0.010   | 0.089    | 0.141    | 0.044           | 0.024      | 0.62     | 0.04  | 0.02        | 0.003       | 0.448         | 0.047       | 0.23  | 0.42    | 0.02      | 0.037   | 0.011 | 0.228 | 0.065 | 0.01  | 0.04 | 0.06 |      |
| P35556 | FRP2      | OD30974 | 132              | 0.030 | 0.012 | 0.013   | 0.03     | 0.011   | 0.090    | 0.980    | 0.030           | 0.023      | 0.15     | 0.03  | 0.02        | 0.003       | 0.990         | 0.024       | 0.24  | 0.31    | 0.02      | 0.037   | 0.011 | 0.228 | 0.065 | 0.01  | 0.04 | 0.06 |      |
| P05027 | MMY7      | OD20987 | 132              | 0.029 | 0.015 | 0.013   | 0.03     | 0.011   | 0.090    | 0.604    | 0.016           | 0.023      | 0.44     | 0.02  | 0.03        | 0.003       | 0.968         | 0.022       | 0.23  | 0.34    | 0.02      | 0.037   | 0.011 | 0.228 | 0.065 | 0.01  | 0.04 | 0.06 |      |
| EW0C01 | MRP1      | OD31420 | 132              | 0.030 | 0.012 | 0.013   | 0.03     | 0.011   | 0.091    | 0.280    | 0.033           | 0.023      | 0.19     | 0.03  | 0.02        | 0.003       | 0.858         | 0.005       | 0.23  | 0.20    | 0.03      | 0.037   | 0.011 | 0.228 | 0.065 | 0.01  | 0.04 | 0.06 |      |
| P43490 | NAMPT     | OD21227 | 132              | 0.030 | 0.012 | 0.013   | 0.03     | 0.011   | 0.091    | 0.062    | 0.008           | 0.025      | 0.79     | 0.01  | 0.04        | 0.003       | 0.302         | 0.009       | 0.23  | 0.81    | 0.01      | 0.037   | 0.011 | 0.228 | 0.065 | 0.01  | 0.04 | 0.06 |      |
| OT1972 | ROSI      | OD21024 | 132              | 0.030 | 0.012 | 0.013   | 0.03     | 0.011   | 0.091    | 3.26E-07 | 0.029           | 0.027      | 0.15     | 0.03  | 0.02        | 0.003       | 0.855         | 0.000       | 0.23  | 0.36    | 0.02      | 0.037   | 0.011 | 0.228 | 0.065 | 0.01  | 0.04 | 0.06 |      |
| P44546 | SRFB      | OD21352 | 132              | 0.030 | 0.012 | 0.013   | 0.03     | 0.011   | 0.091    | 0.683    | 0.034           | 0.023      | 0.14     | 0.03  | 0.02        | 0.003       | 0.830         | 0.021       | 0.23  | 0.38    | 0.02      | 0.037   | 0.011 | 0.228 | 0.065 | 0.01  | 0.04 | 0.06 |      |
| P25442 | ROSI      | OD21024 | 132              | 0.030 | 0.012 | 0.013   | 0.03     | 0.011   | 0.091    | 1.81E-08 | 0.015           | 0.028      | 0.60     | 0.01  | 0.03        | 0.003       | 0.812         | 0.000       | 0.23  | 0.38    | 0.02      | 0.037   | 0.011 | 0.228 | 0.065 | 0.01  | 0.04 | 0.06 |      |
| OM907  | VSIG2     | OD21371 | 132              | 0.032 | 0.013 | 0.013   | 0.03     | 0.011   | 0.094    | 0.002    | 0.23            | 0.025      | 0.37     | 0.02  | 0.03        | 0.003       | 0.681         | 0.032       | 0.24  | 0.17    | 0.03      | 0.037   | 0.011 | 0.228 | 0.065 | 0.01  | 0.04 | 0.06 |      |
| P81172 | DYLL1     | OD20925 | 132              | 0.029 | 0.012 | 0.014   | 0.03     | 0.011   | 0.097    | 0.005    | 0.05            | 0.027      | 0.81     | 0.01  | 0.04        | 0.003       | 0.222         | 0.009       | 0.19  | 0.68    | 0.01      | 0.037   | 0.011 | 0.228 | 0.065 | 0.01  | 0.04 | 0.06 |      |
| P02926 | NEB       | OD20578 | 132              | 0.032 | 0.013 | 0.013   | 0.03     | 0.011   | 0.097    | 0.002    | 0.08            | 0.023      | 0.78     | 0.01  | 0.03        | 0.003       | 0.678         | 0.001       | 0.19  | 0.61    | 0.01      | 0.037   | 0.011 | 0.228 | 0.065 | 0.01  | 0.04 | 0.06 |      |
| OM908  | CFHR5     | OD20716 | 132              | 0.041 | 0.016 | 0.014   | 0.04     | 0.017   | 0.097    | 9.00E-21 | 0.040           | 0.032      | 0.21     | 0.04  | 0.02        | 0.003       | 0.969         | 0.048       | 0.22  | 0.32    | 0.03      | 0.037   | 0.011 | 0.228 | 0.065 | 0.01  | 0.04 | 0.06 |      |
| DMW23  | SLAMF7    | OD20602 | 132              | 0.033 | 0.013 | 0.014   | 0.03     | 0.011   | 0.098    | 2.20E-07 | 0.044           | 0.028      | 0.90     | 0.04  | 0.01        | 0.01        | 0.812         | 0.013       | 0.23  | 0.45    | 0.01      | 0.037   | 0.011 | 0.228 | 0.065 | 0.01  | 0.04 | 0.06 |      |
| P11278 | LAMP1     | OD21116 | 132              | 0.031 | 0.013 | 0.013   | 0.03     | 0.011   | 0.098    | 0.002    | 0.08            | 0.023      | 0.78     | 0.01  | 0.03        | 0.003       | 0.678         | 0.001       | 0.19  | 0.61    | 0.01      | 0.037   | 0.011 | 0.228 | 0.065 | 0.01  | 0.04 | 0.06 |      |
| OM214  | LOC102888 | 132     | 0.031            | 0.013 | 0.013 | 0.03    | 0.011    | 0.098   | 1.85E-10 | 0.010    | 0.025           | 0.62       | 0.01     | 0.03  | 0.003       | 0.311       | 0.042         | 0.20        | 0.07  | 0.04    | 0.02      | 0.037   | 0.011 | 0.228 | 0.065 | 0.01  | 0.04 | 0.06 |      |
| P02703 | MTR       | OD20576 | 132              | 0.031 | 0.013 | 0.013   | 0.03     | 0.011   | 0.098    | 0.002    | 0.08            | 0.023      | 0.78     | 0.01  | 0.03        | 0.003       | 0.678         | 0.001       | 0.19  | 0.61    | 0.01      | 0.037   | 0.011 | 0.228 | 0.065 | 0.01  | 0.04 | 0.06 |      |
| OT2432 | COL1A1    | OD20335 | 132              | 0.038 | 0.016 | 0.015   | 0.04     | 0.017   | 0.104    | 1.1E-05  | 0.065           | 0.030      | 0.03     | 0.07  | 0.12        | 0.001       | 0.297         | 0.297       | 0.23  | 0.14    | 0.06      | 0.01    | 0.054 | 0.022 | 0.04  | 0.05  | 0.01 | 0.11 |      |
| DM242  | LAC2      | OD20592 | 132              | 0.030 | 0.012 | 0.015   | 0.03     | 0.011   | 0.104    | 1.18E-04 | 0.020           | 0.024      | 0.36     | 0.02  | 0.03        | 0.003       | 0.838         | 0.022       | 0.23  | 0.38    | 0.02      | 0.037   | 0.011 | 0.228 | 0.065 | 0.01  | 0.04 | 0.06 |      |
| P08267 | HERP      | OD21040 | 132              | 0.034 | 0.015 | 0.014   | 0.04     | 0.018   | 0.104    | 0.002    | 0.08            | 0.023      | 0.78     | 0.01  | 0.03        | 0.003       | 0.678         | 0.001       | 0.19  | 0.61    | 0.01      | 0.037   | 0.011 | 0.228 | 0.065 | 0.01  | 0.04 | 0.06 |      |
| OP2228 | LACR1     | OD21387 | 132              | 0.034 | 0.015 | 0.014   | 0.04     | 0.018   | 0.104    | 5.18E-05 | 0.011           | 0.027      | 0.95     | 0.01  | 0.04        | 0.003       | 0.503         | 0.015       | 0.20  | 0.1     |           |         |       |       |       |       |      |      |      |



Table S4. Association of type 2 diabetes with UKG-PPP plasma protein.

| UnProt  | Gene         | OID     | Inverse variance |        |       |        | MR Egger |                         |      |          | Weighted median |          |        |         |        |        |        |         |       |          |          |       |       |       |       |       |      |
|---------|--------------|---------|------------------|--------|-------|--------|----------|-------------------------|------|----------|-----------------|----------|--------|---------|--------|--------|--------|---------|-------|----------|----------|-------|-------|-------|-------|-------|------|
|         |              |         | nsp              | b/w    | se/w  | CI_low | CI_high  | FDR_IVW                 | Q    | val      | egger           | se/egger | CI_low | CI_high | b/mod  | se/mod | CI_low | CI_high |       |          |          |       |       |       |       |       |      |
| 09JEXK1 | CTSF         | 0021500 | 192              | 0.037  | 0.018 | 0.042  | 0.034    | 0.17(-0.03, 0.07)       | 0.11 | 1.25E-31 | 0.077           | 0.036    | 0.032  | 0.011   | 0.15   | 0.022  | 0.195  | 0.076   | 0.221 | 4.30E-04 | 0.08     | 0.023 | 0.004 | 0.007 | 0.022 | 0.11  |      |
| P24371  | FCAR         | 0020564 | 192              | 0.022  | 0.013 | 0.047  | 0.023    | 0.15(-0.03, 0.05)       | 0.21 | 1.86E-05 | 0.077           | 0.036    | 0.032  | 0.011   | 0.15   | 0.022  | 0.195  | 0.076   | 0.221 | 4.30E-04 | 0.08     | 0.023 | 0.004 | 0.007 | 0.022 | 0.11  |      |
| P27550  | LRRF1        | 0030751 | 192              | -0.025 | 0.012 | 0.042  | -0.023   | 0.02(-0.05, 0.27E-07)   | 0.11 | 4.56E-04 | -0.029          | 0.024    | 0.232  | 0.033   | -0.008 | 0.022  | 0.196  | 0.077   | 0.222 | 4.30E-04 | 0.08     | 0.023 | 0.004 | 0.007 | 0.022 | 0.11  |      |
| P27550  | NRC1         | 0020568 | 192              | 0.024  | 0.012 | 0.042  | 0.023    | 0.02(0.17(-0.04, 0.05)) | 0.11 | 0.005    | -0.002          | 0.223    | 0.033  | 0.032   | 0.011  | 0.15   | 0.022  | 0.195   | 0.076 | 0.221    | 4.30E-04 | 0.08  | 0.023 | 0.004 | 0.007 | 0.022 | 0.11 |
| P27550  | PRKRI        | 0020568 | 192              | 0.024  | 0.012 | 0.042  | 0.023    | 0.02(0.17(-0.04, 0.05)) | 0.11 | 0.005    | -0.002          | 0.223    | 0.033  | 0.032   | 0.011  | 0.15   | 0.022  | 0.195   | 0.076 | 0.221    | 4.30E-04 | 0.08  | 0.023 | 0.004 | 0.007 | 0.022 | 0.11 |
| 09VW97  | RBOB1        | 0020374 | 192              | 0.034  | 0.017 | 0.042  | 0.033    | 0.12(0.03, 0.07)        | 0.11 | 3.08E-18 | 0.055           | 0.027    | 0.887  | 0.033   | 0.087  | 0.007  | 0.044  | 0.022   | 0.291 | 0.005    | 0.022    | 0.826 | 0.033 | 0.087 | 0.007 | 0.044 |      |
| 015391  | TLR1         | 0020568 | 192              | 0.024  | 0.012 | 0.042  | 0.023    | 0.02(0.17(-0.04, 0.05)) | 0.11 | 0.005    | -0.002          | 0.223    | 0.033  | 0.032   | 0.011  | 0.15   | 0.022  | 0.195   | 0.076 | 0.221    | 4.30E-04 | 0.08  | 0.023 | 0.004 | 0.007 | 0.022 | 0.11 |
| 09PM1   | LRRP2B       | 0020374 | 192              | 0.028  | 0.014 | 0.042  | 0.023    | 0.03(0.03, 0.05)        | 0.12 | 0.004    | 0.022           | 0.227    | 0.041  | 0.022   | 0.027  | 0.141  | 0.022  | 0.195   | 0.076 | 0.221    | 4.30E-04 | 0.08  | 0.023 | 0.004 | 0.007 | 0.022 | 0.11 |
| 06K76   | MYO6         | 0030717 | 192              | 0.034  | 0.017 | 0.043  | 0.033    | 0.10(0.03, 0.07)        | 0.11 | 7.21E-28 | 0.019           | 0.032    | 0.800  | 0.033   | 0.087  | 0.007  | 0.044  | 0.022   | 0.291 | 0.005    | 0.022    | 0.826 | 0.033 | 0.087 | 0.007 | 0.044 |      |
| 09WV03  | CHCHD10      | 0020568 | 192              | 0.022  | 0.013 | 0.047  | 0.023    | 0.02(0.17(-0.04, 0.05)) | 0.11 | 0.005    | -0.002          | 0.223    | 0.033  | 0.032   | 0.011  | 0.15   | 0.022  | 0.195   | 0.076 | 0.221    | 4.30E-04 | 0.08  | 0.023 | 0.004 | 0.007 | 0.022 | 0.11 |
| 099972  | BIOC         | 0021211 | 192              | -0.029 | 0.014 | 0.043  | -0.03    | 0.03(-0.06, 4.8E-07)    | 0.11 | 9.69E-09 | -0.013          | 0.027    | 0.629  | 0.033   | 0.027  | 0.141  | 0.022  | 0.195   | 0.076 | 0.221    | 4.30E-04 | 0.08  | 0.023 | 0.004 | 0.007 | 0.022 | 0.11 |
| 012544  | ZDNR         | 0020683 | 192              | 0.043  | 0.021 | 0.043  | 0.04     | 0.12(0.03, 0.19)        | 0.11 | 2.21E-05 | 0.028           | 0.042    | 0.499  | 0.033   | 0.105  | 0.011  | 0.074  | 0.003   | 0.220 | 0.005    | 0.022    | 0.826 | 0.033 | 0.087 | 0.007 | 0.044 |      |
| 09M278  | CHL1         | 0020721 | 192              | 0.022  | 0.013 | 0.047  | 0.023    | 0.02(0.17(-0.04, 0.05)) | 0.11 | 0.005    | -0.002          | 0.223    | 0.033  | 0.032   | 0.011  | 0.15   | 0.022  | 0.195   | 0.076 | 0.221    | 4.30E-04 | 0.08  | 0.023 | 0.004 | 0.007 | 0.022 | 0.11 |
| 09HBE5  | L2MR         | 0030441 | 192              | 0.024  | 0.012 | 0.044  | 0.023    | 0.02(0.03, 0.05)        | 0.12 | 0.005    | 0.022           | 0.227    | 0.041  | 0.022   | 0.027  | 0.141  | 0.022  | 0.195   | 0.076 | 0.221    | 4.30E-04 | 0.08  | 0.023 | 0.004 | 0.007 | 0.022 | 0.11 |
| P25295  | PRK1         | 0020568 | 192              | 0.024  | 0.012 | 0.044  | 0.023    | 0.02(0.17(-0.04, 0.05)) | 0.11 | 0.005    | -0.002          | 0.223    | 0.033  | 0.032   | 0.011  | 0.15   | 0.022  | 0.195   | 0.076 | 0.221    | 4.30E-04 | 0.08  | 0.023 | 0.004 | 0.007 | 0.022 | 0.11 |
| P28907  | CD38         | 0021316 | 192              | 0.023  | 0.011 | 0.044  | 0.023    | 0.02(0.23(-0.04, 0.05)) | 0.11 | 4.47E-06 | 0.001           | 0.022    | 0.586  | 0.033   | 0.105  | 0.011  | 0.074  | 0.003   | 0.220 | 0.005    | 0.022    | 0.826 | 0.033 | 0.087 | 0.007 | 0.044 |      |
| 09P186  | PLB1         | 0030310 | 192              | 0.023  | 0.012 | 0.044  | 0.023    | 0.02(0.03, 0.05)        | 0.12 | 1.81E-11 | 0.009           | 0.022    | 0.679  | 0.033   | 0.105  | 0.011  | 0.074  | 0.003   | 0.220 | 0.005    | 0.022    | 0.826 | 0.033 | 0.087 | 0.007 | 0.044 |      |
| 013410  | ETNA11       | 0020568 | 192              | 0.023  | 0.012 | 0.044  | 0.023    | 0.02(0.23(-0.04, 0.05)) | 0.11 | 0.005    | -0.002          | 0.223    | 0.033  | 0.032   | 0.011  | 0.15   | 0.022  | 0.195   | 0.076 | 0.221    | 4.30E-04 | 0.08  | 0.023 | 0.004 | 0.007 | 0.022 | 0.11 |
| 015683  | KITN         | 0030410 | 192              | -0.028 | 0.014 | 0.045  | -0.03    | 0.03(-0.06, 4.8E-07)    | 0.11 | 2.42E-06 | 0.013           | 0.027    | 0.634  | 0.033   | 0.105  | 0.011  | 0.074  | 0.003   | 0.220 | 0.005    | 0.022    | 0.826 | 0.033 | 0.087 | 0.007 | 0.044 |      |
| 017121  | KIT          | 0020370 | 192              | -0.028 | 0.014 | 0.045  | -0.03    | 0.03(-0.06, 4.8E-07)    | 0.11 | 2.42E-06 | 0.013           | 0.027    | 0.634  | 0.033   | 0.105  | 0.011  | 0.074  | 0.003   | 0.220 | 0.005    | 0.022    | 0.826 | 0.033 | 0.087 | 0.007 | 0.044 |      |
| 09HCL5  | PREB         | 0020939 | 192              | 0.029  | 0.015 | 0.046  | 0.024    | 0.02(0.03, 0.05)        | 0.12 | 0.005    | 0.022           | 0.502    | 0.033  | 0.105   | 0.011  | 0.074  | 0.003  | 0.220   | 0.005 | 0.022    | 0.826    | 0.033 | 0.087 | 0.007 | 0.044 |       |      |
| 015116  | L2MR         | 0021210 | 192              | -0.024 | 0.012 | 0.046  | -0.02    | 0.02(-0.05, 4.0E-06)    | 0.12 | 0.005    | 0.006           | 0.225    | 0.033  | 0.032   | 0.011  | 0.15   | 0.022  | 0.195   | 0.076 | 0.221    | 4.30E-04 | 0.08  | 0.023 | 0.004 | 0.007 | 0.022 | 0.11 |
| 09M278  | COL1A1       | 0020398 | 192              | -0.029 | 0.014 | 0.046  | -0.03    | 0.03(-0.06, 4.45E-07)   | 0.11 | 4.02E-07 | -0.004          | 0.027    | 0.611  | 0.033   | 0.105  | 0.011  | 0.074  | 0.003   | 0.220 | 0.005    | 0.022    | 0.826 | 0.033 | 0.087 | 0.007 | 0.044 |      |
| 09JURP4 | DMK1         | 0020284 | 192              | 0.021  | 0.011 | 0.046  | 0.023    | 0.02(0.03, 0.05)        | 0.12 | 5.27E-18 | 0.024           | 0.030    | 0.427  | 0.033   | 0.105  | 0.011  | 0.074  | 0.003   | 0.220 | 0.005    | 0.022    | 0.826 | 0.033 | 0.087 | 0.007 | 0.044 |      |
| P21588  | NTF5         | 0021498 | 192              | 0.028  | 0.013 | 0.046  | 0.023    | 0.03(0.03, 0.05)        | 0.12 | 1.08E-07 | 0.019           | 0.026    | 0.478  | 0.033   | 0.105  | 0.011  | 0.074  | 0.003   | 0.220 | 0.005    | 0.022    | 0.826 | 0.033 | 0.087 | 0.007 | 0.044 |      |
| P15684  | TGFB         | 0020939 | 192              | 0.028  | 0.014 | 0.047  | 0.023    | 0.03(0.03, 0.05)        | 0.12 | 1.43E-08 | 0.013           | 0.027    | 0.508  | 0.033   | 0.105  | 0.011  | 0.074  | 0.003   | 0.220 | 0.005    | 0.022    | 0.826 | 0.033 | 0.087 | 0.007 | 0.044 |      |
| 09WV04  | PTFB         | 0030504 | 192              | 0.028  | 0.014 | 0.047  | 0.023    | 0.03(0.03, 0.05)        | 0.12 | 1.68E-04 | 0.006           | 0.027    | 0.833  | 0.033   | 0.105  | 0.011  | 0.074  | 0.003   | 0.220 | 0.005    | 0.022    | 0.826 | 0.033 | 0.087 | 0.007 | 0.044 |      |
| P01992  | ERC1         | 0031222 | 192              | 0.024  | 0.012 | 0.042  | 0.023    | 0.02(0.03, 0.05)        | 0.12 | 0.005    | 0.021           | 0.545    | 0.033  | 0.105   | 0.011  | 0.074  | 0.003  | 0.220   | 0.005 | 0.022    | 0.826    | 0.033 | 0.087 | 0.007 | 0.044 |       |      |
| P11927  | CTN1         | 0020937 | 192              | 0.024  | 0.012 | 0.042  | 0.023    | 0.02(0.03, 0.05)        | 0.12 | 0.005    | 0.021           | 0.545    | 0.033  | 0.105   | 0.011  | 0.074  | 0.003  | 0.220   | 0.005 | 0.022    | 0.826    | 0.033 | 0.087 | 0.007 | 0.044 |       |      |
| P01133  | EGF          | 0020288 | 192              | -0.028 | 0.014 | 0.048  | -0.03    | 0.03(-0.06, 4.44E-07)   | 0.11 | 3.82E-05 | -0.012          | 0.027    | 0.652  | 0.033   | 0.105  | 0.011  | 0.074  | 0.003   | 0.220 | 0.005    | 0.022    | 0.826 | 0.033 | 0.087 | 0.007 | 0.044 |      |
| 09WV15  | GMAPT        | 0020945 | 192              | 0.029  | 0.015 | 0.048  | 0.024    | 0.02(0.03, 0.05)        | 0.12 | 0.005    | 0.021           | 0.545    | 0.033  | 0.105   | 0.011  | 0.074  | 0.003  | 0.220   | 0.005 | 0.022    | 0.826    | 0.033 | 0.087 | 0.007 | 0.044 |       |      |
| 09WV19  | LYC6         | 0020945 | 192              | 0.032  | 0.016 | 0.048  | 0.024    | 0.03(0.03, 0.05)        | 0.12 | 0.005    | 0.021           | 0.545    | 0.033  | 0.105   | 0.011  | 0.074  | 0.003  | 0.220   | 0.005 | 0.022    | 0.826    | 0.033 | 0.087 | 0.007 | 0.044 |       |      |
| P11521  | SCG2         | 0020400 | 192              | 0.029  | 0.015 | 0.049  | 0.024    | 0.03(0.03, 0.05)        | 0.12 | 0.005    | 0.021           | 0.545    | 0.033  | 0.105   | 0.011  | 0.074  | 0.003  | 0.220   | 0.005 | 0.022    | 0.826    | 0.033 | 0.087 | 0.007 | 0.044 |       |      |
| 0126301 | DEFB4DEFB4L1 | 0020937 | 192              | 0.029  | 0.015 | 0.049  | 0.024    | 0.03(0.03, 0.05)        | 0.12 | 0.005    | 0.021           | 0.545    | 0.033  | 0.105   | 0.011  | 0.074  | 0.003  | 0.220   | 0.005 | 0.022    | 0.826    | 0.033 | 0.087 | 0.007 | 0.044 |       |      |
| 09KX74  | RSPQ1        | 0021415 | 192              | -0.027 | 0.014 | 0.050  | -0.03    | 0.03(-0.06, 4.79E-07)   | 0.11 | 0.005    | 0.021           | 0.545    | 0.033  | 0.105   | 0.011  | 0.074  | 0.003  | 0.220   | 0.005 | 0.022    | 0.826    | 0.033 | 0.087 | 0.007 | 0.044 |       |      |
| 09L313  | HSD17B4      | 0030579 | 192              | 0.043  | 0.022 | 0.050  | 0.04     | 0.12(0.03, 0.19)        | 0.11 | 7.17E-10 | 0.029           | 0.047    | 0.830  | 0.033   | 0.105  | 0.011  | 0.074  | 0.003   | 0.220 | 0.005    | 0.022    | 0.826 | 0.033 | 0.087 | 0.007 | 0.044 |      |
| 043898  | SIGLEC5      | 0020939 | 192              | 0.029  | 0.015 | 0.050  | 0.024    | 0.03(0.03, 0.05)        | 0.12 | 0.005    | 0.021           | 0.545    | 0.033  | 0.105   | 0.011  | 0.074  | 0.003  | 0.220   | 0.005 | 0.022    | 0.826    | 0.033 | 0.087 | 0.007 | 0.044 |       |      |
| 09M477  | HSD17B4      | 0030579 | 192              | 0.043  | 0.022 | 0.050  | 0.04     | 0.12(0.03, 0.19)        | 0.11 | 7.17E-10 | 0.029           | 0.047    | 0.830  | 0.033   | 0.105  | 0.011  | 0.074  | 0.003   | 0.220 | 0.005    | 0.022    | 0.826 | 0.033 | 0.087 | 0.007 | 0.044 |      |
| 09M477  | HSD17B4      | 0030579 | 192              | 0.043  | 0.022 | 0.050  | 0.04     | 0.1                     |      |          |                 |          |        |         |        |        |        |         |       |          |          |       |       |       |       |       |      |



Table S4. Association of type 2 diabetes with UKB-PPP plasma protein.

| UnProt  | Gene    | Chr | OD   | Inverse variance co-kriging |       |       |        | MR Egger |         |          |        | Weighted median |       |          |            | Weighted mode |       |          |            |          |        |       |      |       |       |       |           |               |               |
|---------|---------|-----|------|-----------------------------|-------|-------|--------|----------|---------|----------|--------|-----------------|-------|----------|------------|---------------|-------|----------|------------|----------|--------|-------|------|-------|-------|-------|-----------|---------------|---------------|
|         |         |     |      | nsp                         | b/w   | se/w  | pval/w | CI_low   | CI_high | FDR_low  | U      | pval            | egger | se/egger | pval/egger | CI_egger      | egger | se/egger | pval/egger | CI_egger |        |       |      |       |       |       |           |               |               |
| DTF85   | GIPC2   | 03  | 0115 | 0.07                        | 0.12  | 0.155 | 0.02   | 0.01     | 0.04    | 0.474    | 0.018  | 0.024           | 0.879 | -0.01    | 0.06       | 0.04          | 0.022 | 0.181    | -0.012     | 0.200    | 0.556  | -0.01 | 0.05 | 0.03  | 0.004 | 0.022 | 0.842     | 4.43e-03      | (0.04, 0.05)  |
| P1484   | PCG1    | 02  | 0101 | 0.02                        | 0.03  | 0.154 | 0.02   | 0.01     | 0.04    | 0.474    | 0.018  | 0.024           | 0.879 | -0.01    | 0.06       | 0.04          | 0.022 | 0.181    | -0.012     | 0.200    | 0.556  | -0.01 | 0.05 | 0.03  | 0.004 | 0.022 | 0.842     | 4.43e-03      | (0.04, 0.05)  |
| GRMUM5  | NEBF    | 03  | 0214 | 0.05                        | 0.156 | 0.02  | 0.01   | 0.05     | 0.475   | 1.72E-05 | 0.024  | 0.288           | 0.02  | -0.03    | 0.08       | 0.000         | 0.878 | 0.006    | 0.023      | 0.785    | -0.01  | 0.05  | 0.04 | 0.005 | 0.021 | 0.991 | -2.89e-04 | (0.05, 0.05)  |               |
| P21860  | ENEB    | 02  | 0201 | 0.14                        | 0.157 | 0.02  | 0.01   | 0.05     | 0.478   | 8.27E-08 | 0.035  | 0.227           | 0.00  | 0.03     | 0.02       | 0.009         | 0.517 | 0.048    | 0.021      | 0.202    | 0.05   | 0.01  | 0.09 | 0.004 | 0.023 | 1.13e | 0.01      | (0.01, 0.08)  |               |
| D69971  | CD160   | 06  | 0201 | 0.02                        | 0.157 | 0.02  | 0.01   | 0.05     | 0.478   | 8.27E-08 | 0.035  | 0.227           | 0.00  | 0.03     | 0.02       | 0.009         | 0.517 | 0.048    | 0.021      | 0.202    | 0.05   | 0.01  | 0.09 | 0.004 | 0.023 | 1.13e | 0.01      | (0.01, 0.08)  |               |
| P05113  | L5      | 02  | 0201 | 0.12                        | 0.157 | 0.02  | 0.01   | 0.05     | 0.478   | 8.27E-08 | 0.035  | 0.227           | 0.00  | 0.03     | 0.02       | 0.009         | 0.517 | 0.048    | 0.021      | 0.202    | 0.05   | 0.01  | 0.09 | 0.004 | 0.023 | 1.13e | 0.01      | (0.01, 0.08)  |               |
| DT4278  | RMH9    | 02  | 0101 | 0.02                        | 0.157 | 0.02  | 0.01   | 0.05     | 0.478   | 8.27E-08 | 0.035  | 0.227           | 0.00  | 0.03     | 0.02       | 0.009         | 0.517 | 0.048    | 0.021      | 0.202    | 0.05   | 0.01  | 0.09 | 0.004 | 0.023 | 1.13e | 0.01      | (0.01, 0.08)  |               |
| FR3252  | ADAM5   | 02  | 0101 | 0.03                        | 0.159 | 0.02  | 0.01   | 0.04     | 0.481   | 3.58E-04 | -0.022 | 0.268           | 0.35  | 0.02     | 0.07       | 0.003         | 0.068 | 0.024    | 0.023      | 0.289    | 0.02   | 0.01  | 0.04 | 0.012 | 0.021 | 0.431 | 0.02      | (0.02, 0.06)  |               |
| DMC42   | RNF49   | 02  | 0101 | 0.02                        | 0.159 | 0.02  | 0.01   | 0.04     | 0.481   | 3.58E-04 | -0.022 | 0.268           | 0.35  | 0.02     | 0.07       | 0.003         | 0.068 | 0.024    | 0.023      | 0.289    | 0.02   | 0.01  | 0.04 | 0.012 | 0.021 | 0.431 | 0.02      | (0.02, 0.06)  |               |
| DMC42   | CSH1    | 02  | 0101 | 0.02                        | 0.159 | 0.02  | 0.01   | 0.04     | 0.481   | 3.58E-04 | -0.022 | 0.268           | 0.35  | 0.02     | 0.07       | 0.003         | 0.068 | 0.024    | 0.023      | 0.289    | 0.02   | 0.01  | 0.04 | 0.012 | 0.021 | 0.431 | 0.02      | (0.02, 0.06)  |               |
| NR718   | KLK1    | 03  | 0102 | 0.20                        | 0.160 | 0.02  | 0.01   | 0.05     | 0.484   | 4.73E-08 | -0.028 | 0.227           | 0.43  | -0.03    | 0.08       | 0.003         | 0.051 | -0.001   | 0.018      | 0.471    | -1.23e | -0.03 | 0.04 | 0.003 | 0.021 | 0.899 | 2.95e-03  | (0.04, 0.04)  |               |
| I12421  | MSLN    | 02  | 0101 | 0.14                        | 0.160 | 0.02  | 0.01   | 0.05     | 0.484   | 4.73E-08 | -0.028 | 0.227           | 0.43  | -0.03    | 0.08       | 0.003         | 0.051 | -0.001   | 0.018      | 0.471    | -1.23e | -0.03 | 0.04 | 0.003 | 0.021 | 0.899 | 2.95e-03  | (0.04, 0.04)  |               |
| P049819 | PDGFA   | 02  | 0101 | 0.02                        | 0.160 | 0.02  | 0.01   | 0.05     | 0.484   | 4.73E-08 | -0.028 | 0.227           | 0.43  | -0.03    | 0.08       | 0.003         | 0.051 | -0.001   | 0.018      | 0.471    | -1.23e | -0.03 | 0.04 | 0.003 | 0.021 | 0.899 | 2.95e-03  | (0.04, 0.04)  |               |
| P16422  | EPCAM   | 02  | 0201 | 0.16                        | 0.161 | 0.02  | 0.01   | 0.05     | 0.485   | 2.14E-10 | 0.030  | 0.227           | 0.43  | -0.03    | 0.08       | 0.003         | 0.051 | -0.001   | 0.018      | 0.471    | -1.23e | -0.03 | 0.04 | 0.003 | 0.021 | 0.899 | 2.95e-03  | (0.04, 0.04)  |               |
| DL0178  | CLU2    | 02  | 0102 | 0.162                       | 0.162 | 0.02  | 0.01   | 0.05     | 0.489   | 0.029    | -0.021 | 0.256           | 0.06  | 0.01     | 0.09       | 0.003         | 0.050 | 0.006    | 0.015      | 0.242    | 0.02   | 0.01  | 0.04 | 0.003 | 0.021 | 0.899 | 2.95e-03  | (0.04, 0.04)  |               |
| P25378  | ELAVL4  | 02  | 0101 | 0.02                        | 0.163 | 0.02  | 0.01   | 0.04     | 0.490   | 0.001    | 0.011  | 0.225           | 0.65  | 0.01     | 0.04       | 0.006         | 0.070 | 0.023    | 0.025      | 0.364    | 0.02   | 0.01  | 0.04 | 0.003 | 0.021 | 0.899 | 2.95e-03  | (0.04, 0.04)  |               |
| PS6499  | FAM3B   | 02  | 0101 | 0.03                        | 0.163 | 0.02  | 0.01   | 0.04     | 0.490   | 1.50E-05 | 0.021  | 0.225           | 0.48  | 0.02     | 0.03       | 0.006         | 0.070 | 0.023    | 0.025      | 0.364    | 0.02   | 0.01  | 0.04 | 0.003 | 0.021 | 0.899 | 2.95e-03  | (0.04, 0.04)  |               |
| SNMWR5  | TOP11   | 02  | 0101 | 0.02                        | 0.163 | 0.02  | 0.01   | 0.04     | 0.490   | 1.50E-05 | 0.021  | 0.225           | 0.48  | 0.02     | 0.03       | 0.006         | 0.070 | 0.023    | 0.025      | 0.364    | 0.02   | 0.01  | 0.04 | 0.003 | 0.021 | 0.899 | 2.95e-03  | (0.04, 0.04)  |               |
| DMC237  | PP1R12B | 02  | 0101 | 0.02                        | 0.164 | 0.02  | 0.01   | 0.04     | 0.491   | 0.463    | 0.008  | 0.223           | 0.79  | 0.01     | 0.04       | 0.005         | 0.070 | 0.023    | 0.025      | 0.364    | 0.02   | 0.01  | 0.04 | 0.003 | 0.021 | 0.899 | 2.95e-03  | (0.04, 0.04)  |               |
| DMC237  | CDON    | 02  | 0101 | 0.02                        | 0.165 | 0.02  | 0.01   | 0.04     | 0.492   | 9.01E-08 | 0.011  | 0.228           | 0.82  | 0.01     | 0.04       | 0.005         | 0.070 | 0.023    | 0.025      | 0.364    | 0.02   | 0.01  | 0.04 | 0.003 | 0.021 | 0.899 | 2.95e-03  | (0.04, 0.04)  |               |
| P14410  | CTLA4   | 02  | 0101 | 0.02                        | 0.165 | 0.02  | 0.01   | 0.04     | 0.492   | 9.01E-08 | 0.011  | 0.228           | 0.82  | 0.01     | 0.04       | 0.005         | 0.070 | 0.023    | 0.025      | 0.364    | 0.02   | 0.01  | 0.04 | 0.003 | 0.021 | 0.899 | 2.95e-03  | (0.04, 0.04)  |               |
| NR718   | GRN     | 02  | 0101 | 0.02                        | 0.164 | 0.02  | 0.01   | 0.04     | 0.492   | 2.82E-07 | 0.019  | 0.230           | 0.82  | 0.01     | 0.04       | 0.005         | 0.070 | 0.023    | 0.025      | 0.364    | 0.02   | 0.01  | 0.04 | 0.003 | 0.021 | 0.899 | 2.95e-03  | (0.04, 0.04)  |               |
| PS4370  | PNLRP1  | 02  | 0101 | 0.02                        | 0.164 | 0.02  | 0.01   | 0.04     | 0.492   | 2.82E-07 | 0.019  | 0.230           | 0.82  | 0.01     | 0.04       | 0.005         | 0.070 | 0.023    | 0.025      | 0.364    | 0.02   | 0.01  | 0.04 | 0.003 | 0.021 | 0.899 | 2.95e-03  | (0.04, 0.04)  |               |
| P14411  | CSF2    | 02  | 0101 | 0.04                        | 0.165 | 0.02  | 0.01   | 0.05     | 0.492   | 0.002    | -0.005 | 0.268           | 0.81  | -4.62e   | -0.03      | 0.05          | 0.001 | 0.299    | 0.013      | 0.021    | 0.359  | 0.01  | 0.05 | 0.03  | 0.017 | 0.024 | 0.470     | -0.02         | (-0.03, 0.03) |
| P22307  | SCF2    | 02  | 0101 | 0.02                        | 0.165 | 0.02  | 0.01   | 0.04     | 0.493   | 0.633    | 0.016  | 0.223           | 0.49  | 0.02     | 0.03       | 0.006         | 0.065 | 0.006    | 0.023      | 0.791    | -0.01  | 0.05  | 0.04 | 0.006 | 0.028 | 0.816 | 0.01      | (0.01, 0.06)  |               |
| P44775  | TDGF2   | 02  | 0101 | 0.02                        | 0.165 | 0.02  | 0.01   | 0.04     | 0.493   | 0.633    | 0.016  | 0.223           | 0.49  | 0.02     | 0.03       | 0.006         | 0.065 | 0.006    | 0.023      | 0.791    | -0.01  | 0.05  | 0.04 | 0.006 | 0.028 | 0.816 | 0.01      | (0.01, 0.06)  |               |
| DMC237  | FCRL6   | 02  | 0201 | 0.05                        | 0.166 | 0.02  | 0.01   | 0.05     | 0.493   | 1.01E-17 | 0.019  | 0.228           | 0.50  | 0.02     | 0.04       | 0.007         | 0.069 | 0.011    | 0.019      | 0.551    | 0.01   | 0.05  | 0.04 | 0.006 | 0.028 | 0.816 | 0.01      | (0.01, 0.06)  |               |
| P12326  | PCL     | 02  | 0101 | 0.04                        | 0.166 | 0.02  | 0.01   | 0.05     | 0.494   | 1.83E-07 | -0.003 | 0.228           | 0.91  | -3.36e   | -0.03      | 0.05          | 0.001 | 0.327    | -0.003     | 0.021    | -3.45e | -0.03 | 0.04 | 0.006 | 0.028 | 0.816 | 0.01      | (0.01, 0.06)  |               |
| DT512   | ZNF1    | 02  | 0101 | 0.02                        | 0.166 | 0.02  | 0.01   | 0.04     | 0.494   | 1.83E-07 | -0.003 | 0.228           | 0.91  | -3.36e   | -0.03      | 0.05          | 0.001 | 0.327    | -0.003     | 0.021    | -3.45e | -0.03 | 0.04 | 0.006 | 0.028 | 0.816 | 0.01      | (0.01, 0.06)  |               |
| P02776  | FCF2    | 02  | 0201 | 0.16                        | 0.169 | 0.02  | 0.01   | 0.05     | 0.492   | 1.58E-11 | -0.029 | 0.231           | 0.33  | -0.03    | 0.09       | 0.003         | 0.294 | 0.014    | 0.024      | 0.541    | -0.01  | 0.05  | 0.03 | 0.016 | 0.023 | 0.901 | -0.02     | (-0.06, 0.03) |               |
| D69971  | MESFP1  | 02  | 0101 | 0.02                        | 0.169 | 0.02  | 0.01   | 0.04     | 0.492   | 1.58E-11 | -0.029 | 0.231           | 0.33  | -0.03    | 0.09       | 0.003         | 0.294 | 0.014    | 0.024      | 0.541    | -0.01  | 0.05  | 0.03 | 0.016 | 0.023 | 0.901 | -0.02     | (-0.06, 0.03) |               |
| P29475  | NSG1    | 02  | 0101 | 0.01                        | 0.171 | 0.02  | 0.01   | 0.04     | 0.506   | 0.052    | -0.001 | 0.224           | 0.966 | -1.01e   | -0.03      | 0.05          | 0.001 | 0.418    | -0.018     | 0.021    | 0.443  | -0.02 | 0.03 | 0.03  | 0.006 | 0.025 | 0.804     | -0.01         | (0.01, 0.04)  |
| I01419  | MORC3   | 02  | 0101 | 0.02                        | 0.171 | 0.02  | 0.01   | 0.04     | 0.506   | 0.052    | -0.001 | 0.224           | 0.966 | -1.01e   | -0.03      | 0.05          | 0.001 | 0.418    | -0.018     | 0.021    | 0.443  | -0.02 | 0.03 | 0.03  | 0.006 | 0.025 | 0.804     | -0.01         | (0.01, 0.04)  |
| DT2941  | RABEP1  | 02  | 0101 | 0.02                        | 0.171 | 0.02  | 0.01   | 0.04     | 0.506   | 0.052    | -0.001 | 0.224           | 0.966 | -1.01e   | -0.03      | 0.05          | 0.001 | 0.418    | -0.018     | 0.021    | 0.443  | -0.02 | 0.03 | 0.03  | 0.006 | 0.025 | 0.804     | -0.01         | (0.01, 0.04)  |
| P31764  | STO2    | 02  | 0101 | 0.02                        | 0.171 | 0.02  | 0.01   | 0.04     | 0.506   | 0.052    | -0.001 | 0.224           | 0.966 | -1.01e   | -0.03      | 0.05          | 0.001 | 0.418    | -0.018     | 0.021    | 0.443  | -0.02 | 0.03 | 0.03  | 0.006 | 0.025 | 0.804     | -0.01         | (0.01, 0.04)  |
| I12428  | TRM2    | 02  | 0101 | 0.02                        | 0.171 | 0.02  | 0.01   | 0.04     | 0.506   | 0.052    | -0.001 | 0.224           | 0.966 | -1.01e   | -0.03      | 0.05          | 0.001 | 0.418    | -0.018     | 0.021    | 0.443  | -0.02 | 0.03 | 0.03  | 0.006 | 0.025 | 0.804     | -0.01         | (0.01, 0.04)  |
| P31721  | ACSL1   | 02  | 0101 | 0.02                        | 0.171 | 0.02  | 0.01   | 0.04     | 0.506   | 0.052    | -0.001 | 0.224           | 0.966 | -1.01e   | -0.03      | 0.05          | 0.001 | 0.418    | -0.018     | 0.021    | 0.443  | -0.02 | 0.03 | 0.03  | 0.006 | 0.025 | 0.804     | -0.01         | (0.01, 0.04)  |
| D69628  | PKP1    | 02  | 0101 | 0.02                        | 0.171 | 0.02  | 0.01   | 0.04     | 0.506   | 0.052    | -0.001 | 0.224           | 0.966 | -1.01e   | -0.03      | 0.05          | 0.001 | 0.418    |            |          |        |       |      |       |       |       |           |               |               |





Table S4. Association of type 2 diabetes with UKB-PPP plasma protein.

| UnProt  | Gene      | OD       | Inverse variance (log2, log2) |      |       |        | MR Egger     |              |       |        | Weighted median |             |           |              | Weighted mode |           |             |              |              |              |            |              |              |              |              |
|---------|-----------|----------|-------------------------------|------|-------|--------|--------------|--------------|-------|--------|-----------------|-------------|-----------|--------------|---------------|-----------|-------------|--------------|--------------|--------------|------------|--------------|--------------|--------------|--------------|
|         |           |          | nsp                           | b/w  | se/w  | pval/w | CI/w         | FDR/w        | CI/w  | bagger | se/bagger       | pval/bagger | CI/bagger | egger        | bagger        | se/bagger | pval/bagger | CI/bagger    | bmode        | se/bmode     | pval/bmode | CI/bmode     |              |              |              |
| 072324  | LYSMD3    | OC039650 | 192                           | 0.10 | 0.13  | 0.388  | 0.01         | (0.01, 0.04) | 0.737 | 0.029  | 0.118           | 0.028       | 0.742     | 0.022        | (0.03, 0.07)  | 0.023     | 0.25        | 0.345        | 0.022        | (0.03, 0.07) | 0.023      | 0.25         | 0.345        | 0.022        | (0.03, 0.07) |
| P12872  | MLN       | OC039650 | 192                           | 0.10 | 0.13  | 0.388  | 0.01         | (0.01, 0.04) | 0.737 | 0.029  | 0.118           | 0.028       | 0.742     | 0.022        | (0.03, 0.07)  | 0.023     | 0.25        | 0.345        | 0.022        | (0.03, 0.07) | 0.023      | 0.25         | 0.345        | 0.022        | (0.03, 0.07) |
| 08NFF7  | UCD1030   | OC039650 | 192                           | 0.10 | 0.13  | 0.388  | 0.01         | (0.01, 0.04) | 0.737 | 0.029  | 0.118           | 0.028       | 0.742     | 0.022        | (0.03, 0.07)  | 0.023     | 0.25        | 0.345        | 0.022        | (0.03, 0.07) | 0.023      | 0.25         | 0.345        | 0.022        | (0.03, 0.07) |
| 06ZP24  | PTHD1     | OC031216 | 192                           | 0.10 | 0.12  | 0.385  | 0.01         | (0.01, 0.04) | 0.737 | 0.028  | 0.118           | 0.028       | 0.742     | 0.022        | (0.03, 0.07)  | 0.023     | 0.25        | 0.345        | 0.022        | (0.03, 0.07) | 0.023      | 0.25         | 0.345        | 0.022        | (0.03, 0.07) |
| 06K165  | FLKDC1    | OC031216 | 192                           | 0.10 | 0.12  | 0.385  | 0.01         | (0.01, 0.04) | 0.737 | 0.028  | 0.118           | 0.028       | 0.742     | 0.022        | (0.03, 0.07)  | 0.023     | 0.25        | 0.345        | 0.022        | (0.03, 0.07) | 0.023      | 0.25         | 0.345        | 0.022        | (0.03, 0.07) |
| 017798  | SMAD2     | OC031353 | 192                           | 0.10 | 0.12  | 0.385  | 0.01         | (0.01, 0.04) | 0.737 | 0.028  | 0.118           | 0.028       | 0.742     | 0.022        | (0.03, 0.07)  | 0.023     | 0.25        | 0.345        | 0.022        | (0.03, 0.07) | 0.023      | 0.25         | 0.345        | 0.022        | (0.03, 0.07) |
| 022233  | CD33      | OC030983 | 192                           | 0.10 | 0.12  | 0.385  | 0.01         | (0.01, 0.04) | 0.737 | 0.028  | 0.118           | 0.028       | 0.742     | 0.022        | (0.03, 0.07)  | 0.023     | 0.25        | 0.345        | 0.022        | (0.03, 0.07) | 0.023      | 0.25         | 0.345        | 0.022        | (0.03, 0.07) |
| 08M120  | MRH21     | OC030891 | 192                           | 0.10 | 0.11  | 0.387  | 0.01         | (0.01, 0.03) | 0.737 | 0.027  | 0.118           | 0.028       | 0.742     | 0.022        | (0.03, 0.07)  | 0.023     | 0.25        | 0.345        | 0.022        | (0.03, 0.07) | 0.023      | 0.25         | 0.345        | 0.022        | (0.03, 0.07) |
| 09H465  | TC1D17    | OC020844 | 192                           | 0.10 | 0.11  | 0.388  | 0.01         | (0.01, 0.03) | 0.737 | 0.027  | 0.118           | 0.028       | 0.742     | 0.022        | (0.03, 0.07)  | 0.023     | 0.25        | 0.345        | 0.022        | (0.03, 0.07) | 0.023      | 0.25         | 0.345        | 0.022        | (0.03, 0.07) |
| P09851  | TON1      | OC020847 | 192                           | 0.10 | 0.11  | 0.388  | 0.01         | (0.01, 0.03) | 0.737 | 0.027  | 0.118           | 0.028       | 0.742     | 0.022        | (0.03, 0.07)  | 0.023     | 0.25        | 0.345        | 0.022        | (0.03, 0.07) | 0.023      | 0.25         | 0.345        | 0.022        | (0.03, 0.07) |
| 043597  | SPRY2     | OC020475 | 192                           | 0.10 | 0.12  | 0.388  | 0.01         | (0.01, 0.04) | 0.738 | 0.030  | 0.119           | 0.028       | 0.742     | 0.022        | (0.03, 0.07)  | 0.023     | 0.25        | 0.345        | 0.022        | (0.03, 0.07) | 0.023      | 0.25         | 0.345        | 0.022        | (0.03, 0.07) |
| 06ZVL6  | KIAA1549L | OC031312 | 192                           | 0.10 | 0.12  | 0.389  | 0.01         | (0.01, 0.03) | 0.738 | 0.031  | 0.120           | 0.028       | 0.742     | 0.022        | (0.03, 0.07)  | 0.023     | 0.25        | 0.345        | 0.022        | (0.03, 0.07) | 0.023      | 0.25         | 0.345        | 0.022        | (0.03, 0.07) |
| 06ZLJL  | PKRAB1    | OC020887 | 192                           | 0.10 | 0.12  | 0.389  | 0.01         | (0.01, 0.03) | 0.738 | 0.031  | 0.120           | 0.028       | 0.742     | 0.022        | (0.03, 0.07)  | 0.023     | 0.25        | 0.345        | 0.022        | (0.03, 0.07) | 0.023      | 0.25         | 0.345        | 0.022        | (0.03, 0.07) |
| 042768  | WAS       | OC031279 | 192                           | 0.10 | 0.11  | 0.389  | 0.01         | (0.01, 0.04) | 0.738 | 0.030  | 0.120           | 0.028       | 0.742     | 0.022        | (0.03, 0.07)  | 0.023     | 0.25        | 0.345        | 0.022        | (0.03, 0.07) | 0.023      | 0.25         | 0.345        | 0.022        | (0.03, 0.07) |
| 014552  | CASQ2     | OC030983 | 192                           | 0.10 | 0.12  | 0.390  | 0.01         | (0.01, 0.03) | 0.739 | 0.031  | 0.120           | 0.028       | 0.742     | 0.022        | (0.03, 0.07)  | 0.023     | 0.25        | 0.345        | 0.022        | (0.03, 0.07) | 0.023      | 0.25         | 0.345        | 0.022        | (0.03, 0.07) |
| 06UMF0  | ICAM5     | OC021045 | 192                           | 0.10 | 0.12  | 0.390  | 0.01         | (0.01, 0.03) | 0.739 | 0.031  | 0.120           | 0.028       | 0.742     | 0.022        | (0.03, 0.07)  | 0.023     | 0.25        | 0.345        | 0.022        | (0.03, 0.07) | 0.023      | 0.25         | 0.345        | 0.022        | (0.03, 0.07) |
| 014349  | BIRC4     | OC021217 | 192                           | 0.10 | 0.11  | 0.390  | 0.01         | (0.01, 0.04) | 0.739 | 0.031  | 0.120           | 0.028       | 0.742     | 0.022        | (0.03, 0.07)  | 0.023     | 0.25        | 0.345        | 0.022        | (0.03, 0.07) | 0.023      | 0.25         | 0.345        | 0.022        | (0.03, 0.07) |
| P44109  | CRKL      | OC020350 | 192                           | 0.10 | 0.12  | 0.391  | 0.01         | (0.01, 0.04) | 0.739 | 0.030  | 0.120           | 0.028       | 0.742     | 0.022        | (0.03, 0.07)  | 0.023     | 0.25        | 0.345        | 0.022        | (0.03, 0.07) | 0.023      | 0.25         | 0.345        | 0.022        | (0.03, 0.07) |
| 014344  | ADAM10    | OC021045 | 192                           | 0.10 | 0.11  | 0.394  | 0.01         | (0.01, 0.03) | 0.740 | 0.030  | 0.121           | 0.028       | 0.742     | 0.022        | (0.03, 0.07)  | 0.023     | 0.25        | 0.345        | 0.022        | (0.03, 0.07) | 0.023      | 0.25         | 0.345        | 0.022        | (0.03, 0.07) |
| P17151  | AKT2      | OC031652 | 89                            | 0.10 | 0.19  | 0.392  | 0.02         | (0.05, 0.02) | 0.740 | 0.033  | 0.120           | 0.032       | 0.899     | 0.011        | (0.06, 0.07)  | 0.022     | 0.367       | 0.011        | (0.06, 0.07) | 0.022        | 0.367      | 0.011        | (0.06, 0.07) |              |              |
| 007507  | DPT       | OC020276 | 192                           | 0.10 | 0.12  | 0.396  | 0.01         | (0.02, 0.03) | 0.740 | 0.033  | 0.120           | 0.032       | 0.899     | 0.011        | (0.06, 0.07)  | 0.022     | 0.367       | 0.011        | (0.06, 0.07) | 0.022        | 0.367      | 0.011        | (0.06, 0.07) |              |              |
| PS1452  | DUSP3     | OC020827 | 192                           | 0.10 | 0.12  | 0.394  | 0.01         | (0.04, 0.02) | 0.740 | 0.034  | 0.120           | 0.032       | 0.899     | 0.011        | (0.06, 0.07)  | 0.022     | 0.367       | 0.011        | (0.06, 0.07) | 0.022        | 0.367      | 0.011        | (0.06, 0.07) |              |              |
| 09F2K7  | OC030533  | 192      | 0.10                          | 0.12 | 0.394 | 0.01   | (0.04, 0.02) | 0.740        | 0.034 | 0.120  | 0.032           | 0.899       | 0.011     | (0.06, 0.07) | 0.022         | 0.367     | 0.011       | (0.06, 0.07) | 0.022        | 0.367        | 0.011      | (0.06, 0.07) |              |              |              |
| 06ZLJL  | FNL2      | OC030719 | 192                           | 0.10 | 0.12  | 0.395  | 0.01         | (0.02, 0.04) | 0.740 | 0.036  | 0.122           | 0.032       | 0.899     | 0.011        | (0.06, 0.07)  | 0.022     | 0.367       | 0.011        | (0.06, 0.07) | 0.022        | 0.367      | 0.011        | (0.06, 0.07) |              |              |
| P09859  | OC020455  | 192      | 0.10                          | 0.12 | 0.392 | 0.01   | (0.03, 0.01) | 0.740        | 0.036 | 0.122  | 0.032           | 0.899       | 0.011     | (0.06, 0.07) | 0.022         | 0.367     | 0.011       | (0.06, 0.07) | 0.022        | 0.367        | 0.011      | (0.06, 0.07) |              |              |              |
| P09859  | OC020455  | 192      | 0.10                          | 0.12 | 0.392 | 0.01   | (0.03, 0.01) | 0.740        | 0.036 | 0.122  | 0.032           | 0.899       | 0.011     | (0.06, 0.07) | 0.022         | 0.367     | 0.011       | (0.06, 0.07) | 0.022        | 0.367        | 0.011      | (0.06, 0.07) |              |              |              |
| 09E882  | KALL1     | OC021339 | 192                           | 0.10 | 0.12  | 0.394  | 0.01         | (0.04, 0.02) | 0.740 | 0.036  | 0.122           | 0.032       | 0.899     | 0.011        | (0.06, 0.07)  | 0.022     | 0.367       | 0.011        | (0.06, 0.07) | 0.022        | 0.367      | 0.011        | (0.06, 0.07) |              |              |
| P09851  | NFC       | OC030888 | 192                           | 0.10 | 0.12  | 0.394  | 0.01         | (0.01, 0.03) | 0.740 | 0.036  | 0.122           | 0.032       | 0.899     | 0.011        | (0.06, 0.07)  | 0.022     | 0.367       | 0.011        | (0.06, 0.07) | 0.022        | 0.367      | 0.011        | (0.06, 0.07) |              |              |
| P01198  | PHF21     | OC030888 | 192                           | 0.10 | 0.12  | 0.394  | 0.01         | (0.01, 0.03) | 0.740 | 0.036  | 0.122           | 0.032       | 0.899     | 0.011        | (0.06, 0.07)  | 0.022     | 0.367       | 0.011        | (0.06, 0.07) | 0.022        | 0.367      | 0.011        | (0.06, 0.07) |              |              |
| 015113  | PCCOLCE   | OC020384 | 192                           | 0.10 | 0.12  | 0.396  | 0.02         | (0.08, 0.02) | 0.740 | 0.031  | 0.124           | 0.032       | 0.899     | 0.011        | (0.06, 0.07)  | 0.022     | 0.367       | 0.011        | (0.06, 0.07) | 0.022        | 0.367      | 0.011        | (0.06, 0.07) |              |              |
| 071587  | NACTR2    | OC030533 | 192                           | 0.10 | 0.12  | 0.396  | 0.01         | (0.04, 0.02) | 0.740 | 0.033  | 0.124           | 0.032       | 0.899     | 0.011        | (0.06, 0.07)  | 0.022     | 0.367       | 0.011        | (0.06, 0.07) | 0.022        | 0.367      | 0.011        | (0.06, 0.07) |              |              |
| 075711  | OC030533  | 192      | 0.10                          | 0.12 | 0.395 | 0.01   | (0.03, 0.01) | 0.740        | 0.033 | 0.124  | 0.032           | 0.899       | 0.011     | (0.06, 0.07) | 0.022         | 0.367     | 0.011       | (0.06, 0.07) | 0.022        | 0.367        | 0.011      | (0.06, 0.07) |              |              |              |
| 012765  | SCRN1     | OC020542 | 192                           | 0.10 | 0.12  | 0.396  | 0.01         | (0.03, 0.01) | 0.740 | 0.033  | 0.124           | 0.032       | 0.899     | 0.011        | (0.06, 0.07)  | 0.022     | 0.367       | 0.011        | (0.06, 0.07) | 0.022        | 0.367      | 0.011        | (0.06, 0.07) |              |              |
| 027096  | SPRSD2    | OC030533 | 192                           | 0.10 | 0.12  | 0.396  | 0.01         | (0.03, 0.01) | 0.740 | 0.033  | 0.124           | 0.032       | 0.899     | 0.011        | (0.06, 0.07)  | 0.022     | 0.367       | 0.011        | (0.06, 0.07) | 0.022        | 0.367      | 0.011        | (0.06, 0.07) |              |              |
| PS5022  | TL3       | OC030624 | 192                           | 0.10 | 0.12  | 0.395  | 0.01         | (0.01, 0.03) | 0.740 | 0.033  | 0.124           | 0.032       | 0.899     | 0.011        | (0.06, 0.07)  | 0.022     | 0.367       | 0.011        | (0.06, 0.07) | 0.022        | 0.367      | 0.011        | (0.06, 0.07) |              |              |
| 09F184S | STC3      | OC021285 | 192                           | 0.10 | 0.12  | 0.393  | 0.01         | (0.04, 0.02) | 0.740 | 0.034  | 0.124           | 0.032       | 0.899     | 0.011        | (0.06, 0.07)  | 0.022     | 0.367       | 0.011        | (0.06, 0.07) | 0.022        | 0.367      | 0.011        | (0.06, 0.07) |              |              |
| 09F426  | TRCB      | OC030533 | 192                           | 0.10 | 0.12  | 0.393  | 0.01         | (0.04, 0.02) | 0.740 | 0.034  | 0.124           | 0.032       | 0.899     | 0.011        | (0.06, 0.07)  | 0.022     | 0.367       | 0.011        | (0.06, 0.07) | 0.022        | 0.367      | 0.011        | (0.06, 0.07) |              |              |
| PS5288  | THOP1     | OC021034 | 18                            | 0.10 | 0.22  | 0.396  | 0.02         | (0.03, 0.06) | 0.740 | 0.191  | 0.062           | 0.035       | 0.993     | 0.06         | (0.01, 0.13)  | 0.05      | 1.04        | 0.043        | (0.06, 0.01) | 0.049        | 0.28       | 0.145        | 0.04         | (0.01, 0.10) |              |
| 09F426  | TRCB      | OC030533 | 192                           | 0.10 | 0.12  | 0.393  | 0.01         | (0.04, 0.02) | 0.740 | 0.034  | 0.124           | 0.032       | 0.899     | 0.011        | (0.06, 0.07)  | 0.022     | 0.367       | 0.011        | (0.06, 0.07) | 0.022        | 0.367      | 0.011        | (0.06, 0.07) |              |              |
| P12931  | SCR1      | OC021521 | 192                           | 0.10 | 0.11  | 0.397  | 0.01         | (0.04, 0.01) | 0.741 | 0.030  | 0.118           | 0.028       | 0.847     | 0.022        | (0.03, 0.07)  | 0.023     | 0.25        | 0.345        | 0.022        | (0.03, 0.07) | 0.023      | 0.25         | 0.345        | 0.022        | (0.03, 0.07) |
| P04216  | CHST1     | OC021050 | 192                           | 0.10 | 0.12  | 0.397  | 0.01         | (0.02, 0.04) | 0.741 | 0.030  | 0.118           | 0.028       | 0.847     | 0.022        | (0.03, 0.07)  | 0.023     | 0.25        | 0.345        | 0.022        | (0.03, 0.07) | 0.023      | 0.25         | 0.345        | 0.022        | (0.03, 0.07) |
| 09F426  | TRCB      | OC030533 | 192                           | 0.10 | 0.12  | 0.393  | 0.01         | (0.04, 0.02) | 0.740 | 0.034  | 0.124           | 0.032       | 0.899     | 0.011        | (0.06, 0.07)  | 0.022     | 0.367       | 0.011        | (0.06, 0.07) | 0.022        | 0.367      | 0.011        | (0.06, 0.07) |              |              |
| 09F426  | TRCB      | OC030533 | 192                           | 0.10 | 0.12  | 0.393  | 0.01         | (0.04, 0.02) | 0.740 | 0.034  | 0.124           | 0.032       | 0.899     | 0.011        | (0.06, 0.07)  | 0.022     | 0.367       | 0.011        | (0.06, 0.07) | 0.022        | 0.367      | 0.011        | (0.06, 0.07) |              |              |
| 09F426  | TRCB      | OC030533 | 192                           | 0.10 | 0.12  | 0.393  | 0.01         | (0.04, 0.02) | 0.740 | 0.034  | 0.124           | 0.032       | 0.899     | 0.011        | (0.06, 0.07)  | 0.022     | 0.367       | 0.011        | (0.06, 0.07) | 0.022        | 0.367      | 0.011        | (0.06, 0.07) |              |              |
| 09F426  | TRCB      | OC030533 | 192                           | 0.10 | 0.12  | 0.393  | 0.01         | (0.04, 0.02) | 0.740 | 0.034  | 0.124           | 0.032       | 0.899     | 0.011        | (0.06, 0.07)  | 0.022     | 0.367       | 0.011        | (0.06, 0.07) | 0.           |            |              |              |              |              |

Table S4. Association of type 2 diabetes with UKB-PPP plasma protein.

| UnProt | Gene     | OD      | nsnp | Inverse variance co-ordinates |        |           |                    | MR Egger |          |         |        | Weighted median |         |                  |            | Weighted mode |        |       |           |              |              |         |       |        |               |                  |              |
|--------|----------|---------|------|-------------------------------|--------|-----------|--------------------|----------|----------|---------|--------|-----------------|---------|------------------|------------|---------------|--------|-------|-----------|--------------|--------------|---------|-------|--------|---------------|------------------|--------------|
|        |          |         |      | b_low                         | se_low | p_val_low | CI_low             | FDR_low  | Q_val    | loggger | segger | pvalgger        | CIegger | egger            | beta_egger | se_val        | p_val  | beta  | se_mode   | p_val        | beta         | se_mode | p_val |        |               |                  |              |
| U14843 | ITPR1    | OD30216 | 192  | -0.010                        | 0.014  | 0.465     | -0.01 (0.04, 0.02) | 0.789    | 8.12E-05 | 0.024   | 0.028  | 0.933           | -0.022  | (-0.08, 0.03)    | 0.001      | 0.576         | 0.002  | 0.026 | 0.934     | 2.15e-03     | (0.05, 0.05) | 0.002   | 0.25  | 0.933  | 2.15e-03      | (0.05, 0.05)     |              |
| D28445 | LEI8E4   | OD20928 | 192  | -0.008                        | 0.015  | 0.481     | 0.01 (0.02, 0.04)  | 0.789    | 2.27E-05 | 0.007   | 0.006  | 0.917           | 0.017   | (0.01, 0.02)     | 0.001      | 0.620         | 0.002  | 0.024 | 0.744     | 0.03         | (0.04, 0.03) | 0.001   | 0.015 | 0.917  | 0.017         | (0.01, 0.02)     |              |
| D93639 | NPTN     | OD21235 | 192  | -0.009                        | 0.012  | 0.465     | -0.01 (0.03, 0.01) | 0.789    | 6.17E-09 | 0.024   | 0.029  | 0.933           | -0.022  | (-0.08, 0.03)    | 0.002      | 0.627         | -0.035 | 0.021 | 0.101     | -0.04        | (0.08, 0.01) | 0.003   | 0.038 | 0.933  | -0.022        | (-0.08, 0.03)    |              |
| P20774 | DN       | OD21123 | 192  | -0.009                        | 0.013  | 0.464     | -0.01 (0.02, 0.03) | 0.789    | 6.28E-09 | 0.025   | 0.017  | 0.922           | -0.022  | (-0.08, 0.03)    | 0.003      | 0.622         | -0.040 | 0.017 | 0.117     | -0.036       | (0.04, 0.03) | 0.003   | 0.024 | 0.922  | -0.022        | (-0.08, 0.03)    |              |
| P11286 | PPY      | OD21123 | 192  | -0.009                        | 0.013  | 0.464     | -0.01 (0.02, 0.03) | 0.789    | 6.28E-09 | 0.025   | 0.017  | 0.922           | -0.022  | (-0.08, 0.03)    | 0.003      | 0.622         | -0.040 | 0.017 | 0.117     | -0.036       | (0.04, 0.03) | 0.003   | 0.024 | 0.922  | -0.022        | (-0.08, 0.03)    |              |
| D06689 | RAD51    | OD21254 | 192  | -0.009                        | 0.012  | 0.465     | -0.01 (0.02, 0.03) | 0.789    | 5.21E-05 | 0.023   | 0.025  | 0.933           | -0.022  | (-0.08, 0.03)    | 0.001      | 0.574         | 0.007  | 0.024 | 0.707     | 0.01         | (0.04, 0.05) | 0.006   | 0.023 | 0.933  | -0.022        | (-0.08, 0.03)    |              |
| U15043 | STK4     | OD21254 | 192  | -0.009                        | 0.012  | 0.465     | -0.01 (0.02, 0.03) | 0.789    | 5.21E-05 | 0.023   | 0.025  | 0.933           | -0.022  | (-0.08, 0.03)    | 0.001      | 0.574         | 0.007  | 0.024 | 0.707     | 0.01         | (0.04, 0.05) | 0.006   | 0.023 | 0.933  | -0.022        | (-0.08, 0.03)    |              |
| Q6UX82 | CXCL12   | OD21252 | 192  | 0.010                         | 0.013  | 0.467     | 0.01 (0.02, 0.04)  | 0.791    | 1.28E-07 | 0.013   | 0.026  | 0.906           | 0.010   | (0.01, 0.04)     | 0.006      | 0.868         | 0.016  | 0.022 | 0.459     | 0.02         | (0.03, 0.06) | 0.010   | 0.024 | 0.906  | 0.010         | (0.01, 0.04)     |              |
| D93703 | MRFSP5   | OD21268 | 192  | -0.009                        | 0.012  | 0.467     | -0.01 (0.01, 0.03) | 0.791    | 0.85E-06 | 0.006   | 0.023  | 0.901           | -0.011  | (-0.05, 0.04)    | 0.001      | 0.485         | -0.013 | 0.024 | 0.589     | -0.01        | (0.06, 0.03) | -0.013  | 0.024 | 0.901  | -0.011        | (-0.05, 0.04)    |              |
| P78560 | CRADD    | OD21268 | 192  | -0.009                        | 0.012  | 0.467     | -0.01 (0.01, 0.03) | 0.791    | 0.85E-06 | 0.006   | 0.023  | 0.901           | -0.011  | (-0.05, 0.04)    | 0.001      | 0.485         | -0.013 | 0.024 | 0.589     | -0.01        | (0.06, 0.03) | -0.013  | 0.024 | 0.901  | -0.011        | (-0.05, 0.04)    |              |
| D06705 | HMOX2    | OD21268 | 192  | -0.010                        | 0.014  | 0.468     | -0.01 (0.04, 0.02) | 0.791    | 2.75E-06 | 0.006   | 0.026  | 0.819           | -0.011  | (-0.05, 0.06)    | 0.001      | 0.485         | -0.013 | 0.023 | 0.938     | -0.01        | (0.04, 0.05) | 0.007   | 0.024 | 0.819  | -0.011        | (-0.05, 0.06)    |              |
| P12270 | TRIP1    | OD30143 | 128  | 0.010                         | 0.014  | 0.468     | 0.01 (0.02, 0.04)  | 0.791    | 0.39E-03 | 0.026   | 0.221  | -0.031          | 0.028   | (-0.07, 0.03)    | 0.003      | 0.059         | 0.000  | 0.026 | 0.988     | 1.16e-04     | (0.04, 0.05) | -0.016  | 0.025 | 0.026  | 0.988         | 1.16e-04         | (0.04, 0.05) |
| D26884 | CEP43    | OD21268 | 192  | -0.009                        | 0.012  | 0.467     | -0.01 (0.02, 0.04) | 0.791    | 0.39E-03 | 0.026   | 0.221  | -0.031          | 0.028   | (-0.07, 0.03)    | 0.003      | 0.059         | 0.000  | 0.026 | 0.988     | 1.16e-04     | (0.04, 0.05) | -0.016  | 0.025 | 0.026  | 0.988         | 1.16e-04         | (0.04, 0.05) |
| P34813 | EPHK2    | OD20219 | 192  | 0.010                         | 0.014  | 0.469     | 0.01 (0.02, 0.04)  | 0.792    | 2.81E-04 | 0.018   | 0.027  | 0.912           | 0.012   | (0.02, 0.04)     | 0.002      | 0.230         | 0.011  | 0.028 | 0.679     | 0.01         | (0.04, 0.06) | 0.001   | 0.027 | 0.912  | 0.012         | (0.02, 0.04)     |              |
| P10209 | PRKAC3   | OD20221 | 192  | 0.010                         | 0.014  | 0.469     | 0.01 (0.01, 0.03)  | 0.792    | 0.86E-05 | 0.023   | 0.027  | 0.933           | 0.012   | (0.01, 0.04)     | 0.002      | 0.230         | 0.011  | 0.028 | 0.679     | 0.01         | (0.04, 0.06) | 0.001   | 0.027 | 0.933  | 0.012         | (0.02, 0.04)     |              |
| Q8BU17 | SERPINA1 | OD20221 | 192  | -0.008                        | 0.011  | 0.470     | -0.01 (0.03, 0.01) | 0.792    | 3.61E-08 | 0.038   | 0.022  | 0.906           | -0.014  | (-0.08, 0.03)    | 0.001      | 0.015         | -0.019 | 0.018 | 0.298     | -0.02        | (0.02, 0.05) | 0.020   | 0.021 | 0.906  | -0.014        | (-0.08, 0.03)    |              |
| P01588 | EGP      | OD20222 | 192  | 0.010                         | 0.014  | 0.471     | 0.01 (0.02, 0.04)  | 0.793    | 0.00E+00 | 0.048   | 0.026  | 0.808           | 0.005   | (0.01, 0.035-03) | 0.004      | 0.011         | -0.032 | 0.020 | 0.102     | -0.03        | (0.07, 0.01) | 0.030   | 0.024 | 0.808  | 0.005         | (0.01, 0.035-03) |              |
| D05966 | TRNFRS14 | OD20222 | 192  | 0.010                         | 0.014  | 0.471     | 0.01 (0.02, 0.04)  | 0.793    | 0.00E+00 | 0.048   | 0.026  | 0.808           | 0.005   | (0.01, 0.035-03) | 0.004      | 0.011         | -0.032 | 0.020 | 0.102     | -0.03        | (0.07, 0.01) | 0.030   | 0.024 | 0.808  | 0.005         | (0.01, 0.035-03) |              |
| P22748 | CD4      | OD20241 | 87   | -0.015                        | 0.021  | 0.472     | -0.02 (0.06, 0.03) | 0.793    | 3.52E-05 | 0.019   | 0.036  | 0.922           | -0.022  | (-0.08, 0.03)    | 0.002      | 0.238         | 0.001  | 0.027 | 0.934e-04 | (0.05, 0.05) | 0.007        | 0.025   | 0.922 | -0.022 | (-0.08, 0.03) |                  |              |
| P04234 | C3D      | OD20242 | 192  | -0.009                        | 0.012  | 0.475     | -0.01 (0.02, 0.03) | 0.793    | 0.37E-09 | 0.009   | 0.024  | 0.787           | -0.011  | (-0.06, 0.04)    | 0.001      | 0.401         | -0.012 | 0.024 | 0.627     | -0.01        | (0.04, 0.05) | -0.011  | 0.023 | 0.787  | -0.011        | (-0.06, 0.04)    |              |
| D02949 | CEACAM1  | OD20242 | 192  | -0.009                        | 0.012  | 0.475     | -0.01 (0.02, 0.03) | 0.793    | 0.37E-09 | 0.009   | 0.024  | 0.787           | -0.011  | (-0.06, 0.04)    | 0.001      | 0.401         | -0.012 | 0.024 | 0.627     | -0.01        | (0.04, 0.05) | -0.011  | 0.023 | 0.787  | -0.011        | (-0.06, 0.04)    |              |
| U14055 | COL9A2   | OD21255 | 192  | -0.009                        | 0.012  | 0.474     | -0.01 (0.01, 0.03) | 0.793    | 0.57E-04 | 0.026   | 0.023  | 0.925           | -0.013  | (-0.07, 0.02)    | 0.002      | 0.089         | 0.000  | 0.025 | 0.988     | 4.60e-04     | (0.05, 0.05) | 0.002   | 0.024 | 0.925  | -0.013        | (-0.07, 0.02)    |              |
| D03889 | EDF1     | OD21010 | 192  | 0.010                         | 0.014  | 0.472     | 0.01 (0.02, 0.04)  | 0.793    | 0.00E+00 | 0.029   | 0.027  | 0.725           | 0.011   | (0.06, 0.04)     | 0.001      | 0.399         | 0.009  | 0.024 | 0.767     | 0.01         | (0.04, 0.02) | 0.004   | 0.024 | 0.725  | 0.011         | (0.06, 0.04)     |              |
| D06447 | EVI5     | OD30519 | 192  | -0.009                        | 0.013  | 0.475     | -0.01 (0.04, 0.02) | 0.793    | 0.00E+00 | 0.019   | 0.026  | 0.465           | -0.022  | (-0.07, 0.03)    | 0.001      | 0.671         | -0.020 | 0.024 | 0.402     | -0.02        | (0.07, 0.02) | -0.027  | 0.024 | 0.465  | -0.022        | (-0.07, 0.03)    |              |
| P25992 | GUCY2C   | OD31318 | 192  | -0.009                        | 0.012  | 0.474     | -0.01 (0.01, 0.03) | 0.793    | 0.25E-07 | 0.027   | 0.026  | 0.933           | -0.022  | (-0.08, 0.03)    | 0.001      | 0.362         | -0.017 | 0.019 | 0.380     | -0.02        | (0.05, 0.02) | -0.025  | 0.028 | 0.933  | -0.022        | (-0.08, 0.03)    |              |
| P20702 | ITGAK    | OD31325 | 192  | -0.009                        | 0.012  | 0.475     | -0.01 (0.02, 0.04) | 0.793    | 0.00E+00 | 0.011   | 0.030  | 0.911           | -0.011  | (-0.06, 0.04)    | 0.001      | 0.359         | 0.001  | 0.020 | 0.968     | 0.04e-04     | (0.04, 0.04) | -0.008  | 0.028 | 0.911  | -0.011        | (-0.06, 0.04)    |              |
| P11137 | MAP2     | OD31318 | 192  | -0.009                        | 0.013  | 0.472     | -0.01 (0.02, 0.04) | 0.793    | 0.00E+00 | 0.007   | 0.026  | 0.780           | -0.011  | (-0.04, 0.06)    | 0.001      | 0.362         | -0.017 | 0.019 | 0.380     | -0.02        | (0.05, 0.02) | -0.025  | 0.028 | 0.780  | -0.011        | (-0.06, 0.04)    |              |
| U14986 | MESD     | OD21299 | 192  | -0.010                        | 0.013  | 0.473     | -0.01 (0.04, 0.02) | 0.793    | 0.00E+00 | 0.019   | 0.026  | 0.844           | -0.022  | (-0.07, 0.03)    | 0.001      | 0.371         | -0.010 | 0.024 | 0.677     | -0.01        | (0.04, 0.04) | -0.022  | 0.028 | 0.844  | -0.022        | (-0.07, 0.03)    |              |
| D01514 | MORF4L2  | OD21299 | 192  | -0.010                        | 0.013  | 0.473     | -0.01 (0.04, 0.02) | 0.793    | 0.00E+00 | 0.019   | 0.026  | 0.844           | -0.022  | (-0.07, 0.03)    | 0.001      | 0.371         | -0.010 | 0.024 | 0.677     | -0.01        | (0.04, 0.04) | -0.022  | 0.028 | 0.844  | -0.022        | (-0.07, 0.03)    |              |
| P02166 | NESD     | OD21299 | 192  | -0.010                        | 0.013  | 0.473     | -0.01 (0.04, 0.02) | 0.793    | 0.00E+00 | 0.019   | 0.026  | 0.844           | -0.022  | (-0.07, 0.03)    | 0.001      | 0.371         | -0.010 | 0.024 | 0.677     | -0.01        | (0.04, 0.04) | -0.022  | 0.028 | 0.844  | -0.022        | (-0.07, 0.03)    |              |
| D17674 | MOF      | OD21299 | 192  | -0.010                        | 0.013  | 0.473     | -0.01 (0.04, 0.02) | 0.793    | 0.00E+00 | 0.019   | 0.026  | 0.844           | -0.022  | (-0.07, 0.03)    | 0.001      | 0.371         | -0.010 | 0.024 | 0.677     | -0.01        | (0.04, 0.04) | -0.022  | 0.028 | 0.844  | -0.022        | (-0.07, 0.03)    |              |
| P28922 | RPTD     | OD20570 | 192  | -0.009                        | 0.013  | 0.473     | -0.01 (0.04, 0.02) | 0.793    | 0.00E+00 | 0.018   | 0.025  | 0.744           | -0.022  | (-0.07, 0.03)    | 0.002      | 0.207         | -0.020 | 0.023 | 0.401     | -0.02        | (0.03, 0.07) | -0.020  | 0.026 | 0.744  | -0.022        | (-0.07, 0.03)    |              |
| D94446 | WTKO     | OD20570 | 192  | -0.009                        | 0.013  | 0.473     | -0.01 (0.04, 0.02) | 0.793    | 0.00E+00 | 0.018   | 0.025  | 0.744           | -0.022  | (-0.07, 0.03)    | 0.002      | 0.207         | -0.020 | 0.023 | 0.401     | -0.02        | (0.03, 0.07) | -0.020  | 0.026 | 0.744  | -0.022        | (-0.07, 0.03)    |              |
| P05121 | SERPINE1 | OD21015 | 192  | -0.009                        | 0.013  | 0.472     | -0.01 (0.03, 0.02) | 0.793    | 0.00E+00 | 0.008   | 0.025  | 0.739           | -0.011  | (-0.06, 0.04)    | 0.001      | 0.366         | -0.008 | 0.023 | 0.733     | -0.01        | (0.05, 0.04) | -0.024  | 0.026 | 0.739  | -0.011        | (-0.06, 0.04)    |              |
| P18474 | TRM1     | OD20533 | 192  | -0.009                        | 0.013  | 0.474     | -0.01 (0.03, 0.02) | 0.793    | 0.01E-02 | 0.010   | 0.025  | 0.703           | -0.011  | (-0.06, 0.04)    | 0.001      | 0.366         | -0.008 | 0.023 | 0.733     | -0.01        | (0.05, 0.04) | -0.024  | 0.026 | 0.703  | -0.011        | (-0.06, 0.04)    |              |
| D06814 | ABHD14B  | OD20533 | 192  | -0.009                        | 0.013  | 0.474     | -0.01 (0.03, 0.02) | 0.793    | 0.01E-02 | 0.010   | 0.025  | 0.703           | -0.011  | (-0.06, 0.04)    | 0.001      | 0.366         | -0.008 | 0.023 | 0.733     | -0.01        | (0.05, 0.04) | -0.024  | 0.026 | 0.703  | -0.011        | (-0.06, 0.04)    |              |
| P11338 | COL1     | OD20533 | 192  | -0.009                        | 0.013  | 0.474     | -0.01 (0.03, 0.02) | 0.793    | 0.01E-02 | 0.010   | 0.025  | 0.703           | -0.011  | (-0.06, 0.04)    | 0.001      | 0.366         | -0.008 | 0.023 | 0.733     | -0.01        | (0.05, 0.04) | -0.024  | 0.026 | 0.703  | -0.011        | (-0.06, 0.04)    |              |
| U13388 | TOM2D    | OD30353 | 192  | -0.010                        | 0.014  | 0.478     | -0.01 (0.02, 0.04) | 0.795    | 2.38E-05 | 0.019   | 0.028  | 0.884           | -0.022  | (-0.07, 0.03)    | 0.002      | 0.214         | -0.005 | 0.025 | 0.932     | 0.01         | (0.04, 0.04) | 0.000   | 0.025 | 0.884  | -0.022        | (-0.07, 0.03)    |              |
| D07700 | OTC      | OD20242 | 192  | -0.009                        | 0.012  | 0.478     | -0.01 (0.02, 0.04) | 0.795    | 0.00E+00 | 0.019   | 0.028  | 0.884           | -0.022  | (-0.07, 0.03)    | 0.002      | 0.214         | -0.005 | 0.025 | 0.932     | 0.01         | (0.04, 0.04) | 0.000   | 0.025 | 0.884  | -0.022        | (-0.07, 0.03)    |              |
| P02848 | ACE      | OD30727 | 192  | 0.010                         | 0.014  | 0.479     | 0.01 (0.09, 0.19)  | 0.796    | 0.00E+00 | 0.037   | 0.136  | 0.787           | 0.014   | (0.23, 0.30)     | 0.001      | 0.913         | -0.002 | 0.019 | 0.908     | -0.22        | (0.04, 0.04) | 0.014   |       |        |               |                  |              |

Table S4. Association of type 2 diabetes with UKB-PPP plasma protein.

| UnPrFid | Gene     | OD      | nsnp | Inverse variance co-kriging |      |       |        | MR Egger     |         |          |        | Weighted median |        |          |                    | Weighted mode |       |        |         |       |               |                    |               |               |         |              |                    |               |               |
|---------|----------|---------|------|-----------------------------|------|-------|--------|--------------|---------|----------|--------|-----------------|--------|----------|--------------------|---------------|-------|--------|---------|-------|---------------|--------------------|---------------|---------------|---------|--------------|--------------------|---------------|---------------|
|         |          |         |      | beta                        | se   | pval  | CI_low | CI_high      | FDR_low | beta     | se     | pval            | CI_low | CI_high  | beta               | se            | pval  | CI_low | CI_high | beta  | se            | pval               | CI_low        | CI_high       |         |              |                    |               |               |
| 09UNNS  | PROCR    | 0301349 | 48   | -0.12                       | 0.22 | 0.543 | -0.01  | (0.5, 0.03)  | 0.832   | 0.618    | 0.34   | 0.30            | 0.289  | 0.03     | (-0.09, 0.03)      | 0.002         | 0.345 | -0.025 | 0.288   | 0.33  | 0.02          | (-0.06, 0.03)      | -0.027        | 0.272         | 0.312   | -0.03        | (-0.06, 0.03)      |               |               |
| 09TE4S  | DT11     | 0203069 | 192  | -0.08                       | 0.13 | 0.546 | -0.01  | (0.02, 0.02) | 0.832   | 0.106    | 0.06   | 0.028           | 0.134  | 0.006    | (-0.01, 0.01)      | 0.002         | 0.927 | 0.014  | 0.022   | 0.883 | 0.12          | 0.01               | (-0.01, 0.03) | -0.012        | 0.283   | 0.431        | -0.01              | (-0.06, 0.03) |               |
| 013451  | KPFR5    | 0200937 | 192  | -0.08                       | 0.13 | 0.545 | -0.01  | (0.03, 0.02) | 0.832   | 0.201    | -0.003 | 0.225           | 0.884  | -0.336   | 0.05               | (0.05, 0.05)  | 0.000 | 0.835  | 0.006   | 0.025 | 0.812         | 0.01               | (-0.06, 0.04) | -0.020        | 0.236   | 0.438        | -0.02              | (-0.07, 0.03) |               |
| 026445  | MKBP     | 0203028 | 192  | -0.08                       | 0.13 | 0.548 | -0.01  | (0.03, 0.02) | 0.832   | 0.016    | -0.043 | 0.226           | 1.100  | -0.04    | (0.09, 0.01)       | 0.002         | 1.120 | -0.037 | 0.024   | 1.121 | -0.04         | (-0.08, 0.01)      | -0.036        | 0.225         | 0.553   | -0.04        | (-0.09, 0.01)      |               |               |
| 054117  | KXPH1    | 0200449 | 192  | -0.08                       | 0.13 | 0.546 | -0.01  | (0.03, 0.02) | 0.832   | 0.028    | 0.028  | 0.228           | 0.028  | 0.028    | (0.02, 0.02)       | 0.000         | 0.927 | 0.014  | 0.022   | 0.883 | 0.12          | 0.01               | (-0.01, 0.03) | -0.012        | 0.283   | 0.431        | -0.01              | (-0.06, 0.03) |               |
| 013976  | PRKG1    | 0203062 | 192  | -0.08                       | 0.13 | 0.545 | -0.01  | (0.03, 0.02) | 0.832   | 0.006    | -0.020 | 0.228           | 0.442  | 0.02     | (0.03, 0.07)       | 0.001         | 0.993 | 0.017  | 0.024   | 0.979 | 0.02          | 0.02               | (-0.06, 0.03) | -0.038        | 0.233   | 0.106        | -0.04              | (-0.08, 0.01) |               |
| 025245  | RC14     | 0203096 | 192  | -0.08                       | 0.13 | 0.550 | -0.02  | (0.04, 0.07) | 0.832   | 3.165    | 1.12   | 0.864           | 0.55   | 0.28     | 0.04               | (0.14, 0.16)  | 0.003 | 0.268  | 0.040   | 0.024 | 0.998         | 0.04               | 0.01          | (-0.02, 0.06) | 0.037   | 0.220        | 0.434              | 0.04          | (-0.06, 0.03) |
| 026111  | SFTPA2   | 0201218 | 192  | -0.08                       | 0.13 | 0.544 | -0.01  | (0.02, 0.03) | 0.832   | 2.01E-04 | 0.918  | 0.225           | 0.483  | 0.02     | (0.03, 0.07)       | 0.001         | 0.644 | 0.037  | 0.017   | 0.032 | 0.04          | (0.15e-03, 0.07)   | 0.046         | 0.254         | 0.051   | 0.05         | (0.17e-04, 0.09)   |               |               |
| 098585  | TSPAN15  | 0203095 | 192  | -0.07                       | 0.12 | 0.547 | -0.01  | (0.02, 0.03) | 0.832   | 0.144    | -0.013 | 0.225           | 0.980  | 0.01     | (-0.06, 0.04)      | 0.001         | 0.330 | -0.022 | 0.020   | 0.290 | 0.02          | (-0.06, 0.02)      | -0.037        | 0.208         | 0.179   | -0.04        | (-0.08, 0.02)      |               |               |
| 096512  | AKM2D    | 0201176 | 192  | -0.07                       | 0.12 | 0.546 | -0.01  | (0.02, 0.03) | 0.832   | 0.104    | 0.025  | 0.225           | 0.980  | 0.01     | (-0.06, 0.04)      | 0.001         | 0.330 | -0.022 | 0.020   | 0.290 | 0.02          | (-0.06, 0.02)      | -0.037        | 0.208         | 0.179   | -0.04        | (-0.08, 0.02)      |               |               |
| 015169  | AKM1     | 0120582 | 192  | -0.07                       | 0.12 | 0.547 | -0.01  | (0.02, 0.03) | 0.833   | 0.077    | 0.003  | 0.224           | 0.913  | 2.63e-03 | (0.07, 0.05)       | 0.001         | 0.864 | 0.007  | 0.020   | 0.745 | 0.01          | (0.03, 0.05)       | 0.000         | 0.025         | 0.991   | 2.85e-04     | (0.05, 0.05)       |               |               |
| 030705  | CKAP4    | 0202017 | 192  | -0.09                       | 0.15 | 0.547 | -0.01  | (0.02, 0.04) | 0.833   | 3.53E-09 | -0.055 | 0.228           | 0.949  | -0.06    | (-0.11, -0.06e-04) | 0.004         | 0.008 | -0.030 | 0.020   | 1.45  | -0.03         | (-0.07, 0.01)      | -0.017        | 0.021         | 0.416   | -0.02        | (-0.06, 0.02)      |               |               |
| 026101  | RAB2B    | 0201082 | 192  | -0.08                       | 0.13 | 0.547 | -0.01  | (0.02, 0.03) | 0.832   | 1.93E-02 | 0.022  | 0.228           | 0.811  | 0.00     | (-0.06, 0.05)      | 0.003         | 0.024 | 0.007  | 0.471   | 0.01  | 0.01          | (-0.04, 0.04)      | -0.012        | 0.023         | 0.881   | 3.4e-03      | (0.04, 0.05)       |               |               |
| 026177  | EYF7Y7   | 0203085 | 192  | -0.09                       | 0.15 | 0.548 | -0.01  | (0.03, 0.05) | 0.835   | 1.78E-28 | -0.036 | 0.228           | 0.841  | -0.01    | (-0.06, 0.04)      | 0.001         | 0.554 | -0.015 | 0.022   | 0.440 | -0.02         | (-0.06, 0.03)      | -0.009        | 0.023         | 0.685   | -0.01        | (-0.06, 0.04)      |               |               |
| 042702  | IFLN4    | 0203096 | 192  | -0.08                       | 0.13 | 0.550 | -0.02  | (0.04, 0.07) | 0.835   | 3.16E-11 | 0.864  | 0.55            | 0.28   | 0.04     | (0.14, 0.16)       | 0.003         | 0.268 | 0.040  | 0.024   | 0.998 | 0.04          | 0.01               | (-0.02, 0.06) | 0.037         | 0.220   | 0.434        | 0.04               | (-0.06, 0.03) |               |
| 020783  | NTP3     | 0202091 | 192  | -0.08                       | 0.13 | 0.551 | -0.01  | (0.02, 0.04) | 0.835   | 3.29E-04 | 0.945  | 0.027           | 0.901  | 0.05     | (0.01, 0.10)       | 0.002         | 1.106 | 0.043  | 0.020   | 0.034 | 0.04          | (0.27e-03, 0.08)   | 0.035         | 0.023         | 0.135   | 0.03         | (0.02, 0.08)       |               |               |
| 016233  | PNLP1    | 0203063 | 192  | -0.19                       | 0.31 | 0.550 | -0.02  | (0.04, 0.08) | 0.835   | 8.29E-18 | 0.074  | 0.861           | 0.225  | 0.07     | (0.05, 0.19)       | 0.003         | 0.291 | 0.034  | 0.023   | 1.42  | 0.03          | (-0.01, 0.08)      | 0.030         | 0.025         | 0.230   | 0.03         | (0.02, 0.08)       |               |               |
| 026174  | SRPN21   | 0203096 | 192  | -0.07                       | 0.12 | 0.555 | -0.01  | (0.02, 0.03) | 0.835   | 0.981    | 0.007  | 0.023           | 0.778  | 0.01     | (0.04, 0.05)       | 0.001         | 0.493 | 0.022  | 0.021   | 0.288 | 0.02          | (-0.02, 0.06)      | 0.028         | 0.028         | 0.291   | 0.03         | (0.02, 0.08)       |               |               |
| 026558  | WASF1    | 0202091 | 192  | -0.08                       | 0.13 | 0.551 | -0.01  | (0.02, 0.03) | 0.835   | 0.001    | -0.009 | 0.226           | 0.740  | -0.01    | (-0.06, 0.04)      | 0.000         | 0.978 | 0.008  | 0.023   | 0.471 | 0.01          | (0.04, 0.05)       | -0.005        | 0.023         | 0.810   | -0.01        | (-0.06, 0.04)      |               |               |
| 016971  | CD36     | 0203045 | 192  | -0.09                       | 0.15 | 0.552 | -0.01  | (0.02, 0.04) | 0.836   | 1.24E-09 | -0.008 | 0.029           | 0.790  | -0.01    | (-0.06, 0.04)      | 0.001         | 0.510 | -0.017 | 0.021   | 1.416 | -0.02         | (-0.06, 0.02)      | -0.010        | 0.023         | 0.695   | -0.01        | (-0.06, 0.04)      |               |               |
| 022511  | NTYA     | 0203014 | 192  | -0.07                       | 0.12 | 0.552 | -0.01  | (0.02, 0.03) | 0.836   | 0.407    | -0.022 | 0.023           | 0.100  | 0.04     | (0.03, 0.05)       | 0.002         | 0.944 | -0.028 | 0.022   | 0.641 | -0.02         | (-0.06, 0.02)      | -0.023        | 0.023         | 0.683   | -0.02        | (-0.06, 0.04)      |               |               |
| 026127  | NLGN1    | 0203090 | 192  | -0.07                       | 0.12 | 0.552 | -0.01  | (0.02, 0.03) | 0.836   | 0.275    | 0.014  | 0.024           | 0.552  | 0.01     | (-0.03, 0.08)      | 0.000         | 0.729 | 0.005  | 0.025   | 0.827 | 0.01          | (-0.04, 0.05)      | -0.021        | 0.024         | 0.391   | 0.02         | (0.03, 0.07)       |               |               |
| 017518  | ARHCA1   | 0202092 | 192  | -0.07                       | 0.12 | 0.553 | -0.01  | (0.02, 0.03) | 0.837   | 0.228    | -0.040 | 0.024           | 0.100  | 0.04     | (0.03, 0.05)       | 0.003         | 0.024 | 0.009  | 0.025   | 0.733 | 0.01          | (-0.04, 0.06)      | 0.003         | 0.023         | 0.681   | 3.4e-03      | (0.04, 0.05)       |               |               |
| 098960  | LTAH4    | 0201452 | 192  | -0.07                       | 0.12 | 0.554 | -0.01  | (0.02, 0.03) | 0.838   | 0.778    | -0.051 | 0.022           | 0.023  | 0.05     | (-0.10, 0.01)      | 0.003         | 0.022 | -0.016 | 0.023   | 0.493 | 0.02          | (-0.06, 0.03)      | -0.014        | 0.024         | 0.560   | -0.01        | (-0.06, 0.03)      |               |               |
| 043896  | KIFIC    | 0203163 | 192  | -0.07                       | 0.12 | 0.555 | -0.01  | (0.02, 0.03) | 0.838   | 0.258    | -0.045 | 0.023           | 0.058  | 0.04     | (0.09, -0.22e-03)  | 0.003         | 0.011 | -0.042 | 0.020   | 0.038 | 0.04          | (-0.08, -0.22e-03) | -0.047        | 0.022         | 0.033   | -0.05        | (-0.08, -0.13e-04) |               |               |
| 043378  | PTN9B    | 0203037 | 192  | -0.07                       | 0.12 | 0.555 | -0.01  | (0.02, 0.03) | 0.838   | 0.981    | 0.007  | 0.023           | 0.778  | 0.01     | (0.04, 0.05)       | 0.001         | 0.493 | 0.022  | 0.021   | 0.288 | 0.02          | (-0.02, 0.06)      | 0.028         | 0.028         | 0.291   | 0.03         | (0.02, 0.08)       |               |               |
| 012888  | TSP3BP1  | 0203040 | 192  | -0.10                       | 0.16 | 0.556 | -0.01  | (0.02, 0.04) | 0.839   | 3.39E-12 | 0.007  | 0.322           | 0.825  | 0.01     | (-0.06, 0.07)      | 0.000         | 0.924 | 0.031  | 0.024   | 0.208 | 0.03          | (-0.08, 0.02)      | -0.045        | 0.023         | 0.050   | -0.04        | (-0.08, -0.19e-04) |               |               |
| 062574  | LYPD3    | 0201230 | 192  | -0.10                       | 0.17 | 0.557 | -0.01  | (0.04, 0.02) | 0.840   | 8.39E-28 | 0.044  | 0.033           | 0.176  | 0.04     | (0.02, 0.11)       | 0.003         | 0.054 | 0.022  | 0.019   | 0.227 | 0.02          | (-0.02, 0.06)      | 0.020         | 0.022         | 0.356   | 0.02         | (0.02, 0.06)       |               |               |
| 026176  | TRAF3IP1 | 0203096 | 192  | -0.07                       | 0.12 | 0.557 | -0.01  | (0.02, 0.03) | 0.840   | 2.45E-09 | 0.029  | 0.023           | 0.285  | 0.01     | (-0.06, 0.07)      | 0.001         | 0.350 | 0.024  | 0.027   | 0.621 | 0.02          | (-0.02, 0.06)      | 0.033         | 0.023         | 0.683   | 0.02         | (0.03, 0.08)       |               |               |
| 026128  | BKIP1    | 0202094 | 192  | -0.07                       | 0.12 | 0.558 | -0.01  | (0.02, 0.03) | 0.842   | 0.400    | 0.008  | 0.024           | 0.748  | 0.01     | (-0.04, 0.06)      | 0.001         | 0.488 | 0.015  | 0.021   | 0.440 | 0.02          | (-0.03, 0.06)      | 0.005         | 0.024         | 0.847   | -0.05        | (-0.09, 0.04)      |               |               |
| 026178  | CLEC2C   | 0203096 | 192  | -0.07                       | 0.12 | 0.558 | -0.01  | (0.02, 0.03) | 0.842   | 0.022    | 0.022  | 0.024           | 0.100  | 0.04     | (0.03, 0.05)       | 0.002         | 0.027 | 0.027  | 0.471   | 0.01  | (-0.04, 0.06) | 0.003              | 0.023         | 0.681         | 3.4e-03 | (0.04, 0.05) |                    |               |               |
| 026129  | DCLD2L   | 0202044 | 192  | -0.11                       | 0.18 | 0.563 | -0.01  | (0.05, 0.03) | 0.842   | 1.31E-33 | 0.003  | 0.036           | 0.925  | 0.34e-03 | (0.07, 0.07)       | 0.001         | 0.648 | 0.021  | 0.023   | 0.348 | 0.02          | (-0.02, 0.07)      | 0.025         | 0.023         | 0.275   | 0.02         | (0.02, 0.07)       |               |               |
| 098665  | PSDEFA1  | 0202034 | 192  | -0.08                       | 0.14 | 0.564 | -0.01  | (0.02, 0.02) | 0.842   | 4.61E-07 | -0.020 | 0.228           | 0.489  | -0.02    | (-0.08, 0.03)      | 0.001         | 0.818 | -0.008 | 0.025   | 0.741 | -0.01         | (-0.06, 0.04)      | -0.013        | 0.027         | 0.577   | -0.01        | (-0.06, 0.03)      |               |               |
| 026125  | EBAG9    | 0203096 | 192  | -0.07                       | 0.12 | 0.564 | -0.01  | (0.02, 0.03) | 0.842   | 0.024    | 0.024  | 0.024           | 0.485  | 0.02     | (0.03, 0.04)       | 0.001         | 0.024 | 0.024  | 0.485   | 0.02  | (0.03, 0.04)  | 0.001              | 0.024         | 0.485         | 0.02    | (0.03, 0.04) |                    |               |               |
| 042892  | FCF1     | 0202091 | 192  | -0.14                       | 0.24 | 0.560 | -0.01  | (0.06, 0.03) | 0.842   | 1.54E-75 | -0.001 | 0.047           | 0.988  | -0.29    | (-0.09, 0.09)      | 0.001         | 0.740 | -0.019 | 0.023   | 0.410 | -0.02         | (-0.06, 0.07)      | -0.027        | 0.023         | 0.238   | 0.03         | (0.02, 0.07)       |               |               |
| 097285  | FARSA    | 0203087 | 192  | -0.08                       | 0.14 | 0.563 | -0.01  | (0.02, 0.03) | 0.842   | 0.003    | -0.027 | 0.228           | 0.307  | -0.03    | (-0.08, 0.02)      | 0.002         | 0.124 | -0.005 | 0.020   | 0.802 | 0.01          | (-0.03, 0.03)      | -0.009        | 0.028         | 0.706   | -0.01        | (-0.06, 0.04)      |               |               |
| 026179  | EM1      | 0201233 | 192  | -0.07                       | 0.12 | 0.563 | -0.01  | (0.02, 0.03) | 0.842   | 0.012    | 0.023  | 0.228           | 0.307  | -0.03    | (-0.08, 0.02)      | 0.002         | 0.124 | -0.005 | 0.020   | 0.802 | 0.01          | (-0.03, 0.03)      | -0.009        | 0.028         | 0.706   | -0.01        | (-0.06, 0.04)      |               |               |
| 026171  | FN1      | 0203077 | 192  | -0.07                       | 0.12 | 0.563 | -0.01  | (0.02, 0.03) | 0.842   | 0.022    | -0.021 | 0.024           | 0.389  | -0.02    | (-0.07, 0.03)      | 0.002         | 0.175 | -0.012 | 0.022   | 0.604 | -0.01         | (-0.06, 0.03)      | -0.012        | 0.023         | 0.609   | -0.01        | (-0.06, 0.03)      |               |               |
| 015293  | GADD45B  | 0203096 | 192  | -0.07                       | 0.12 | 0.563 | -0.01  | (0.02, 0.03) | 0.842   | 0.002    | 0.023  | 0.228           | 0.307  | -0.03    | (-0.08, 0.02)      | 0.002         | 0.124 | -0.005 | 0.020   | 0.802 | 0.01          | (-0.03, 0.03)      | -0.009        | 0.028         | 0.706   | -0.01        | (-0.06, 0.04)      |               |               |
| 016665  | FN1A     | 0203025 | 192  | -0.07                       | 0.12 | 0.561 | -0.01  | (0.02, 0.02) | 0.842   | 0.427    | -0.023 | 0.024           | 0.322  | 0.02     | (0.07, 0.03)       | 0.001         | 0.417 | -0.03  |         |       |               |                    |               |               |         |              |                    |               |               |



Table S4. Association of type 2 diabetes with UKB-PPP plasma protein.

| UnProt  | Gene     | OD      | Inverse variance meta-analysis |        |       |        | MR Egger |              |         |         | Weighted median |        |      |              | Weighted mode |         |       |        |      |              |         |         |      |              |
|---------|----------|---------|--------------------------------|--------|-------|--------|----------|--------------|---------|---------|-----------------|--------|------|--------------|---------------|---------|-------|--------|------|--------------|---------|---------|------|--------------|
|         |          |         | n                              | nsnp   | bl/w  | se/blw | beta     | CI_low       | CI_high | FDR_low | bl/w            | se/blw | beta | CI_low       | CI_high       | FDR_low | bl/w  | se/blw | beta | CI_low       | CI_high | FDR_low |      |              |
| P09397  | HMSB     | 0021385 | 192                            | -0.006 | 0.011 | 0.624  | 0.01     | (0.62, 0.03) | 0.888   | 0.138   | 0.027           | 0.379  | 0.02 | (0.62, 0.07) | 0.001         | 0.455   | 0.029 | 0.627  | 0.01 | (0.61, 0.07) | 0.024   | 0.272   | 0.02 | (0.62, 0.07) |
| 073349  | ATP11B1  | 0023042 | 192                            | -0.007 | 0.014 | 0.628  | 0.01     | (0.62, 0.03) | 0.879   | 0.138   | 0.027           | 0.379  | 0.02 | (0.62, 0.07) | 0.001         | 0.455   | 0.029 | 0.627  | 0.01 | (0.61, 0.07) | 0.024   | 0.272   | 0.02 | (0.62, 0.07) |
| 070201  | C10orf79 | 0023018 | 192                            | -0.008 | 0.013 | 0.626  | 0.01     | (0.62, 0.03) | 0.889   | 0.137   | 0.027           | 0.380  | 0.02 | (0.62, 0.07) | 0.001         | 0.455   | 0.029 | 0.627  | 0.01 | (0.61, 0.07) | 0.024   | 0.272   | 0.02 | (0.62, 0.07) |
| 026X00  | C12orf75 | 0023018 | 192                            | -0.007 | 0.014 | 0.625  | 0.01     | (0.62, 0.03) | 0.889   | 0.138   | 0.027           | 0.379  | 0.02 | (0.62, 0.07) | 0.001         | 0.455   | 0.029 | 0.627  | 0.01 | (0.61, 0.07) | 0.024   | 0.272   | 0.02 | (0.62, 0.07) |
| 017862  | CD226    | 0023018 | 192                            | -0.007 | 0.014 | 0.625  | 0.01     | (0.62, 0.03) | 0.889   | 0.138   | 0.027           | 0.379  | 0.02 | (0.62, 0.07) | 0.001         | 0.455   | 0.029 | 0.627  | 0.01 | (0.61, 0.07) | 0.024   | 0.272   | 0.02 | (0.62, 0.07) |
| 016773  | KYAT1    | 0023022 | 192                            | -0.007 | 0.013 | 0.626  | 0.01     | (0.62, 0.03) | 0.889   | 0.137   | 0.027           | 0.380  | 0.02 | (0.62, 0.07) | 0.001         | 0.455   | 0.029 | 0.627  | 0.01 | (0.61, 0.07) | 0.024   | 0.272   | 0.02 | (0.62, 0.07) |
| 014271  | NBL1     | 0023018 | 192                            | -0.007 | 0.014 | 0.625  | 0.01     | (0.62, 0.03) | 0.889   | 0.138   | 0.027           | 0.379  | 0.02 | (0.62, 0.07) | 0.001         | 0.455   | 0.029 | 0.627  | 0.01 | (0.61, 0.07) | 0.024   | 0.272   | 0.02 | (0.62, 0.07) |
| P20155  | SPINK2   | 0023027 | 192                            | -0.008 | 0.012 | 0.625  | 0.01     | (0.62, 0.03) | 0.889   | 0.138   | 0.027           | 0.379  | 0.02 | (0.62, 0.07) | 0.001         | 0.455   | 0.029 | 0.627  | 0.01 | (0.61, 0.07) | 0.024   | 0.272   | 0.02 | (0.62, 0.07) |
| P08913  | ADRA2    | 0023067 | 192                            | -0.006 | 0.012 | 0.627  | 0.01     | (0.62, 0.03) | 0.889   | 0.137   | 0.027           | 0.380  | 0.02 | (0.62, 0.07) | 0.001         | 0.455   | 0.029 | 0.627  | 0.01 | (0.61, 0.07) | 0.024   | 0.272   | 0.02 | (0.62, 0.07) |
| 043423  | ANCSD3   | 0023018 | 192                            | -0.007 | 0.014 | 0.625  | 0.01     | (0.62, 0.03) | 0.889   | 0.138   | 0.027           | 0.379  | 0.02 | (0.62, 0.07) | 0.001         | 0.455   | 0.029 | 0.627  | 0.01 | (0.61, 0.07) | 0.024   | 0.272   | 0.02 | (0.62, 0.07) |
| 019338  | CAP3     | 0023126 | 192                            | -0.010 | 0.012 | 0.629  | 0.01     | (0.63, 0.05) | 0.889   | 0.138   | 0.027           | 0.379  | 0.02 | (0.62, 0.07) | 0.001         | 0.455   | 0.029 | 0.627  | 0.01 | (0.61, 0.07) | 0.024   | 0.272   | 0.02 | (0.62, 0.07) |
| 026S92  | CRACR2A  | 0021249 | 192                            | -0.007 | 0.014 | 0.629  | 0.01     | (0.63, 0.05) | 0.889   | 0.138   | 0.027           | 0.379  | 0.02 | (0.62, 0.07) | 0.001         | 0.455   | 0.029 | 0.627  | 0.01 | (0.61, 0.07) | 0.024   | 0.272   | 0.02 | (0.62, 0.07) |
| 026811  | EVL1     | 0023039 | 192                            | -0.007 | 0.014 | 0.629  | 0.01     | (0.63, 0.05) | 0.889   | 0.138   | 0.027           | 0.379  | 0.02 | (0.62, 0.07) | 0.001         | 0.455   | 0.029 | 0.627  | 0.01 | (0.61, 0.07) | 0.024   | 0.272   | 0.02 | (0.62, 0.07) |
| 06JWUW0 | LCN15    | 0023102 | 192                            | -0.007 | 0.014 | 0.628  | 0.01     | (0.63, 0.05) | 0.889   | 0.138   | 0.027           | 0.379  | 0.02 | (0.62, 0.07) | 0.001         | 0.455   | 0.029 | 0.627  | 0.01 | (0.61, 0.07) | 0.024   | 0.272   | 0.02 | (0.62, 0.07) |
| P5470   | LOXL4    | 0023074 | 192                            | -0.008 | 0.012 | 0.628  | 0.01     | (0.63, 0.05) | 0.889   | 0.138   | 0.027           | 0.379  | 0.02 | (0.62, 0.07) | 0.001         | 0.455   | 0.029 | 0.627  | 0.01 | (0.61, 0.07) | 0.024   | 0.272   | 0.02 | (0.62, 0.07) |
| 026V35  | NUDT15   | 0023102 | 192                            | -0.008 | 0.012 | 0.629  | 0.01     | (0.63, 0.05) | 0.889   | 0.138   | 0.027           | 0.379  | 0.02 | (0.62, 0.07) | 0.001         | 0.455   | 0.029 | 0.627  | 0.01 | (0.61, 0.07) | 0.024   | 0.272   | 0.02 | (0.62, 0.07) |
| P01210  | PENK     | 0023066 | 192                            | -0.011 | 0.023 | 0.628  | 0.01     | (0.63, 0.05) | 0.889   | 0.138   | 0.027           | 0.379  | 0.02 | (0.62, 0.07) | 0.001         | 0.455   | 0.029 | 0.627  | 0.01 | (0.61, 0.07) | 0.024   | 0.272   | 0.02 | (0.62, 0.07) |
| P03668  | AK1      | 0023092 | 192                            | -0.009 | 0.015 | 0.635  | 0.01     | (0.63, 0.05) | 0.870   | 0.135   | 0.027           | 0.380  | 0.02 | (0.62, 0.07) | 0.001         | 0.455   | 0.029 | 0.627  | 0.01 | (0.61, 0.07) | 0.024   | 0.272   | 0.02 | (0.62, 0.07) |
| 020552  | AKAP12   | 0023071 | 192                            | -0.008 | 0.013 | 0.636  | 0.01     | (0.63, 0.05) | 0.870   | 0.135   | 0.027           | 0.380  | 0.02 | (0.62, 0.07) | 0.001         | 0.455   | 0.029 | 0.627  | 0.01 | (0.61, 0.07) | 0.024   | 0.272   | 0.02 | (0.62, 0.07) |
| P23435  | KLHL21   | 0023081 | 192                            | -0.008 | 0.012 | 0.633  | 0.01     | (0.63, 0.05) | 0.870   | 0.135   | 0.027           | 0.380  | 0.02 | (0.62, 0.07) | 0.001         | 0.455   | 0.029 | 0.627  | 0.01 | (0.61, 0.07) | 0.024   | 0.272   | 0.02 | (0.62, 0.07) |
| 020701  | CDOLDF   | 0023089 | 192                            | -0.009 | 0.014 | 0.631  | 0.01     | (0.63, 0.05) | 0.870   | 0.135   | 0.027           | 0.380  | 0.02 | (0.62, 0.07) | 0.001         | 0.455   | 0.029 | 0.627  | 0.01 | (0.61, 0.07) | 0.024   | 0.272   | 0.02 | (0.62, 0.07) |
| P38962  | CDN1A    | 0023119 | 192                            | -0.007 | 0.014 | 0.633  | 0.01     | (0.63, 0.05) | 0.870   | 0.135   | 0.027           | 0.380  | 0.02 | (0.62, 0.07) | 0.001         | 0.455   | 0.029 | 0.627  | 0.01 | (0.61, 0.07) | 0.024   | 0.272   | 0.02 | (0.62, 0.07) |
| 020701  | CDN1A    | 0023119 | 192                            | -0.007 | 0.014 | 0.633  | 0.01     | (0.63, 0.05) | 0.870   | 0.135   | 0.027           | 0.380  | 0.02 | (0.62, 0.07) | 0.001         | 0.455   | 0.029 | 0.627  | 0.01 | (0.61, 0.07) | 0.024   | 0.272   | 0.02 | (0.62, 0.07) |
| 026WU2  | CHAC2    | 0023230 | 192                            | -0.008 | 0.013 | 0.636  | 0.01     | (0.63, 0.05) | 0.870   | 0.135   | 0.027           | 0.380  | 0.02 | (0.62, 0.07) | 0.001         | 0.455   | 0.029 | 0.627  | 0.01 | (0.61, 0.07) | 0.024   | 0.272   | 0.02 | (0.62, 0.07) |
| 026H30  | DHDH2    | 0023103 | 192                            | -0.008 | 0.013 | 0.632  | 0.01     | (0.63, 0.05) | 0.870   | 0.135   | 0.027           | 0.380  | 0.02 | (0.62, 0.07) | 0.001         | 0.455   | 0.029 | 0.627  | 0.01 | (0.61, 0.07) | 0.024   | 0.272   | 0.02 | (0.62, 0.07) |
| P04992  | HDM1     | 0023098 | 192                            | -0.008 | 0.013 | 0.635  | 0.01     | (0.63, 0.05) | 0.870   | 0.135   | 0.027           | 0.380  | 0.02 | (0.62, 0.07) | 0.001         | 0.455   | 0.029 | 0.627  | 0.01 | (0.61, 0.07) | 0.024   | 0.272   | 0.02 | (0.62, 0.07) |
| 026N97  | LZBR1    | 0023049 | 192                            | -0.008 | 0.013 | 0.635  | 0.01     | (0.63, 0.05) | 0.870   | 0.135   | 0.027           | 0.380  | 0.02 | (0.62, 0.07) | 0.001         | 0.455   | 0.029 | 0.627  | 0.01 | (0.61, 0.07) | 0.024   | 0.272   | 0.02 | (0.62, 0.07) |
| P03533  | LRPAP1   | 0023159 | 192                            | -0.013 | 0.026 | 0.631  | 0.01     | (0.63, 0.05) | 0.870   | 0.135   | 0.027           | 0.380  | 0.02 | (0.62, 0.07) | 0.001         | 0.455   | 0.029 | 0.627  | 0.01 | (0.61, 0.07) | 0.024   | 0.272   | 0.02 | (0.62, 0.07) |
| P43357  | MAGE2    | 0023031 | 192                            | -0.007 | 0.014 | 0.631  | 0.01     | (0.63, 0.05) | 0.870   | 0.135   | 0.027           | 0.380  | 0.02 | (0.62, 0.07) | 0.001         | 0.455   | 0.029 | 0.627  | 0.01 | (0.61, 0.07) | 0.024   | 0.272   | 0.02 | (0.62, 0.07) |
| 026V79  | MCR3     | 0023274 | 192                            | -0.007 | 0.014 | 0.631  | 0.01     | (0.63, 0.05) | 0.870   | 0.135   | 0.027           | 0.380  | 0.02 | (0.62, 0.07) | 0.001         | 0.455   | 0.029 | 0.627  | 0.01 | (0.61, 0.07) | 0.024   | 0.272   | 0.02 | (0.62, 0.07) |
| 026W03  | MTF3     | 0023103 | 192                            | -0.007 | 0.014 | 0.631  | 0.01     | (0.63, 0.05) | 0.870   | 0.135   | 0.027           | 0.380  | 0.02 | (0.62, 0.07) | 0.001         | 0.455   | 0.029 | 0.627  | 0.01 | (0.61, 0.07) | 0.024   | 0.272   | 0.02 | (0.62, 0.07) |
| 043776  | NARS1    | 0023105 | 192                            | -0.007 | 0.014 | 0.633  | 0.01     | (0.63, 0.05) | 0.870   | 0.135   | 0.027           | 0.380  | 0.02 | (0.62, 0.07) | 0.001         | 0.455   | 0.029 | 0.627  | 0.01 | (0.61, 0.07) | 0.024   | 0.272   | 0.02 | (0.62, 0.07) |
| P16066  | NRF1     | 0023016 | 192                            | -0.008 | 0.012 | 0.633  | 0.01     | (0.63, 0.05) | 0.870   | 0.135   | 0.027           | 0.380  | 0.02 | (0.62, 0.07) | 0.001         | 0.455   | 0.029 | 0.627  | 0.01 | (0.61, 0.07) | 0.024   | 0.272   | 0.02 | (0.62, 0.07) |
| P07296  | NUDC     | 0023098 | 192                            | -0.008 | 0.012 | 0.633  | 0.01     | (0.63, 0.05) | 0.870   | 0.135   | 0.027           | 0.380  | 0.02 | (0.62, 0.07) | 0.001         | 0.455   | 0.029 | 0.627  | 0.01 | (0.61, 0.07) | 0.024   | 0.272   | 0.02 | (0.62, 0.07) |
| 026V33  | SH3BP1   | 0023149 | 192                            | -0.008 | 0.012 | 0.636  | 0.01     | (0.63, 0.05) | 0.870   | 0.135   | 0.027           | 0.380  | 0.02 | (0.62, 0.07) | 0.001         | 0.455   | 0.029 | 0.627  | 0.01 | (0.61, 0.07) | 0.024   | 0.272   | 0.02 | (0.62, 0.07) |
| P61266  | STK18    | 0023034 | 192                            | -0.008 | 0.013 | 0.632  | 0.01     | (0.63, 0.05) | 0.870   | 0.135   | 0.027           | 0.380  | 0.02 | (0.62, 0.07) | 0.001         | 0.455   | 0.029 | 0.627  | 0.01 | (0.61, 0.07) | 0.024   | 0.272   | 0.02 | (0.62, 0.07) |
| P02844  | TANK     | 0023074 | 192                            | -0.008 | 0.013 | 0.632  | 0.01     | (0.63, 0.05) | 0.870   | 0.135   | 0.027           | 0.380  | 0.02 | (0.62, 0.07) | 0.001         | 0.455   | 0.029 | 0.627  | 0.01 | (0.61, 0.07) | 0.024   | 0.272   | 0.02 | (0.62, 0.07) |
| 026R92  | TSPG1    | 0023042 | 192                            | -0.008 | 0.012 | 0.633  | 0.01     | (0.63, 0.05) | 0.870   | 0.135   | 0.027           | 0.380  | 0.02 | (0.62, 0.07) | 0.001         | 0.455   | 0.029 | 0.627  | 0.01 | (0.61, 0.07) | 0.024   | 0.272   | 0.02 | (0.62, 0.07) |
| 026S41  | STO31A3  | 0023042 | 192                            | -0.008 | 0.012 | 0.633  | 0.01     | (0.63, 0.05) | 0.870   | 0.135   | 0.027           | 0.380  | 0.02 | (0.62, 0.07) | 0.001         | 0.455   | 0.029 | 0.627  | 0.01 | (0.61, 0.07) | 0.024   | 0.272   | 0.02 | (0.62, 0.07) |
| 026V18  | CRTP     | 0023042 | 192                            | -0.008 | 0.012 | 0.638  | 0.01     | (0.63, 0.05) | 0.871   | 0.135   | 0.027           | 0.380  | 0.02 | (0.62, 0.07) | 0.001         | 0.455   | 0.029 | 0.627  | 0.01 | (0.61, 0.07) | 0.024   | 0.272   | 0.02 | (0.62, 0.07) |
| 026H44  | RESF4    | 0023128 | 192                            | -0.005 | 0.012 | 0.638  | 0.01     | (0.63, 0.05) | 0.871   | 0.135   | 0.027           | 0.380  | 0.02 | (0.62, 0.07) | 0.001         | 0.455   | 0.029 | 0.627  | 0.01 | (0.61, 0.07) | 0.024   | 0.272   | 0.02 | (0.62, 0.07) |
| P41735  | TKNT     | 0023099 | 192                            | -0.005 | 0.012 | 0.640  | 0.01     | (0.63, 0.05) | 0.871   | 0.135   | 0.027           | 0.380  | 0.02 | (0.62, 0.07) | 0.001         | 0.455   | 0.029 | 0.627  | 0.01 | (0.61, 0.07) | 0.024   | 0.272   | 0.02 | (0.62, 0.07) |
| 026V88  | MIRA     | 0023115 | 192                            | -0.008 | 0.014 | 0.640  | 0.01     | (0.63, 0.05) | 0.871   | 0.135   | 0.027           | 0.380  | 0.02 | (0.62, 0.07) | 0.001         | 0.455   | 0.029 | 0.627  | 0.01 | (0.61, 0.07) | 0.024   | 0.272   | 0.02 | (0.62, 0.07) |
| 026V43  | ANKK1    | 0023197 | 192                            | -0.008 | 0.014 | 0.641  | 0.01     | (0.63, 0.05) | 0.871   | 0.135   | 0.027           | 0.380  | 0.02 | (0.62, 0.07) | 0.001         | 0.455   | 0.029 | 0.627  | 0.01 | (0.61, 0.07) | 0.024   | 0.272   | 0.02 | (0.62, 0.07) |
| 026V83  | NTG2     | 0023103 | 192                            | -0.008 | 0.014 | 0.641  | 0.01     | (0.63, 0.05) | 0.871   | 0.135   | 0.027           | 0.380  | 0.02 | (0.62, 0.07) | 0.001         |         |       |        |      |              |         |         |      |              |

Table S4. Association of type 2 diabetes with UKB-PPP plasma protein.

| UnProt | Gene    | OD      | nsnp | Inverse variance |         |          |           | MR Egger      |       |           |          | Weighted mode |        |              |                    | Weighted mode |        |         |             |               |              |               |        |       |       |              |              |
|--------|---------|---------|------|------------------|---------|----------|-----------|---------------|-------|-----------|----------|---------------|--------|--------------|--------------------|---------------|--------|---------|-------------|---------------|--------------|---------------|--------|-------|-------|--------------|--------------|
|        |         |         |      | beta             | se_beta | pval_ivw | CI_low    | CI_high       | pval  | egger     | se_egger | pval_egger    | CI_low | CI_high      | se_weighted        | pval_weighted | CI_low | CI_high | se_weighted | pval_weighted | CI_low       | CI_high       |        |       |       |              |              |
| 097175 | CXCL14  | 0202458 | 192  | 0.001            | 0.11    | 0.708    | -1.56e-03 | (0.02, 0.03)  | 0.001 | 0.148     | 0.003    | 0.223         | 0.807  | 0.266e-03    | (0.04, 0.05)       | 0.000         | 0.939  | -0.011  | 0.221       | 0.613         | -0.01        | (0.02, 0.03)  | -0.007 | 0.222 | 0.771 | -0.01        | (0.02, 0.04) |
| 097994 | EDMD2   | 0203138 | 192  | 0.005            | 0.12    | 0.735    | -4.58e-03 | (0.02, 0.03)  | 0.013 | 0.263     | 0.012    | 0.023         | 0.611  | (0.04, 0.08) | 0.002              | 0.912         | -0.022 | 0.228   | 0.412       | -0.02         | (0.02, 0.03) | -0.022        | 0.228  | 0.851 | -0.02 | (0.04, 0.04) |              |
| 098011 | ENPEP   | 0203302 | 192  | -0.005           | 0.13    | 0.708    | -4.90e-03 | (0.02, 0.02)  | 0.001 | 0.008     | 0.023    | 0.225         | 0.322  | -0.02        | (0.07, 0.03)       | 0.001         | 0.403  | -0.007  | 0.224       | 0.786         | -0.01        | (0.05, 0.04)  | -0.023 | 0.223 | 0.319 | -0.02        | (0.07, 0.02) |
| 098090 | KSRF9   | 0202167 | 17   | -0.015           | 0.440   | 0.707    | -0.01     | (-0.09, 0.06) | 0.001 | 2.696e-04 | 0.063    | 0.026         | 0.226  | 0.02         | (0.03, 0.16)       | 0.010         | 0.042  | -0.022  | 0.228       | 0.415         | 0.02         | (0.02, 0.03)  | -0.023 | 0.228 | 0.528 | 0.02         | (0.04, 0.06) |
| 098167 | MERTK   | 0202657 | 192  | 0.005            | 0.12    | 0.735    | -4.58e-03 | (0.02, 0.03)  | 0.013 | 0.263     | 0.012    | 0.023         | 0.611  | (0.04, 0.08) | 0.002              | 0.912         | -0.022 | 0.228   | 0.412       | -0.02         | (0.02, 0.03) | -0.022        | 0.228  | 0.851 | -0.02 | (0.04, 0.04) |              |
| 098338 | SIGLEC9 | 0202190 | 192  | -0.007           | 0.107   | 0.708    | -0.01     | (-0.04, 0.03) | 0.001 | 1.075e-05 | -0.007   | 0.024         | 0.630  | -0.01        | (0.07, 0.06)       | 0.000         | 0.981  | -0.008  | 0.215       | 0.701         | -0.01        | (0.04, 0.02)  | -0.011 | 0.218 | 0.554 | -0.01        | (0.05, 0.02) |
| 098422 | SMAD3   | 0202020 | 36   | -0.002           | 0.174   | 0.711    | -0.01     | (-0.05, 0.03) | 0.003 | 0.025     | 0.025    | 0.025         | 0.629  | -0.01        | (0.05, 0.04)       | 0.000         | 0.981  | -0.008  | 0.215       | 0.701         | -0.01        | (0.04, 0.02)  | -0.011 | 0.218 | 0.554 | -0.01        | (0.05, 0.02) |
| 098537 | CCM2B21 | 0202120 | 192  | 0.005            | 0.12    | 0.708    | -4.58e-03 | (0.02, 0.03)  | 0.001 | 1.075e-05 | -0.007   | 0.024         | 0.630  | -0.01        | (0.07, 0.06)       | 0.000         | 0.981  | -0.008  | 0.215       | 0.701         | -0.01        | (0.04, 0.02)  | -0.011 | 0.218 | 0.554 | -0.01        | (0.05, 0.02) |
| 098598 | BABAM1  | 0203466 | 192  | -0.004           | 0.12    | 0.710    | -4.49e-03 | (0.02, 0.02)  | 0.002 | 0.851     | -0.016   | 0.023         | 0.504  | -0.02        | (0.08, 0.03)       | 0.001         | 0.578  | -0.028  | 0.224       | 0.281         | -0.03        | (0.07, 0.02)  | -0.034 | 0.224 | 0.184 | -0.03        | (0.08, 0.01) |
| 098635 | NELL2   | 0203035 | 192  | -0.005           | 0.12    | 0.735    | -4.58e-03 | (0.02, 0.03)  | 0.013 | 0.263     | 0.012    | 0.023         | 0.611  | (0.04, 0.08) | 0.002              | 0.912         | -0.022 | 0.228   | 0.412       | -0.02         | (0.02, 0.03) | -0.022        | 0.228  | 0.851 | -0.02 | (0.04, 0.04) |              |
| 098644 | B2M     | 0203035 | 192  | -0.005           | 0.13    | 0.711    | -4.78e-03 | (0.02, 0.02)  | 0.002 | 0.062     | -0.060   | 0.025         | 0.515  | -0.06        | (-0.11, -0.01)     | 0.004         | 0.009  | -0.029  | 0.222       | 0.080         | -0.04        | (0.08, 0.04)  | -0.023 | 0.228 | 0.035 | -0.18        | (0.03, 0.02) |
| 098658 | ITGA7   | 0203275 | 192  | 0.005            | 0.14    | 0.714    | -0.01     | (-0.02, 0.03) | 0.003 | 1.21E+06  | -0.041   | 0.028         | 0.124  | -0.04        | (-0.09, 0.01)      | 0.003         | 0.053  | -0.023  | 0.221       | 0.275         | -0.02        | (0.02, 0.02)  | -0.018 | 0.221 | 0.422 | -0.02        | (0.02, 0.03) |
| 098666 | CLTA    | 0203116 | 192  | -0.004           | 0.12    | 0.735    | -4.58e-03 | (0.02, 0.03)  | 0.013 | 0.263     | 0.012    | 0.023         | 0.611  | (0.04, 0.08) | 0.002              | 0.912         | -0.022 | 0.228   | 0.412       | -0.02         | (0.02, 0.03) | -0.022        | 0.228  | 0.851 | -0.02 | (0.04, 0.04) |              |
| 098685 | EDM1    | 0203109 | 192  | 0.005            | 0.14    | 0.713    | -0.01     | (-0.02, 0.03) | 0.003 | 4.79E+09  | 0.007    | 0.028         | 0.792  | 0.01         | (0.05, 0.06)       | 0.000         | 0.930  | -0.018  | 0.222       | 0.414         | 0.02         | (0.02, 0.02)  | -0.007 | 0.221 | 0.753 | 0.01         | (0.04, 0.05) |
| 098691 | LY8RA   | 0202020 | 36   | -0.002           | 0.174   | 0.711    | -0.01     | (-0.05, 0.03) | 0.003 | 0.025     | 0.014    | 0.054         | 0.714  | -0.01        | (-0.06, 0.08)      | 0.002         | 0.458  | -0.007  | 0.228       | 0.677         | -0.01        | (0.05, 0.04)  | -0.005 | 0.220 | 0.151 | -0.01        | (0.06, 0.03) |
| 098760 | L33     | 0202428 | 192  | -0.004           | 0.12    | 0.714    | -4.42e-03 | (0.02, 0.02)  | 0.003 | 0.833     | -0.050   | 0.023         | 0.535  | -0.05        | (-0.10, -0.36e-03) | 0.002         | 0.025  | -0.024  | 0.221       | 0.251         | -0.02        | (0.02, 0.02)  | -0.032 | 0.223 | 0.165 | -0.03        | (0.08, 0.01) |
| 098781 | LGALS3  | 0202028 | 192  | 0.005            | 0.14    | 0.714    | -0.01     | (-0.02, 0.03) | 0.003 | 8.57E+13  | -0.009   | 0.026         | 0.733  | -0.01        | (-0.06, 0.04)      | 0.001         | 0.536  | -0.015  | 0.222       | 0.508         | -0.01        | (-0.03, 0.06) | -0.016 | 0.223 | 0.484 | 0.02         | (0.03, 0.06) |
| 098823 | MYH4    | 0203035 | 192  | -0.002           | 0.12    | 0.735    | -4.58e-03 | (0.02, 0.03)  | 0.013 | 0.263     | 0.012    | 0.023         | 0.611  | (0.04, 0.08) | 0.002              | 0.912         | -0.022 | 0.228   | 0.412       | -0.02         | (0.02, 0.03) | -0.022        | 0.228  | 0.851 | -0.02 | (0.04, 0.04) |              |
| 098827 | NEMO    | 0203078 | 192  | 0.005            | 0.13    | 0.713    | -4.94e-03 | (0.02, 0.03)  | 0.003 | 0.001     | -0.014   | 0.028         | 0.602  | -0.01        | (-0.06, 0.04)      | 0.001         | 0.407  | -0.016  | 0.224       | 0.511         | -0.02        | (0.08, 0.03)  | -0.019 | 0.222 | 0.392 | -0.02        | (0.08, 0.02) |
| 098828 | STOML2  | 0203183 | 192  | 0.005            | 0.13    | 0.714    | -4.82e-03 | (0.02, 0.03)  | 0.003 | 0.048     | 0.016    | 0.028         | 0.540  | -0.02        | (0.03, 0.07)       | 0.001         | 0.620  | -0.005  | 0.226       | 0.682         | -0.04        | (-0.06, 0.05) | -0.007 | 0.225 | 0.784 | -0.01        | (0.06, 0.04) |
| 098829 | TLR4    | 0203035 | 192  | -0.005           | 0.12    | 0.735    | -4.58e-03 | (0.02, 0.03)  | 0.013 | 0.263     | 0.012    | 0.023         | 0.611  | (0.04, 0.08) | 0.002              | 0.912         | -0.022 | 0.228   | 0.412       | -0.02         | (0.02, 0.03) | -0.022        | 0.228  | 0.851 | -0.02 | (0.04, 0.04) |              |
| 098843 | CCT5    | 0203210 | 192  | -0.005           | 0.14    | 0.716    | -4.94e-03 | (0.02, 0.02)  | 0.004 | 0.002     | -0.016   | 0.028         | 0.551  | -0.02        | (-0.07, 0.04)      | 0.001         | 0.613  | -0.011  | 0.228       | 0.679         | -0.01        | (-0.06, 0.04) | -0.012 | 0.224 | 0.818 | -0.01        | (0.06, 0.04) |
| 098845 | EXTL1   | 0203014 | 192  | -0.004           | 0.12    | 0.735    | -4.27e-03 | (0.02, 0.02)  | 0.004 | 0.108     | -0.004   | 0.024         | 0.616  | -0.01        | (-0.06, 0.04)      | 0.000         | 0.981  | -0.004  | 0.223       | 0.309         | -0.02        | (0.07, 0.02)  | -0.036 | 0.227 | 0.179 | -0.04        | (0.04, 0.02) |
| 098846 | OR8M40  | 0203134 | 192  | -0.005           | 0.14    | 0.716    | -0.01     | (-0.03, 0.02) | 0.004 | 0.001     | -0.028   | 0.027         | 0.233  | -0.01        | (-0.08, 0.02)      | 0.001         | 0.311  | -0.006  | 0.225       | 0.815         | -0.01        | (0.05, 0.04)  | -0.012 | 0.224 | 0.775 | -0.01        | (0.05, 0.04) |
| 098847 | OR8M50  | 0203134 | 192  | -0.005           | 0.14    | 0.716    | -0.01     | (-0.03, 0.02) | 0.004 | 0.001     | -0.028   | 0.027         | 0.233  | -0.01        | (-0.08, 0.02)      | 0.001         | 0.311  | -0.006  | 0.225       | 0.815         | -0.01        | (0.05, 0.04)  | -0.012 | 0.224 | 0.775 | -0.01        | (0.05, 0.04) |
| 098848 | OR8M51  | 0203134 | 192  | -0.005           | 0.14    | 0.716    | -0.01     | (-0.03, 0.02) | 0.004 | 0.001     | -0.028   | 0.027         | 0.233  | -0.01        | (-0.08, 0.02)      | 0.001         | 0.311  | -0.006  | 0.225       | 0.815         | -0.01        | (0.05, 0.04)  | -0.012 | 0.224 | 0.775 | -0.01        | (0.05, 0.04) |
| 098849 | OR8M52  | 0203134 | 192  | -0.005           | 0.14    | 0.716    | -0.01     | (-0.03, 0.02) | 0.004 | 0.001     | -0.028   | 0.027         | 0.233  | -0.01        | (-0.08, 0.02)      | 0.001         | 0.311  | -0.006  | 0.225       | 0.815         | -0.01        | (0.05, 0.04)  | -0.012 | 0.224 | 0.775 | -0.01        | (0.05, 0.04) |
| 098850 | OR8M53  | 0203134 | 192  | -0.005           | 0.14    | 0.716    | -0.01     | (-0.03, 0.02) | 0.004 | 0.001     | -0.028   | 0.027         | 0.233  | -0.01        | (-0.08, 0.02)      | 0.001         | 0.311  | -0.006  | 0.225       | 0.815         | -0.01        | (0.05, 0.04)  | -0.012 | 0.224 | 0.775 | -0.01        | (0.05, 0.04) |
| 098851 | OR8M54  | 0203134 | 192  | -0.005           | 0.14    | 0.716    | -0.01     | (-0.03, 0.02) | 0.004 | 0.001     | -0.028   | 0.027         | 0.233  | -0.01        | (-0.08, 0.02)      | 0.001         | 0.311  | -0.006  | 0.225       | 0.815         | -0.01        | (0.05, 0.04)  | -0.012 | 0.224 | 0.775 | -0.01        | (0.05, 0.04) |
| 098852 | OR8M55  | 0203134 | 192  | -0.005           | 0.14    | 0.716    | -0.01     | (-0.03, 0.02) | 0.004 | 0.001     | -0.028   | 0.027         | 0.233  | -0.01        | (-0.08, 0.02)      | 0.001         | 0.311  | -0.006  | 0.225       | 0.815         | -0.01        | (0.05, 0.04)  | -0.012 | 0.224 | 0.775 | -0.01        | (0.05, 0.04) |
| 098853 | OR8M56  | 0203134 | 192  | -0.005           | 0.14    | 0.716    | -0.01     | (-0.03, 0.02) | 0.004 | 0.001     | -0.028   | 0.027         | 0.233  | -0.01        | (-0.08, 0.02)      | 0.001         | 0.311  | -0.006  | 0.225       | 0.815         | -0.01        | (0.05, 0.04)  | -0.012 | 0.224 | 0.775 | -0.01        | (0.05, 0.04) |
| 098854 | OR8M57  | 0203134 | 192  | -0.005           | 0.14    | 0.716    | -0.01     | (-0.03, 0.02) | 0.004 | 0.001     | -0.028   | 0.027         | 0.233  | -0.01        | (-0.08, 0.02)      | 0.001         | 0.311  | -0.006  | 0.225       | 0.815         | -0.01        | (0.05, 0.04)  | -0.012 | 0.224 | 0.775 | -0.01        | (0.05, 0.04) |
| 098855 | OR8M58  | 0203134 | 192  | -0.005           | 0.14    | 0.716    | -0.01     | (-0.03, 0.02) | 0.004 | 0.001     | -0.028   | 0.027         | 0.233  | -0.01        | (-0.08, 0.02)      | 0.001         | 0.311  | -0.006  | 0.225       | 0.815         | -0.01        | (0.05, 0.04)  | -0.012 | 0.224 | 0.775 | -0.01        | (0.05, 0.04) |
| 098856 | OR8M59  | 0203134 | 192  | -0.005           | 0.14    | 0.716    | -0.01     | (-0.03, 0.02) | 0.004 | 0.001     | -0.028   | 0.027         | 0.233  | -0.01        | (-0.08, 0.02)      | 0.001         | 0.311  | -0.006  | 0.225       | 0.815         | -0.01        | (0.05, 0.04)  | -0.012 | 0.224 | 0.775 | -0.01        | (0.05, 0.04) |
| 098857 | OR8M60  | 0203134 | 192  | -0.005           | 0.14    | 0.716    | -0.01     | (-0.03, 0.02) | 0.004 | 0.001     | -0.028   | 0.027         | 0.233  | -0.01        | (-0.08, 0.02)      | 0.001         | 0.311  | -0.006  | 0.225       | 0.815         | -0.01        | (0.05, 0.04)  | -0.012 | 0.224 | 0.775 | -0.01        | (0.05, 0.04) |
| 098858 | OR8M61  | 0203134 | 192  | -0.005           | 0.14    | 0.716    | -0.01     | (-0.03, 0.02) | 0.004 | 0.001     | -0.028   | 0.027         | 0.233  | -0.01        | (-0.08, 0.02)      | 0.001         | 0.311  | -0.006  | 0.225       | 0.815         | -0.01        | (0.05, 0.04)  | -0.012 | 0.224 | 0.775 | -0.01        | (0.05, 0.04) |
| 098859 | OR8M62  | 0203134 | 192  | -0.005           | 0.14    | 0.716    | -0.01     | (-0.03, 0.02) | 0.004 | 0.001     | -0.028   | 0.027         | 0.233  | -0.01        | (-0.08, 0.02)      | 0.001         | 0.311  | -0.006  | 0.225       | 0.815         | -0.01        | (0.05, 0.04)  | -0.012 | 0.224 | 0.775 | -0.01        | (0.05, 0.04) |
| 098860 | OR8M63  | 0203134 | 192  | -0.005           | 0.14    | 0.716    | -0.01     | (-0.03, 0.02) | 0.004 | 0.001     | -0.028   | 0.027         | 0.233  | -0.01        | (-0.08, 0.02)      | 0.001         | 0.311  | -0.006  | 0.225       | 0.815         | -0.01        | (0.05, 0.04)  | -0.012 | 0.224 | 0.775 | -0.01        | (0.05, 0.04) |
| 098861 | OR8M64  | 0203134 | 192  | -0.005           | 0.14    | 0.716    | -0.01     | (-0.03, 0.02) | 0.004 | 0.001     | -0.028   | 0.027         | 0.233  | -0.01        | (-0.08, 0.02)      | 0.001         | 0.311  | -0.006  | 0.225       | 0.815         | -0.01        | (0.05, 0.04)  | -0.012 | 0.224 | 0.775 | -0.01        | (0.05, 0.04) |
| 098862 | OR8M65  | 0203134 | 192  | -0.005           | 0.14    | 0.716    | -0.01     | (-0.03, 0.02) | 0.004 | 0.001     | -0.028   | 0.027         | 0.233  | -0.01        | (-0.08, 0.02)      | 0.001         | 0.311  | -0.006  | 0.225       | 0.815         | -0.01        | (0.05, 0.04)  | -0.012 |       |       |              |              |

Table S4. Association of type 2 diabetes with UKG-PPP plasma protein.

| UnProt | Gene     | OID     | nsnp | lnv    |       | rs    |           | pval         |       | CI               |                  | MR Egger |          | Weighted median |                    | Weighted mode |        |         |       |              |        |                  |        |       |              |           |              |
|--------|----------|---------|------|--------|-------|-------|-----------|--------------|-------|------------------|------------------|----------|----------|-----------------|--------------------|---------------|--------|---------|-------|--------------|--------|------------------|--------|-------|--------------|-----------|--------------|
|        |          |         |      | b/w    | se/w  | b/w   | se/w      | pval         | CI    | FDR <sub>W</sub> | p <sub>val</sub> | egger    | se/egger | se/egger        | pval               | CI            | b/mode | se/mode | pval  | CI           |        |                  |        |       |              |           |              |
| Q04999 | PDEF     | Q030084 | 192  | -0.003 | 0.012 | 0.796 | -1.31e-03 | (0.03, 0.02) | 0.939 | 0.670            | 0.209            | 0.223    | 0.211    | 0.02            | 0.192              | -0.012        | 0.225  | 0.643   | -0.01 | (0.06, 0.04) | -0.008 | 0.224            | 0.738  | -0.01 | (0.06, 0.04) |           |              |
| Q06003 | PCOL2    | Q030086 | 192  | -0.003 | 0.012 | 0.790 | -2.22e-03 | (0.02, 0.03) | 0.938 | 0.676            | 0.184            | 0.205    | 0.179    | 0.02            | 0.192              | 0.005         | 0.225  | 0.643   | -0.01 | (0.06, 0.05) | -0.008 | 0.224            | 0.738  | -0.01 | (0.06, 0.05) |           |              |
| Q08200 | PNMA1    | Q030194 | 192  | -0.003 | 0.013 | 0.795 | -3.36e-03 | (0.02, 0.02) | 0.939 | 0.646            | -0.014           | 0.225    | 0.584    | -0.01           | (0.06, 0.04)       | 0.001         | 0.628  | -0.018  | 0.224 | 0.643        | -0.02  | (0.06, 0.03)     | -0.016 | 0.224 | 0.515        | -0.02     | (0.06, 0.03) |
| Q09422 | PNMA2    | Q030482 | 192  | -0.003 | 0.012 | 0.795 | -3.36e-03 | (0.02, 0.03) | 0.939 | 0.617            | -0.004           | 0.223    | 0.649    | -0.01           | (0.06, 0.05, 0.04) | 0.000         | 0.705  | -0.008  | 0.225 | 0.738        | -0.01  | (0.06, 0.04)     | -0.001 | 0.225 | 0.955        | -1.46e-03 | (0.05, 0.05) |
| Q10244 | PRSS2    | Q030483 | 192  | -0.003 | 0.012 | 0.795 | -3.36e-03 | (0.02, 0.03) | 0.939 | 0.617            | -0.004           | 0.223    | 0.649    | -0.01           | (0.06, 0.05, 0.04) | 0.000         | 0.705  | -0.008  | 0.225 | 0.738        | -0.01  | (0.06, 0.04)     | -0.001 | 0.225 | 0.955        | -1.46e-03 | (0.05, 0.05) |
| Q10477 | SRVZL    | Q030050 | 192  | -0.003 | 0.012 | 0.802 | -3.03e-03 | (0.02, 0.03) | 0.939 | 0.605            | -0.007           | 0.225    | 0.783    | -0.01           | (0.04, 0.08)       | 0.000         | 0.854  | -0.012  | 0.224 | 0.619        | -0.01  | (0.06, 0.04)     | -0.001 | 0.226 | 0.985        | -1.15e-03 | (0.05, 0.05) |
| Q10541 | TFAP5    | Q030050 | 192  | -0.003 | 0.012 | 0.802 | -3.03e-03 | (0.02, 0.03) | 0.939 | 0.605            | -0.007           | 0.225    | 0.783    | -0.01           | (0.04, 0.08)       | 0.000         | 0.854  | -0.012  | 0.224 | 0.619        | -0.01  | (0.06, 0.04)     | -0.001 | 0.226 | 0.985        | -1.15e-03 | (0.05, 0.05) |
| Q10543 | TGFB2    | Q030050 | 192  | -0.004 | 0.013 | 0.788 | -3.58e-03 | (0.02, 0.02) | 0.939 | 0.608            | -0.007           | 0.226    | 0.794    | -0.01           | (0.06, 0.04)       | 0.000         | 0.885  | -0.008  | 0.225 | 0.738        | -0.01  | (0.06, 0.04)     | -0.015 | 0.223 | 0.523        | -0.01     | (0.06, 0.03) |
| Q10678 | TNFSF11B | Q030852 | 192  | -0.003 | 0.012 | 0.788 | -3.58e-03 | (0.02, 0.03) | 0.939 | 0.604            | 0.025            | 0.224    | 0.295    | 0.02            | (0.02, 0.07)       | 0.001         | 0.289  | 0.040   | 0.222 | 0.601        | 0.04   | (1.82e-05, 0.08) | 0.043  | 0.225 | 0.088        | 0.04      | (0.01, 0.09) |
| Q11788 | TNFSF11B | Q030852 | 192  | -0.003 | 0.012 | 0.788 | -3.58e-03 | (0.02, 0.03) | 0.939 | 0.604            | 0.025            | 0.224    | 0.295    | 0.02            | (0.02, 0.07)       | 0.001         | 0.289  | 0.040   | 0.222 | 0.601        | 0.04   | (1.82e-05, 0.08) | 0.043  | 0.225 | 0.088        | 0.04      | (0.01, 0.09) |
| Q14386 | TNXL1    | Q030182 | 192  | -0.004 | 0.014 | 0.799 | -3.65e-03 | (0.02, 0.02) | 0.939 | 1.475            | 0.014            | 0.228    | 0.704    | 0.01            | (0.04, 0.07)       | 0.001         | 0.551  | -0.005  | 0.224 | 0.834        | -0.01  | (0.05, 0.04)     | 0.002  | 0.234 | 0.941        | 1.81e-03  | (0.05, 0.05) |
| Q14931 | USP31    | Q030128 | 192  | -0.003 | 0.011 | 0.801 | -2.87e-03 | (0.03, 0.02) | 0.939 | 0.458            | -0.007           | 0.227    | 0.707    | -0.01           | (0.05, 0.04)       | 0.000         | 0.845  | -0.005  | 0.223 | 0.839        | -0.00  | (0.05, 0.04)     | -0.009 | 0.223 | 0.892        | -0.01     | (0.05, 0.04) |
| Q15061 | USP31    | Q030128 | 192  | -0.003 | 0.011 | 0.801 | -2.87e-03 | (0.03, 0.02) | 0.939 | 0.458            | -0.007           | 0.227    | 0.707    | -0.01           | (0.05, 0.04)       | 0.000         | 0.845  | -0.005  | 0.223 | 0.839        | -0.00  | (0.05, 0.04)     | -0.009 | 0.223 | 0.892        | -0.01     | (0.05, 0.04) |
| Q15061 | USP31    | Q030128 | 192  | -0.004 | 0.013 | 0.789 | -3.52e-03 | (0.02, 0.02) | 0.939 | 0.608            | -0.018           | 0.228    | 0.680    | -0.02           | (0.07, 0.02)       | 0.000         | 0.845  | -0.022  | 0.224 | 0.639        | -0.02  | (0.07, 0.02)     | -0.017 | 0.223 | 0.483        | -0.02     | (0.06, 0.03) |
| Q15061 | USP31    | Q030128 | 192  | -0.004 | 0.013 | 0.789 | -3.52e-03 | (0.02, 0.02) | 0.939 | 0.608            | -0.018           | 0.228    | 0.680    | -0.02           | (0.07, 0.02)       | 0.000         | 0.845  | -0.022  | 0.224 | 0.639        | -0.02  | (0.07, 0.02)     | -0.017 | 0.223 | 0.483        | -0.02     | (0.06, 0.03) |
| Q15061 | USP31    | Q030128 | 192  | -0.003 | 0.013 | 0.803 | -3.22e-03 | (0.02, 0.03) | 0.940 | 0.608            | -0.008           | 0.226    | 0.807    | -0.01           | (0.06, 0.04)       | 0.001         | 0.694  | -0.002  | 0.224 | 0.929        | 0.02   | (0.05, 0.05)     | -0.009 | 0.223 | 0.760        | -0.01     | (0.05, 0.04) |
| Q15172 | PP2R2A   | Q030150 | 192  | -0.003 | 0.013 | 0.803 | -3.22e-03 | (0.02, 0.03) | 0.940 | 0.608            | -0.008           | 0.226    | 0.807    | -0.01           | (0.06, 0.04)       | 0.001         | 0.694  | -0.002  | 0.224 | 0.929        | 0.02   | (0.05, 0.05)     | -0.009 | 0.223 | 0.760        | -0.01     | (0.05, 0.04) |
| Q15172 | PP2R2A   | Q030150 | 192  | -0.003 | 0.013 | 0.803 | -3.22e-03 | (0.02, 0.03) | 0.940 | 0.608            | -0.008           | 0.226    | 0.807    | -0.01           | (0.06, 0.04)       | 0.001         | 0.694  | -0.002  | 0.224 | 0.929        | 0.02   | (0.05, 0.05)     | -0.009 | 0.223 | 0.760        | -0.01     | (0.05, 0.04) |
| Q15172 | PP2R2A   | Q030150 | 192  | -0.003 | 0.013 | 0.803 | -3.22e-03 | (0.02, 0.03) | 0.940 | 0.608            | -0.008           | 0.226    | 0.807    | -0.01           | (0.06, 0.04)       | 0.001         | 0.694  | -0.002  | 0.224 | 0.929        | 0.02   | (0.05, 0.05)     | -0.009 | 0.223 | 0.760        | -0.01     | (0.05, 0.04) |
| Q15172 | PP2R2A   | Q030150 | 192  | -0.003 | 0.013 | 0.803 | -3.22e-03 | (0.02, 0.03) | 0.940 | 0.608            | -0.008           | 0.226    | 0.807    | -0.01           | (0.06, 0.04)       | 0.001         | 0.694  | -0.002  | 0.224 | 0.929        | 0.02   | (0.05, 0.05)     | -0.009 | 0.223 | 0.760        | -0.01     | (0.05, 0.04) |
| Q15172 | PP2R2A   | Q030150 | 192  | -0.003 | 0.013 | 0.803 | -3.22e-03 | (0.02, 0.03) | 0.940 | 0.608            | -0.008           | 0.226    | 0.807    | -0.01           | (0.06, 0.04)       | 0.001         | 0.694  | -0.002  | 0.224 | 0.929        | 0.02   | (0.05, 0.05)     | -0.009 | 0.223 | 0.760        | -0.01     | (0.05, 0.04) |
| Q15172 | PP2R2A   | Q030150 | 192  | -0.003 | 0.013 | 0.803 | -3.22e-03 | (0.02, 0.03) | 0.940 | 0.608            | -0.008           | 0.226    | 0.807    | -0.01           | (0.06, 0.04)       | 0.001         | 0.694  | -0.002  | 0.224 | 0.929        | 0.02   | (0.05, 0.05)     | -0.009 | 0.223 | 0.760        | -0.01     | (0.05, 0.04) |
| Q15172 | PP2R2A   | Q030150 | 192  | -0.003 | 0.013 | 0.803 | -3.22e-03 | (0.02, 0.03) | 0.940 | 0.608            | -0.008           | 0.226    | 0.807    | -0.01           | (0.06, 0.04)       | 0.001         | 0.694  | -0.002  | 0.224 | 0.929        | 0.02   | (0.05, 0.05)     | -0.009 | 0.223 | 0.760        | -0.01     | (0.05, 0.04) |
| Q15172 | PP2R2A   | Q030150 | 192  | -0.003 | 0.013 | 0.803 | -3.22e-03 | (0.02, 0.03) | 0.940 | 0.608            | -0.008           | 0.226    | 0.807    | -0.01           | (0.06, 0.04)       | 0.001         | 0.694  | -0.002  | 0.224 | 0.929        | 0.02   | (0.05, 0.05)     | -0.009 | 0.223 | 0.760        | -0.01     | (0.05, 0.04) |
| Q15172 | PP2R2A   | Q030150 | 192  | -0.003 | 0.013 | 0.803 | -3.22e-03 | (0.02, 0.03) | 0.940 | 0.608            | -0.008           | 0.226    | 0.807    | -0.01           | (0.06, 0.04)       | 0.001         | 0.694  | -0.002  | 0.224 | 0.929        | 0.02   | (0.05, 0.05)     | -0.009 | 0.223 | 0.760        | -0.01     | (0.05, 0.04) |
| Q15172 | PP2R2A   | Q030150 | 192  | -0.003 | 0.013 | 0.803 | -3.22e-03 | (0.02, 0.03) | 0.940 | 0.608            | -0.008           | 0.226    | 0.807    | -0.01           | (0.06, 0.04)       | 0.001         | 0.694  | -0.002  | 0.224 | 0.929        | 0.02   | (0.05, 0.05)     | -0.009 | 0.223 | 0.760        | -0.01     | (0.05, 0.04) |
| Q15172 | PP2R2A   | Q030150 | 192  | -0.003 | 0.013 | 0.803 | -3.22e-03 | (0.02, 0.03) | 0.940 | 0.608            | -0.008           | 0.226    | 0.807    | -0.01           | (0.06, 0.04)       | 0.001         | 0.694  | -0.002  | 0.224 | 0.929        | 0.02   | (0.05, 0.05)     | -0.009 | 0.223 | 0.760        | -0.01     | (0.05, 0.04) |
| Q15172 | PP2R2A   | Q030150 | 192  | -0.003 | 0.013 | 0.803 | -3.22e-03 | (0.02, 0.03) | 0.940 | 0.608            | -0.008           | 0.226    | 0.807    | -0.01           | (0.06, 0.04)       | 0.001         | 0.694  | -0.002  | 0.224 | 0.929        | 0.02   | (0.05, 0.05)     | -0.009 | 0.223 | 0.760        | -0.01     | (0.05, 0.04) |
| Q15172 | PP2R2A   | Q030150 | 192  | -0.003 | 0.013 | 0.803 | -3.22e-03 | (0.02, 0.03) | 0.940 | 0.608            | -0.008           | 0.226    | 0.807    | -0.01           | (0.06, 0.04)       | 0.001         | 0.694  | -0.002  | 0.224 | 0.929        | 0.02   | (0.05, 0.05)     | -0.009 | 0.223 | 0.760        | -0.01     | (0.05, 0.04) |
| Q15172 | PP2R2A   | Q030150 | 192  | -0.003 | 0.013 | 0.803 | -3.22e-03 | (0.02, 0.03) | 0.940 | 0.608            | -0.008           | 0.226    | 0.807    | -0.01           | (0.06, 0.04)       | 0.001         | 0.694  | -0.002  | 0.224 | 0.929        | 0.02   | (0.05, 0.05)     | -0.009 | 0.223 | 0.760        | -0.01     | (0.05, 0.04) |
| Q15172 | PP2R2A   | Q030150 | 192  | -0.003 | 0.013 | 0.803 | -3.22e-03 | (0.02, 0.03) | 0.940 | 0.608            | -0.008           | 0.226    | 0.807    | -0.01           | (0.06, 0.04)       | 0.001         | 0.694  | -0.002  | 0.224 | 0.929        | 0.02   | (0.05, 0.05)     | -0.009 | 0.223 | 0.760        | -0.01     | (0.05, 0.04) |
| Q15172 | PP2R2A   | Q030150 | 192  | -0.003 | 0.013 | 0.803 | -3.22e-03 | (0.02, 0.03) | 0.940 | 0.608            | -0.008           | 0.226    | 0.807    | -0.01           | (0.06, 0.04)       | 0.001         | 0.694  | -0.002  | 0.224 | 0.929        | 0.02   | (0.05, 0.05)     | -0.009 | 0.223 | 0.760        | -0.01     | (0.05, 0.04) |
| Q15172 | PP2R2A   | Q030150 | 192  | -0.003 | 0.013 | 0.803 | -3.22e-03 | (0.02, 0.03) | 0.940 | 0.608            | -0.008           | 0.226    | 0.807    | -0.01           | (0.06, 0.04)       | 0.001         | 0.694  | -0.002  | 0.224 | 0.929        | 0.02   | (0.05, 0.05)     | -0.009 | 0.223 | 0.760        | -0.01     | (0.05, 0.04) |
| Q15172 | PP2R2A   | Q030150 | 192  | -0.003 | 0.013 | 0.803 | -3.22e-03 | (0.02, 0.03) | 0.940 | 0.608            | -0.008           | 0.226    | 0.807    | -0.01           | (0.06, 0.04)       | 0.001         | 0.694  | -0.002  | 0.224 | 0.929        | 0.02   | (0.05, 0.05)     | -0.009 | 0.223 | 0.760        | -0.01     | (0.05, 0.04) |
| Q15172 | PP2R2A   | Q030150 | 192  | -0.003 | 0.013 | 0.803 | -3.22e-03 | (0.02, 0.03) | 0.940 | 0.608            | -0.008           | 0.226    | 0.807    | -0.01           | (0.06, 0.04)       | 0.001         | 0.694  | -0.002  | 0.224 | 0.929        | 0.02   | (0.05, 0.05)     | -0.009 | 0.223 | 0.760        | -0.01     | (0.05, 0.04) |
| Q15172 | PP2R2A   | Q030150 | 192  | -0.003 | 0.013 | 0.803 | -3.22e-03 | (0.02, 0.03) | 0.940 | 0.608            | -0.008           | 0.226    | 0.807    | -0.01           | (0.06, 0.04)       | 0.001         | 0.694  | -0.002  | 0.224 | 0.929        | 0.02   | (0.05, 0.05)     | -0.009 | 0.2   |              |           |              |

Table S4. Association of type 2 diabetes with UKB-PPP plasma protein.

| Protein | UnProt  | Gene      | OID | Inverse variance weighted |      |       |           | MR Egger     |         |          |         | Weighted median |        |       |        | Weighted mode |        |        |        |        |       |       |       |       |       |       |
|---------|---------|-----------|-----|---------------------------|------|-------|-----------|--------------|---------|----------|---------|-----------------|--------|-------|--------|---------------|--------|--------|--------|--------|-------|-------|-------|-------|-------|-------|
|         |         |           |     | nsp                       | b/w  | se    | ci_low    | ci_high      | FDR_low | ci_low   | ci_high | egger           | inter  | egger | preval | median        | preval | median | preval | median |       |       |       |       |       |       |
| 09J15   | TAGLN3  | LOC13225  | 192 | -0.002                    | 0.12 | 0.088 | -1.74e-03 | (0.02, 0.03) | 0.969   | 0.310    | 0.024   | 0.585           | 0.011  | 0.039 | 0.019  | 0.025         | 0.441  | 0.022  | 0.037  | 0.013  | 0.024 | 0.598 | 0.010 | 0.034 | 0.026 |       |
| 09K378  | GOLGA3  | LOC13226  | 192 | -0.002                    | 0.12 | 0.088 | -1.74e-03 | (0.02, 0.03) | 0.969   | 0.310    | 0.024   | 0.585           | 0.011  | 0.039 | 0.019  | 0.025         | 0.441  | 0.022  | 0.037  | 0.013  | 0.024 | 0.598 | 0.010 | 0.034 | 0.026 |       |
| 09K644  | MSLN1   | LOC13229  | 192 | -0.002                    | 0.12 | 0.088 | -1.74e-03 | (0.02, 0.03) | 0.969   | 0.310    | 0.024   | 0.585           | 0.011  | 0.039 | 0.019  | 0.025         | 0.441  | 0.022  | 0.037  | 0.013  | 0.024 | 0.598 | 0.010 | 0.034 | 0.026 |       |
| 09N763  | STAU1   | LOC13310  | 192 | -0.002                    | 0.12 | 0.088 | -1.74e-03 | (0.02, 0.03) | 0.969   | 0.310    | 0.024   | 0.585           | 0.011  | 0.039 | 0.019  | 0.025         | 0.441  | 0.022  | 0.037  | 0.013  | 0.024 | 0.598 | 0.010 | 0.034 | 0.026 |       |
| 09N783  | MICAL2L | LOC13311  | 192 | -0.002                    | 0.12 | 0.088 | -1.74e-03 | (0.02, 0.03) | 0.969   | 0.310    | 0.024   | 0.585           | 0.011  | 0.039 | 0.019  | 0.025         | 0.441  | 0.022  | 0.037  | 0.013  | 0.024 | 0.598 | 0.010 | 0.034 | 0.026 |       |
| 09A979  | SEC31A  | LOC13329  | 192 | -0.002                    | 0.12 | 0.088 | -1.74e-03 | (0.02, 0.03) | 0.970   | 0.003    | -0.006  | 0.283           | -0.001 | 0.008 | 0.005  | 0.004         | 0.002  | 0.002  | 0.002  | 0.002  | 0.002 | 0.002 | 0.002 | 0.002 | 0.002 | 0.002 |
| 09M270  | SH2     | LOC13330  | 192 | -0.002                    | 0.12 | 0.088 | -1.74e-03 | (0.02, 0.03) | 0.970   | 0.003    | -0.006  | 0.283           | -0.001 | 0.008 | 0.005  | 0.004         | 0.002  | 0.002  | 0.002  | 0.002  | 0.002 | 0.002 | 0.002 | 0.002 | 0.002 | 0.002 |
| 09K684  | KIRREL1 | LOC13331  | 192 | -0.002                    | 0.12 | 0.088 | -1.74e-03 | (0.02, 0.03) | 0.970   | 0.003    | -0.006  | 0.283           | -0.001 | 0.008 | 0.005  | 0.004         | 0.002  | 0.002  | 0.002  | 0.002  | 0.002 | 0.002 | 0.002 | 0.002 | 0.002 | 0.002 |
| 09B670  | ATP10V2 | LOC13332  | 192 | -0.002                    | 0.12 | 0.088 | -1.74e-03 | (0.02, 0.03) | 0.970   | 0.003    | -0.006  | 0.283           | -0.001 | 0.008 | 0.005  | 0.004         | 0.002  | 0.002  | 0.002  | 0.002  | 0.002 | 0.002 | 0.002 | 0.002 | 0.002 | 0.002 |
| 091225  | FRS3    | LOC13333  | 192 | -0.002                    | 0.12 | 0.088 | -1.74e-03 | (0.02, 0.03) | 0.970   | 0.003    | -0.006  | 0.283           | -0.001 | 0.008 | 0.005  | 0.004         | 0.002  | 0.002  | 0.002  | 0.002  | 0.002 | 0.002 | 0.002 | 0.002 | 0.002 | 0.002 |
| 09S110  | HMPV2   | LOC13334  | 192 | -0.002                    | 0.12 | 0.088 | -1.74e-03 | (0.02, 0.03) | 0.970   | 0.003    | -0.006  | 0.283           | -0.001 | 0.008 | 0.005  | 0.004         | 0.002  | 0.002  | 0.002  | 0.002  | 0.002 | 0.002 | 0.002 | 0.002 | 0.002 | 0.002 |
| 09JUA7  | L3CA    | LOC13342  | 192 | -0.002                    | 0.12 | 0.088 | -1.74e-03 | (0.02, 0.03) | 0.970   | 0.003    | -0.006  | 0.283           | -0.001 | 0.008 | 0.005  | 0.004         | 0.002  | 0.002  | 0.002  | 0.002  | 0.002 | 0.002 | 0.002 | 0.002 | 0.002 | 0.002 |
| 09K009  | OTL07B  | LOC13344  | 192 | -0.002                    | 0.12 | 0.088 | -1.74e-03 | (0.02, 0.03) | 0.970   | 0.003    | -0.006  | 0.283           | -0.001 | 0.008 | 0.005  | 0.004         | 0.002  | 0.002  | 0.002  | 0.002  | 0.002 | 0.002 | 0.002 | 0.002 | 0.002 | 0.002 |
| 04A363  | PSCA    | LOC13347  | 192 | -0.001                    | 0.10 | 0.092 | -1.34e-03 | (0.02, 0.02) | 0.970   | 7.73E-16 | 0.005   | 0.199           | 0.001  | 0.003 | 0.004  | 0.001         | 0.002  | 0.002  | 0.002  | 0.002  | 0.002 | 0.002 | 0.002 | 0.002 | 0.002 | 0.002 |
| 09S223  | SEPTIN8 | LOC13348  | 192 | -0.002                    | 0.12 | 0.088 | -1.74e-03 | (0.02, 0.03) | 0.970   | 0.003    | -0.006  | 0.283           | -0.001 | 0.008 | 0.005  | 0.004         | 0.002  | 0.002  | 0.002  | 0.002  | 0.002 | 0.002 | 0.002 | 0.002 | 0.002 | 0.002 |
| 09KX55  | DNAJC5  | LOC13347  | 192 | -0.002                    | 0.12 | 0.088 | -1.74e-03 | (0.02, 0.03) | 0.970   | 0.003    | -0.006  | 0.283           | -0.001 | 0.008 | 0.005  | 0.004         | 0.002  | 0.002  | 0.002  | 0.002  | 0.002 | 0.002 | 0.002 | 0.002 | 0.002 | 0.002 |
| 09V778  | GIGZF   | LOC13362  | 192 | -0.002                    | 0.12 | 0.088 | -1.74e-03 | (0.02, 0.03) | 0.970   | 0.003    | -0.006  | 0.283           | -0.001 | 0.008 | 0.005  | 0.004         | 0.002  | 0.002  | 0.002  | 0.002  | 0.002 | 0.002 | 0.002 | 0.002 | 0.002 | 0.002 |
| 09B841  | DNAJL2  | LOC13363  | 192 | -0.001                    | 0.10 | 0.092 | -1.34e-03 | (0.02, 0.02) | 0.971   | 0.003    | -0.006  | 0.283           | -0.001 | 0.008 | 0.005  | 0.004         | 0.002  | 0.002  | 0.002  | 0.002  | 0.002 | 0.002 | 0.002 | 0.002 | 0.002 | 0.002 |
| 09B674  | GICF1   | LOC13364  | 192 | -0.002                    | 0.12 | 0.088 | -1.74e-03 | (0.02, 0.03) | 0.971   | 7.44E-47 | 0.000   | 0.386           | 0.001  | 0.003 | 0.004  | 0.001         | 0.002  | 0.002  | 0.002  | 0.002  | 0.002 | 0.002 | 0.002 | 0.002 | 0.002 | 0.002 |
| 09I268  | DIS3    | LOC13460  | 192 | -0.002                    | 0.12 | 0.088 | -1.74e-03 | (0.02, 0.03) | 0.971   | 1.20E-04 | 0.027   | 0.280           | 0.003  | 0.008 | 0.002  | 0.002         | 0.002  | 0.002  | 0.002  | 0.002  | 0.002 | 0.002 | 0.002 | 0.002 | 0.002 | 0.002 |
| 09WVW3  | PFB1    | LOC13461  | 192 | -0.002                    | 0.12 | 0.088 | -1.74e-03 | (0.02, 0.03) | 0.971   | 2.00E-07 | 0.007   | 0.296           | 0.003  | 0.008 | 0.002  | 0.002         | 0.002  | 0.002  | 0.002  | 0.002  | 0.002 | 0.002 | 0.002 | 0.002 | 0.002 | 0.002 |
| 09B729  | RNKG    | LOC13474  | 192 | -0.002                    | 0.12 | 0.088 | -1.74e-03 | (0.02, 0.03) | 0.971   | 9.31E-23 | 0.035   | 0.300           | 0.003  | 0.008 | 0.002  | 0.002         | 0.002  | 0.002  | 0.002  | 0.002  | 0.002 | 0.002 | 0.002 | 0.002 | 0.002 | 0.002 |
| 09B292  | SLC13A1 | LOC13475  | 192 | -0.002                    | 0.12 | 0.088 | -1.74e-03 | (0.02, 0.03) | 0.971   | 0.000    | 0.005   | 0.285           | 0.001  | 0.004 | 0.005  | 0.001         | 0.002  | 0.002  | 0.002  | 0.002  | 0.002 | 0.002 | 0.002 | 0.002 | 0.002 | 0.002 |
| 09K749  | SNK2    | LOC133174 | 192 | -0.002                    | 0.12 | 0.088 | -1.74e-03 | (0.02, 0.03) | 0.971   | 0.016    | -0.008  | 0.268           | 0.002  | 0.003 | 0.001  | 0.002         | 0.002  | 0.002  | 0.002  | 0.002  | 0.002 | 0.002 | 0.002 | 0.002 | 0.002 | 0.002 |
| 09H9P3  | USP28   | LOC13428  | 192 | -0.002                    | 0.12 | 0.088 | -1.74e-03 | (0.02, 0.03) | 0.971   | 0.040    | -0.007  | 0.284           | 0.002  | 0.003 | 0.001  | 0.002         | 0.002  | 0.002  | 0.002  | 0.002  | 0.002 | 0.002 | 0.002 | 0.002 | 0.002 | 0.002 |
| 09K444  | L34     | LOC13398  | 192 | -0.001                    | 0.10 | 0.092 | -1.34e-03 | (0.02, 0.02) | 0.971   | 0.053    | 0.017   | 0.300           | 0.002  | 0.003 | 0.004  | 0.001         | 0.002  | 0.002  | 0.002  | 0.002  | 0.002 | 0.002 | 0.002 | 0.002 | 0.002 | 0.002 |
| 09S155  | OSGEP   | LOC13376  | 192 | -0.002                    | 0.12 | 0.088 | -1.74e-03 | (0.02, 0.03) | 0.971   | 2.07E-05 | 0.028   | 0.282           | 0.003  | 0.008 | 0.002  | 0.002         | 0.002  | 0.002  | 0.002  | 0.002  | 0.002 | 0.002 | 0.002 | 0.002 | 0.002 | 0.002 |
| 09I268  | DIS3    | LOC13460  | 192 | -0.002                    | 0.12 | 0.088 | -1.74e-03 | (0.02, 0.03) | 0.972   | 0.124    | 0.012   | 0.325           | 0.003  | 0.008 | 0.002  | 0.002         | 0.002  | 0.002  | 0.002  | 0.002  | 0.002 | 0.002 | 0.002 | 0.002 | 0.002 | 0.002 |
| 09I276  | TRIOH   | LOC13462  | 192 | -0.002                    | 0.12 | 0.088 | -1.74e-03 | (0.02, 0.03) | 0.972   | 2.34E-05 | 0.007   | 0.287           | 0.003  | 0.008 | 0.002  | 0.002         | 0.002  | 0.002  | 0.002  | 0.002  | 0.002 | 0.002 | 0.002 | 0.002 | 0.002 | 0.002 |
| 09I705  | ENPEP   | LOC13315  | 192 | -0.002                    | 0.12 | 0.088 | -1.74e-03 | (0.02, 0.03) | 0.972   | 0.107    | 0.009   | 0.323           | 0.003  | 0.008 | 0.002  | 0.002         | 0.002  | 0.002  | 0.002  | 0.002  | 0.002 | 0.002 | 0.002 | 0.002 | 0.002 | 0.002 |
| 09I505  | RDI1    | LOC13393  | 192 | -0.002                    | 0.12 | 0.088 | -1.74e-03 | (0.02, 0.03) | 0.972   | 0.003    | -0.006  | 0.283           | -0.001 | 0.008 | 0.005  | 0.004         | 0.002  | 0.002  | 0.002  | 0.002  | 0.002 | 0.002 | 0.002 | 0.002 | 0.002 | 0.002 |
| 09I505  | RDI1    | LOC13393  | 192 | -0.002                    | 0.12 | 0.088 | -1.74e-03 | (0.02, 0.03) | 0.972   | 0.003    | -0.006  | 0.283           | -0.001 | 0.008 | 0.005  | 0.004         | 0.002  | 0.002  | 0.002  | 0.002  | 0.002 | 0.002 | 0.002 | 0.002 | 0.002 | 0.002 |
| 09I505  | RDI1    | LOC13393  | 192 | -0.002                    | 0.12 | 0.088 | -1.74e-03 | (0.02, 0.03) | 0.972   | 0.003    | -0.006  | 0.283           | -0.001 | 0.008 | 0.005  | 0.004         | 0.002  | 0.002  | 0.002  | 0.002  | 0.002 | 0.002 | 0.002 | 0.002 | 0.002 | 0.002 |
| 09I505  | RDI1    | LOC13393  | 192 | -0.002                    | 0.12 | 0.088 | -1.74e-03 | (0.02, 0.03) | 0.972   | 0.003    | -0.006  | 0.283           | -0.001 | 0.008 | 0.005  | 0.004         | 0.002  | 0.002  | 0.002  | 0.002  | 0.002 | 0.002 | 0.002 | 0.002 | 0.002 | 0.002 |
| 09I505  | RDI1    | LOC13393  | 192 | -0.002                    | 0.12 | 0.088 | -1.74e-03 | (0.02, 0.03) | 0.972   | 0.003    | -0.006  | 0.283           | -0.001 | 0.008 | 0.005  | 0.004         | 0.002  | 0.002  | 0.002  | 0.002  | 0.002 | 0.002 | 0.002 | 0.002 | 0.002 | 0.002 |
| 09I505  | RDI1    | LOC13393  | 192 | -0.002                    | 0.12 | 0.088 | -1.74e-03 | (0.02, 0.03) | 0.972   | 0.003    | -0.006  | 0.283           | -0.001 | 0.008 | 0.005  | 0.004         | 0.002  | 0.002  | 0.002  | 0.002  | 0.002 | 0.002 | 0.002 | 0.002 | 0.002 | 0.002 |
| 09I505  | RDI1    | LOC13393  | 192 | -0.002                    | 0.12 | 0.088 | -1.74e-03 | (0.02, 0.03) | 0.972   | 0.003    | -0.006  | 0.283           | -0.001 | 0.008 | 0.005  | 0.004         | 0.002  | 0.002  | 0.002  | 0.002  | 0.002 | 0.002 | 0.002 | 0.002 | 0.002 | 0.002 |
| 09I505  | RDI1    | LOC13393  | 192 | -0.002                    | 0.12 | 0.088 | -1.74e-03 | (0.02, 0.03) | 0.972   | 0.003    | -0.006  | 0.283           | -0.001 | 0.008 | 0.005  | 0.004         | 0.002  | 0.002  | 0.002  | 0.002  | 0.002 | 0.002 | 0.002 | 0.002 | 0.002 | 0.002 |
| 09I505  | RDI1    | LOC13393  | 192 | -0.002                    | 0.12 | 0.088 | -1.74e-03 | (0.02, 0.03) | 0.972   | 0.003    | -0.006  | 0.283           | -0.001 | 0.008 | 0.005  | 0.004         | 0.002  | 0.002  | 0.002  | 0.002  | 0.002 | 0.002 | 0.002 | 0.002 | 0.002 | 0.002 |
| 09I505  | RDI1    | LOC13393  | 192 |                           |      |       |           |              |         |          |         |                 |        |       |        |               |        |        |        |        |       |       |       |       |       |       |

Table S4. Association of type 2 diabetes with UKB-PPP plasma protein.

| Protein | Gene      | OID     | Inverse variance weighted |                  |                   |                   | MR Egger           |              |                    |                     | Weighted median        |                     |          |          |               |                       |                      |                         |                      |                   |                    |                       |                    |       |       |           |                  |
|---------|-----------|---------|---------------------------|------------------|-------------------|-------------------|--------------------|--------------|--------------------|---------------------|------------------------|---------------------|----------|----------|---------------|-----------------------|----------------------|-------------------------|----------------------|-------------------|--------------------|-----------------------|--------------------|-------|-------|-----------|------------------|
|         |           |         | n SNP                     | b <sub>IVW</sub> | se <sub>IVW</sub> | CI <sub>IVW</sub> | FDR <sub>IVW</sub> | Q            | p <sub>egger</sub> | se <sub>egger</sub> | p <sub>val</sub> egger | CI <sub>egger</sub> | egger    | Inte     | egger         | val <sub>median</sub> | se <sub>median</sub> | p <sub>val</sub> median | CI <sub>median</sub> | b <sub>mode</sub> | se <sub>mode</sub> | p <sub>val</sub> mode | CI <sub>mode</sub> |       |       |           |                  |
| D9Y275  | TNFSF18B  | OD20272 | 192                       | 0.000            | 0.013             | 0.975             | 4.09e-04           | (0.03, 0.03) | 0.995              | 9.04E-05            | -0.038                 | 0.025               | 0.133    | 0.04     | (-0.09, 0.01) | 0.002                 | 0.076                | 0.011                   | 0.622                | 0.624             | 0.01               | (0.03, 0.05)          | 0.002              | 0.025 | 0.936 | 1.99e-03  | (0.05, 0.05)     |
| P22033  | MMKIT     | OD30159 | 192                       | 0.000            | 0.014             | 0.976             | 4.22e-04           | (0.03, 0.03) | 0.995              | 0.003               | -0.022                 | 0.027               | 0.419    | 0.02     | (0.07, 0.03)  | 0.001                 | 0.355                | -0.025                  | 0.624                | 0.284             | -0.03              | (0.07, 0.02)          | 0.001              | 0.024 | 0.385 | -0.02     | (0.07, 0.03)     |
| D8YVW5  | RNF168    | OD30506 | 192                       | 0.000            | 0.012             | 0.977             | 3.51e-04           | (0.02, 0.02) | 0.996              | 0.496               | -0.001                 | 0.023               | 0.951    | 1.45e-03 | (-0.05, 0.04) | 0.000                 | 0.956                | -0.011                  | 0.622                | 0.607             | -0.01              | (0.05, 0.03)          | -0.006             | 0.023 | 0.810 | -0.01     | (-0.05, 0.04)    |
| D00273  | DFFA      | OD20620 | 192                       | 0.000            | 0.013             | 0.977             | 3.70e-04           | (0.03, 0.03) | 0.996              | 0.013               | 0.004                  | 0.025               | 0.881    | 0.79e-03 | (0.05, 0.05)  | 0.000                 | 0.848                | 0.011                   | 0.622                | 0.611             | 0.01               | (0.03, 0.05)          | -0.009             | 0.023 | 0.700 | -0.01     | (-0.05, 0.04)    |
| P41166  | CAT       | OD31265 | 192                       | 0.000            | 0.012             | 0.978             | 3.33e-04           | (0.02, 0.02) | 0.996              | 0.380               | -0.026                 | 0.024               | 0.265    | 0.03     | (0.07, 0.02)  | 0.002                 | 0.199                | -0.021                  | 0.622                | 0.342             | -0.02              | (0.05, 0.02)          | -0.010             | 0.028 | 0.696 | -0.01     | (-0.05, 0.04)    |
| P04179  | SOD2      | OD20114 | 192                       | 0.000            | 0.016             | 0.978             | 4.50e-04           | (0.03, 0.03) | 0.996              | 2.52E-16            | -0.024                 | 0.032               | 0.451    | -0.02    | (0.09, 0.04)  | 0.001                 | 0.388                | -0.018                  | 0.624                | 0.502             | -0.02              | (0.06, 0.03)          | -0.036             | 0.025 | 0.153 | -0.04     | (-0.08, 0.01)    |
| D01007  | BRN1E1    | OD30347 | 192                       | 0.000            | 0.012             | 0.979             | 3.19e-04           | (0.02, 0.02) | 0.996              | 0.271               | -0.019                 | 0.024               | 0.444    | 0.02     | (0.07, 0.03)  | 0.001                 | 0.380                | 0.008                   | 0.623                | 0.725             | 0.01               | (0.04, 0.05)          | 0.001              | 0.023 | 0.950 | 1.45e-03  | (0.04, 0.04)     |
| Q07AE3  | GAD45GPI1 | OD30237 | 192                       | 0.000            | 0.015             | 0.979             | 3.52e-04           | (0.03, 0.03) | 0.996              | 4.81E-06            | -0.022                 | 0.029               | 0.447    | -0.02    | (-0.08, 0.03) | 0.001                 | 0.384                | -0.021                  | 0.624                | 0.378             | -0.02              | (0.07, 0.03)          | -0.024             | 0.022 | 0.295 | -0.02     | (-0.07, 0.02)    |
| Q12287  | NMI       | OD30178 | 192                       | 0.000            | 0.013             | 0.980             | 3.55e-04           | (0.03, 0.03) | 0.996              | 3.98E-04            | 0.019                  | 0.026               | 0.467    | 0.02     | (0.03, 0.07)  | -0.001                | 0.405                | 0.023                   | 0.622                | 0.284             | 0.02               | (0.02, 0.07)          | 0.005              | 0.023 | 0.825 | 0.01      | (0.04, 0.05)     |
| D8A248  | PKP1      | OD30221 | 192                       | 0.000            | 0.014             | 0.980             | 3.53e-04           | (0.03, 0.03) | 0.996              | 2.37E-09            | -0.031                 | 0.028               | 0.260    | -0.03    | (-0.09, 0.02) | 0.002                 | 0.194                | -0.032                  | 0.624                | 0.173             | -0.03              | (0.04, 0.01)          | -0.036             | 0.026 | 0.172 | -0.04     | (-0.08, 0.01)    |
| P19957  | P13       | OD20326 | 192                       | 0.000            | 0.011             | 0.980             | 2.77e-04           | (0.02, 0.02) | 0.996              | 0.104               | 0.005                  | 0.023               | 0.818    | 0.01     | (0.04, 0.05)  | 0.000                 | 0.799                | 0.015                   | 0.623                | 0.519             | 0.01               | (0.03, 0.06)          | 0.016              | 0.023 | 0.484 | 0.02      | (0.03, 0.06)     |
| D2L426  | PRSS35    | OD30193 | 192                       | 0.000            | 0.012             | 0.979             | 3.03e-04           | (0.02, 0.02) | 0.996              | 3.23E-09            | 0.002                  | 0.023               | 0.938    | 1.74e-03 | (0.04, 0.05)  | 0.000                 | 0.944                | 0.006                   | 0.618                | 0.758             | 0.01               | (0.03, 0.04)          | -0.004             | 0.019 | 0.825 | 4.27e-03  | (0.03, 0.04)     |
| P53814  | SMTN      | OD30154 | 192                       | 0.000            | 0.013             | 0.980             | 3.11e-04           | (0.03, 0.03) | 0.996              | 0.019               | -0.011                 | 0.025               | 0.668    | 0.01     | (0.06, 0.04)  | 0.001                 | 0.627                | -0.003                  | 0.624                | 0.890             | -3.37e-03          | (0.05, 0.04)          | -0.014             | 0.024 | 0.547 | -0.01     | (-0.06, 0.03)    |
| P62072  | TMEM10    | OD30358 | 192                       | 0.000            | 0.013             | 0.981             | 3.14e-04           | (0.03, 0.03) | 0.997              | 0.005               | -0.035                 | 0.026               | 0.171    | -0.04    | (-0.09, 0.02) | 0.002                 | 0.114                | -0.026                  | 0.624                | 0.290             | -0.03              | (0.07, 0.02)          | -0.032             | 0.024 | 0.176 | -0.03     | (-0.08, 0.01)    |
| P33419  | MMT1      | OD31021 | 192                       | 0.000            | 0.013             | 0.983             | 2.84e-04           | (0.03, 0.03) | 0.997              | 0.025               | -0.022                 | 0.025               | 0.951    | 1.57e-03 | (-0.05, 0.05) | 0.000                 | 0.932                | 0.014                   | 0.624                | 0.961             | 0.01               | (0.03, 0.06)          | 0.000              | 0.023 | 0.991 | 2.77e-04  | (0.05, 0.05)     |
| Q07D43  | PTPRH     | OD31433 | 192                       | 0.000            | 0.018             | 0.983             | 3.82e-04           | (0.03, 0.03) | 0.997              | 2.73E-39            | 0.017                  | 0.034               | 0.615    | 0.02     | (0.05, 0.08)  | -0.001                | 0.565                | -0.009                  | 0.621                | 0.671             | -0.01              | (0.05, 0.03)          | -0.014             | 0.022 | 0.538 | -0.01     | (-0.06, 0.03)    |
| Q07204  | THBD      | OD20231 | 192                       | 0.000            | 0.020             | 0.982             | 4.40e-04           | (0.04, 0.04) | 0.997              | 5.75E-45            | -0.037                 | 0.038               | 0.344    | -0.04    | (-0.11, 0.04) | 0.002                 | 0.284                | -0.001                  | 0.622                | 0.974             | -7.21e-04          | (0.04, 0.04)          | -0.009             | 0.022 | 0.671 | -0.01     | (-0.05, 0.03)    |
| P21964  | COMT      | OD20086 | 192                       | 0.000            | 0.013             | 0.984             | 2.61e-04           | (0.03, 0.03) | 0.998              | 0.012               | -0.007                 | 0.025               | 0.787    | 0.01     | (0.05, 0.04)  | 0.000                 | 0.762                | -0.002                  | 0.622                | 0.911             | -2.48e-03          | (0.05, 0.04)          | -0.002             | 0.023 | 0.929 | -2.06e-03 | (0.05, 0.04)     |
| D56F21  | BRDT      | OD30179 | 192                       | 0.000            | 0.018             | 0.984             | 3.49e-04           | (0.03, 0.03) | 0.998              | 3.99E-18            | -0.012                 | 0.034               | 0.715    | -0.01    | (-0.08, 0.05) | 0.001                 | 0.678                | -0.029                  | 0.621                | 1.164             | -0.03              | (0.07, 0.01)          | -0.020             | 0.024 | 0.407 | -0.02     | (-0.07, 0.03)    |
| P47674  | OMP       | OD30385 | 192                       | 0.000            | 0.012             | 0.984             | 2.38e-04           | (0.02, 0.02) | 0.998              | 0.216               | 0.004                  | 0.024               | 0.163    | 0.03     | (0.01, 0.08)  | -0.002                | 0.105                | 0.031                   | 0.622                | 0.169             | 0.03               | (0.02, 0.07)          | 0.001              | 0.025 | 0.208 | 0.03      | (0.02, 0.08)     |
| P05543  | CNP       | OD30285 | 192                       | 0.000            | 0.013             | 0.985             | 2.59e-04           | (0.03, 0.03) | 0.998              | 0.007               | -0.007                 | 0.026               | 0.783    | 0.01     | (0.06, 0.04)  | 0.000                 | 0.738                | -0.008                  | 0.625                | 0.737             | -0.01              | (0.06, 0.04)          | -0.014             | 0.024 | 0.547 | -0.01     | (-0.06, 0.03)    |
| D98W61  | DDA1      | OD30126 | 192                       | 0.000            | 0.012             | 0.985             | 2.27e-04           | (0.02, 0.02) | 0.998              | 0.783               | -0.021                 | 0.023               | 0.369    | -0.02    | (-0.07, 0.02) | 0.001                 | 0.300                | -0.017                  | 0.622                | 0.425             | -0.02              | (0.06, 0.03)          | -0.019             | 0.024 | 0.430 | -0.02     | (-0.07, 0.03)    |
| P05519  | ABL1      | OD21280 | 192                       | 0.000            | 0.013             | 0.989             | 1.78e-04           | (0.03, 0.03) | 0.998              | 0.003               | -0.038                 | 0.026               | 0.128    | -0.04    | (-0.09, 0.01) | 0.002                 | 0.077                | -0.029                  | 0.623                | 0.222             | -0.03              | (0.07, 0.02)          | -0.033             | 0.023 | 0.140 | -0.03     | (-0.08, 0.01)    |
| Q07E58  | ADAMTS15  | OD21275 | 192                       | 0.000            | 0.015             | 0.989             | 1.22e-04           | (0.03, 0.03) | 0.998              | 4.89E-07            | -0.103                 | 0.027               | 2.31E-04 | 0.10     | (-0.16, 0.05) | 0.000                 | 0.962                | -0.003                  | 0.625                | 1.145             | -0.04              | (0.05, 0.01)          | -0.040             | 0.023 | 0.084 | -0.04     | (-0.09, 0.01)    |
| P54819  | AK2       | OD31142 | 192                       | 0.000            | 0.013             | 0.987             | 2.17e-04           | (0.03, 0.03) | 0.998              | 0.005               | -0.007                 | 0.026               | 0.795    | 0.01     | (0.06, 0.04)  | 0.000                 | 0.754                | -0.012                  | 0.624                | 0.603             | -0.01              | (0.06, 0.03)          | -0.018             | 0.023 | 0.443 | -0.02     | (-0.06, 0.03)    |
| D6LXK1  | CRELD2    | OD20075 | 192                       | 0.000            | 0.014             | 0.988             | 2.35e-04           | (0.03, 0.03) | 0.998              | 3.59E-06            | -0.034                 | 0.026               | 0.207    | -0.03    | (-0.08, 0.02) | 0.002                 | 0.139                | -0.023                  | 0.621                | 0.290             | -0.02              | (0.06, 0.03)          | -0.023             | 0.022 | 0.291 | -0.02     | (-0.07, 0.02)    |
| D43102  | EIF4G3    | OD31022 | 192                       | 0.000            | 0.013             | 0.989             | 1.81e-04           | (0.02, 0.02) | 0.998              | 0.037               | -0.029                 | 0.025               | 0.242    | -0.03    | (-0.08, 0.02) | 0.002                 | 0.170                | -0.012                  | 0.623                | 0.474             | -0.02              | (0.06, 0.03)          | -0.025             | 0.024 | 0.293 | -0.03     | (-0.07, 0.02)    |
| P55010  | EIF5      | OD30156 | 192                       | 0.000            | 0.012             | 0.989             | 1.75e-04           | (0.02, 0.02) | 0.998              | 0.644               | -0.023                 | 0.023               | 0.328    | -0.02    | (-0.07, 0.02) | 0.001                 | 0.254                | -0.022                  | 0.624                | 0.363             | -0.02              | (0.07, 0.03)          | -0.033             | 0.023 | 0.184 | -0.03     | (-0.08, 0.01)    |
| D14964  | HIS5      | OD21176 | 192                       | 0.000            | 0.014             | 0.987             | 2.31e-04           | (0.03, 0.03) | 0.998              | 0.002               | 0.018                  | 0.027               | 0.489    | 0.02     | (0.03, 0.07)  | 0.001                 | 0.424                | 0.015                   | 0.624                | 0.540             | 0.01               | (0.03, 0.06)          | 0.006              | 0.025 | 0.815 | 0.01      | (0.04, 0.05)     |
| P22304  | DIS       | OD20819 | 192                       | 0.000            | 0.014             | 0.988             | 2.39e-04           | (0.03, 0.03) | 0.998              | 3.75E-04            | 0.073                  | 0.026               | 0.037    | 0.07     | (0.02, 0.12)  | 0.005                 | 0.001                | 0.046                   | 0.621                | 0.031             | 0.05               | (0.04e-03, 0.09)      | 0.044              | 0.024 | 0.083 | 0.04      | (2.11e-03, 0.09) |
| P05372  | LYPLAL2   | OD30817 | 192                       | 0.000            | 0.012             | 0.989             | 1.87e-04           | (0.02, 0.02) | 0.998              | 0.320               | -0.002                 | 0.024               | 0.943    | 1.73e-03 | (-0.05, 0.05) | 0.000                 | 0.927                | 0.013                   | 0.624                | 0.587             | 0.01               | (0.03, 0.06)          | 0.017              | 0.025 | 0.496 | 0.02      | (0.03, 0.07)     |
| P54727  | RAD23B    | OD21166 | 192                       | 0.000            | 0.014             | 0.989             | 1.82e-04           | (0.03, 0.03) | 0.998              | 0.005               | -0.001                 | 0.026               | 0.972    | 0.34e-04 | (-0.05, 0.05) | 0.000                 | 0.960                | 0.001                   | 0.625                | 0.997             | 1.04e-03           | (-0.05, 0.05)         | -0.014             | 0.023 | 0.550 | -0.01     | (-0.06, 0.03)    |
| P04808  | RLN1      | OD30995 | 192                       | 0.000            | 0.012             | 0.989             | 1.60e-04           | (0.02, 0.02) | 0.998              | 0.006               | -0.018                 | 0.024               | 0.458    | -0.02    | (-0.07, 0.03) | 0.001                 | 0.382                | -0.000                  | 0.624                | 0.998             | 1.17e-04           | (-0.05, 0.05)         | -0.002             | 0.023 | 0.922 | -2.23e-03 | (-0.05, 0.05)    |
| D9H8E7  | VCPMT1    | OD31176 | 192                       | 0.000            | 0.014             | 0.989             | 1.85e-04           | (0.03, 0.03) | 0.998              | 0.003               | 0.026                  | 0.027               | 0.335    | 0.03     | (0.03, 0.08)  | 0.002                 | 0.264                | 0.005                   | 0.624                | 0.837             | 0.01               | (0.04, 0.05)          | 0.014              | 0.023 | 0.553 | 0.01      | (0.03, 0.06)     |
| D6NXT1  | ANKRD54   | OD21162 | 192                       | 0.000            | 0.013             | 0.994             | 9.36e-05           | (0.02, 0.02) | 0.999              | 0.045               | 0.022                  | 0.025               | 0.831    | 0.02     | (0.03, 0.07)  | -0.001                | 0.288                | 0.020                   | 0.623                | 0.387             | 0.02               | (0.03, 0.07)          | 0.015              | 0.023 | 0.528 | 0.01      | (0.03, 0.06)     |
| D9HEU7  | C10AL11C1 | OD30180 | 192                       | 0.000            | 0.012             | 0.992             | 1.19e-04           | (0.02, 0.02) | 0.999              | 0.473               | -0.027                 | 0.023               | 0.252    | -0.03    | (-0.07,       |                       |                      |                         |                      |                   |                    |                       |                    |       |       |           |                  |

Table S5. Association of type 2 diabetes with Finnish plasma protein.

| SomaLogic Gene | Protein | nsnp        | Inverse variance weighted |        |          | MR Egger             |                      |          | Weighted median |        |           | Weighted mode |           |        |                                 |                                      |                                |                                  |                                |
|----------------|---------|-------------|---------------------------|--------|----------|----------------------|----------------------|----------|-----------------|--------|-----------|---------------|-----------|--------|---------------------------------|--------------------------------------|--------------------------------|----------------------------------|--------------------------------|
|                |         |             | b/w                       | se/w   | p/w      | CI/w                 | FDR_ZW               | Q        | pval            | egger  | intercept | se/median     | se/plasma | b/mode | se/mode                         | se/CI/mode                           |                                |                                  |                                |
| 12730_30       | APDF    | 236         | -0.132                    | 0.022  | 2.29E-09 | -0.13 (-0.18, -0.09) | 1.05E-05             | 0.001    | -0.057          | 0.044  | 0.032     | 0.168         | 0.028     | 0.028  | -0.10 (-0.19, -0.01)            |                                      |                                |                                  |                                |
| 12732_38       | PCBP    | 236         | 0.127                     | 0.022  | 3.32E-09 | 0.13 (0.08, 0.18)    | 1.05E-05             | 0.001    | 0.103           | 0.044  | 0.032     | 0.168         | 0.028     | 0.028  | 0.10 (0.02, 0.18)               |                                      |                                |                                  |                                |
| 8469_41        | IGFBP2  | 236         | -0.140                    | 0.024  | 4.42E-09 | -0.14 (-0.19, -0.09) | 1.05E-05             | 1.84E-07 | -0.035          | 0.048  | 0.041     | 0.041         | -0.111    | 0.033  | 0.001 -0.11 (-0.16, -0.06)      |                                      |                                |                                  |                                |
| 4763_31        | AFM     | 236         | 0.109                     | 0.019  | 1.72E-08 | 0.11 (0.07, 0.15)    | 2.14E-05             | 0.114    | 0.077           | 0.041  | 0.060     | 0.080         | 0.283     | 0.048  | 0.040 0.283 (0.08, 0.41)        |                                      |                                |                                  |                                |
| 2948_58        | GHR     | 236         | 0.095                     | 0.019  | 1.52E-08 | 0.09 (0.05, 0.13)    | 2.14E-05             | 0.073    | 0.047           | 0.041  | 0.060     | 0.080         | 0.283     | 0.048  | 0.040 0.283 (0.08, 0.41)        |                                      |                                |                                  |                                |
| 10665_19       | SLTRK3  | SLK3        | 236                       | -0.123 | 0.024    | 2.46E-07             | -0.12 (-0.17, -0.07) | 2.04E-04 | 1.53E-08        | 0.027  | 0.047     | 0.571         | 0.033     | -0.077 | 0.012                           | -0.077 0.033 (-0.12, 0.01)           |                                |                                  |                                |
| 8408_2         | INHBC   | NHBC        | 236                       | 0.090  | 0.019    | 2.11E-08             | 0.09 (0.05, 0.13)    | 0.001    | 1.99E-011       | 0.039  | 0.070     | 0.013         | 0.077     | 0.012  | 0.034 0.060 0.060 (-0.07, 0.05) |                                      |                                |                                  |                                |
| 8007_19        | CTSB    | CTBP        | 236                       | 0.090  | 0.019    | 2.11E-08             | 0.09 (0.05, 0.13)    | 0.001    | 1.99E-011       | 0.039  | 0.070     | 0.013         | 0.077     | 0.012  | 0.034 0.060 0.060 (-0.07, 0.05) |                                      |                                |                                  |                                |
| 17386_23       | ADH1A   | ADH1A       | 236                       | 0.104  | 0.022    | 3.61E-06             | 0.10 (0.06, 0.15)    | 0.002    | 3.03E-05        | 0.001  | 0.045     | 0.180         | 0.060     | -0.033 | 0.15                            | 0.057                                | 0.038 0.137 (0.06, 0.21)       |                                  |                                |
| 3708_62        | ADM2    | ADM2        | 236                       | -0.084 | 0.018    | 3.91E-08             | -0.08 (-0.12, -0.05) | 0.002    | 3.03E-05        | 0.001  | 0.045     | 0.180         | 0.060     | -0.033 | 0.15                            | 0.057                                | 0.038 0.137 (0.06, 0.21)       |                                  |                                |
| 15592_24       | GUSB    | BCU1        | 236                       | 0.097  | 0.020    | 1.52E-08             | 0.09 (0.05, 0.13)    | 0.002    | 3.03E-05        | 0.001  | 0.045     | 0.180         | 0.060     | -0.033 | 0.15                            | 0.057                                | 0.038 0.137 (0.06, 0.21)       |                                  |                                |
| 8325_37        | ADH4    | ADH4        | 236                       | 0.099  | 0.022    | 8.85E-06             | 0.10 (0.06, 0.14)    | 0.003    | 8.29E-06        | 0.059  | 0.044     | 0.180         | 0.060     | -0.033 | 0.15                            | 0.057                                | 0.038 0.137 (0.06, 0.21)       |                                  |                                |
| 8337_65        | PTFR    | PTFR        | 236                       | 0.083  | 0.019    | 2.72E-08             | 0.08 (0.05, 0.12)    | 0.003    | 2.96E-06        | 0.059  | 0.044     | 0.180         | 0.060     | -0.033 | 0.15                            | 0.057                                | 0.038 0.137 (0.06, 0.21)       |                                  |                                |
| 3554_24        | ADPOD   | Adiponectin | 236                       | -0.100 | 0.024    | 1.06E-05             | -0.10 (-0.14, -0.06) | 0.004    | 1.64E-11        | 0.022  | 0.045     | 0.612         | 0.022     | 0.045  | 0.029                           | 0.114 -0.05 (-0.10, 0.01)            |                                |                                  |                                |
| 3343_1         | ACY1    | Ameyasyl    | 236                       | 0.091  | 0.021    | 1.35E-05             | 0.09 (0.05, 0.13)    | 0.004    | 2.80E-05        | 0.094  | 0.042     | 0.227         | 0.080     | 0.118  | 0.039                           | 0.039 0.079 0.035 (0.02, 0.01, 0.15) |                                |                                  |                                |
| 9416_37        | CPIR    | CPIR        | 236                       | 0.091  | 0.021    | 1.35E-05             | 0.09 (0.05, 0.13)    | 0.004    | 2.80E-05        | 0.094  | 0.042     | 0.227         | 0.080     | 0.118  | 0.039                           | 0.039 0.079 0.035 (0.02, 0.01, 0.15) |                                |                                  |                                |
| 8590_23        | ICT1    | ICT1        | 236                       | 0.090  | 0.020    | 1.84E-05             | 0.09 (0.05, 0.13)    | 0.005    | 4.07E-07        | 0.087  | 0.040     | 0.332         | 0.022     | 0.040  | 0.042                           | 0.051                                | 0.033 0.066 0.051 (0.01, 0.02) |                                  |                                |
| 11424_4        | PHAT    | PHAT        | 236                       | 0.093  | 0.022    | 2.28E-05             | 0.09 (0.05, 0.14)    | 0.006    | 0.001           | 0.075  | 0.045     | 0.057         | 0.071     | 0.016  | 0.001                           | 0.628                                | 0.058                          | 0.040 0.149 (0.08, 0.22, 0.14)   |                                |
| 10979_39       | GH2     | GH2         | 236                       | -0.076 | 0.018    | 2.58E-05             | -0.08 (-0.11, -0.04) | 0.006    | 4.94E-06        | -0.023 | 0.036     | 0.444         | 0.022     | 0.036  | 0.031                           | 0.246 -0.04 (-0.10, 0.02)            |                                |                                  |                                |
| 2212_69        | FLM     | FLM         | 236                       | 0.075  | 0.018    | 2.56E-05             | 0.08 (0.04, 0.11)    | 0.006    | 5.98E-06        | 0.036  | 0.036     | 0.315         | 0.044     | -0.033 | 0.11                            | 0.021                                | 0.215 0.069 0.202 (0.07, 0.13) |                                  |                                |
| 3220_40        | RET     | RET         | 236                       | 0.078  | 0.019    | 2.84E-05             | 0.08 (0.04, 0.11)    | 0.007    | 4.66E-06        | 0.023  | 0.038     | 0.535         | 0.022     | 0.036  | 0.003                           | 0.094                                | 0.026                          | 0.034 0.445 (0.04, 0.09)         |                                |
| 17386_23       | DC1M121 | DC1M121     | 236                       | 0.086  | 0.021    | 3.46E-05             | 0.08 (0.04, 0.13)    | 0.008    | 3.03E-06        | 0.024  | 0.041     | 0.562         | 0.022     | 0.041  | 0.069                           | 0.045                                | 0.034 0.178 (0.02, 0.11)       |                                  |                                |
| 3362_81        | CHREL1  | CHREL1      | 236                       | 0.074  | 0.018    | 4.23E-05             | 0.07 (-0.11, -0.04)  | 0.009    | 0.95E-02        | 0.020  | 0.039     | 0.607         | 0.022     | 0.039  | 0.003                           | 0.113                                | 0.050                          | 0.036 0.160 -0.05 (-0.12, 0.02)  |                                |
| 18914_104      | CD14    | CD14        | 236                       | -0.072 | 0.018    | 5.25E-05             | -0.07 (-0.11, -0.04) | 0.011    | 1.00E-06        | 0.038  | 0.099     | 5.84E-03      | 0.077     | 0.077  | -0.004                          | 0.028                                | 0.018                          | 0.031 0.684 -0.02 (-0.08, 0.04)  |                                |
| 18342_2        | PSAT1   | SERP        | 236                       | 0.087  | 0.022    | 5.64E-05             | 0.09 (0.04, 0.13)    | 0.011    | 9.40E-05        | 0.050  | 0.040     | 0.949         | 0.022     | 0.040  | 0.032                           | 0.078                                | 0.039                          | 0.053 0.08 (0.01, 0.16)          |                                |
| 6049_84        | PTFRS   | PTFRS       | 236                       | -0.094 | 0.023    | 5.87E-05             | -0.09 (-0.14, -0.05) | 0.011    | 1.61E-05        | -0.026 | 0.047     | 0.85E-03      | 0.122     | 0.077  | -0.004                          | 0.095                                | 0.049                          | 0.029 -0.05 (-0.13, 0.03)        |                                |
| 9235_3         | PLKDC1  | PLKDC1      | 236                       | 0.073  | 0.020    | 6.33E-05             | 0.07 (-0.11, -0.04)  | 0.012    | 0.084           | 0.070  | 0.039     | 0.707         | 0.022     | 0.040  | 0.002                           | 0.924                                | 0.065                          | 0.037 0.076 -0.07 (-0.14, 0.01)  |                                |
| 12918_50       | AKR1C1  | Akrivastin  | 236                       | 0.077  | 0.019    | 6.63E-05             | 0.08 (0.04, 0.12)    | 0.012    | 0.93E-06        | 0.039  | 0.041     | 0.849         | 0.022     | 0.040  | 0.069                           | 0.038                                | 0.115 0.08 (0.02, 0.13)        |                                  |                                |
| 17138_8        | GSTA1   | GSTA1       | 236                       | -0.081 | 0.020    | 8.38E-05             | -0.08 (-0.12, 0.01)  | 0.014    | 0.042           | 0.051  | 0.041     | 0.220         | 0.055     | 0.033  | 0.002                           | 0.407                                | 0.049                          | 0.036 0.170 0.05 (-0.02, 0.12)   |                                |
| 4929_55        | SHBG    | SHBG        | 236                       | -0.082 | 0.021    | 8.59E-05             | -0.08 (-0.12, 0.01)  | 0.014    | 1.50E-06        | 0.042  | 0.042     | 0.933         | 0.022     | 0.040  | -0.005                          | 0.919                                | 0.079                          | 0.029 0.008 -0.08 (-0.14, -0.02) |                                |
| 8313_27        | CBAT1   | CBAT1       | 236                       | 0.075  | 0.019    | 8.96E-05             | 0.08 (0.04, 0.12)    | 0.015    | 1.42E-06        | 0.039  | 0.041     | 0.849         | 0.022     | 0.040  | 0.015                           | 0.142                                | 0.068                          | 0.011 0.01 (0.08, 0.02)          |                                |
| 4559_84        | KYNU    | KYNU        | 236                       | 0.075  | 0.019    | 8.96E-05             | 0.08 (0.04, 0.12)    | 0.015    | 1.42E-06        | 0.039  | 0.041     | 0.849         | 0.022     | 0.040  | 0.015                           | 0.142                                | 0.068                          | 0.011 0.01 (0.08, 0.02)          |                                |
| 8699_53        | CPCLT   | CPCLT       | 236                       | -0.089 | 0.023    | 1.06E-04             | -0.09 (-0.13, -0.04) | 0.016    | 8.94E-09        | -0.048 | 0.048     | 0.322         | 0.053     | -0.043 | 0.028                           | 0.286                                | -0.073                         | 0.039 0.058 -0.07 (-0.15, 0.01)  |                                |
| 7124_18        | ENB     | ENB         | 236                       | 0.088  | 0.020    | 2.81E-04             | 0.09 (0.05, 0.13)    | 0.016    | 8.94E-09        | 0.048  | 0.048     | 0.322         | 0.053     | 0.043  | 0.028                           | 0.286                                | -0.073                         | 0.039 0.058 -0.07 (-0.15, 0.01)  |                                |
| 11676_137      | ENOB    | ENOB        | 236                       | -0.087 | 0.023    | 1.80E-04             | -0.09 (-0.13, 0.01)  | 0.023    | 0.114           | 0.043  | 0.038     | 0.260         | 0.044     | -0.033 | 0.12                            | 0.038                                | 0.041                          | 0.348 0.04 (-0.17, 0.12)         |                                |
| 14101_23       | CNTFR   | CNTFR       | 236                       | 0.086  | 0.021    | 3.46E-04             | 0.08 (0.04, 0.13)    | 0.023    | 0.041           | 0.041  | 0.041     | 0.324         | 0.044     | -0.033 | 0.12                            | 0.038                                | 0.041                          | 0.348 0.04 (-0.17, 0.12)         |                                |
| 19241_31       | HERP5   | HERP5       | 236                       | 0.077  | 0.020    | 1.72E-04             | 0.08 (0.04, 0.12)    | 0.023    | 0.009           | 0.079  | 0.041     | 0.057         | 0.044     | -0.033 | 0.12                            | 0.038                                | 0.041                          | 0.348 0.04 (-0.17, 0.12)         |                                |
| 7860_9         | HERP4   | HERP4       | 236                       | 0.072  | 0.019    | 1.76E-04             | 0.07 (0.03, 0.11)    | 0.023    | 0.080           | 0.041  | 0.041     | 0.324         | 0.044     | -0.033 | 0.12                            | 0.038                                | 0.041                          | 0.348 0.04 (-0.17, 0.12)         |                                |
| 8497_10        | RS1     | RS1         | 236                       | 0.072  | 0.019    | 1.76E-04             | 0.07 (0.03, 0.11)    | 0.023    | 0.080           | 0.041  | 0.041     | 0.324         | 0.044     | -0.033 | 0.12                            | 0.038                                | 0.041                          | 0.348 0.04 (-0.17, 0.12)         |                                |
| 11416_23       | DOX     | DOX         | 236                       | 0.072  | 0.019    | 2.22E-04             | 0.07 (0.03, 0.11)    | 0.028    | 0.353           | 0.099  | 0.040     | 0.018         | 0.099     | 0.022  | 0.041                           | 0.056                                | 0.093                          | 0.041                            | 0.023 0.099 0.07 (-0.01, 0.14) |
| 11912_35       | FBXL4   | FBXL4       | 236                       | -0.077 | 0.021    | 7.77E-04             | -0.08 (-0.12, -0.04) | 0.028    | 0.009           | -0.015 | 0.040     | 0.732         | 0.021     | 0.041  | -0.001                          | 0.506                                | 0.093                          | 0.039 0.147 -0.06 (-0.12, 0.02)  |                                |
| 13460_4        | CHAD    | CHAD        | 236                       | 0.086  | 0.021    | 2.97E-04             | 0.09 (0.05, 0.13)    | 0.028    | 0.119           | 0.040  | 0.041     | 0.324         | 0.044     | -0.033 | 0.12                            | 0.038                                | 0.041                          | 0.348 0.04 (-0.17, 0.12)         |                                |
| 13933_26       | NAB1    | NAB1        | 236                       | 0.069  | 0.019    | 2.44E-04             | 0.07 (0.03, 0.11)    | 0.028    | 0.196           | 0.035  | 0.039     | 0.375         | 0.033     | -0.041 | 0.11                            | 0.021                                | 0.321                          | 0.036                            | 0.035 0.312 0.04 (-0.03, 0.11) |
| 15826_29       | ADH1C   | ADH1C       | 236                       | 0.085  | 0.023    | 2.86E-04             | 0.08 (0.04, 0.13)    | 0.028    | 1.73E-08        | 0.059  | 0.047     | 0.209         | 0.038     | 0.033  | 0.022                           | 0.538                                | 0.070                          | 0.039 0.076 -0.07 (-0.14, 0.01)  |                                |
| 15591_28       | CPK1    | CPK1        | 236                       | 0.087  | 0.022    | 3.05E-04             | 0.09 (0.05, 0.13)    | 0.028    | 1.83E-02        | 0.038  | 0.042     | 0.396         | 0.022     | 0.040  | 0.022                           | 0.608                                | 0.038                          | 0.042 0.184 -0.02 (0.11, 0.07)   |                                |
| 16763_11       | LECT2   | LECT2       | 236                       | 0.077  | 0.021    | 3.05E-04             | 0.08 (0.04, 0.12)    | 0.028    | 0.203           | -0.017 | 0.042     | 0.680         | 0.022     | 0.040  | 0.006                           | 0.011                                | 0.095                          | 0.039                            | 0.016 0.09 (0.02, 0.17)        |
| 18397_5        | AKR1C4  | AKR1C4      | 236                       | 0.079  | 0.022    | 3.05E-04             | 0.08 (0.04, 0.12)    | 0.028    | 8.60E-06        | 0.033  | 0.044     | 0.458         | 0.033     | 0.033  | 0.022                           | 0.919                                | 0.077                          | 0.034 0.612 0.02 (-0.05, 0.08)   |                                |
| 18208_12       | GLU     | GLU         | 236                       | 0.077  | 0.021    | 3.05E-04             | 0.08 (0.04, 0.12)    | 0.028    | 8.60E-06        | 0.033  | 0.044     | 0.458         | 0.033     | 0.033  | 0.022                           | 0.919                                | 0.077                          | 0.034 0.612 0.02 (-0.05, 0.08)   |                                |
| 2837_3         | MET     | MET         | 236                       | -0.115 | 0.023    | 3.07E-04             | -0.12 (-0.18, -0.05) | 0.028    | 4.02E-04        | 0.001  | 0.064     | 0.88E-03      | 0.111     | 0.044  | -0.008                          | 0.423                                | 0.023                          | 0.034 0.501 -0.02 (-0.08, 0.04)  |                                |
| 2950_57        | IGFBP1  | IGFBP1      | 236                       | 0.071  | 0.019    | 2.35E-04             | 0.07 (0.03, 0.11)    | 0.028    | 0.90E-04        | 0.041  | 0.041     | 0.914         | 0.022     | 0.040  | 0.003                           | 0.603                                | 0.043                          | 0.033 0.200 0.04 (-0.02, 0.12)   |                                |
| 3550_25        | SEPPOR1 | SEPPOR1     | 236                       | 0.080  | 0.022    | 3.03E-04             | 0.08 (0.04, 0.12)    | 0.028    | 6.95E-05        | 0.068  | 0.041     | 0.922         | 0.022     |        |                                 |                                      |                                |                                  |                                |

Table S5. Association of type 2 diabetes with Ferland plasma protein.

| SomaLogScore | Protein | rsnp     | Inverse variance weighted |       |        |         | MR Egger          |                          |        |          | Weighted median |                    |                              |                          | Weighted mode |       |                          |                             |                           |       |                   |                     |                   |
|--------------|---------|----------|---------------------------|-------|--------|---------|-------------------|--------------------------|--------|----------|-----------------|--------------------|------------------------------|--------------------------|---------------|-------|--------------------------|-----------------------------|---------------------------|-------|-------------------|---------------------|-------------------|
|              |         |          | b                         | se    | ci_low | ci_high | b                 | se                       | ci_low | ci_high  | b               | se                 | ci_low                       | ci_high                  | b             | se    | ci_low                   | ci_high                     |                           |       |                   |                     |                   |
| 12845        | SNX17   | SNX17    | 0.26                      | 0.052 | 0.19   | 0.055   | 0.05 (0.02, 0.09) | 0.130                    | 0.400  | 0.038    | 0.038           | 0.134 (0.04, 0.11) | 0.001                        | 0.071                    | 0.023         | 0.032 | 0.457                    | 0.02 (0.04, 0.09)           | 0.014                     | 0.039 | 0.715             | 0.01 (0.06, 0.23)   |                   |
| 15460        | DPPI4   | DPPI4    | 0.26                      | 0.052 | 0.19   | 0.055   | 0.05 (0.02, 0.09) | 0.130                    | 0.400  | 0.038    | 0.038           | 0.134 (0.04, 0.11) | 0.001                        | 0.071                    | 0.023         | 0.032 | 0.457                    | 0.02 (0.04, 0.09)           | 0.014                     | 0.039 | 0.715             | 0.01 (0.06, 0.23)   |                   |
| 6898         | 49      | THNSFA1  | LIGHT                     | 0.26  | 0.052  | 0.19    | 0.055             | 0.05 (0.02, 0.09)        | 0.130  | 0.400    | 0.038           | 0.038              | 0.134 (0.04, 0.11)           | 0.001                    | 0.071         | 0.023 | 0.032                    | 0.457                       | 0.02 (0.04, 0.09)         | 0.014 | 0.039             | 0.715               | 0.01 (0.06, 0.23) |
| 15460        | DPPI4   | DPPI4    | LIGHT                     | 0.26  | 0.052  | 0.19    | 0.055             | 0.05 (0.02, 0.09)        | 0.130  | 0.400    | 0.038           | 0.038              | 0.134 (0.04, 0.11)           | 0.001                    | 0.071         | 0.023 | 0.032                    | 0.457                       | 0.02 (0.04, 0.09)         | 0.014 | 0.039             | 0.715               | 0.01 (0.06, 0.23) |
| 8353         | 15      | SCN2B    | SCN2B                     | 0.26  | 0.052  | 0.19    | 0.055             | 0.05 (0.02, 0.09)        | 0.130  | 0.400    | 0.038           | 0.038              | 0.134 (0.04, 0.11)           | 0.001                    | 0.071         | 0.023 | 0.032                    | 0.457                       | 0.02 (0.04, 0.09)         | 0.014 | 0.039             | 0.715               | 0.01 (0.06, 0.23) |
| 18434        | 141     | TBPL1    | TBPL1                     | 0.26  | 0.051  | 0.18    | 0.055             | 0.05 (0.02, 0.09)        | 0.131  | 0.412    | 0.041           | 0.039              | 0.287 (0.04, 0.12)           | 0.001                    | 0.072         | 0.014 | 0.032                    | 0.664 (0.10, 0.08)          | 0.025                     | 0.043 | 0.568             | 0.02 (0.07, 0.11)   |                   |
| 6274         | 15      | WSD2D    | WSD2D                     | 0.26  | 0.052  | 0.18    | 0.055             | 0.05 (0.02, 0.09)        | 0.131  | 0.412    | 0.041           | 0.039              | 0.287 (0.04, 0.12)           | 0.001                    | 0.072         | 0.014 | 0.032                    | 0.664 (0.10, 0.08)          | 0.025                     | 0.043 | 0.568             | 0.02 (0.07, 0.11)   |                   |
| 8327         | 26      | DPPE2    | DPPE2                     | 0.26  | 0.052  | 0.18    | 0.055             | 0.05 (0.02, 0.09)        | 0.131  | 0.412    | 0.041           | 0.039              | 0.287 (0.04, 0.12)           | 0.001                    | 0.072         | 0.014 | 0.032                    | 0.664 (0.10, 0.08)          | 0.025                     | 0.043 | 0.568             | 0.02 (0.07, 0.11)   |                   |
| 10557        | 6       | TELX2    | TELX2                     | 0.26  | 0.054  | 0.19    | 0.055             | 0.05 (0.02, 0.09)        | 0.132  | 0.428    | 0.047           | 0.040              | 0.881 (0.01, 0.07)           | 0.003                    | 0.178         | 0.026 | 0.032                    | 0.414 (0.03, 0.04)          | 0.009                     | 0.042 | 0.971             | 0.1566 (0.08, 0.08) |                   |
| 10554        | 23      | IGL1     | IGL1                      | 0.26  | 0.054  | 0.19    | 0.055             | 0.05 (0.02, 0.09)        | 0.133  | 0.438    | 0.053           | 0.041              | 0.394 (0.04, 0.05, 12)       | 0.001                    | 0.587         | 0.007 | 0.035                    | 0.846 (0.01, 0.04, 0.09)    | 0.017                     | 0.047 | 0.679             | 0.02 (0.06, 0.10)   |                   |
| 10561        | 5       | PSYBP1   | PSYBP1                    | 0.26  | 0.054  | 0.19    | 0.055             | 0.05 (0.02, 0.09)        | 0.133  | 0.438    | 0.053           | 0.041              | 0.394 (0.04, 0.05, 12)       | 0.001                    | 0.587         | 0.007 | 0.035                    | 0.846 (0.01, 0.04, 0.09)    | 0.017                     | 0.047 | 0.679             | 0.02 (0.06, 0.10)   |                   |
| 10753        | 31      | ADAM1    | ADAM1                     | 0.26  | 0.054  | 0.19    | 0.055             | 0.05 (0.02, 0.09)        | 0.133  | 0.438    | 0.053           | 0.041              | 0.394 (0.04, 0.05, 12)       | 0.001                    | 0.587         | 0.007 | 0.035                    | 0.846 (0.01, 0.04, 0.09)    | 0.017                     | 0.047 | 0.679             | 0.02 (0.06, 0.10)   |                   |
| 14636        | 25      | HRSMP12  | Ribonuclease              | 0.26  | 0.063  | 0.223   | 0.055             | 0.05 (0.02, 0.11)        | 0.133  | 0.496    | 0.053           | 0.048              | 0.342 (0.04, 0.05, 13)       | 0.001                    | 0.624         | 0.040 | 0.036                    | 0.270 (0.04, 0.03, 0.17)    | 0.023                     | 0.037 | 0.655             | 0.05 (0.10, 0.25)   |                   |
| 15468        | 14      | CFHR1    | PHR1                      | 0.26  | 0.052  | 0.18    | 0.055             | 0.05 (0.02, 0.09)        | 0.133  | 0.428    | 0.047           | 0.040              | 0.881 (0.01, 0.07)           | 0.003                    | 0.178         | 0.026 | 0.032                    | 0.414 (0.03, 0.04)          | 0.009                     | 0.042 | 0.971             | 0.1566 (0.08, 0.08) |                   |
| 15483        | 37      | AGRN     | Aggrin                    | 0.26  | 0.064  | 0.223   | 0.055             | 0.05 (0.02, 0.11)        | 0.133  | 0.496    | 0.053           | 0.048              | 0.342 (0.04, 0.05, 13)       | 0.001                    | 0.624         | 0.040 | 0.036                    | 0.270 (0.04, 0.03, 0.17)    | 0.023                     | 0.037 | 0.655             | 0.05 (0.10, 0.25)   |                   |
| 15489        | 11      | ATRN     | Ahrn                      | 0.26  | 0.054  | 0.19    | 0.055             | 0.05 (0.02, 0.09)        | 0.133  | 0.438    | 0.053           | 0.041              | 0.394 (0.04, 0.05, 12)       | 0.001                    | 0.587         | 0.007 | 0.035                    | 0.846 (0.01, 0.04, 0.09)    | 0.017                     | 0.047 | 0.679             | 0.02 (0.06, 0.10)   |                   |
| 17758        | 79      | DCXR     | DCXR                      | 0.26  | 0.056  | 0.20    | 0.055             | 0.05 (0.02, 0.09)        | 0.133  | 0.452    | 0.056           | 0.041              | 0.688 (0.02, 0.06, 0.12)     | 0.002                    | 0.275         | 0.020 | 0.032                    | 0.325 (0.02, 0.08, 0.04)    | 0.018                     | 0.037 | 0.876             | 0.02 (0.06, 0.10)   |                   |
| 19175        | 18      | MARCKSL1 | MARCKSL1                  | 0.26  | 0.058  | 0.21    | 0.055             | 0.05 (0.02, 0.11)        | 0.133  | 0.476    | 0.060           | 0.042              | 0.857 (0.01, 0.09, 0.08)     | 0.003                    | 0.167         | 0.048 | 0.033                    | 0.141 (0.05, 0.12, 0.02)    | 0.016                     | 0.038 | 0.876             | 0.02 (0.06, 0.10)   |                   |
| 6038         | 12      | JTB      | JTB                       | 0.26  | 0.052  | 0.18    | 0.055             | 0.05 (0.02, 0.09)        | 0.133  | 0.428    | 0.047           | 0.040              | 0.881 (0.01, 0.07)           | 0.003                    | 0.178         | 0.026 | 0.032                    | 0.414 (0.03, 0.04)          | 0.009                     | 0.042 | 0.971             | 0.1566 (0.08, 0.08) |                   |
| 10820        | 21      | MSSM     | PSP-9A                    | 0.26  | 0.050  | 0.18    | 0.055             | 0.05 (0.02, 0.09)        | 0.134  | 0.407    | 0.043           | 0.036              | 0.086 (0.06, 0.13, 0.01)     | 0.001                    | 0.689         | 0.058 | 0.032                    | 0.066 (0.06, 0.12, 3.78e-4) | 0.057                     | 0.038 | 0.143             | 0.06 (0.13, 0.02)   |                   |
| 14747        | 9       | CRFL1    | CRFL1                     | 0.26  | 0.053  | 0.19    | 0.055             | 0.05 (0.02, 0.09)        | 0.134  | 0.410    | 0.045           | 0.041              | 0.020 (0.10, 0.18, 0.02)     | 0.003                    | 0.233         | 0.049 | 0.037                    | 0.184 (0.05, 0.12, 0.02)    | 0.067                     | 0.041 | 0.165             | 0.07 (0.15, 0.01)   |                   |
| 11286        | 78      | VAMP     | SELS                      | 0.26  | 0.051  | 0.18    | 0.055             | 0.05 (0.02, 0.09)        | 0.134  | 0.407    | 0.043           | 0.036              | 0.086 (0.06, 0.13, 0.01)     | 0.001                    | 0.689         | 0.058 | 0.032                    | 0.066 (0.06, 0.12, 3.78e-4) | 0.057                     | 0.038 | 0.143             | 0.06 (0.13, 0.02)   |                   |
| 13883        | 27      | CRYZ     | QOR                       | 0.26  | 0.053  | 0.19    | 0.055             | 0.05 (0.02, 0.09)        | 0.137  | 0.211    | 0.041           | 0.040              | 0.309 (0.04, 0.04, 12)       | 0.001                    | 0.728         | 0.060 | 0.033                    | 0.073 (0.06, 0.11, 0.12)    | 0.053                     | 0.042 | 0.208             | 0.05 (0.03, 0.14)   |                   |
| 13810        | 9       | MAGE10   | MAGE10                    | 0.26  | 0.053  | 0.19    | 0.055             | 0.05 (0.02, 0.09)        | 0.138  | 0.251    | 0.020           | 0.039              | 0.622 (0.02, 0.06, 0.10)     | 0.002                    | 0.328         | 0.010 | 0.032                    | 0.983 (1.50e-03, 0.06, 0.0) | 0.009                     | 0.044 | 0.832             | 0.01 (0.06, 0.09)   |                   |
| 19863        | 3       | SEZL2    | SEZL2                     | 0.26  | 0.057  | 0.21    | 0.057             | 0.06 (0.02, 0.10, 0.02)  | 0.138  | 0.261    | 0.041           | 0.038              | 0.04 (0.04, 0.12)            | 0.006                    | 0.006         | 0.022 | 0.034                    | 0.508 (0.02, 0.08, 0.04)    | 0.026                     | 0.039 | 0.502             | 0.03 (0.10, 0.05)   |                   |
| 8373         | 54      | DLK1     | DLK1                      | 0.26  | 0.070  | 0.225   | 0.060             | 0.07 (-0.12, 0.02, 0.08) | 0.138  | 0.336    | 0.133           | 0.022              | 0.051                        | 0.683 (0.02, 0.12, 0.08) | 0.003         | 0.285 | 0.044                    | 0.038                       | 0.247 (-0.04, 0.12, 0.03) | 0.024 | 0.039             | 0.532               | 0.02 (0.10, 0.05) |
| 9213         | 24      | FTCD     | FTCD                      | 0.26  | 0.060  | 0.222   | 0.060             | 0.06 (0.02, 0.10)        | 0.138  | 0.366    | 0.044           | 0.047              | 0.285 (0.05, 0.04, 0.13)     | 0.001                    | 0.734         | 0.023 | 0.039                    | 0.560 (0.02, 0.05, 0.10)    | 0.026                     | 0.038 | 0.462             | 0.03 (0.05, 0.10)   |                   |
| 15442        | 140     | SFSB1    | SFSB1                     | 0.26  | 0.059  | 0.20    | 0.059             | 0.05 (0.02, 0.10)        | 0.139  | 0.344    | 0.043           | 0.043              | 0.047 (0.04, 0.12)           | 0.001                    | 0.734         | 0.023 | 0.039                    | 0.560 (0.02, 0.05, 0.10)    | 0.026                     | 0.038 | 0.462             | 0.03 (0.05, 0.10)   |                   |
| 2681         | 23      | HGF      | HGF                       | 0.26  | 0.059  | 0.20    | 0.059             | 0.05 (0.02, 0.10)        | 0.139  | 0.344    | 0.043           | 0.043              | 0.047 (0.04, 0.12)           | 0.001                    | 0.734         | 0.023 | 0.039                    | 0.560 (0.02, 0.05, 0.10)    | 0.026                     | 0.038 | 0.462             | 0.03 (0.05, 0.10)   |                   |
| 5708         | 18      | LEAP2    | LEAP2                     | 0.26  | 0.068  | 0.224   | 0.067             | 0.07 (0.02, 0.11)        | 0.143  | 0.966    | 0.104           | 0.049              | 0.283 (0.05, 0.04, 0.13)     | 0.001                    | 0.748         | 0.035 | 0.032                    | 0.273 (0.04, 0.03, 0.10)    | 0.031                     | 0.045 | 0.485             | 0.03 (0.06, 0.12)   |                   |
| 15422        | 66      | ENO2     | ENO2                      | 0.26  | 0.058  | 0.20    | 0.058             | 0.05 (0.02, 0.10)        | 0.143  | 0.966    | 0.104           | 0.049              | 0.283 (0.05, 0.04, 0.13)     | 0.001                    | 0.748         | 0.035 | 0.032                    | 0.273 (0.04, 0.03, 0.10)    | 0.031                     | 0.045 | 0.485             | 0.03 (0.06, 0.12)   |                   |
| 17817        | 22      | DDIT4    | DDIT4                     | 0.26  | 0.068  | 0.224   | 0.067             | 0.07 (0.02, 0.11)        | 0.146  | 0.017    | 0.013           | 0.043              | 0.763 (0.01, 0.07, 0.10)     | 0.003                    | 0.227         | 0.040 | 0.037                    | 0.280 (0.04, 0.03, 0.11)    | 0.043                     | 0.043 | 0.318             | 0.04 (0.04, 0.13)   |                   |
| 3040         | 43      | CFP      | CFP                       | 0.26  | 0.058  | 0.20    | 0.058             | 0.05 (0.02, 0.10)        | 0.146  | 0.017    | 0.013           | 0.043              | 0.763 (0.01, 0.07, 0.10)     | 0.003                    | 0.227         | 0.040 | 0.037                    | 0.280 (0.04, 0.03, 0.11)    | 0.043                     | 0.043 | 0.318             | 0.04 (0.04, 0.13)   |                   |
| 6062         | 43      | NSC      | Tensin                    | 0.26  | 0.058  | 0.20    | 0.058             | 0.05 (0.02, 0.10)        | 0.148  | 0.005    | 0.018           | 0.043              | 0.014 (-0.22, 0.05)          | 0.005                    | 0.032         | 0.106 | 0.036                    | 0.003 (-0.11, 0.08, 0.04)   | 0.094                     | 0.040 | 0.202             | 0.09 (0.17, 0.02)   |                   |
| 1042         | 14      | INSL5    | Insulin                   | 0.26  | 0.049  | 0.18    | 0.057             | 0.05 (0.02, 0.09)        | 0.148  | 0.228    | 0.011           | 0.038              | 0.777 (0.01, 0.09, 0.08)     | 0.002                    | 0.241         | 0.034 | 0.034                    | 0.814 (-3.7e-03, 0.07)      | 0.013                     | 0.038 | 0.731             | 0.01 (0.09, 0.06)   |                   |
| 3235         | 50      | WRKNC2   | WRKNC2                    | 0.26  | 0.051  | 0.19    | 0.057             | 0.05 (0.02, 0.09)        | 0.149  | 0.134    | 0.042           | 0.040              | 0.296 (0.04, 0.04, 12)       | 0.006                    | 0.007         | 0.032 | 0.324 (0.03, 0.09, 0.03) | 0.011                       | 0.043                     | 0.805 | 0.01 (0.07, 0.02) |                     |                   |
| 8871         | 37      | TRAPP3   | TRAPP3                    | 0.26  | 0.052  | 0.19    | 0.057             | 0.05 (0.02, 0.09)        | 0.149  | 0.134    | 0.042           | 0.040              | 0.296 (0.04, 0.04, 12)       | 0.006                    | 0.007         | 0.032 | 0.324 (0.03, 0.09, 0.03) | 0.011                       | 0.043                     | 0.805 | 0.01 (0.07, 0.02) |                     |                   |
| 16320        | 59      | MAGEA8   | MAGEA8                    | 0.26  | 0.051  | 0.19    | 0.057             | 0.05 (0.02, 0.09)        | 0.149  | 0.134    | 0.042           | 0.040              | 0.296 (0.04, 0.04, 12)       | 0.006                    | 0.007         | 0.032 | 0.324 (0.03, 0.09, 0.03) | 0.011                       | 0.043                     | 0.805 | 0.01 (0.07, 0.02) |                     |                   |
| 11457        | 53      | GALE     | GALE                      | 0.26  | 0.068  | 0.225   | 0.067             | 0.07 (0.02, 0.11)        | 0.150  | 7.01e-11 | 0.019           | 0.051              | 0.710 (0.02, 0.08, 0.12)     | 0.003                    | 0.286         | 0.101 | 0.040                    | 0.102 (0.02, 0.18)          | 0.027                     | 0.041 | 0.308             | 0.09 (0.09, 0.17)   |                   |
| 14718        | 18      | CDKN3    | CDKN3                     | 0.26  | 0.058  | 0.202   | 0.057             | 0.06 (0.02, 0.10, 0.02)  | 0.150  | 0.044    | 0.023           | 0.043              | 0.584 (0.02, 0.08, 0.11)     | 0.005                    | 0.031         | 0.045 | 0.040                    | 0.259 (-0.04, 0.12, 0.03)   | 0.022                     | 0.041 | 0.585             | 0.02 (0.10, 0.06)   |                   |
| 17474        | 108     | VEGFA    | VEGFA                     | 0.26  | 0.058  | 0.202   | 0.057             | 0.06 (0.02, 0.10, 0.02)  | 0.150  | 0.044    | 0.023           | 0.043              | 0.584 (0.02, 0.08, 0.11)     | 0.005                    | 0.031         | 0.045 | 0.040                    | 0.259 (-0.04, 0.12, 0.03)   | 0.022                     | 0.041 | 0.585             | 0.02 (0.10, 0.06)   |                   |
| 18928        | 10      | S100Y    | S100Y                     | 0.26  | 0.053  | 0.202   | 0.057             | 0.06 (0.02, 0.10, 0.02)  | 0.151  | 0.005    | 0.004           | 0.039              | 0.997 (1.31e-04, 0.08, 0.08) | 0.003                    | 0.124         | 0.016 | 0.036                    | 0.653 (0.02, 0.09, 0.05)    | 0.042                     | 0.040 | 0.295             | 0.04 (0.12, 0.04)   |                   |
| 8352         | 28      | SIGLEC2  | SIGLEC2                   | 0.26  | 0.059  | 0.202   | 0.057             | 0.06 (0.02, 0.10, 0.02)  | 0.151  | 0.005    | 0.004           | 0.039              | 0.997 (1.31e-04, 0.08, 0.08) | 0.003                    | 0.124         | 0.016 | 0.036                    | 0.653 (0.02, 0.09, 0.05)    | 0.042                     | 0.040 | 0.295             | 0.04 (0.12, 0.04)   |                   |
| 8617         | 29      | CEP350   | CEP350                    | 0.26  | 0.088  | 0.233   | 0.067             | 0.07 (0.02, 0.11)        | 0.151  | 3.29e-48 | 0.051           | 0.066              | 0.441 (0.05, 0.08, 0.16)     | 0.002                    |               |       |                          |                             |                           |       |                   |                     |                   |

Table S5. Association of type 2 diabetes with Ferland plasma protein.

| SomaLogicGene | Protein  | tsp            | Inverse variance weighted |       | MR Egger |                      | Weighted median      |       | Weighted mode |          |            |                     |                          |        |         |           |         |                     |                          |                  |       |                     |                       |                        |
|---------------|----------|----------------|---------------------------|-------|----------|----------------------|----------------------|-------|---------------|----------|------------|---------------------|--------------------------|--------|---------|-----------|---------|---------------------|--------------------------|------------------|-------|---------------------|-----------------------|------------------------|
|               |          |                | b/w                       | se/w  | pval/IV  | CI/w                 | FDR_ZW               | Q1    | pval          | se/egger | pval/egger | se/median           | pval/median              | b.mode | se.mode | pval/mode | CI/mode |                     |                          |                  |       |                     |                       |                        |
| 2879.9        | SERPNA3  | a1-Antitrypsin | 0.19                      | 0.019 | 0.016    | -0.05 (-0.08, -0.01) | 0.213                | 0.127 | 0.003         | 0.451    | 0.956      | 0.258 (-0.08, 0.08) | -0.003                   | 0.167  | 0.059   | 0.41      | 0.151   | -0.06 (-0.14, 0.02) | -0.065                   | 0.41             | 0.118 | -0.07 (-0.15, 0.02) |                       |                        |
| 12391.27      | POSD2    |                | 0.22                      | 0.022 | 0.018    | -0.05 (-0.08, -0.01) | 0.213                | 0.127 | 0.003         | 0.451    | 0.956      | 0.258 (-0.08, 0.08) | -0.003                   | 0.167  | 0.059   | 0.41      | 0.151   | -0.06 (-0.14, 0.02) | -0.065                   | 0.41             | 0.118 | -0.07 (-0.15, 0.02) |                       |                        |
| 13116.5       | SMOC1    | SMOC1          | 0.26                      | 0.049 | 0.020    | 0.016                | -0.05 (-0.09, 0.01)  | 0.213 | 0.127         | 0.004    | 0.41       | 0.270               | -0.05 (-0.13, 0.04)      | 0.000  | 0.919   | 0.070     | 0.035   | 0.046               | -0.07 (-0.14, -0.12e-01) | 0.001            | 0.440 | 0.205               | -0.05 (-0.13, 0.03)   |                        |
| 5882.34       | EEF1B2   | EEF1-beta      | 0.26                      | 0.045 | 0.019    | 0.016                | 0.04 (-0.01, 0.08)   | 0.214 | 0.091         | 0.048    | 0.038      | 0.028               | 0.08 (0.01, 0.16)        | -0.002 | 0.227   | 0.003     | 0.031   | 0.935               | 0.252                    | 0.03 (0.06, 0.0) | 0.000 | 0.441               | 0.996                 | -2.13e-04 (0.08, 0.08) |
| 8636.30       | DOX      |                | 0.26                      | 0.045 | 0.019    | 0.016                | 0.04 (-0.01, 0.08)   | 0.214 | 0.091         | 0.048    | 0.038      | 0.028               | 0.08 (0.01, 0.16)        | -0.002 | 0.227   | 0.003     | 0.031   | 0.935               | 0.252                    | 0.03 (0.06, 0.0) | 0.000 | 0.441               | 0.996                 | -2.13e-04 (0.08, 0.08) |
| 11967.23      | DNK1     | ZNF10          | 0.26                      | 0.047 | 0.019    | 0.016                | 0.05 (0.01, 0.08)    | 0.215 | 0.063         | 0.112    | 0.039      | 0.041               | 0.011 (0.04, 0.19)       | -0.004 | 0.554   | 0.093     | 0.034   | 0.06                | 0.09 (0.03, 0.16)        | 0.002            | 0.440 | 0.024               | 0.09 (0.01, 0.17)     |                        |
| 16831.7       | DOX1     | DOX1           | 0.26                      | 0.044 | 0.019    | 0.016                | 0.05 (0.01, 0.08)    | 0.215 | 0.063         | 0.112    | 0.039      | 0.041               | 0.011 (0.04, 0.19)       | -0.004 | 0.554   | 0.093     | 0.034   | 0.06                | 0.09 (0.03, 0.16)        | 0.002            | 0.440 | 0.024               | 0.09 (0.01, 0.17)     |                        |
| 8324.3        | OST2     |                | 0.26                      | 0.047 | 0.019    | 0.016                | 0.05 (0.01, 0.08)    | 0.215 | 0.063         | 0.112    | 0.039      | 0.041               | 0.011 (0.04, 0.19)       | -0.004 | 0.554   | 0.093     | 0.034   | 0.06                | 0.09 (0.03, 0.16)        | 0.002            | 0.440 | 0.024               | 0.09 (0.01, 0.17)     |                        |
| 8220.15       | C10orf55 | CJ35           | 0.26                      | 0.047 | 0.019    | 0.016                | 0.05 (-0.08, 0.01)   | 0.216 | 0.764         | 0.078    | 0.039      | 0.046               | 0.08 (-0.15, 1.71e-03)   | 0.002  | 0.349   | 0.077     | 0.039   | 0.04                | -0.08 (-0.15, -1.97e-01) | -0.009           | 0.442 | 0.037               | -0.09 (-0.17, 0.01)   |                        |
| 2888.49       | CT       | CT             | 0.26                      | 0.050 | 0.021    | 0.017                | -0.05 (-0.09, 0.01)  | 0.216 | 0.044         | -0.022   | 0.044      | 0.596               | -0.02 (-0.11, 0.06)      | -0.002 | 0.449   | 0.059     | 0.038   | 0.161               | -0.05 (-0.13, 0.02)      | -0.013           | 0.441 | 0.755               | -0.01 (-0.09, 0.07)   |                        |
| 18007.87      | KRDL1    | KOL1           | 0.26                      | 0.048 | 0.019    | 0.017                | -0.05 (-0.09, 0.01)  | 0.217 | 0.181         | 0.042    | 0.043      | 0.045               | 0.08 (0.01, 0.16)        | -0.002 | 0.449   | 0.059     | 0.038   | 0.161               | -0.05 (-0.13, 0.02)      | -0.013           | 0.441 | 0.755               | -0.01 (-0.09, 0.07)   |                        |
| 5755.29       | GP       | GP             | 0.26                      | 0.046 | 0.019    | 0.017                | -0.05 (-0.09, 0.01)  | 0.217 | 0.213         | -0.050   | 0.041      | 0.219               | -0.05 (-0.13, 0.03)      | 0.000  | 0.919   | 0.036     | 0.037   | 0.007               | -0.04 (-0.11, 0.03)      | -0.038           | 0.439 | 0.331               | -0.04 (-0.11, 0.04)   |                        |
| 5105.2        | RTHAR    | Negce          | 0.26                      | 0.052 | 0.022    | 0.017                | 0.05 (0.01, 0.1)     | 0.217 | 0.002         | 0.006    | 0.044      | 0.895               | 0.01 (-0.08, 0.09)       | 0.000  | 0.225   | 0.020     | 0.040   | 0.619               | 0.02 (-0.06, 0.10)       | 0.040            | 0.440 | 0.329               | 0.04 (-0.04, 0.12)    |                        |
| 7655.11       | NFB9     | Prm5           | 0.26                      | 0.046 | 0.019    | 0.017                | -0.05 (-0.09, 0.01)  | 0.219 | 0.001         | -0.022   | 0.041      | 0.575               | 0.01 (-0.10, 0.06)       | -0.002 | 0.451   | 0.099     | 0.030   | 0.764               | 0.01 (-0.07, 0.05)       | 0.022            | 0.441 | 0.912               | 0.02 (-0.07, 0.11)    |                        |
| 7179.89       | NFASC    | NFASC          | 0.26                      | 0.057 | 0.024    | 0.017                | 0.06 (0.01, 0.1)     | 0.220 | 1.696         | 0.147    | 0.048      | 0.003               | 0.14 (0.03, 0.24)        | -0.005 | 0.936   | 0.054     | 0.042   | 0.240               | 0.05 (-0.03, 0.14)       | 0.068            | 0.444 | 0.123               | 0.07 (-0.02, 0.15)    |                        |
| 15333.11      | SDF2     | SDF2           | 0.26                      | 0.047 | 0.019    | 0.017                | -0.05 (-0.09, 0.01)  | 0.220 | 0.441         | -0.056   | 0.039      | 0.156               | 0.06 (-0.15, 0.02)       | -0.005 | 0.974   | 0.038     | 0.037   | 0.340               | 0.04 (-0.11, 0.04)       | -0.061           | 0.444 | 0.153               | -0.06 (-0.14, 0.02)   |                        |
| 15540.54      | TAGLN    | TAGLN          | 0.26                      | 0.048 | 0.019    | 0.017                | -0.05 (-0.09, 0.01)  | 0.220 | 1.102         | 0.006    | 0.038      | 0.041               | 0.04 (0.08, 0.08)        | 0.003  | 0.445   | 0.028     | 0.032   | 0.202               | 0.03 (0.01, 0.05)        | -0.019           | 0.437 | 0.612               | 0.02 (-0.09, 0.05)    |                        |
| 5744.12       | MENT     | CA056          | 0.26                      | 0.113 | 0.048    | 0.017                | -0.11 (-0.21, -0.02) | 0.220 | 657E-184      | 0.045    | 0.096      | 0.638               | -0.05 (-0.23, 0.14)      | -0.004 | 0.443   | 0.030     | 0.039   | 0.451               | -0.03 (-0.11, 0.05)      | -0.026           | 0.441 | 0.526               | -0.03 (-0.11, 0.05)   |                        |
| 15311.44      | DCN3     | DCN3           | 0.26                      | 0.045 | 0.019    | 0.017                | -0.05 (-0.09, 0.01)  | 0.220 | 0.840         | 0.066    | 0.038      | 0.348               | 0.04 (-0.14, 0.11)       | -0.005 | 0.751   | 0.016     | 0.031   | 0.917               | 0.02 (0.05, 0.09)        | -0.012           | 0.441 | 0.979               | 0.06 (-0.02, 0.08)    |                        |
| 5744.12       | MENT     | FLRT1          | 0.26                      | 0.043 | 0.018    | 0.017                | 0.04 (0.01, 0.08)    | 0.220 | 0.144         | 0.046    | 0.039      | 0.237               | 0.05 (-0.03, 0.12)       | -0.004 | 0.943   | 0.001     | 0.029   | 0.966               | -1.23e-03 (-0.06, 0)     | -0.045           | 0.440 | 0.259               | 0.04 (-0.12, 0.03)    |                        |
| 4697.59       | CSF2     | GM-CSF         | 0.26                      | 0.051 | 0.021    | 0.017                | -0.05 (-0.09, 0.01)  | 0.220 | 0.010         | -0.030   | 0.043      | 0.488               | -0.01 (-0.11, 0.05)      | -0.001 | 0.577   | -0.002    | 0.040   | 0.433               | -0.03 (-0.11, 0.05)      | -0.044           | 0.441 | 0.284               | -0.04 (-0.12, 0.04)   |                        |
| 8596.6        | PIANP    | PIANP          | 0.26                      | 0.042 | 0.018    | 0.017                | -0.05 (-0.09, 0.01)  | 0.220 | 0.142         | 0.003    | 0.038      | 0.800               | 0.16 (-0.03, 0.07, 0.08) | -0.003 | 0.440   | 0.036     | 0.037   | 0.325               | -0.01 (-0.11, 0.04)      | -0.042           | 0.437 | 0.835               | 0.05 (-0.13, 0.02)    |                        |
| 15573.110     | NCAN     | CSPG3          | 0.26                      | 0.056 | 0.024    | 0.017                | -0.06 (-0.10, 0.01)  | 0.221 | 2.316         | 0.105    | 0.047      | 0.467               | 0.03 (-0.06, 0.1)        | -0.006 | 0.028   | 0.001     | 0.033   | 0.986               | -1.34e-03 (-0.07, 0)     | -0.002           | 0.441 | 0.956               | 2.30e-03 (0.08, 0.08) |                        |
| 10825.12      | VSG10    | VSG10          | 0.26                      | 0.045 | 0.019    | 0.018                | -0.05 (-0.09, 0.01)  | 0.224 | 0.656         | 0.034    | 0.039      | 0.386               | 0.03 (-0.04, 0.1)        | -0.005 | 0.919   | 0.008     | 0.036   | 0.811               | -0.01 (-0.08, 0.06)      | -0.013           | 0.441 | 0.756               | -0.01 (-0.09, 0.07)   |                        |
| 7225.31       | MMST1    | PRM1           | 0.26                      | 0.050 | 0.021    | 0.018                | -0.05 (-0.09, 0.01)  | 0.227 | 0.017         | -0.043   | 0.043      | 0.322               | 0.04 (-0.13, 0.04)       | -0.005 | 0.838   | 0.007     | 0.039   | 0.859               | -0.01 (-0.08, 0.07)      | -0.015           | 0.443 | 0.733               | -0.01 (-0.10, 0.07)   |                        |
| 3415.61       | BSP      | BSP            | 0.26                      | 0.051 | 0.022    | 0.018                | -0.05 (-0.09, 0.01)  | 0.227 | 0.000         | 0.000    | 0.044      | 0.997               | 1.38e-04 (-0.09, 0.09)   | -0.003 | 0.176   | 0.028     | 0.040   | 0.485               | -0.03 (-0.11, 0.05)      | -0.025           | 0.439 | 0.522               | -0.03 (-0.10, 0.05)   |                        |
| 8698.60       | TNR8     | Tensin-x       | 0.26                      | 0.058 | 0.025    | 0.018                | -0.06 (-0.11, 0.01)  | 0.227 | 8.79E-05      | -0.020   | 0.017      | 0.684               | -0.02 (-0.11, 0.07)      | -0.002 | 0.397   | 0.015     | 0.015   | 0.872               | 0.01 (-0.08, 0.08)       | 0.008            | 0.444 | 0.866               | 0.01 (-0.08, 0.10)    |                        |
| 7050.5        | NEGR1    | NEGR1          | 0.26                      | 0.058 | 0.025    | 0.018                | -0.06 (-0.11, 0.01)  | 0.227 | 8.79E-05      | -0.020   | 0.017      | 0.684               | -0.02 (-0.11, 0.07)      | -0.002 | 0.397   | 0.015     | 0.015   | 0.872               | 0.01 (-0.08, 0.08)       | 0.008            | 0.444 | 0.866               | 0.01 (-0.08, 0.10)    |                        |
| 12461.8       | SIRT5    | SIRT5          | 0.26                      | 0.046 | 0.019    | 0.018                | -0.05 (-0.09, 0.01)  | 0.229 | 0.001         | -0.003   | 0.040      | 0.937               | -3.77e-03 (-0.08, 0.08)  | -0.003 | 0.221   | -0.007    | 0.037   | 0.856               | -0.01 (-0.08, 0.07)      | -0.038           | 0.442 | 0.363               | -0.04 (-0.12, 0.04)   |                        |
| 1315.15       | OPD2     | OPD2           | 0.26                      | 0.049 | 0.020    | 0.018                | -0.05 (-0.09, 0.01)  | 0.229 | 0.001         | -0.003   | 0.040      | 0.937               | -3.77e-03 (-0.08, 0.08)  | -0.003 | 0.221   | -0.007    | 0.037   | 0.856               | -0.01 (-0.08, 0.07)      | -0.038           | 0.442 | 0.363               | -0.04 (-0.12, 0.04)   |                        |
| 6022.57       | NELL2    | NELL2          | 0.26                      | 0.043 | 0.018    | 0.019                | -0.04 (-0.08, 0.01)  | 0.230 | 0.057         | 0.039    | 0.898      | 0.01 (-0.07, 0.08)  | -0.003                   | 0.160  | -0.008  | 0.033     | 0.809   | -0.01 (-0.07, 0.08) | -0.011                   | 0.439            | 0.772 | -0.01 (-0.09, 0.06) |                       |                        |
| 7784.8        | RNKL1    | Kinmeneg       | 0.26                      | 0.050 | 0.021    | 0.019                | 0.05 (0.01, 0.09)    | 0.233 | 0.036         | 0.046    | 0.433      | 0.287               | 0.05 (0.01, 0.11)        | 0.000  | 0.913   | 0.010     | 0.039   | 0.607               | 0.17 (-0.22e-03, 0.1)    | 0.061            | 0.440 | 0.128               | 0.06 (-0.02, 0.14)    |                        |
| 12530.8       | ARSP2    | ARSP2          | 0.26                      | 0.050 | 0.021    | 0.019                | 0.05 (0.01, 0.09)    | 0.234 | 0.065         | 0.046    | 0.433      | 0.287               | 0.05 (0.01, 0.11)        | 0.000  | 0.913   | 0.010     | 0.039   | 0.607               | 0.17 (-0.22e-03, 0.1)    | 0.061            | 0.440 | 0.128               | 0.06 (-0.02, 0.14)    |                        |
| 12514.16      | METTL1   | METTL1         | 0.26                      | 0.075 | 0.032    | 0.019                | 0.07 (0.01, 0.14)    | 0.235 | 1.44E-040     | 0.064    | 0.089      | 0.091               | 0.11 (-0.02, 0.24)       | -0.002 | 0.529   | 0.124     | 0.035   | 3.72E-04            | 0.12 (0.06, 0.19)        | 0.129            | 0.441 | 0.020               | 0.13 (0.05, 0.21)     |                        |
| 15793.12      | ARSP2    | ARSP2          | 0.26                      | 0.050 | 0.021    | 0.019                | 0.05 (0.01, 0.09)    | 0.235 | 0.065         | 0.046    | 0.433      | 0.287               | 0.05 (0.01, 0.11)        | 0.000  | 0.913   | 0.010     | 0.039   | 0.607               | 0.17 (-0.22e-03, 0.1)    | 0.061            | 0.440 | 0.128               | 0.06 (-0.02, 0.14)    |                        |
| 15530.33      | EPH4     | EPH4           | 0.26                      | 0.047 | 0.019    | 0.019                | -0.05 (-0.09, 0.01)  | 0.235 | 0.043         | 0.008    | 0.041      | 0.844               | 0.01 (-0.07, 0.09)       | -0.003 | 0.118   | -0.024    | 0.036   | 0.493               | -0.02 (-0.09, 0.05)      | -0.022           | 0.438 | 0.564               | -0.02 (-0.10, 0.05)   |                        |
| 8633.58       | CDH7     | CDH7           | 0.26                      | 0.042 | 0.018    | 0.019                | 0.04 (-0.01, 0.08)   | 0.236 | 0.603         | 0.035    | 0.036      | 0.333               | 0.04 (-0.04, 0.01)       | -0.000 | 0.826   | 0.120     | 0.037   | 0.887               | 0.01 (-0.05, 0.07)       | -0.008           | 0.440 | 0.840               | -0.01 (-0.09, 0.07)   |                        |
| 5240.69       | DLL1     | DLL1           | 0.26                      | 0.045 | 0.019    | 0.019                | 0.04 (-0.01, 0.08)   | 0.237 | 0.142         | 0.003    | 0.038      | 0.348               | 0.04 (-0.14, 0.06)       | -0.004 | 0.447   | 0.016     | 0.031   | 0.917               | 0.02 (0.05, 0.09)        | -0.012           | 0.441 | 0.979               | 0.06 (-0.02, 0.08)    |                        |
| 4537.60       | NLNAX    | NLNAX          | 0.26                      | 0.045 | 0.019    | 0.020                | -0.04 (-0.08, 0.01)  | 0.237 | 0.302         | 0.021    | 0.039      | 0.602               | 0.02 (-0.06, 0.1)        | -0.004 | 0.057   | 0.010     | 0.038   | 0.797               | -0.01 (-0.09, 0.07)      | -0.007           | 0.440 | 0.869               | -0.01 (-0.09, 0.07)   |                        |
| 18841.1       | SNRPB    | SNRPB          | 0.26                      | 0.044 | 0.019    | 0.020                | -0.04 (-0.08, 0.01)  | 0.238 | 0.058         | 0.018    | 0.041      | 0.655               | 0.02 (-0.11, 0.07)       | -0.004 | 0.079   | 0.023     | 0.031   | 0.464               | -0.02 (-0.08, 0.04)      | -0.005           | 0.439 | 0.899               | -0.01 (-0.09, 0.07)   |                        |
| 10756.34      | LOC3     | LOC3           | 0.26                      | 0.046 | 0.020    | 0.020                | -0.05 (-0.09, 0.01)  | 0.240 | 0.249         | 0.045    | 0.038      | 0.950               | 0.01 (-0.11, 0.07)       | -0.004 | 0.496   | 0.048     | 0.039   | 0.460               | -0.05 (-0.13, 0.02)      | -0.013           | 0.441 | 0.938               | -0.05 (-0.13, 0.02)   |                        |
| 7638.30       | LMAN2    | Lectin, man    | 0.26                      | 0.051 | 0.022    | 0.020                | 0.05 (0.01, 0.09)    | 0.239 | 0.005         | -0.020   | 0.044      | 0.641               | -0.02 (-0.11, 0.07)      | -0.004 | 0.062   | 0.020     | 0.037   | 0.593               | 0.02 (0.05, 0.09)        | 0.027            | 0.441 | 0.505               | 0.03 (0.01, 0.07)     |                        |
| 8653.132      | DNAX1    | DNAX1          | 0.26                      | 0.045 | 0.019    | 0.020                | 0.05 (0.01, 0.09)    | 0.239 | 0.132         | -0.008   | 0.041      | 0.848               | -0.01 (-0.09, 0.07)      | -0.004 | 0.137   | 0.009     | 0.037   | 0.804               | -0.0                     |                  |       |                     |                       |                        |



Table S5. Association of type 2 diabetes with Finnish plasma protein.

| SomaLogGE | Protein   | tsp           | Inverse variance weighted |       |        |       | MR Egger |                    |       |       | Weighted median |       |       |              | Weighted mode |       |       |      |        |       |               |        |      |       |       |               |
|-----------|-----------|---------------|---------------------------|-------|--------|-------|----------|--------------------|-------|-------|-----------------|-------|-------|--------------|---------------|-------|-------|------|--------|-------|---------------|--------|------|-------|-------|---------------|
|           |           |               | b1w                       | se1w  | pval1w | CI1w  | FDR_ZW   | Q                  | b1w   | se1w  | pval1w          | CI1w  | b1w   | se1w         | pval1w        | CI1w  | b1w   | se1w | pval1w | CI1w  |               |        |      |       |       |               |
| 8008_12   | DNAJB12   | DJB12         | 0.28                      | -0.40 | 0.19   | 0.034 | -0.04    | (-0.08, -2.93e-02) | 0.309 | 0.427 | -0.035          | 0.387 | 0.673 | (0.11, 0.04) | 0.002         | 0.874 | -0.44 | 0.39 | 0.257  | -0.04 | (-0.12, 0.03) | -0.051 | 0.40 | 0.197 | -0.05 | (-0.13, 0.03) |
| 9191_2    | TFPI      | TFPI          | 0.28                      | -0.40 | 0.19   | 0.034 | -0.04    | (-0.08, -2.93e-02) | 0.309 | 0.427 | -0.035          | 0.387 | 0.673 | (0.11, 0.04) | 0.002         | 0.874 | -0.44 | 0.39 | 0.257  | -0.04 | (-0.12, 0.03) | -0.051 | 0.40 | 0.197 | -0.05 | (-0.13, 0.03) |
| 9211_19   | SRPFP1    | PFDF          | 0.28                      | -0.40 | 0.19   | 0.034 | -0.04    | (-0.08, -2.93e-02) | 0.309 | 0.427 | -0.035          | 0.387 | 0.673 | (0.11, 0.04) | 0.002         | 0.874 | -0.44 | 0.39 | 0.257  | -0.04 | (-0.12, 0.03) | -0.051 | 0.40 | 0.197 | -0.05 | (-0.13, 0.03) |
| 10342_55  | SRPFP1    | PFDF          | 0.28                      | -0.40 | 0.19   | 0.034 | -0.04    | (-0.08, -2.93e-02) | 0.309 | 0.427 | -0.035          | 0.387 | 0.673 | (0.11, 0.04) | 0.002         | 0.874 | -0.44 | 0.39 | 0.257  | -0.04 | (-0.12, 0.03) | -0.051 | 0.40 | 0.197 | -0.05 | (-0.13, 0.03) |
| 11192_168 | TM6SF1    | TM6SF1        | 0.28                      | -0.40 | 0.19   | 0.034 | -0.04    | (-0.08, -2.93e-02) | 0.309 | 0.427 | -0.035          | 0.387 | 0.673 | (0.11, 0.04) | 0.002         | 0.874 | -0.44 | 0.39 | 0.257  | -0.04 | (-0.12, 0.03) | -0.051 | 0.40 | 0.197 | -0.05 | (-0.13, 0.03) |
| 11426_58  | SOCS3     | SOCS3         | 0.28                      | -0.40 | 0.19   | 0.034 | -0.04    | (-0.08, -2.93e-02) | 0.309 | 0.427 | -0.035          | 0.387 | 0.673 | (0.11, 0.04) | 0.002         | 0.874 | -0.44 | 0.39 | 0.257  | -0.04 | (-0.12, 0.03) | -0.051 | 0.40 | 0.197 | -0.05 | (-0.13, 0.03) |
| 15326_64  | GBP1      | GBP1          | 0.28                      | -0.40 | 0.19   | 0.034 | -0.04    | (-0.08, -2.93e-02) | 0.309 | 0.427 | -0.035          | 0.387 | 0.673 | (0.11, 0.04) | 0.002         | 0.874 | -0.44 | 0.39 | 0.257  | -0.04 | (-0.12, 0.03) | -0.051 | 0.40 | 0.197 | -0.05 | (-0.13, 0.03) |
| 17822_37  | REGR      | REGR          | 0.28                      | -0.40 | 0.19   | 0.034 | -0.04    | (-0.08, -2.93e-02) | 0.309 | 0.427 | -0.035          | 0.387 | 0.673 | (0.11, 0.04) | 0.002         | 0.874 | -0.44 | 0.39 | 0.257  | -0.04 | (-0.12, 0.03) | -0.051 | 0.40 | 0.197 | -0.05 | (-0.13, 0.03) |
| 5459_33   | CST3      | CYN7          | 0.28                      | -0.40 | 0.19   | 0.034 | -0.04    | (-0.08, -2.93e-02) | 0.309 | 0.427 | -0.035          | 0.387 | 0.673 | (0.11, 0.04) | 0.002         | 0.874 | -0.44 | 0.39 | 0.257  | -0.04 | (-0.12, 0.03) | -0.051 | 0.40 | 0.197 | -0.05 | (-0.13, 0.03) |
| 6252_62   | SCGB1A1   | Secretoglobin | 0.28                      | -0.40 | 0.19   | 0.034 | -0.04    | (-0.08, -2.93e-02) | 0.309 | 0.427 | -0.035          | 0.387 | 0.673 | (0.11, 0.04) | 0.002         | 0.874 | -0.44 | 0.39 | 0.257  | -0.04 | (-0.12, 0.03) | -0.051 | 0.40 | 0.197 | -0.05 | (-0.13, 0.03) |
| 6901_28   | EGLN1     | EGLN1         | 0.28                      | -0.40 | 0.19   | 0.034 | -0.04    | (-0.08, -2.93e-02) | 0.309 | 0.427 | -0.035          | 0.387 | 0.673 | (0.11, 0.04) | 0.002         | 0.874 | -0.44 | 0.39 | 0.257  | -0.04 | (-0.12, 0.03) | -0.051 | 0.40 | 0.197 | -0.05 | (-0.13, 0.03) |
| 13307_51  | TRAD      | TRADD         | 0.28                      | -0.40 | 0.19   | 0.034 | -0.04    | (-0.08, -2.93e-02) | 0.309 | 0.427 | -0.035          | 0.387 | 0.673 | (0.11, 0.04) | 0.002         | 0.874 | -0.44 | 0.39 | 0.257  | -0.04 | (-0.12, 0.03) | -0.051 | 0.40 | 0.197 | -0.05 | (-0.13, 0.03) |
| 5035_35   | TYMS      | TYMS          | 0.28                      | -0.40 | 0.19   | 0.034 | -0.04    | (-0.08, -2.93e-02) | 0.309 | 0.427 | -0.035          | 0.387 | 0.673 | (0.11, 0.04) | 0.002         | 0.874 | -0.44 | 0.39 | 0.257  | -0.04 | (-0.12, 0.03) | -0.051 | 0.40 | 0.197 | -0.05 | (-0.13, 0.03) |
| 6690_49   | TUT1      | TUT1          | 0.28                      | -0.40 | 0.19   | 0.034 | -0.04    | (-0.08, -2.93e-02) | 0.309 | 0.427 | -0.035          | 0.387 | 0.673 | (0.11, 0.04) | 0.002         | 0.874 | -0.44 | 0.39 | 0.257  | -0.04 | (-0.12, 0.03) | -0.051 | 0.40 | 0.197 | -0.05 | (-0.13, 0.03) |
| 15398_24  | FCGR3A    | FcR1a         | 0.28                      | -0.40 | 0.19   | 0.034 | -0.04    | (-0.08, -2.93e-02) | 0.309 | 0.427 | -0.035          | 0.387 | 0.673 | (0.11, 0.04) | 0.002         | 0.874 | -0.44 | 0.39 | 0.257  | -0.04 | (-0.12, 0.03) | -0.051 | 0.40 | 0.197 | -0.05 | (-0.13, 0.03) |
| 8697_3    | LRRRC12   | LRR12         | 0.28                      | -0.40 | 0.19   | 0.034 | -0.04    | (-0.08, -2.93e-02) | 0.309 | 0.427 | -0.035          | 0.387 | 0.673 | (0.11, 0.04) | 0.002         | 0.874 | -0.44 | 0.39 | 0.257  | -0.04 | (-0.12, 0.03) | -0.051 | 0.40 | 0.197 | -0.05 | (-0.13, 0.03) |
| 12452_32  | SUW42H2   | SUW42H2       | 0.28                      | -0.40 | 0.19   | 0.034 | -0.04    | (-0.08, -2.93e-02) | 0.309 | 0.427 | -0.035          | 0.387 | 0.673 | (0.11, 0.04) | 0.002         | 0.874 | -0.44 | 0.39 | 0.257  | -0.04 | (-0.12, 0.03) | -0.051 | 0.40 | 0.197 | -0.05 | (-0.13, 0.03) |
| 18917_53  | AMV2A     | Pancreatic    | 0.28                      | -0.40 | 0.19   | 0.034 | -0.04    | (-0.08, -2.93e-02) | 0.309 | 0.427 | -0.035          | 0.387 | 0.673 | (0.11, 0.04) | 0.002         | 0.874 | -0.44 | 0.39 | 0.257  | -0.04 | (-0.12, 0.03) | -0.051 | 0.40 | 0.197 | -0.05 | (-0.13, 0.03) |
| 18554_50  | TM6SF1    | TM6SF1        | 0.28                      | -0.40 | 0.19   | 0.034 | -0.04    | (-0.08, -2.93e-02) | 0.309 | 0.427 | -0.035          | 0.387 | 0.673 | (0.11, 0.04) | 0.002         | 0.874 | -0.44 | 0.39 | 0.257  | -0.04 | (-0.12, 0.03) | -0.051 | 0.40 | 0.197 | -0.05 | (-0.13, 0.03) |
| 7003_4    | GALNT10   | GLT10         | 0.28                      | -0.40 | 0.19   | 0.034 | -0.04    | (-0.08, -2.93e-02) | 0.309 | 0.427 | -0.035          | 0.387 | 0.673 | (0.11, 0.04) | 0.002         | 0.874 | -0.44 | 0.39 | 0.257  | -0.04 | (-0.12, 0.03) | -0.051 | 0.40 | 0.197 | -0.05 | (-0.13, 0.03) |
| 7828_1    | DCLK1     | DCLK1         | 0.28                      | -0.40 | 0.19   | 0.034 | -0.04    | (-0.08, -2.93e-02) | 0.309 | 0.427 | -0.035          | 0.387 | 0.673 | (0.11, 0.04) | 0.002         | 0.874 | -0.44 | 0.39 | 0.257  | -0.04 | (-0.12, 0.03) | -0.051 | 0.40 | 0.197 | -0.05 | (-0.13, 0.03) |
| 7887_154  | STGALNA1A | STGALNA1A     | 0.28                      | -0.40 | 0.19   | 0.034 | -0.04    | (-0.08, -2.93e-02) | 0.309 | 0.427 | -0.035          | 0.387 | 0.673 | (0.11, 0.04) | 0.002         | 0.874 | -0.44 | 0.39 | 0.257  | -0.04 | (-0.12, 0.03) | -0.051 | 0.40 | 0.197 | -0.05 | (-0.13, 0.03) |
| 9332_6    | DEFB3     | DEFB3         | 0.28                      | -0.40 | 0.19   | 0.034 | -0.04    | (-0.08, -2.93e-02) | 0.309 | 0.427 | -0.035          | 0.387 | 0.673 | (0.11, 0.04) | 0.002         | 0.874 | -0.44 | 0.39 | 0.257  | -0.04 | (-0.12, 0.03) | -0.051 | 0.40 | 0.197 | -0.05 | (-0.13, 0.03) |
| 9359_9    | DLK2      | EGLF9         | 0.28                      | -0.40 | 0.19   | 0.034 | -0.04    | (-0.08, -2.93e-02) | 0.309 | 0.427 | -0.035          | 0.387 | 0.673 | (0.11, 0.04) | 0.002         | 0.874 | -0.44 | 0.39 | 0.257  | -0.04 | (-0.12, 0.03) | -0.051 | 0.40 | 0.197 | -0.05 | (-0.13, 0.03) |
| 12802_1   | GRAP      | GRAP          | 0.28                      | -0.40 | 0.19   | 0.034 | -0.04    | (-0.08, -2.93e-02) | 0.309 | 0.427 | -0.035          | 0.387 | 0.673 | (0.11, 0.04) | 0.002         | 0.874 | -0.44 | 0.39 | 0.257  | -0.04 | (-0.12, 0.03) | -0.051 | 0.40 | 0.197 | -0.05 | (-0.13, 0.03) |
| 8853_2    | CLEC4A    | CLEC4A        | 0.28                      | -0.40 | 0.19   | 0.034 | -0.04    | (-0.08, -2.93e-02) | 0.309 | 0.427 | -0.035          | 0.387 | 0.673 | (0.11, 0.04) | 0.002         | 0.874 | -0.44 | 0.39 | 0.257  | -0.04 | (-0.12, 0.03) | -0.051 | 0.40 | 0.197 | -0.05 | (-0.13, 0.03) |
| 9370_69   | GGH       | GGH           | 0.28                      | -0.40 | 0.19   | 0.034 | -0.04    | (-0.08, -2.93e-02) | 0.309 | 0.427 | -0.035          | 0.387 | 0.673 | (0.11, 0.04) | 0.002         | 0.874 | -0.44 | 0.39 | 0.257  | -0.04 | (-0.12, 0.03) | -0.051 | 0.40 | 0.197 | -0.05 | (-0.13, 0.03) |
| 13893_6   | FOXP3     | FOXP3         | 0.28                      | -0.40 | 0.19   | 0.034 | -0.04    | (-0.08, -2.93e-02) | 0.309 | 0.427 | -0.035          | 0.387 | 0.673 | (0.11, 0.04) | 0.002         | 0.874 | -0.44 | 0.39 | 0.257  | -0.04 | (-0.12, 0.03) | -0.051 | 0.40 | 0.197 | -0.05 | (-0.13, 0.03) |
| 4549_78   | FUT5      | FUT5          | 0.28                      | -0.40 | 0.19   | 0.034 | -0.04    | (-0.08, -2.93e-02) | 0.309 | 0.427 | -0.035          | 0.387 | 0.673 | (0.11, 0.04) | 0.002         | 0.874 | -0.44 | 0.39 | 0.257  | -0.04 | (-0.12, 0.03) | -0.051 | 0.40 | 0.197 | -0.05 | (-0.13, 0.03) |
| 5644_60   | RNASE4    | RNASE4        | 0.28                      | -0.40 | 0.19   | 0.034 | -0.04    | (-0.08, -2.93e-02) | 0.309 | 0.427 | -0.035          | 0.387 | 0.673 | (0.11, 0.04) | 0.002         | 0.874 | -0.44 | 0.39 | 0.257  | -0.04 | (-0.12, 0.03) | -0.051 | 0.40 | 0.197 | -0.05 | (-0.13, 0.03) |
| 11552_27  | PFARCB1   | PFARCB1       | 0.28                      | -0.40 | 0.19   | 0.034 | -0.04    | (-0.08, -2.93e-02) | 0.309 | 0.427 | -0.035          | 0.387 | 0.673 | (0.11, 0.04) | 0.002         | 0.874 | -0.44 | 0.39 | 0.257  | -0.04 | (-0.12, 0.03) | -0.051 | 0.40 | 0.197 | -0.05 | (-0.13, 0.03) |
| 7108_37   | OOSP2     | PLACL1        | 0.28                      | -0.40 | 0.19   | 0.034 | -0.04    | (-0.08, -2.93e-02) | 0.309 | 0.427 | -0.035          | 0.387 | 0.673 | (0.11, 0.04) | 0.002         | 0.874 | -0.44 | 0.39 | 0.257  | -0.04 | (-0.12, 0.03) | -0.051 | 0.40 | 0.197 | -0.05 | (-0.13, 0.03) |
| 9231_23   | IMPAD1    | IMPAD1        | 0.28                      | -0.40 | 0.19   | 0.034 | -0.04    | (-0.08, -2.93e-02) | 0.309 | 0.427 | -0.035          | 0.387 | 0.673 | (0.11, 0.04) | 0.002         | 0.874 | -0.44 | 0.39 | 0.257  | -0.04 | (-0.12, 0.03) | -0.051 | 0.40 | 0.197 | -0.05 | (-0.13, 0.03) |
| 10424_31  | NPPD      | NPPD          | 0.28                      | -0.40 | 0.19   | 0.034 | -0.04    | (-0.08, -2.93e-02) | 0.309 | 0.427 | -0.035          | 0.387 | 0.673 | (0.11, 0.04) | 0.002         | 0.874 | -0.44 | 0.39 | 0.257  | -0.04 | (-0.12, 0.03) | -0.051 | 0.40 | 0.197 | -0.05 | (-0.13, 0.03) |
| 10515_2   | HSPG2     | HSPG2         | 0.28                      | -0.40 | 0.19   | 0.034 | -0.04    | (-0.08, -2.93e-02) | 0.309 | 0.427 | -0.035          | 0.387 | 0.673 | (0.11, 0.04) | 0.002         | 0.874 | -0.44 | 0.39 | 0.257  | -0.04 | (-0.12, 0.03) | -0.051 | 0.40 | 0.197 | -0.05 | (-0.13, 0.03) |
| 12708_91  | LMBL1     | LMBL1         | 0.28                      | -0.40 | 0.19   | 0.034 | -0.04    | (-0.08, -2.93e-02) | 0.309 | 0.427 | -0.035          | 0.387 | 0.673 | (0.11, 0.04) | 0.002         | 0.874 | -0.44 | 0.39 | 0.257  | -0.04 | (-0.12, 0.03) | -0.051 | 0.40 | 0.197 | -0.05 | (-0.13, 0.03) |
| 13614_6   | CREBBP    | CREBBP        | 0.28                      | -0.40 | 0.19   | 0.034 | -0.04    | (-0.08, -2.93e-02) | 0.309 | 0.427 | -0.035          | 0.387 | 0.673 | (0.11, 0.04) | 0.002         | 0.874 | -0.44 | 0.39 | 0.257  | -0.04 | (-0.12, 0.03) | -0.051 | 0.40 | 0.197 | -0.05 | (-0.13, 0.03) |
| 17175_5   | HAP2      | HAP2          | 0.28                      | -0.40 | 0.19   | 0.034 | -0.04    | (-0.08, -2.93e-02) | 0.309 | 0.427 | -0.035          | 0.387 | 0.673 | (0.11, 0.04) | 0.002         |       |       |      |        |       |               |        |      |       |       |               |

Table S5. Association of type 2 diabetes with Ferland plasma protein.

| Locus     | SNP      | Protein     | rsnp | Inverse variance weights |       |         |      | MR Egger |      |       |        | Weighted median |       |          |               | Weighted mode |             |        |         |          |       |       |           |       |       |       |        |       |          |       |       |      |
|-----------|----------|-------------|------|--------------------------|-------|---------|------|----------|------|-------|--------|-----------------|-------|----------|---------------|---------------|-------------|--------|---------|----------|-------|-------|-----------|-------|-------|-------|--------|-------|----------|-------|-------|------|
|           |          |             |      | b/w                      | se/bw | pval/iw | OR   | FOR_Z    | Q    | pval  | segger | pval/egger      | egger | integger | pval/integger | se/integger   | pval/median | b.mode | se.mode | pval/med | Cmode |       |           |       |       |       |        |       |          |       |       |      |
| 12999.134 | CCDC50   | CCDC50      | 226  | 0.034                    | 0.017 | 0.059   | 0.13 | -0.28    | 0.07 | 0.396 | 0.000  | 0.13            | 0.039 | 0.737    | 0.01          | 0.08          | 0.09        | 0.001  | 0.532   | -0.004   | 0.322 | 0.001 | -3.95e-03 | 0.07  | 0.0   | 0.008 | 0.037  | 0.822 | 0.01     | 0.06  | 0.08  |      |
| 13003.7   | HFDSD    | HFDSD       | 226  | 0.034                    | 0.017 | 0.059   | 0.13 | -0.28    | 0.07 | 0.396 | 0.000  | 0.13            | 0.039 | 0.737    | 0.01          | 0.08          | 0.09        | 0.001  | 0.532   | -0.004   | 0.322 | 0.001 | -3.95e-03 | 0.07  | 0.0   | 0.008 | 0.037  | 0.822 | 0.01     | 0.06  | 0.08  |      |
| 15827.20  | FOXL2    | FOXL2       | 226  | 0.036                    | 0.019 | 0.061   | 0.04 | -0.16    | 0.03 | 0.396 | 0.554  | 0.034           | 0.039 | 0.372    | 0.03          | -0.04         | 0.11        | 0.000  | 0.895   | 0.016    | 0.337 | 0.007 | 0.677     | 0.02  | -0.08 | 0.09  | 0.039  | 0.40  | 0.38     | 0.04  | 0.11  |      |
| 15830.20  | RODR     | RODR        | 226  | 0.040                    | 0.021 | 0.081   | 0.04 | -0.08    | 0.03 | 0.396 | 2.836  | 0.06            | 0.041 | 0.06     | 0.01          | -0.08         | 0.11        | 0.000  | 0.895   | 0.016    | 0.337 | 0.007 | 0.677     | 0.02  | -0.08 | 0.09  | 0.039  | 0.40  | 0.38     | 0.04  | 0.11  |      |
| 16780.6   | HSP1A1   | HSP1A1      | 226  | 0.034                    | 0.017 | 0.059   | 0.13 | -0.28    | 0.07 | 0.396 | 0.000  | 0.13            | 0.039 | 0.737    | 0.01          | 0.08          | 0.09        | 0.001  | 0.532   | -0.004   | 0.322 | 0.001 | -3.95e-03 | 0.07  | 0.0   | 0.008 | 0.037  | 0.822 | 0.01     | 0.06  | 0.08  |      |
| 17346.61  | FDSP     | FDSP        | 226  | 0.040                    | 0.021 | 0.081   | 0.04 | -0.08    | 0.03 | 0.396 | 0.014  | -0.036          | 0.043 | 0.405    | 0.04          | -0.12         | 0.05        | 0.000  | 0.895   | 0.016    | 0.337 | 0.007 | 0.677     | 0.02  | -0.08 | 0.09  | 0.039  | 0.40  | 0.38     | 0.04  | 0.11  |      |
| 17346.61  | FDSP     | FDSP        | 226  | 0.040                    | 0.021 | 0.081   | 0.04 | -0.08    | 0.03 | 0.396 | 0.014  | -0.036          | 0.043 | 0.405    | 0.04          | -0.12         | 0.05        | 0.000  | 0.895   | 0.016    | 0.337 | 0.007 | 0.677     | 0.02  | -0.08 | 0.09  | 0.039  | 0.40  | 0.38     | 0.04  | 0.11  |      |
| 17785.11  | ROL      | ROL         | 226  | 0.036                    | 0.019 | 0.061   | 0.04 | -0.16    | 0.03 | 0.396 | 0.723  | 0.007           | 0.037 | 0.847    | 0.01          | -0.08         | 0.08        | 0.000  | 0.895   | 0.016    | 0.337 | 0.007 | 0.677     | 0.02  | -0.08 | 0.09  | 0.039  | 0.40  | 0.38     | 0.04  | 0.11  |      |
| 18061.26  | HSP1B    | HSP1B       | 226  | 0.039                    | 0.021 | 0.086   | 0.04 | -0.17    | 0.03 | 0.396 | 0.005  | 0.025           | 0.042 | 0.553    | 0.02          | -0.06         | 0.11        | 0.001  | 0.699   | 0.015    | 0.338 | 0.009 | 0.611     | 0.01  | -0.09 | 0.09  | -0.015 | 0.38  | 0.63     | 0.01  | -0.09 | 0.06 |
| 2558.51   | POMA     | E-endorphin | 226  | 0.036                    | 0.019 | 0.061   | 0.04 | -0.16    | 0.03 | 0.396 | 0.579  | 0.032           | 0.039 | 0.419    | 0.03          | -0.05         | 0.11        | 0.004  | 0.846   | 0.029    | 0.338 | 0.009 | 0.611     | 0.01  | -0.09 | 0.09  | 0.034  | 0.43  | 0.26     | 0.03  | -0.12 |      |
| 2590.63   | MPD      | MPD         | 226  | 0.035                    | 0.018 | 0.060   | 0.04 | -0.16    | 0.03 | 0.396 | 0.441  | 0.016           | 0.016 | 0.151    | 0.01          | -0.12         | 0.05        | 0.003  | 0.846   | 0.029    | 0.338 | 0.009 | 0.611     | 0.01  | -0.09 | 0.09  | 0.034  | 0.43  | 0.26     | 0.03  | -0.12 |      |
| 2838.2    | TNFSF4   | CD40 Ligand | 226  | 0.037                    | 0.020 | 0.059   | 0.04 | -0.08    | 0.03 | 0.396 | 0.575  | -0.025          | 0.039 | 0.532    | -0.02         | -0.10         | 0.05        | 0.001  | 0.721   | -0.015   | 0.440 | 0.007 | -0.02     | -0.08 | 0.09  | 0.001 | 0.39   | 0.97  | 1.42e-03 | -0.08 | 0.08  |      |
| 2970.60   | AREG     | AREG        | 226  | 0.034                    | 0.018 | 0.060   | 0.04 | -0.16    | 0.03 | 0.396 | 0.481  | 0.028           | 0.037 | 0.448    | 0.03          | -0.04         | 0.10        | 0.000  | 0.847   | -0.011   | 0.331 | 0.007 | 0.677     | 0.02  | -0.08 | 0.09  | 0.039  | 0.40  | 0.38     | 0.04  | 0.11  |      |
| 3348.49   | BMF1     | BMF1        | 226  | 0.034                    | 0.018 | 0.060   | 0.04 | -0.16    | 0.03 | 0.396 | 0.084  | 0.050           | 0.039 | 0.156    | 0.03          | -0.13         | 0.05        | 0.001  | 0.677   | 0.020    | 0.331 | 0.007 | 0.677     | 0.02  | -0.08 | 0.09  | 0.039  | 0.40  | 0.38     | 0.04  | 0.11  |      |
| 3403.1    | TPS28    | TPS28       | 226  | 0.036                    | 0.019 | 0.061   | 0.04 | -0.16    | 0.03 | 0.396 | 2.229  | 0.001           | 0.040 | 0.978    | 0.09          | -0.08         | 0.08        | 0.002  | 0.286   | 0.037    | 0.441 | 0.009 | 0.611     | 0.01  | -0.09 | 0.09  | 0.034  | 0.43  | 0.26     | 0.03  | -0.12 |      |
| 5020.2    | PAM      | PAM         | 226  | 0.036                    | 0.019 | 0.061   | 0.04 | -0.16    | 0.03 | 0.396 | 0.006  | 0.010           | 0.123 | 0.165    | 0.17          | -0.41         | 0.07        | 0.000  | 0.599   | 0.011    | 0.332 | 0.007 | 0.677     | 0.02  | -0.08 | 0.09  | 0.039  | 0.40  | 0.38     | 0.04  | 0.11  |      |
| 5632.6    | CRAC1    | CRAC1       | 226  | 0.036                    | 0.019 | 0.061   | 0.04 | -0.16    | 0.03 | 0.396 | 0.005  | 0.025           | 0.040 | 0.565    | 0.02          | -0.10         | 0.05        | 0.000  | 0.846   | 0.029    | 0.338 | 0.009 | 0.611     | 0.01  | -0.09 | 0.09  | 0.034  | 0.43  | 0.26     | 0.03  | -0.12 |      |
| 6533.20   | DNAH2B   | DNAH2B      | 226  | 0.036                    | 0.019 | 0.061   | 0.04 | -0.16    | 0.03 | 0.396 | 0.281  | 0.013           | 0.040 | 0.752    | 0.01          | -0.07         | 0.09        | -0.003 | 0.159   | 0.005    | 0.337 | 0.007 | 0.677     | 0.02  | -0.08 | 0.09  | 0.039  | 0.40  | 0.38     | 0.04  | 0.11  |      |
| 6571.5    | C11orf78 | C11orf78    | 226  | 0.034                    | 0.018 | 0.060   | 0.04 | -0.16    | 0.03 | 0.396 | 0.066  | 0.025           | 0.040 | 0.752    | 0.01          | -0.07         | 0.09        | 0.001  | 0.534   | 0.013    | 0.332 | 0.007 | 0.677     | 0.02  | -0.08 | 0.09  | 0.039  | 0.40  | 0.38     | 0.04  | 0.11  |      |
| 7196.21   | FNW      | FNW         | 226  | 0.037                    | 0.020 | 0.059   | 0.04 | -0.08    | 0.03 | 0.396 | 0.588  | -0.022          | 0.039 | 0.587    | -0.02         | -0.10         | 0.05        | 0.001  | 0.679   | -0.021   | 0.339 | 0.009 | 0.588     | -0.02 | -0.10 | 0.05  | 0.008  | 0.39  | 0.83     | 0.01  | -0.08 | 0.07 |
| 8222.49   | CHDR3    | CHDR3       | 226  | 0.036                    | 0.019 | 0.061   | 0.04 | -0.16    | 0.03 | 0.396 | 0.511  | -0.002          | 0.038 | 0.984    | -1.79         | -0.08         | 0.07        | 0.002  | 0.305   | -0.007   | 0.336 | 0.007 | 0.677     | 0.02  | -0.08 | 0.09  | 0.039  | 0.40  | 0.38     | 0.04  | 0.11  |      |
| 8632.25   | BS12     | BS12        | 226  | 0.036                    | 0.019 | 0.061   | 0.04 | -0.16    | 0.03 | 0.396 | 0.006  | 0.025           | 0.040 | 0.752    | 0.01          | -0.07         | 0.09        | 0.001  | 0.534   | 0.013    | 0.332 | 0.007 | 0.677     | 0.02  | -0.08 | 0.09  | 0.039  | 0.40  | 0.38     | 0.04  | 0.11  |      |
| 8907.8    | CNHR3    | CNHR3       | 226  | 0.036                    | 0.019 | 0.061   | 0.04 | -0.16    | 0.03 | 0.396 | 0.538  | 0.006           | 0.038 | 0.984    | -1.79         | -0.08         | 0.07        | 0.002  | 0.305   | -0.007   | 0.336 | 0.007 | 0.677     | 0.02  | -0.08 | 0.09  | 0.039  | 0.40  | 0.38     | 0.04  | 0.11  |      |
| 9297.12   | BSG2B    | BSG2B       | 226  | 0.039                    | 0.021 | 0.081   | 0.04 | -0.17    | 0.03 | 0.396 | 0.118  | 0.022           | 0.042 | 0.600    | 0.02          | -0.08         | 0.10        | 0.004  | 0.094   | -0.018   | 0.337 | 0.007 | 0.677     | 0.02  | -0.08 | 0.09  | 0.039  | 0.40  | 0.38     | 0.04  | 0.11  |      |
| 9432.27   | FST      | FST         | 226  | 0.036                    | 0.019 | 0.061   | 0.04 | -0.16    | 0.03 | 0.396 | 0.274  | 0.026           | 0.039 | 0.323    | 0.03          | -0.05         | 0.10        | 0.001  | 0.850   | 0.025    | 0.332 | 0.007 | 0.677     | 0.02  | -0.08 | 0.09  | 0.039  | 0.40  | 0.38     | 0.04  | 0.11  |      |
| 9327.3    | LYPD1    | LYPD1       | 226  | 0.036                    | 0.019 | 0.061   | 0.04 | -0.16    | 0.03 | 0.396 | 0.666  | 0.011           | 0.039 | 0.777    | 0.01          | -0.07         | 0.09        | -0.003 | 0.184   | -0.038   | 0.330 | 0.007 | 0.677     | 0.02  | -0.08 | 0.09  | 0.039  | 0.40  | 0.38     | 0.04  | 0.11  |      |
| 9327.3    | LYPD1    | LYPD1       | 226  | 0.036                    | 0.019 | 0.061   | 0.04 | -0.16    | 0.03 | 0.396 | 0.666  | 0.011           | 0.039 | 0.777    | 0.01          | -0.07         | 0.09        | -0.003 | 0.184   | -0.038   | 0.330 | 0.007 | 0.677     | 0.02  | -0.08 | 0.09  | 0.039  | 0.40  | 0.38     | 0.04  | 0.11  |      |
| 9327.3    | LYPD1    | LYPD1       | 226  | 0.036                    | 0.019 | 0.061   | 0.04 | -0.16    | 0.03 | 0.396 | 0.666  | 0.011           | 0.039 | 0.777    | 0.01          | -0.07         | 0.09        | -0.003 | 0.184   | -0.038   | 0.330 | 0.007 | 0.677     | 0.02  | -0.08 | 0.09  | 0.039  | 0.40  | 0.38     | 0.04  | 0.11  |      |
| 9327.3    | LYPD1    | LYPD1       | 226  | 0.036                    | 0.019 | 0.061   | 0.04 | -0.16    | 0.03 | 0.396 | 0.666  | 0.011           | 0.039 | 0.777    | 0.01          | -0.07         | 0.09        | -0.003 | 0.184   | -0.038   | 0.330 | 0.007 | 0.677     | 0.02  | -0.08 | 0.09  | 0.039  | 0.40  | 0.38     | 0.04  | 0.11  |      |
| 9327.3    | LYPD1    | LYPD1       | 226  | 0.036                    | 0.019 | 0.061   | 0.04 | -0.16    | 0.03 | 0.396 | 0.666  | 0.011           | 0.039 | 0.777    | 0.01          | -0.07         | 0.09        | -0.003 | 0.184   | -0.038   | 0.330 | 0.007 | 0.677     | 0.02  | -0.08 | 0.09  | 0.039  | 0.40  | 0.38     | 0.04  | 0.11  |      |
| 9327.3    | LYPD1    | LYPD1       | 226  | 0.036                    | 0.019 | 0.061   | 0.04 | -0.16    | 0.03 | 0.396 | 0.666  | 0.011           | 0.039 | 0.777    | 0.01          | -0.07         | 0.09        | -0.003 | 0.184   | -0.038   | 0.330 | 0.007 | 0.677     | 0.02  | -0.08 | 0.09  | 0.039  | 0.40  | 0.38     | 0.04  | 0.11  |      |
| 9327.3    | LYPD1    | LYPD1       | 226  | 0.036                    | 0.019 | 0.061   | 0.04 | -0.16    | 0.03 | 0.396 | 0.666  | 0.011           | 0.039 | 0.777    | 0.01          | -0.07         | 0.09        | -0.003 | 0.184   | -0.038   | 0.330 | 0.007 | 0.677     | 0.02  | -0.08 | 0.09  | 0.039  | 0.40  | 0.38     | 0.04  | 0.11  |      |
| 9327.3    | LYPD1    | LYPD1       | 226  | 0.036                    | 0.019 | 0.061   | 0.04 | -0.16    | 0.03 | 0.396 | 0.666  | 0.011           | 0.039 | 0.777    | 0.01          | -0.07         | 0.09        | -0.003 | 0.184   | -0.038   | 0.330 | 0.007 | 0.677     | 0.02  | -0.08 | 0.09  | 0.039  | 0.40  | 0.38     | 0.04  | 0.11  |      |
| 9327.3    | LYPD1    | LYPD1       | 226  | 0.036                    | 0.019 | 0.061   | 0.04 | -0.16    | 0.03 | 0.396 | 0.666  | 0.011           | 0.039 | 0.777    | 0.01          | -0.07         | 0.09        | -0.003 | 0.184   | -0.038   | 0.330 | 0.007 | 0.677     | 0.02  | -0.08 | 0.09  | 0.039  | 0.40  | 0.38     | 0.04  | 0.11  |      |
| 9327.3    | LYPD1    | LYPD1       | 226  | 0.036                    | 0.019 | 0.061   | 0.04 | -0.16    | 0.03 | 0.396 | 0.666  | 0.011           | 0.039 | 0.777    | 0.01          | -0.07         | 0.09        | -0.003 | 0.184   | -0.038   | 0.330 | 0.007 | 0.677     | 0.02  | -0.08 | 0.09  | 0.039  | 0.40  | 0.38     | 0.04  | 0.11  |      |
| 9327.3    | LYPD1    | LYPD1       | 226  | 0.036                    | 0.019 | 0.061   | 0.04 | -0.16    | 0.03 | 0.396 | 0.666  | 0.011           | 0.039 | 0.777    | 0.01          | -0.07         | 0.09        | -0.003 | 0.184   | -0.038   | 0.330 | 0.007 | 0.677     | 0.02  | -0.08 | 0.09  | 0.039  | 0.40  | 0.38     | 0.04  | 0.11  |      |
| 9327.3    | LYPD1    | LYPD1       | 226  | 0.036                    | 0.019 | 0.061   | 0.04 | -0.16    | 0.03 | 0.396 | 0.666  | 0.011           | 0.039 | 0.777    | 0.01          | -0.07         | 0.09        | -0.003 | 0.184   | -0.038   | 0.330 | 0.007 | 0.677     | 0.02  | -0.08 | 0.09  | 0.039  | 0.40  | 0.38     | 0.04  | 0.11  |      |
| 9327.3    | LYPD1    | LYPD1       | 226  | 0.036                    | 0.019 | 0.061   | 0.04 | -0.16    | 0.03 | 0.396 | 0.666  | 0.011           | 0.039 | 0.777    | 0.01          | -0.07         | 0.09        | -0.003 | 0.184   | -0.038   | 0.330 | 0.007 | 0.677     | 0.02  | -0.08 | 0.09  | 0.039  | 0.40  | 0.38     | 0.04  | 0.11  |      |
| 9327.3    | LYPD1    | LYPD1       | 226  | 0.036                    | 0.019 | 0.061   | 0.04 | -0.16    | 0.03 | 0.396 | 0.666  | 0.011           | 0.039 | 0.777    | 0.01          | -0.07         | 0.09        | -0.003 | 0.184   | -0.038   | 0.330 | 0.007 | 0.677     | 0.02  | -0.08 | 0.09  | 0.039  | 0.40  | 0.38     | 0.04  | 0.11  |      |
| 9327.3    | LYPD1    | LYPD1</     |      |                          |       |         |      |          |      |       |        |                 |       |          |               |               |             |        |         |          |       |       |           |       |       |       |        |       |          |       |       |      |

Table S5. Association of type 2 diabetes with Ferland plasma protein.

| SomaLogic Gene | Protein  | rsnp       | Inverse variance weighted |        | MR Egger |       | Weighted median |       | Weighted mode |       |       |       |        |       |       |       |      |      |
|----------------|----------|------------|---------------------------|--------|----------|-------|-----------------|-------|---------------|-------|-------|-------|--------|-------|-------|-------|------|------|
|                |          |            | b1w                       | se1w   | pval1w   | OR1w  | b2w             | se2w  | pval2w        | OR2w  | b3w   | se3w  | pval3w | OR3w  |       |       |      |      |
| 3388_58        | PAK7     | PAK7       | 0.26                      | 0.033  | 0.019    | 0.079 | 0.033           | 0.32  | -0.07         | 0.079 | 0.429 | 0.189 | 0.019  | 0.039 | 0.021 | 0.022 | 0.06 | 0.10 |
| 6246_12        | CDMP2    | CDMP2      | 0.26                      | 0.033  | 0.019    | 0.079 | 0.033           | 0.32  | -0.07         | 0.079 | 0.429 | 0.189 | 0.019  | 0.039 | 0.021 | 0.022 | 0.06 | 0.10 |
| 5730_50        | FXN1     | FXN1       | 0.26                      | 0.032  | 0.018    | 0.079 | 0.033           | 0.32  | -0.07         | 0.079 | 0.429 | 0.189 | 0.019  | 0.039 | 0.021 | 0.022 | 0.06 | 0.10 |
| 6470_19        | BCBL1    | Bcl11      | 0.26                      | 0.038  | 0.021    | 0.080 | -0.04           | -0.08 | -0.43         | 0.029 | 0.401 | 0.008 | 0.043  | 0.087 | -0.01 | -0.08 | 0.08 | 0.08 |
| 6658_58        | SCXCL10  | SCXCL10    | 0.26                      | 0.038  | 0.021    | 0.080 | -0.04           | -0.08 | -0.43         | 0.029 | 0.401 | 0.008 | 0.043  | 0.087 | -0.01 | -0.08 | 0.08 | 0.08 |
| 6606_61        | KISS1    | KISS1      | 0.26                      | -0.040 | 0.023    | 0.079 | -0.04           | -0.08 | -0.43         | 0.029 | 0.401 | 0.008 | 0.043  | 0.087 | -0.01 | -0.08 | 0.08 | 0.08 |
| 6918_18        | KCK1     | CCKN       | 0.26                      | -0.033 | 0.019    | 0.081 | -0.03           | -0.07 | -0.43         | 0.029 | 0.401 | 0.008 | 0.043  | 0.087 | -0.01 | -0.08 | 0.08 | 0.08 |
| 7621_1         | C1D      | C1D        | 0.26                      | 0.033  | 0.019    | 0.079 | 0.033           | 0.32  | -0.07         | 0.079 | 0.429 | 0.189 | 0.019  | 0.039 | 0.021 | 0.022 | 0.06 | 0.10 |
| 8308_24        | MXRA7    | MXRA7      | 0.26                      | -0.037 | 0.021    | 0.077 | -0.04           | -0.08 | -0.43         | 0.029 | 0.401 | 0.008 | 0.043  | 0.087 | -0.01 | -0.08 | 0.08 | 0.08 |
| 8388_24        | SPAST    | SPAST      | 0.26                      | 0.034  | 0.019    | 0.079 | 0.033           | 0.32  | -0.07         | 0.079 | 0.429 | 0.189 | 0.019  | 0.039 | 0.021 | 0.022 | 0.06 | 0.10 |
| 8398_42        | FA2H     | FA2H       | 0.26                      | 0.033  | 0.019    | 0.079 | 0.033           | 0.32  | -0.07         | 0.079 | 0.429 | 0.189 | 0.019  | 0.039 | 0.021 | 0.022 | 0.06 | 0.10 |
| 8843_34        | MYRF     | MYRF       | 0.26                      | 0.034  | 0.020    | 0.078 | 0.033           | 0.32  | -0.07         | 0.079 | 0.429 | 0.189 | 0.019  | 0.039 | 0.021 | 0.022 | 0.06 | 0.10 |
| 8867_21        | MURF     | MURF       | 0.26                      | 0.032  | 0.018    | 0.078 | 0.033           | 0.32  | -0.07         | 0.079 | 0.429 | 0.189 | 0.019  | 0.039 | 0.021 | 0.022 | 0.06 | 0.10 |
| 8745_20        | EFHE2    | EFHE2      | 0.26                      | 0.033  | 0.019    | 0.079 | 0.033           | 0.32  | -0.07         | 0.079 | 0.429 | 0.189 | 0.019  | 0.039 | 0.021 | 0.022 | 0.06 | 0.10 |
| 10047_12       | NCF2     | NCF2       | 0.26                      | 0.037  | 0.021    | 0.081 | -0.04           | -0.08 | -0.43         | 0.029 | 0.401 | 0.008 | 0.043  | 0.087 | -0.01 | -0.08 | 0.08 | 0.08 |
| 10447_18       | PMP30    | LCTP3      | 0.26                      | 0.033  | 0.019    | 0.079 | 0.033           | 0.32  | -0.07         | 0.079 | 0.429 | 0.189 | 0.019  | 0.039 | 0.021 | 0.022 | 0.06 | 0.10 |
| 10880_135      | LCTL     | LCTL       | 0.26                      | 0.034  | 0.020    | 0.082 | 0.033           | 0.32  | -0.07         | 0.079 | 0.429 | 0.189 | 0.019  | 0.039 | 0.021 | 0.022 | 0.06 | 0.10 |
| 12685_108      | RUVBL1   | RUVBL1     | 0.26                      | 0.033  | 0.019    | 0.079 | 0.033           | 0.32  | -0.07         | 0.079 | 0.429 | 0.189 | 0.019  | 0.039 | 0.021 | 0.022 | 0.06 | 0.10 |
| 13360_2        | UAF1     | Sperm-ase  | 0.26                      | 0.036  | 0.021    | 0.080 | -0.04           | -0.08 | -0.43         | 0.029 | 0.401 | 0.008 | 0.043  | 0.087 | -0.01 | -0.08 | 0.08 | 0.08 |
| 2201_17        | COL1A1   | Endostatin | 0.26                      | -0.034 | 0.019    | 0.081 | -0.03           | -0.07 | -0.43         | 0.029 | 0.401 | 0.008 | 0.043  | 0.087 | -0.01 | -0.08 | 0.08 | 0.08 |
| 3874_6         | UBR3L    | UBR3L      | 0.26                      | 0.032  | 0.018    | 0.082 | 0.033           | 0.32  | -0.07         | 0.079 | 0.429 | 0.189 | 0.019  | 0.039 | 0.021 | 0.022 | 0.06 | 0.10 |
| 7125_18        | CCDC9B   | CCDC9B     | 0.26                      | 0.033  | 0.019    | 0.079 | 0.033           | 0.32  | -0.07         | 0.079 | 0.429 | 0.189 | 0.019  | 0.039 | 0.021 | 0.022 | 0.06 | 0.10 |
| 17152_10       | KIR2D5A  | KIR2D5A    | 0.26                      | 0.036  | 0.021    | 0.082 | -0.04           | -0.08 | -0.43         | 0.029 | 0.401 | 0.008 | 0.043  | 0.087 | -0.01 | -0.08 | 0.08 | 0.08 |
| 10003_15       | ZNFX1    | ZNFX1      | 0.26                      | -0.034 | 0.020    | 0.083 | -0.03           | -0.07 | -0.43         | 0.029 | 0.401 | 0.008 | 0.043  | 0.087 | -0.01 | -0.08 | 0.08 | 0.08 |
| 10070_22       | PLCG2    | PLCG2      | 0.26                      | 0.032  | 0.018    | 0.083 | 0.033           | 0.32  | -0.07         | 0.079 | 0.429 | 0.189 | 0.019  | 0.039 | 0.021 | 0.022 | 0.06 | 0.10 |
| 11549_6        | ISL1     | ISL1       | 0.26                      | -0.033 | 0.019    | 0.082 | -0.03           | -0.07 | -0.43         | 0.029 | 0.401 | 0.008 | 0.043  | 0.087 | -0.01 | -0.08 | 0.08 | 0.08 |
| 12638_113      | SMYD2    | SMYD2      | 0.26                      | -0.033 | 0.019    | 0.082 | -0.03           | -0.07 | -0.43         | 0.029 | 0.401 | 0.008 | 0.043  | 0.087 | -0.01 | -0.08 | 0.08 | 0.08 |
| 12711_35       | SUL1B1   | SUL1B1     | 0.26                      | -0.033 | 0.019    | 0.082 | -0.03           | -0.07 | -0.43         | 0.029 | 0.401 | 0.008 | 0.043  | 0.087 | -0.01 | -0.08 | 0.08 | 0.08 |
| 12681_63       | USP21    | USP21      | 0.26                      | 0.033  | 0.019    | 0.082 | 0.033           | 0.32  | -0.07         | 0.079 | 0.429 | 0.189 | 0.019  | 0.039 | 0.021 | 0.022 | 0.06 | 0.10 |
| 11713_179      | FSTL1    | FSTL1      | 0.26                      | -0.041 | 0.023    | 0.083 | -0.04           | -0.08 | -0.43         | 0.029 | 0.401 | 0.008 | 0.043  | 0.087 | -0.01 | -0.08 | 0.08 | 0.08 |
| 16240_6        | OMP      | OMP        | 0.26                      | 0.033  | 0.019    | 0.082 | 0.033           | 0.32  | -0.07         | 0.079 | 0.429 | 0.189 | 0.019  | 0.039 | 0.021 | 0.022 | 0.06 | 0.10 |
| 18893_26       | GPR56    | GPR56      | 0.26                      | 0.033  | 0.019    | 0.083 | 0.033           | 0.32  | -0.07         | 0.079 | 0.429 | 0.189 | 0.019  | 0.039 | 0.021 | 0.022 | 0.06 | 0.10 |
| 5028_58        | RFS3     | RFS3       | 0.26                      | 0.037  | 0.021    | 0.082 | 0.033           | 0.32  | -0.07         | 0.079 | 0.429 | 0.189 | 0.019  | 0.039 | 0.021 | 0.022 | 0.06 | 0.10 |
| 5028_58        | CCL11    | CCR1       | 0.26                      | 0.037  | 0.021    | 0.082 | 0.033           | 0.32  | -0.07         | 0.079 | 0.429 | 0.189 | 0.019  | 0.039 | 0.021 | 0.022 | 0.06 | 0.10 |
| 8795_48        | TRPC     | TRPC       | 0.26                      | 0.031  | 0.018    | 0.081 | -0.03           | -0.07 | -0.43         | 0.029 | 0.401 | 0.008 | 0.043  | 0.087 | -0.01 | -0.08 | 0.08 | 0.08 |
| 10569_28       | FMRF2    | FMRF2      | 0.26                      | 0.032  | 0.019    | 0.081 | -0.03           | -0.07 | -0.43         | 0.029 | 0.401 | 0.008 | 0.043  | 0.087 | -0.01 | -0.08 | 0.08 | 0.08 |
| 13076_4        | FXR1     | FXR1       | 0.26                      | 0.032  | 0.019    | 0.083 | 0.033           | 0.32  | -0.07         | 0.079 | 0.429 | 0.189 | 0.019  | 0.039 | 0.021 | 0.022 | 0.06 | 0.10 |
| 13116_8        | TMEM132D | TMEM132D   | 0.26                      | 0.034  | 0.020    | 0.083 | -0.03           | -0.07 | -0.43         | 0.029 | 0.401 | 0.008 | 0.043  | 0.087 | -0.01 | -0.08 | 0.08 | 0.08 |
| 3152_3         | CNDP2    | CNDP2      | 0.26                      | 0.033  | 0.019    | 0.081 | -0.03           | -0.07 | -0.43         | 0.029 | 0.401 | 0.008 | 0.043  | 0.087 | -0.01 | -0.08 | 0.08 | 0.08 |
| 7988_18        | IL2RA    | IL2RA      | 0.26                      | -0.034 | 0.020    | 0.083 | -0.03           | -0.07 | -0.43         | 0.029 | 0.401 | 0.008 | 0.043  | 0.087 | -0.01 | -0.08 | 0.08 | 0.08 |
| 8085_18        | NALG2    | NALG2      | 0.26                      | -0.035 | 0.020    | 0.083 | -0.03           | -0.07 | -0.43         | 0.029 | 0.401 | 0.008 | 0.043  | 0.087 | -0.01 | -0.08 | 0.08 | 0.08 |
| 8085_18        | TMEM128B | TMEM128B   | 0.26                      | -0.035 | 0.020    | 0.083 | -0.03           | -0.07 | -0.43         | 0.029 | 0.401 | 0.008 | 0.043  | 0.087 | -0.01 | -0.08 | 0.08 | 0.08 |
| 17460_51       | Mx1      | Mx1        | 0.26                      | 0.036  | 0.021    | 0.084 | -0.04           | -0.08 | -0.43         | 0.029 | 0.401 | 0.008 | 0.043  | 0.087 | -0.01 | -0.08 | 0.08 | 0.08 |
| 3714_49        | KMK      | KMK        | 0.26                      | 0.032  | 0.018    | 0.084 | 0.033           | 0.32  | -0.07         | 0.079 | 0.429 | 0.189 | 0.019  | 0.039 | 0.021 | 0.022 | 0.06 | 0.10 |
| 3867_49        | SEZSL2   | SEZSL2     | 0.26                      | 0.033  | 0.019    | 0.084 | 0.033           | 0.32  | -0.07         | 0.079 | 0.429 | 0.189 | 0.019  | 0.039 | 0.021 | 0.022 | 0.06 | 0.10 |
| 7121_2         | SYT7     | SYT7       | 0.26                      | -0.034 | 0.020    | 0.084 | -0.03           | -0.07 | -0.43         | 0.029 | 0.401 | 0.008 | 0.043  | 0.087 | -0.01 | -0.08 | 0.08 | 0.08 |
| 9125_23        | MASP3    | MASP3      | 0.26                      | 0.033  | 0.019    | 0.084 | 0.033           | 0.32  | -0.07         | 0.079 | 0.429 | 0.189 | 0.019  | 0.039 | 0.021 | 0.022 | 0.06 | 0.10 |
| 15441_6        | GK2A     | GK2A       | 0.26                      | -0.041 | 0.024    | 0.084 | -0.03           | -0.07 | -0.43         | 0.029 | 0.401 | 0.008 | 0.043  | 0.087 | -0.01 | -0.08 | 0.08 | 0.08 |
| 6732_7         | YBX2     | YBX2       | 0.26                      | 0.036  | 0.021    | 0.084 | 0.033           | 0.32  | -0.07         | 0.079 | 0.429 | 0.189 | 0.019  | 0.039 | 0.021 | 0.022 | 0.06 | 0.10 |
| 6459_6         | PSG9     | PSG9       | 0.26                      | -0.034 | 0.020    | 0.084 | -0.03           | -0.07 | -0.43         | 0.029 | 0.401 | 0.008 | 0.043  | 0.087 | -0.01 | -0.08 | 0.08 | 0.08 |
| 8712_15        | NLGN2    | NLGN2      | 0.26                      | 0.033  | 0.019    | 0.084 | 0.033           | 0.32  | -0.07         | 0.079 | 0.429 | 0.189 | 0.019  | 0.039 | 0.021 | 0.022 | 0.06 | 0.10 |
| 12503_5        | SPFN1    | SPFN1      | 0.26                      | 0.033  | 0.019    | 0.085 | 0.033           | 0.32  | -0.07         | 0.079 | 0.429 | 0.189 | 0.019  | 0.039 | 0.021 | 0.022 | 0.06 | 0.10 |
| 2522_53        | FRFR1    | FRFR1      | 0.26                      | -0.032 | 0.020    | 0.085 | -0.03           | -0.07 | -0.43         | 0.029 | 0.401 | 0.008 | 0.043  | 0.087 | -0.01 | -0.08 | 0.08 | 0.08 |
| 12620_3        | SEPTIN1  | SEPTIN1    | 0.26                      | 0.032  | 0.019    | 0.085 | 0.033           | 0.32  | -0.07         | 0.079 | 0.429 | 0.189 | 0.019  | 0.039 | 0.021 | 0.022 | 0.06 | 0.10 |
| 12683_156      | DYPL5    | DYPL5      | 0.26                      | 0.034  | 0.020    | 0.085 | 0.033           | 0.32  | -0.07         | 0.079 | 0.429 | 0.189 | 0.019  | 0.039 | 0.021 | 0.022 | 0.06 | 0.10 |
| 12904_180      | CN2P2    | CN2P2      | 0.26                      | 0.033  | 0.019    | 0.085 | 0.033           | 0.32  | -0.07         | 0.079 | 0.429 | 0.189 | 0.019  | 0.039 | 0.021 | 0.022 | 0.06 | 0.10 |
| 11909_32       | TCEAL8   | TCEAL8     | 0.26                      | 0.033  | 0.019    | 0.085 | 0.033           | 0.32  | -0.07         | 0.079 | 0.429 | 0.189 | 0.019  | 0.039 | 0.021 | 0.022 | 0.06 | 0.10 |
| 4712_18        | AP0D     | AP0D       | 0.26                      | 0.032  | 0.019    | 0.085 | 0.033           | 0.32  | -0.07         | 0.079 | 0.429 | 0.189 | 0.019  | 0.039 | 0.021 | 0.022 | 0.06 | 0.10 |
| 6425_24        | MRP1     |            |                           |        |          |       |                 |       |               |       |       |       |        |       |       |       |      |      |

Table S5. Association of type 2 diabetes with Ferndal plasma protein.

| SomaLogicGene | Protein  | rnsnp      | Inverse variance weighted |       |        |       | MR Egger |       |       |        | Weighted median |             |       |             | Weighted mode |            |        |         |           |         |       |       |        |       |       |       |       |       |        |       |       |
|---------------|----------|------------|---------------------------|-------|--------|-------|----------|-------|-------|--------|-----------------|-------------|-------|-------------|---------------|------------|--------|---------|-----------|---------|-------|-------|--------|-------|-------|-------|-------|-------|--------|-------|-------|
|               |          |            | b1w                       | se1w  | pval1w | CI1w  | FOR_ZW   | Q     | pval  | begger | se_begger       | pval_begger | egger | inter_egger | se_egger      | pval_egger | b_mode | se_mode | pval_mode | CI_mode |       |       |        |       |       |       |       |       |        |       |       |
| 12717.65      | TOX3     | TOX3       | 0.26                      | 0.030 | 0.018  | 0.103 | 0.033    | 0.011 | 0.077 | 0.456  | 0.354           | 0.044       | 0.037 | 0.707       | 0.011         | 0.066      | 0.099  | 0.001   | 0.629     | 0.020   | 0.030 | 0.517 | -0.022 | 0.028 | 0.064 | 0.044 | 0.043 | 0.207 | -0.055 | 0.144 | 0.003 |
| 13430.59      | SLC14A11 | SLC14A11   | 0.26                      | 0.032 | 0.019  | 0.102 | 0.033    | 0.011 | 0.077 | 0.456  | 0.354           | 0.044       | 0.037 | 0.707       | 0.011         | 0.066      | 0.099  | 0.001   | 0.629     | 0.020   | 0.030 | 0.517 | -0.022 | 0.028 | 0.064 | 0.044 | 0.043 | 0.207 | -0.055 | 0.144 | 0.003 |
| 13499.30      | COG1     | COG1       | 0.26                      | 0.032 | 0.019  | 0.102 | 0.033    | 0.011 | 0.077 | 0.456  | 0.354           | 0.044       | 0.037 | 0.707       | 0.011         | 0.066      | 0.099  | 0.001   | 0.629     | 0.020   | 0.030 | 0.517 | -0.022 | 0.028 | 0.064 | 0.044 | 0.043 | 0.207 | -0.055 | 0.144 | 0.003 |
| 14112.40      | REL1     | REL1       | 0.26                      | 0.032 | 0.019  | 0.102 | 0.033    | 0.011 | 0.077 | 0.456  | 0.354           | 0.044       | 0.037 | 0.707       | 0.011         | 0.066      | 0.099  | 0.001   | 0.629     | 0.020   | 0.030 | 0.517 | -0.022 | 0.028 | 0.064 | 0.044 | 0.043 | 0.207 | -0.055 | 0.144 | 0.003 |
| 15437.11      | RAMPS1   | RAMPS1     | 0.26                      | 0.032 | 0.019  | 0.102 | 0.033    | 0.011 | 0.077 | 0.456  | 0.354           | 0.044       | 0.037 | 0.707       | 0.011         | 0.066      | 0.099  | 0.001   | 0.629     | 0.020   | 0.030 | 0.517 | -0.022 | 0.028 | 0.064 | 0.044 | 0.043 | 0.207 | -0.055 | 0.144 | 0.003 |
| 16785.45      | DEF5A3   | DEF5A3     | 0.26                      | 0.032 | 0.019  | 0.102 | 0.033    | 0.011 | 0.077 | 0.456  | 0.354           | 0.044       | 0.037 | 0.707       | 0.011         | 0.066      | 0.099  | 0.001   | 0.629     | 0.020   | 0.030 | 0.517 | -0.022 | 0.028 | 0.064 | 0.044 | 0.043 | 0.207 | -0.055 | 0.144 | 0.003 |
| 17183.11      | ANAK5    | ANAK5      | 0.26                      | 0.032 | 0.019  | 0.102 | 0.033    | 0.011 | 0.077 | 0.456  | 0.354           | 0.044       | 0.037 | 0.707       | 0.011         | 0.066      | 0.099  | 0.001   | 0.629     | 0.020   | 0.030 | 0.517 | -0.022 | 0.028 | 0.064 | 0.044 | 0.043 | 0.207 | -0.055 | 0.144 | 0.003 |
| 17365.7       | CCBL1    | KAT5       | 0.26                      | 0.032 | 0.019  | 0.102 | 0.033    | 0.011 | 0.077 | 0.456  | 0.354           | 0.044       | 0.037 | 0.707       | 0.011         | 0.066      | 0.099  | 0.001   | 0.629     | 0.020   | 0.030 | 0.517 | -0.022 | 0.028 | 0.064 | 0.044 | 0.043 | 0.207 | -0.055 | 0.144 | 0.003 |
| 19195.85      | RPS5     | R5S        | 0.26                      | 0.032 | 0.019  | 0.102 | 0.033    | 0.011 | 0.077 | 0.456  | 0.354           | 0.044       | 0.037 | 0.707       | 0.011         | 0.066      | 0.099  | 0.001   | 0.629     | 0.020   | 0.030 | 0.517 | -0.022 | 0.028 | 0.064 | 0.044 | 0.043 | 0.207 | -0.055 | 0.144 | 0.003 |
| 2590.69       | ROR1     | ROR1       | 0.26                      | 0.032 | 0.019  | 0.102 | 0.033    | 0.011 | 0.077 | 0.456  | 0.354           | 0.044       | 0.037 | 0.707       | 0.011         | 0.066      | 0.099  | 0.001   | 0.629     | 0.020   | 0.030 | 0.517 | -0.022 | 0.028 | 0.064 | 0.044 | 0.043 | 0.207 | -0.055 | 0.144 | 0.003 |
| 3798.19       | ANKK1L4  | ANKK1L4    | 0.26                      | 0.032 | 0.019  | 0.102 | 0.033    | 0.011 | 0.077 | 0.456  | 0.354           | 0.044       | 0.037 | 0.707       | 0.011         | 0.066      | 0.099  | 0.001   | 0.629     | 0.020   | 0.030 | 0.517 | -0.022 | 0.028 | 0.064 | 0.044 | 0.043 | 0.207 | -0.055 | 0.144 | 0.003 |
| 4971.1        | CTSB     | CTSB       | 0.26                      | 0.032 | 0.019  | 0.102 | 0.033    | 0.011 | 0.077 | 0.456  | 0.354           | 0.044       | 0.037 | 0.707       | 0.011         | 0.066      | 0.099  | 0.001   | 0.629     | 0.020   | 0.030 | 0.517 | -0.022 | 0.028 | 0.064 | 0.044 | 0.043 | 0.207 | -0.055 | 0.144 | 0.003 |
| 6896.2        | CD1262   | CD1262     | 0.26                      | 0.032 | 0.019  | 0.102 | 0.033    | 0.011 | 0.077 | 0.456  | 0.354           | 0.044       | 0.037 | 0.707       | 0.011         | 0.066      | 0.099  | 0.001   | 0.629     | 0.020   | 0.030 | 0.517 | -0.022 | 0.028 | 0.064 | 0.044 | 0.043 | 0.207 | -0.055 | 0.144 | 0.003 |
| 8273.15       | CD3E     | CD3E       | 0.26                      | 0.032 | 0.019  | 0.102 | 0.033    | 0.011 | 0.077 | 0.456  | 0.354           | 0.044       | 0.037 | 0.707       | 0.011         | 0.066      | 0.099  | 0.001   | 0.629     | 0.020   | 0.030 | 0.517 | -0.022 | 0.028 | 0.064 | 0.044 | 0.043 | 0.207 | -0.055 | 0.144 | 0.003 |
| 8525.17       | DUSP13   | DUSP13     | 0.26                      | 0.032 | 0.019  | 0.102 | 0.033    | 0.011 | 0.077 | 0.456  | 0.354           | 0.044       | 0.037 | 0.707       | 0.011         | 0.066      | 0.099  | 0.001   | 0.629     | 0.020   | 0.030 | 0.517 | -0.022 | 0.028 | 0.064 | 0.044 | 0.043 | 0.207 | -0.055 | 0.144 | 0.003 |
| 17773.26      | NAP3     | NAP3       | 0.26                      | 0.032 | 0.019  | 0.102 | 0.033    | 0.011 | 0.077 | 0.456  | 0.354           | 0.044       | 0.037 | 0.707       | 0.011         | 0.066      | 0.099  | 0.001   | 0.629     | 0.020   | 0.030 | 0.517 | -0.022 | 0.028 | 0.064 | 0.044 | 0.043 | 0.207 | -0.055 | 0.144 | 0.003 |
| 4124.24       | NAPPA    | NAPPA      | 0.26                      | 0.032 | 0.019  | 0.102 | 0.033    | 0.011 | 0.077 | 0.456  | 0.354           | 0.044       | 0.037 | 0.707       | 0.011         | 0.066      | 0.099  | 0.001   | 0.629     | 0.020   | 0.030 | 0.517 | -0.022 | 0.028 | 0.064 | 0.044 | 0.043 | 0.207 | -0.055 | 0.144 | 0.003 |
| 9962.1        | CDHR5    | MUC2L      | 0.26                      | 0.032 | 0.019  | 0.102 | 0.033    | 0.011 | 0.077 | 0.456  | 0.354           | 0.044       | 0.037 | 0.707       | 0.011         | 0.066      | 0.099  | 0.001   | 0.629     | 0.020   | 0.030 | 0.517 | -0.022 | 0.028 | 0.064 | 0.044 | 0.043 | 0.207 | -0.055 | 0.144 | 0.003 |
| 8620.35       | ADAM30   | ADAM30     | 0.26                      | 0.032 | 0.019  | 0.102 | 0.033    | 0.011 | 0.077 | 0.456  | 0.354           | 0.044       | 0.037 | 0.707       | 0.011         | 0.066      | 0.099  | 0.001   | 0.629     | 0.020   | 0.030 | 0.517 | -0.022 | 0.028 | 0.064 | 0.044 | 0.043 | 0.207 | -0.055 | 0.144 | 0.003 |
| 3600.2        | CHIT1    | Chitinase3 | 0.26                      | 0.032 | 0.019  | 0.102 | 0.033    | 0.011 | 0.077 | 0.456  | 0.354           | 0.044       | 0.037 | 0.707       | 0.011         | 0.066      | 0.099  | 0.001   | 0.629     | 0.020   | 0.030 | 0.517 | -0.022 | 0.028 | 0.064 | 0.044 | 0.043 | 0.207 | -0.055 | 0.144 | 0.003 |
| 4829.43       | RFN3     | STRATIFIN  | 0.26                      | 0.032 | 0.019  | 0.102 | 0.033    | 0.011 | 0.077 | 0.456  | 0.354           | 0.044       | 0.037 | 0.707       | 0.011         | 0.066      | 0.099  | 0.001   | 0.629     | 0.020   | 0.030 | 0.517 | -0.022 | 0.028 | 0.064 | 0.044 | 0.043 | 0.207 | -0.055 | 0.144 | 0.003 |
| 16590.38      | OPN1     | OPN1       | 0.26                      | 0.032 | 0.019  | 0.102 | 0.033    | 0.011 | 0.077 | 0.456  | 0.354           | 0.044       | 0.037 | 0.707       | 0.011         | 0.066      | 0.099  | 0.001   | 0.629     | 0.020   | 0.030 | 0.517 | -0.022 | 0.028 | 0.064 | 0.044 | 0.043 | 0.207 | -0.055 | 0.144 | 0.003 |
| 15430.21      | RND3     | RND3       | 0.26                      | 0.032 | 0.019  | 0.102 | 0.033    | 0.011 | 0.077 | 0.456  | 0.354           | 0.044       | 0.037 | 0.707       | 0.011         | 0.066      | 0.099  | 0.001   | 0.629     | 0.020   | 0.030 | 0.517 | -0.022 | 0.028 | 0.064 | 0.044 | 0.043 | 0.207 | -0.055 | 0.144 | 0.003 |
| 9644.24       | C7orf99  | C7orf99    | 0.26                      | 0.032 | 0.019  | 0.102 | 0.033    | 0.011 | 0.077 | 0.456  | 0.354           | 0.044       | 0.037 | 0.707       | 0.011         | 0.066      | 0.099  | 0.001   | 0.629     | 0.020   | 0.030 | 0.517 | -0.022 | 0.028 | 0.064 | 0.044 | 0.043 | 0.207 | -0.055 | 0.144 | 0.003 |
| 8545.156      | C22orf6  | C22orf6    | 0.26                      | 0.032 | 0.019  | 0.102 | 0.033    | 0.011 | 0.077 | 0.456  | 0.354           | 0.044       | 0.037 | 0.707       | 0.011         | 0.066      | 0.099  | 0.001   | 0.629     | 0.020   | 0.030 | 0.517 | -0.022 | 0.028 | 0.064 | 0.044 | 0.043 | 0.207 | -0.055 | 0.144 | 0.003 |
| 19229.92      | HOMER1   | HOMER1     | 0.26                      | 0.032 | 0.019  | 0.102 | 0.033    | 0.011 | 0.077 | 0.456  | 0.354           | 0.044       | 0.037 | 0.707       | 0.011         | 0.066      | 0.099  | 0.001   | 0.629     | 0.020   | 0.030 | 0.517 | -0.022 | 0.028 | 0.064 | 0.044 | 0.043 | 0.207 | -0.055 | 0.144 | 0.003 |
| 8024.64       | TPST2    | TPST2      | 0.26                      | 0.032 | 0.019  | 0.102 | 0.033    | 0.011 | 0.077 | 0.456  | 0.354           | 0.044       | 0.037 | 0.707       | 0.011         | 0.066      | 0.099  | 0.001   | 0.629     | 0.020   | 0.030 | 0.517 | -0.022 | 0.028 | 0.064 | 0.044 | 0.043 | 0.207 | -0.055 | 0.144 | 0.003 |
| 16892.7       | CLSTN2   | CLSTN2     | 0.26                      | 0.032 | 0.019  | 0.102 | 0.033    | 0.011 | 0.077 | 0.456  | 0.354           | 0.044       | 0.037 | 0.707       | 0.011         | 0.066      | 0.099  | 0.001   | 0.629     | 0.020   | 0.030 | 0.517 | -0.022 | 0.028 | 0.064 | 0.044 | 0.043 | 0.207 | -0.055 | 0.144 | 0.003 |
| 6369.82       | DEAF1    | DEAF1      | 0.26                      | 0.032 | 0.019  | 0.102 | 0.033    | 0.011 | 0.077 | 0.456  | 0.354           | 0.044       | 0.037 | 0.707       | 0.011         | 0.066      | 0.099  | 0.001   | 0.629     | 0.020   | 0.030 | 0.517 | -0.022 | 0.028 | 0.064 | 0.044 | 0.043 | 0.207 | -0.055 | 0.144 | 0.003 |
| 8121.3        | SEMA6B   | SEMA6B     | 0.26                      | 0.032 | 0.019  | 0.102 | 0.033    | 0.011 | 0.077 | 0.456  | 0.354           | 0.044       | 0.037 | 0.707       | 0.011         | 0.066      | 0.099  | 0.001   | 0.629     | 0.020   | 0.030 | 0.517 | -0.022 | 0.028 | 0.064 | 0.044 | 0.043 | 0.207 | -0.055 | 0.144 | 0.003 |
| 12018.14      | TPK1     | TPK1       | 0.26                      | 0.032 | 0.019  | 0.102 | 0.033    | 0.011 | 0.077 | 0.456  | 0.354           | 0.044       | 0.037 | 0.707       | 0.011         | 0.066      | 0.099  | 0.001   | 0.629     | 0.020   | 0.030 | 0.517 | -0.022 | 0.028 | 0.064 | 0.044 | 0.043 | 0.207 | -0.055 | 0.144 | 0.003 |
| 13436.54      | MAZ      | MAZ        | 0.26                      | 0.032 | 0.019  | 0.102 | 0.033    | 0.011 | 0.077 | 0.456  | 0.354           | 0.044       | 0.037 | 0.707       | 0.011         | 0.066      | 0.099  | 0.001   | 0.629     | 0.020   | 0.030 | 0.517 | -0.022 | 0.028 | 0.064 | 0.044 | 0.043 | 0.207 | -0.055 | 0.144 | 0.003 |
| 15391.114     | GAS6     | GAS6       | 0.26                      | 0.032 | 0.019  | 0.102 | 0.033    | 0.011 | 0.077 | 0.456  | 0.354           | 0.044       | 0.037 | 0.707       | 0.011         | 0.066      | 0.099  | 0.001   | 0.629     | 0.020   | 0.030 | 0.517 | -0.022 | 0.028 | 0.064 | 0.044 | 0.043 | 0.207 | -0.055 | 0.144 | 0.003 |
| 17989.12      | WBP2     | WBP2       | 0.26                      | 0.032 | 0.019  | 0.102 | 0.033    | 0.011 | 0.077 | 0.456  | 0.354           | 0.044       | 0.037 | 0.707       | 0.011         | 0.066      | 0.099  | 0.001   | 0.629     | 0.020   | 0.030 | 0.517 | -0.022 | 0.028 | 0.064 | 0.044 | 0.043 | 0.207 | -0.055 | 0.144 | 0.003 |
| 18303.39      | NRGN     | NRGN       | 0.26                      | 0.032 | 0.019  | 0.102 | 0.033    | 0.011 | 0.077 | 0.456  | 0.354           | 0.044       | 0.037 | 0.707       | 0.011         | 0.066      | 0.099  | 0.001   | 0.629     | 0.020   | 0.030 | 0.517 | -0.022 | 0.028 | 0.064 | 0.044 | 0.043 | 0.207 | -0.055 | 0.144 | 0.003 |
| 18707.55      | ELP2     | ELP2       | 0.26                      | 0.032 | 0.019  | 0.102 | 0.033    | 0.011 | 0.077 | 0.456  | 0.354           | 0.044       | 0.037 | 0.707       | 0.011         | 0.066      | 0.099  | 0.001   | 0.629     | 0.020   | 0.030 | 0.517 | -0.022 | 0.028 | 0.064 | 0.044 | 0.043 | 0.207 | -0.055 | 0.144 | 0.003 |
| 7868.15       | CRTM     | CRTM       | 0.26                      | 0.032 | 0.019  | 0.102 | 0.033    | 0.011 | 0.077 | 0.456  | 0.354           | 0.044       | 0.037 | 0.707       | 0.011         | 0.066      | 0.099  | 0.001   | 0.629     | 0.020   | 0.030 | 0.517 | -0.022 | 0.028 | 0.064 | 0.044 | 0.043 | 0.207 | -0.055 | 0.144 | 0.003 |
| 10085.25      | STAR     | STAR       | 0.26                      | 0.032 | 0.019  | 0.102 | 0.033    | 0.011 | 0.077 | 0.456  | 0.              |             |       |             |               |            |        |         |           |         |       |       |        |       |       |       |       |       |        |       |       |

Table S5. Association of type 2 diabetes with Ferland plasma protein.

| Gene      | Protein | rsnp        | Inverse variance weighted |        | MR Egger |       | Weighted median |               | Weighted mode |           |            |          |       |              |               |            |        |         |            |          |               |               |        |       |       |               |               |
|-----------|---------|-------------|---------------------------|--------|----------|-------|-----------------|---------------|---------------|-----------|------------|----------|-------|--------------|---------------|------------|--------|---------|------------|----------|---------------|---------------|--------|-------|-------|---------------|---------------|
|           |         |             | b1w                       | se.b1w | pval.iw  | CI.iw | FOR_ZW          | Q_val         | begger        | se.begger | pval.egger | CI.egger | egger | se.egger     | pval.wmedian  | CI.wmedian | b.mode | se.mode | pval.wmode | CI.wmode |               |               |        |       |       |               |               |
| 1181.73   | TYMP    | TP          | 226                       | -0.027 | 0.18     | 0.130 | -0.03           | (-0.08, 0.01) | 0.499         | 0.233     | -0.068     | 0.037    | 0.177 | (0.14, 0.21) | 0.003         | 0.216      | 0.046  | 0.38    | 0.233      | -0.05    | (-0.12, 0.03) | -0.045        | 0.034  | 0.188 | -0.05 | (-0.11, 0.02) |               |
| 1543.5    | PNOC    | PNOC        | 226                       | -0.027 | 0.18     | 0.130 | -0.03           | (-0.08, 0.01) | 0.499         | 0.233     | -0.068     | 0.037    | 0.177 | (0.14, 0.21) | 0.003         | 0.216      | 0.046  | 0.38    | 0.233      | -0.05    | (-0.12, 0.03) | -0.045        | 0.034  | 0.188 | -0.05 | (-0.11, 0.02) |               |
| 11146.4   | TBX21   | TBX22       | 226                       | -0.029 | 0.19     | 0.131 | 0.03            | (-0.01, 0.07) | 0.501         | 0.234     | 0.028      | 0.041    | 0.492 | (0.43, 0.55) | 0.001         | 0.965      | 0.101  | 0.41    | 0.801      | 0.01     | (-0.07, 0.09) | 0.019         | 0.042  | 0.681 | 0.02  | (-0.06, 0.10) |               |
| 9547.29   | EMD1    | EMD1        | 226                       | -0.029 | 0.19     | 0.131 | 0.03            | (-0.01, 0.07) | 0.501         | 0.234     | 0.028      | 0.041    | 0.492 | (0.43, 0.55) | 0.001         | 0.965      | 0.101  | 0.41    | 0.801      | 0.01     | (-0.07, 0.09) | 0.019         | 0.042  | 0.681 | 0.02  | (-0.06, 0.10) |               |
| 10035.6   | DUSP4   | DUSP4       | 226                       | -0.029 | 0.19     | 0.131 | 0.03            | (-0.01, 0.07) | 0.501         | 0.234     | 0.028      | 0.041    | 0.492 | (0.43, 0.55) | 0.001         | 0.965      | 0.101  | 0.41    | 0.801      | 0.01     | (-0.07, 0.09) | 0.019         | 0.042  | 0.681 | 0.02  | (-0.06, 0.10) |               |
| 5699.26   | SIRPB   | SIRPB       | 226                       | -0.027 | 0.18     | 0.131 | 0.03            | (-0.01, 0.06) | 0.501         | 0.234     | 0.028      | 0.041    | 0.492 | (0.43, 0.55) | 0.001         | 0.965      | 0.101  | 0.41    | 0.801      | 0.01     | (-0.07, 0.09) | 0.019         | 0.042  | 0.681 | 0.02  | (-0.06, 0.10) |               |
| 14085.11  | CD8     | CD8         | 226                       | -0.031 | 0.021    | 0.131 | -0.03           | (-0.07, 0.01) | 0.502         | 0.230     | -0.029     | 0.042    | 0.487 | (0.43, 0.51) | 0.005         | 0.952      | 0.224  | 0.35    | 0.815      | -0.02    | (-0.08, 0.04) | -0.081        | 0.040  | 0.129 | -0.06 | (-0.14, 0.02) |               |
| 12800.7   | ARRBP2  | ARRBP2      | 226                       | -0.031 | 0.021    | 0.131 | -0.03           | (-0.07, 0.01) | 0.502         | 0.230     | -0.029     | 0.042    | 0.487 | (0.43, 0.51) | 0.005         | 0.952      | 0.224  | 0.35    | 0.815      | -0.02    | (-0.08, 0.04) | -0.081        | 0.040  | 0.129 | -0.06 | (-0.14, 0.02) |               |
| 1569.15   | COL2A1  | Collagen II | 226                       | -0.033 | 0.022    | 0.132 | -0.03           | (-0.08, 0.01) | 0.504         | 0.234     | 0.032      | 0.044    | 0.470 | (0.43, 0.51) | 0.004         | 0.991      | -0.078 | 0.35    | 0.027      | -0.08    | (-0.15, 0.01) | -0.069        | 0.040  | 0.882 | 0.07  | (-0.15, 0.01) |               |
| 2797.56   | AFOPB   | AFOPB       | 226                       | -0.048 | 0.032    | 0.132 | -0.03           | (-0.11, 0.01) | 0.504         | 0.234     | -0.042     | 0.044    | 0.518 | -0.04        | (-0.10, 0.08) | 0.000      | 0.910  | 0.118   | 0.38       | 0.634    | 0.02          | (-0.06, 0.09) | -0.024 | 0.040 | 0.551 | 0.02          | (-0.05, 0.10) |
| 5032.64   | SRRP1   | SRRP1       | 226                       | -0.029 | 0.19     | 0.131 | 0.03            | (-0.01, 0.07) | 0.504         | 0.234     | 0.028      | 0.041    | 0.492 | (0.43, 0.55) | 0.001         | 0.965      | 0.101  | 0.41    | 0.801      | 0.01     | (-0.07, 0.09) | 0.019         | 0.042  | 0.681 | 0.02  | (-0.06, 0.10) |               |
| 11126.102 | TRIO    | TRIO        | 226                       | -0.029 | 0.19     | 0.131 | 0.03            | (-0.01, 0.07) | 0.504         | 0.234     | 0.028      | 0.041    | 0.492 | (0.43, 0.55) | 0.001         | 0.965      | 0.101  | 0.41    | 0.801      | 0.01     | (-0.07, 0.09) | 0.019         | 0.042  | 0.681 | 0.02  | (-0.06, 0.10) |               |
| 12408.33  | RAB22A  | RAB22A      | 226                       | -0.027 | 0.18     | 0.133 | 0.03            | (-0.01, 0.06) | 0.504         | 0.234     | 0.027      | 0.041    | 0.492 | (0.43, 0.55) | 0.001         | 0.965      | 0.101  | 0.41    | 0.801      | 0.01     | (-0.07, 0.09) | 0.019         | 0.042  | 0.681 | 0.02  | (-0.06, 0.10) |               |
| 14121.24  | TRHRST9 | TRHRST9     | 226                       | -0.027 | 0.18     | 0.133 | 0.03            | (-0.01, 0.06) | 0.504         | 0.234     | 0.027      | 0.041    | 0.492 | (0.43, 0.55) | 0.001         | 0.965      | 0.101  | 0.41    | 0.801      | 0.01     | (-0.07, 0.09) | 0.019         | 0.042  | 0.681 | 0.02  | (-0.06, 0.10) |               |
| 3328.58   | CADMI   | Nectin-like | 226                       | -0.028 | 0.18     | 0.133 | 0.03            | (-0.01, 0.06) | 0.504         | 0.234     | 0.027      | 0.041    | 0.492 | (0.43, 0.55) | 0.001         | 0.965      | 0.101  | 0.41    | 0.801      | 0.01     | (-0.07, 0.09) | 0.019         | 0.042  | 0.681 | 0.02  | (-0.06, 0.10) |               |
| 1455.7    | TNSI    | Tensin      | 226                       | -0.029 | 0.19     | 0.133 | 0.03            | (-0.01, 0.07) | 0.504         | 0.234     | 0.027      | 0.041    | 0.492 | (0.43, 0.55) | 0.001         | 0.965      | 0.101  | 0.41    | 0.801      | 0.01     | (-0.07, 0.09) | 0.019         | 0.042  | 0.681 | 0.02  | (-0.06, 0.10) |               |
| 10075.75  | ACAD8   | ACAD8       | 226                       | -0.027 | 0.18     | 0.133 | 0.03            | (-0.01, 0.06) | 0.504         | 0.234     | 0.027      | 0.041    | 0.492 | (0.43, 0.55) | 0.001         | 0.965      | 0.101  | 0.41    | 0.801      | 0.01     | (-0.07, 0.09) | 0.019         | 0.042  | 0.681 | 0.02  | (-0.06, 0.10) |               |
| 12432.29  | CACYP8  | CACYP8      | 226                       | -0.027 | 0.18     | 0.133 | 0.03            | (-0.01, 0.06) | 0.504         | 0.234     | 0.027      | 0.041    | 0.492 | (0.43, 0.55) | 0.001         | 0.965      | 0.101  | 0.41    | 0.801      | 0.01     | (-0.07, 0.09) | 0.019         | 0.042  | 0.681 | 0.02  | (-0.06, 0.10) |               |
| 4899.2    | AGR2    | AGR2        | 226                       | -0.029 | 0.19     | 0.134 | 0.03            | (-0.01, 0.07) | 0.506         | 0.237     | 0.008      | 0.039    | 0.839 | 0.01         | (-0.07, 0.09) | 0.001      | 0.965  | 0.101   | 0.41       | 0.801    | 0.01          | (-0.07, 0.09) | 0.019  | 0.042 | 0.681 | 0.02          | (-0.06, 0.10) |
| 6255.74   | CPY1M1  | CPY1M1      | 226                       | -0.029 | 0.19     | 0.134 | 0.03            | (-0.01, 0.07) | 0.506         | 0.237     | 0.008      | 0.039    | 0.839 | 0.01         | (-0.07, 0.09) | 0.001      | 0.965  | 0.101   | 0.41       | 0.801    | 0.01          | (-0.07, 0.09) | 0.019  | 0.042 | 0.681 | 0.02          | (-0.06, 0.10) |
| 9579.263  | MANKS4  | MANKS4      | 226                       | -0.064 | 0.056    | 0.138 | -0.08           | (-0.18, 0.03) | 0.506         | 0.237     | -0.064     | 0.056    | 0.138 | -0.08        | (-0.18, 0.03) | 0.001      | 0.965  | 0.101   | 0.41       | 0.801    | 0.01          | (-0.07, 0.09) | 0.019  | 0.042 | 0.681 | 0.02          | (-0.06, 0.10) |
| 4911.49   | GSTP1   | Glutathione | 226                       | -0.028 | 0.19     | 0.134 | 0.03            | (-0.01, 0.07) | 0.506         | 0.237     | 0.008      | 0.039    | 0.839 | 0.01         | (-0.07, 0.09) | 0.001      | 0.965  | 0.101   | 0.41       | 0.801    | 0.01          | (-0.07, 0.09) | 0.019  | 0.042 | 0.681 | 0.02          | (-0.06, 0.10) |
| 9470.15   | METTL24 | METTL24     | 226                       | -0.028 | 0.19     | 0.134 | 0.03            | (-0.01, 0.07) | 0.506         | 0.237     | 0.008      | 0.039    | 0.839 | 0.01         | (-0.07, 0.09) | 0.001      | 0.965  | 0.101   | 0.41       | 0.801    | 0.01          | (-0.07, 0.09) | 0.019  | 0.042 | 0.681 | 0.02          | (-0.06, 0.10) |
| 10396.6   | MOI1    | MOI1        | 226                       | -0.029 | 0.19     | 0.134 | 0.03            | (-0.01, 0.07) | 0.507         | 0.237     | 0.009      | 0.040    | 0.840 | 0.01         | (-0.07, 0.09) | 0.001      | 0.965  | 0.101   | 0.41       | 0.801    | 0.01          | (-0.07, 0.09) | 0.019  | 0.042 | 0.681 | 0.02          | (-0.06, 0.10) |
| 18218.48  | CNR1P1  | CNR1P1      | 226                       | -0.029 | 0.19     | 0.135 | 0.03            | (-0.01, 0.07) | 0.507         | 0.237     | 0.009      | 0.040    | 0.840 | 0.01         | (-0.07, 0.09) | 0.001      | 0.965  | 0.101   | 0.41       | 0.801    | 0.01          | (-0.07, 0.09) | 0.019  | 0.042 | 0.681 | 0.02          | (-0.06, 0.10) |
| 3412.7    | BCL2L1  | Bcl-2       | 226                       | -0.027 | 0.18     | 0.135 | 0.03            | (-0.01, 0.06) | 0.508         | 0.238     | 0.008      | 0.039    | 0.839 | 0.01         | (-0.07, 0.09) | 0.001      | 0.965  | 0.101   | 0.41       | 0.801    | 0.01          | (-0.07, 0.09) | 0.019  | 0.042 | 0.681 | 0.02          | (-0.06, 0.10) |
| 12732.13  | MPPT    | MPPT        | 226                       | -0.029 | 0.19     | 0.135 | 0.03            | (-0.01, 0.07) | 0.508         | 0.238     | 0.009      | 0.040    | 0.840 | 0.01         | (-0.07, 0.09) | 0.001      | 0.965  | 0.101   | 0.41       | 0.801    | 0.01          | (-0.07, 0.09) | 0.019  | 0.042 | 0.681 | 0.02          | (-0.06, 0.10) |
| 5128.53   | SLAMF6  | SLAMF6      | 226                       | -0.028 | 0.19     | 0.135 | 0.03            | (-0.01, 0.07) | 0.508         | 0.238     | 0.009      | 0.040    | 0.840 | 0.01         | (-0.07, 0.09) | 0.001      | 0.965  | 0.101   | 0.41       | 0.801    | 0.01          | (-0.07, 0.09) | 0.019  | 0.042 | 0.681 | 0.02          | (-0.06, 0.10) |
| 18289.16  | CCL15   | MIP-5       | 226                       | -0.033 | 0.022    | 0.135 | -0.03           | (-0.08, 0.01) | 0.508         | 0.238     | -0.044     | 0.037    | 0.539 | -0.03        | (-0.11, 0.06) | 0.000      | 0.985  | -0.021  | 0.44       | 0.632    | -0.02         | (-0.11, 0.06) | -0.012 | 0.043 | 0.784 | -0.01         | (-0.10, 0.07) |
| 12248.46  | SARS2   | SARS2       | 226                       | -0.029 | 0.19     | 0.135 | 0.03            | (-0.01, 0.07) | 0.508         | 0.238     | 0.009      | 0.040    | 0.840 | 0.01         | (-0.07, 0.09) | 0.001      | 0.965  | 0.101   | 0.41       | 0.801    | 0.01          | (-0.07, 0.09) | 0.019  | 0.042 | 0.681 | 0.02          | (-0.06, 0.10) |
| 17775.8   | TAGLN3  | TAGLN3      | 226                       | -0.029 | 0.19     | 0.136 | 0.03            | (-0.01, 0.07) | 0.509         | 0.241     | 0.028      | 0.039    | 0.840 | (0.78, 0.91) | 0.000         | 0.985      | -0.021 | 0.44    | 0.632      | -0.02    | (-0.11, 0.06) | -0.012        | 0.043  | 0.784 | -0.01 | (-0.10, 0.07) |               |
| 12729.12  | PSH2G   | PSH2G       | 226                       | -0.028 | 0.19     | 0.136 | 0.03            | (-0.01, 0.06) | 0.509         | 0.241     | 0.028      | 0.039    | 0.840 | (0.78, 0.91) | 0.000         | 0.985      | -0.021 | 0.44    | 0.632      | -0.02    | (-0.11, 0.06) | -0.012        | 0.043  | 0.784 | -0.01 | (-0.10, 0.07) |               |
| 11421.10  | EHOD4   | EHOD4       | 226                       | -0.028 | 0.19     | 0.136 | 0.03            | (-0.01, 0.06) | 0.509         | 0.241     | 0.028      | 0.039    | 0.840 | (0.78, 0.91) | 0.000         | 0.985      | -0.021 | 0.44    | 0.632      | -0.02    | (-0.11, 0.06) | -0.012        | 0.043  | 0.784 | -0.01 | (-0.10, 0.07) |               |
| 12832.10  | ASH2L   | ASH2L       | 226                       | -0.028 | 0.19     | 0.136 | 0.03            | (-0.01, 0.06) | 0.509         | 0.241     | 0.028      | 0.039    | 0.840 | (0.78, 0.91) | 0.000         | 0.985      | -0.021 | 0.44    | 0.632      | -0.02    | (-0.11, 0.06) | -0.012        | 0.043  | 0.784 | -0.01 | (-0.10, 0.07) |               |
| 14992.20  | SH2B3   | SH2B3       | 226                       | -0.028 | 0.19     | 0.136 | 0.03            | (-0.01, 0.06) | 0.509         | 0.241     | 0.028      | 0.039    | 0.840 | (0.78, 0.91) | 0.000         | 0.985      | -0.021 | 0.44    | 0.632      | -0.02    | (-0.11, 0.06) | -0.012        | 0.043  | 0.784 | -0.01 | (-0.10, 0.07) |               |
| 3810.50   | FCGR    | FCGR        | 226                       | -0.028 | 0.19     | 0.136 | 0.03            | (-0.01, 0.06) | 0.510         | 0.241     | 0.028      | 0.039    | 0.840 | (0.78, 0.91) | 0.000         | 0.985      | -0.021 | 0.44    | 0.632      | -0.02    | (-0.11, 0.06) | -0.012        | 0.043  | 0.784 | -0.01 | (-0.10, 0.07) |               |
| 8553.68   | CFAR5   | CFAR5       | 226                       | -0.029 | 0.19     | 0.137 | 0.03            | (-0.01, 0.07) | 0.510         | 0.241     | 0.028      | 0.039    | 0.840 | (0.78, 0.91) | 0.000         | 0.985      | -0.021 | 0.44    | 0.632      | -0.02    | (-0.11, 0.06) | -0.012        | 0.043  | 0.784 | -0.01 | (-0.10, 0.07) |               |
| 8047.222  | DEFB129 | DEFB129     | 226                       | -0.029 | 0.19     | 0.137 | 0.03            | (-0.01, 0.07) | 0.510         | 0.241     | 0.028      | 0.039    | 0.840 | (0.78, 0.91) | 0.000         | 0.985      | -0.021 | 0.44    | 0.632      | -0.02    | (-0.11, 0.06) | -0.012        | 0.043  | 0.784 | -0.01 | (-0.10, 0.07) |               |
| 8089.173  | NR4A1   | NR4A1       | 226                       | -0.029 | 0.19     | 0.137 | 0.03            | (-0.01, 0.07) | 0.510         | 0.241     | 0.028      | 0.039    | 0.840 | (0.78, 0.91) | 0.000         | 0.985      | -0.021 | 0.44    | 0.632      | -0.02    | (-0.11, 0.06) | -0.012        | 0.043  | 0.784 | -0.01 | (-0.10, 0.07) |               |
| 9025.5    | AHSP    | AHSP        | 226                       | -0.029 | 0.19     | 0.137 | 0.03            | (-0.01, 0.07) | 0.510         | 0.241     | 0.028      | 0.039    | 0.840 | (0.78, 0.91) | 0.000         | 0.985      | -0.021 | 0.44    | 0.632      | -0.02    | (-0.11, 0.06) | -0.012        | 0.043  | 0.784 | -0.01 | (-0.10, 0.07) |               |
| 12343.14  | ACAP2   | ACAP2       | 226                       | -0.029 | 0.19     | 0.138 | 0.03            | (-0.01, 0.07) | 0.511         | 0.241     | 0.028      | 0.039    | 0.840 | (0.78, 0.91) | 0.000         | 0.985      | -0.021 | 0.44    | 0.632      | -0.02    | (-0.11, 0.06) | -0.012        | 0.043  | 0.784 | -0.01 | (-0.10, 0.07) |               |
| 18707.7   | PPA2    | PPA2        | 226                       | -0.027 |          |       |                 |               |               |           |            |          |       |              |               |            |        |         |            |          |               |               |        |       |       |               |               |

Table S5. Association of type 2 diabetes with Fenland plasma protein.

| SomaLogicGene | Protein  | rsnp        | b/w  |       | se/w |       | pval/w |               | CI/w  |          | MR Egger |       | Weighted median |       | Weighted mode |        |       |
|---------------|----------|-------------|------|-------|------|-------|--------|---------------|-------|----------|----------|-------|-----------------|-------|---------------|--------|-------|
|               |          |             | low  | high  | low  | high  | low    | high          | low   | high     | low      | high  | low             | high  | low           | high   |       |
| 8321_27       | ZNF43    | ZNF43       | 0.26 | -0.27 | 0.20 | 0.182 | -0.03  | (-0.07, 0.01) | 0.544 | 0.998    | 0.010    | 0.039 | 0.802           | -0.01 | (-0.09, 0.07) | -0.001 | 0.910 |
| 13559_36      | ATP11A3  | ATP11A3     | 0.26 | -0.27 | 0.20 | 0.182 | -0.03  | (-0.07, 0.01) | 0.544 | 0.998    | 0.010    | 0.039 | 0.802           | -0.01 | (-0.09, 0.07) | -0.001 | 0.910 |
| 6227_18       | KLK10    | Kalherin-10 | 0.26 | -0.30 | 0.22 | 0.182 | -0.03  | (-0.07, 0.01) | 0.544 | 4.29E-04 | -0.223   | 0.044 | 0.599           | -0.02 | (-0.11, 0.06) | 0.000  | 0.849 |
| 8454_38       | ARHGAP24 | Rho-GDIA    | 0.26 | -0.28 | 0.20 | 0.182 | -0.03  | (-0.07, 0.01) | 0.544 | 0.004    | 0.007    | 0.041 | 0.859           | -0.01 | (-0.07, 0.09) | 0.000  | 0.910 |
| 7755_37       | ITGB5    | ITGB5       | 0.26 | -0.28 | 0.20 | 0.182 | -0.03  | (-0.07, 0.01) | 0.544 | 0.008    | 0.008    | 0.041 | 0.859           | -0.01 | (-0.07, 0.09) | 0.000  | 0.910 |
| 8932_17       | PRSS57   | PRSS57      | 0.26 | -0.29 | 0.21 | 0.182 | -0.03  | (-0.07, 0.01) | 0.544 | 0.001    | -0.013   | 0.042 | 0.759           | -0.01 | (-0.11, 0.07) | -0.001 | 0.668 |
| 11154_6       | SIT1     | SIT1        | 0.26 | -0.27 | 0.19 | 0.182 | -0.03  | (-0.07, 0.01) | 0.544 | 0.361    | -0.033   | 0.039 | 0.394           | -0.03 | (-0.10, 0.04) | 0.004  | 0.777 |
| 18265_18      | ZNF34    | ZNF34       | 0.26 | -0.28 | 0.19 | 0.182 | -0.03  | (-0.07, 0.01) | 0.544 | 0.811    | -0.033   | 0.039 | 0.394           | -0.03 | (-0.10, 0.04) | 0.004  | 0.777 |
| 8951_162      | CSPG4    | CSPG4       | 0.26 | -0.30 | 0.22 | 0.182 | -0.03  | (-0.07, 0.01) | 0.544 | 0.010    | -0.009   | 0.044 | 0.829           | -0.01 | (-0.10, 0.08) | 0.002  | 0.296 |
| 19001_15      | ASB9     | ASB9        | 0.26 | -0.28 | 0.20 | 0.182 | -0.03  | (-0.07, 0.01) | 0.545 | 0.043    | -0.013   | 0.041 | 0.829           | -0.01 | (-0.10, 0.08) | 0.002  | 0.296 |
| 8409_11       | TSPB1    | TRB1        | 0.26 | -0.28 | 0.19 | 0.182 | -0.03  | (-0.07, 0.01) | 0.546 | 0.335    | 0.238    | 0.039 | 0.487           | 0.03  | (0.05, 0.10)  | -0.003 | 0.105 |
| 11531_24      | C10orf54 | G24         | 0.26 | -0.26 | 0.19 | 0.182 | -0.03  | (-0.07, 0.01) | 0.547 | 0.232    | 0.001    | 0.039 | 0.973           | 0.02  | (0.06, 0.08)  | -0.002 | 0.466 |
| 14083_25      | SEH1A1   | SPS4        | 0.26 | -0.28 | 0.19 | 0.182 | -0.03  | (-0.07, 0.01) | 0.547 | 0.038    | 0.011    | 0.039 | 0.973           | 0.02  | (0.06, 0.08)  | -0.002 | 0.466 |
| 7851_30       | ANKRD46  | ANKRD46     | 0.26 | -0.27 | 0.19 | 0.182 | -0.03  | (-0.07, 0.01) | 0.547 | 0.773    | 0.035    | 0.039 | 0.373           | 0.03  | (0.04, 0.11)  | 0.000  | 0.815 |
| 13056_1       | RMI1     | RMI1        | 0.26 | -0.28 | 0.19 | 0.182 | -0.03  | (-0.07, 0.01) | 0.549 | 0.214    | 0.012    | 0.039 | 0.751           | 0.01  | (0.04, 0.09)  | 0.001  | 0.680 |
| 19125_26      | PRKAR2A  | KAP2        | 0.26 | -0.27 | 0.19 | 0.182 | -0.03  | (-0.07, 0.01) | 0.549 | 0.863    | -0.020   | 0.040 | 0.651           | -0.02 | (-0.10, 0.06) | 0.000  | 0.845 |
| 17204_17      | PNMT     | PNMT        | 0.26 | -0.27 | 0.20 | 0.182 | -0.03  | (-0.07, 0.01) | 0.549 | 0.346    | -0.018   | 0.040 | 0.657           | -0.02 | (-0.10, 0.06) | 0.001  | 0.790 |
| 16886_28      | DISCAL1  | DISC1       | 0.26 | -0.28 | 0.19 | 0.182 | -0.03  | (-0.07, 0.01) | 0.551 | 0.753    | 0.058    | 0.038 | 0.204           | 0.03  | (0.04, 0.04)  | 0.001  | 0.686 |
| 2991_9        | IL1R1    | IL1R1       | 0.26 | -0.26 | 0.19 | 0.182 | -0.03  | (-0.07, 0.01) | 0.551 | 0.328    | 0.059    | 0.038 | 0.119           | 0.06  | (-0.13, 0.13) | -0.005 | 0.100 |
| 7266_4        | SERPINA9 | SAP9        | 0.26 | -0.25 | 0.18 | 0.182 | -0.03  | (-0.07, 0.01) | 0.551 | 0.273    | 0.030    | 0.038 | 0.418           | 0.03  | (-0.04, 0.12) | -0.003 | 0.089 |
| 8590_102      | DAC1     | DAC1        | 0.26 | -0.27 | 0.19 | 0.182 | -0.03  | (-0.07, 0.01) | 0.551 | 0.863    | -0.020   | 0.040 | 0.651           | -0.02 | (-0.10, 0.06) | 0.000  | 0.897 |
| 8885_8        | CACNA2D2 | CAC2D2      | 0.26 | -0.30 | 0.22 | 0.182 | -0.03  | (-0.07, 0.01) | 0.551 | 0.001    | 0.031    | 0.044 | 0.480           | 0.03  | (-0.06, 0.12) | -0.004 | 0.109 |
| 9366_54       | IL21R    | IL21R       | 0.26 | -0.26 | 0.19 | 0.182 | -0.03  | (-0.07, 0.01) | 0.551 | 0.460    | -0.015   | 0.038 | 0.696           | -0.01 | (-0.09, 0.06) | 0.003  | 0.216 |
| 8590_102      | DAC1     | DAC1        | 0.26 | -0.27 | 0.19 | 0.182 | -0.03  | (-0.07, 0.01) | 0.551 | 0.863    | -0.020   | 0.040 | 0.651           | -0.02 | (-0.10, 0.06) | 0.000  | 0.897 |
| 18193_165     | MORF4L1  | MOL1        | 0.26 | -0.28 | 0.19 | 0.182 | -0.03  | (-0.07, 0.01) | 0.551 | 0.462    | -0.001   | 0.038 | 0.975           | -0.17 | (-0.08, 0.07) | -0.002 | 0.453 |
| 18914_188     | FA2H     | FA2H        | 0.26 | -0.28 | 0.19 | 0.182 | -0.03  | (-0.07, 0.01) | 0.551 | 0.496    | -0.002   | 0.038 | 0.960           | -0.19 | (-0.07, 0.08) | -0.002 | 0.454 |
| 8007_7        | SCLEC4E  | Siglec4e    | 0.26 | -0.27 | 0.19 | 0.182 | -0.03  | (-0.07, 0.01) | 0.551 | 0.009    | 0.014    | 0.038 | 0.914           | 0.01  | (0.01, 0.07)  | -0.001 | 0.610 |
| 9017_58       | LCT      | LPH         | 0.26 | -0.28 | 0.19 | 0.182 | -0.03  | (-0.07, 0.01) | 0.554 | 0.019    | 0.002    | 0.041 | 0.987           | 0.17  | (-0.08, 0.08) | -0.002 | 0.404 |
| 10748_216     | PCDHB2   | PCDHB2      | 0.26 | -0.26 | 0.19 | 0.182 | -0.03  | (-0.07, 0.01) | 0.555 | 0.304    | -0.051   | 0.039 | 0.190           | 0.05  | (-0.13, 0.13) | -0.002 | 0.023 |
| 15307_38      | DEFRA    | HSD-2       | 0.26 | -0.27 | 0.19 | 0.182 | -0.03  | (-0.07, 0.01) | 0.555 | 0.100    | 0.005    | 0.039 | 0.924           | 0.01  | (0.01, 0.02)  | 0.002  | 0.244 |
| 19575_4       | EPOF     | EPOF        | 0.26 | -0.27 | 0.20 | 0.182 | -0.03  | (-0.07, 0.01) | 0.555 | 0.802    | -0.057   | 0.039 | 0.149           | -0.06 | (-0.13, 0.02) | -0.002 | 0.380 |
| 3115_64       | MAPK1    | MAPK1       | 0.26 | -0.25 | 0.18 | 0.182 | -0.03  | (-0.07, 0.01) | 0.555 | 0.738    | 0.019    | 0.038 | 0.604           | 0.02  | (-0.05, 0.09) | 0.000  | 0.851 |
| 7154_22       | LEC1     | LEC1        | 0.26 | -0.27 | 0.19 | 0.182 | -0.03  | (-0.07, 0.01) | 0.555 | 0.101    | 0.005    | 0.038 | 0.924           | 0.01  | (0.01, 0.02)  | 0.002  | 0.244 |
| 12386_16      | CRYSD    | CRYSD       | 0.26 | -0.29 | 0.21 | 0.182 | -0.03  | (-0.07, 0.01) | 0.556 | 0.017    | -0.010   | 0.043 | 0.819           | -0.01 | (-0.09, 0.07) | -0.001 | 0.602 |
| 1147_22       | SLC33A3  | SLC33A3     | 0.26 | -0.28 | 0.19 | 0.182 | -0.03  | (-0.07, 0.01) | 0.556 | 0.189    | -0.015   | 0.038 | 0.829           | -0.01 | (-0.09, 0.07) | -0.001 | 0.602 |
| 4908_6        | ENK      | Endoglin    | 0.26 | -0.30 | 0.22 | 0.182 | -0.03  | (-0.07, 0.01) | 0.556 | 4.55E-05 | 0.336    | 0.044 | 0.411           | 0.04  | (-0.02, 0.12) | -0.004 | 0.084 |
| 7789_182      | PRDX4    | PRDX4       | 0.26 | -0.28 | 0.19 | 0.182 | -0.03  | (-0.07, 0.01) | 0.556 | 0.172    | 0.061    | 0.040 | 0.123           | 0.06  | (-0.05, 0.14) | -0.002 | 0.304 |
| 2381_52       | CS       | CS          | 0.26 | -0.28 | 0.19 | 0.182 | -0.03  | (-0.07, 0.01) | 0.556 | 0.038    | 0.010    | 0.038 | 0.950           | 0.01  | (0.01, 0.02)  | 0.002  | 0.414 |
| 6060_2        | PIP      | PIP         | 0.26 | -0.29 | 0.21 | 0.182 | -0.03  | (-0.07, 0.01) | 0.557 | 0.002    | 0.014    | 0.043 | 0.754           | 0.01  | (-0.07, 0.10) | -0.003 | 0.253 |
| 10830_5       | HATP2    | HAT2        | 0.26 | -0.27 | 0.20 | 0.182 | -0.03  | (-0.07, 0.01) | 0.558 | 0.458    | -0.038   | 0.039 | 0.356           | 0.04  | (-0.11, 0.04) | 0.004  | 0.066 |
| 11190_129     | MYL1     | MYL1        | 0.26 | -0.29 | 0.19 | 0.182 | -0.03  | (-0.07, 0.01) | 0.558 | 0.211    | 0.009    | 0.038 | 0.924           | 0.01  | (0.01, 0.02)  | 0.002  | 0.244 |
| 11951_233     | NHEJ1    | NHEJ1       | 0.26 | -0.28 | 0.19 | 0.182 | -0.03  | (-0.07, 0.01) | 0.558 | 0.246    | 0.013    | 0.038 | 0.290           | 0.04  | (-0.03, 0.12) | -0.001 | 0.655 |
| 12767_164     | FLI      | FLI         | 0.26 | -0.25 | 0.18 | 0.182 | -0.03  | (-0.07, 0.01) | 0.558 | 0.427    | -0.031   | 0.037 | 0.412           | -0.03 | (-0.10, 0.04) | 0.000  | 0.808 |
| 8695_9        | DEFB12   | DEFB12      | 0.26 | -0.28 | 0.19 | 0.182 | -0.03  | (-0.07, 0.01) | 0.558 | 0.456    | -0.039   | 0.038 | 0.950           | -0.02 | (-0.10, 0.06) | -0.001 | 0.680 |
| 8482_18       | HLI      | HGH         | 0.26 | -0.27 | 0.19 | 0.182 | -0.03  | (-0.07, 0.01) | 0.558 | 0.640    | -0.045   | 0.039 | 0.256           | 0.04  | (-0.12, 0.03) | 0.001  | 0.597 |
| 16933_3       | FADD     | FADD        | 0.26 | -0.29 | 0.19 | 0.182 | -0.03  | (-0.07, 0.01) | 0.558 | 0.167    | 0.045    | 0.040 | 0.264           | 0.05  | (-0.03, 0.12) | 0.005  | 0.441 |
| 1815_38       | RTD4     | RTD4        | 0.26 | -0.27 | 0.19 | 0.182 | -0.03  | (-0.07, 0.01) | 0.558 | 0.048    | 0.048    | 0.038 | 0.950           | 0.01  | (0.01, 0.02)  | 0.002  | 0.244 |
| 18401_18      | ALKBK3   | ALKBK3      | 0.26 | -0.25 | 0.19 | 0.182 | -0.03  | (-0.07, 0.01) | 0.558 | 0.261    | 0.021    | 0.038 | 0.586           | 0.02  | (-0.05, 0.10) | 0.000  | 0.897 |
| 4642_62       | GPC3     | Glypican-3  | 0.26 | -0.29 | 0.21 | 0.182 | -0.03  | (-0.07, 0.01) | 0.558 | 0.004    | 0.063    | 0.042 | 0.137           | 0.06  | (-0.02, 0.15) | -0.008 | 0.013 |
| 5002_11       | MSN      | MSN         | 0.26 | -0.27 | 0.19 | 0.182 | -0.03  | (-0.07, 0.01) | 0.558 | 0.045    | 0.035    | 0.042 | 0.972           | 0.01  | (0.01, 0.02)  | 0.002  | 0.244 |
| 5354_11       | KRT18    | Keratin-18  | 0.26 | -0.28 | 0.19 | 0.182 | -0.03  | (-0.07, 0.01) | 0.558 | 0.898    | -0.021   | 0.038 | 0.582           | -0.02 | (-0.06, 0.10) | -0.000 | 0.877 |
| 7921_55       | FJX1     | FJX1        | 0.26 | -0.28 | 0.19 | 0.182 | -0.03  | (-0.07, 0.01) | 0.558 | 0.147    | -0.028   | 0.040 | 0.692           | -0.04 | (-0.13, 0.05) | -0.001 | 0.605 |
| 8633_84       | MEF2C    | MEF2C       | 0.26 | -0.25 | 0.18 | 0.182 | -0.03  | (-0.07, 0.01) | 0.558 | 0.251    | -0.012   | 0.037 | 0.752           | -0.01 | (-0.09, 0.07) | -0.001 | 0.602 |
| 2714_78       | AMP1     | AMP2        | 0.26 | -0.29 | 0.21 | 0.182 | -0.03  | (-0.07, 0.01) | 0.558 | 0.009    | 0.072    | 0.043 | 0.094           | 0.07  | (-0.01, 0.16) | -0.003 | 0.249 |
| 7911_29       | SCAB1    | SCAB1       | 0.26 | -0.28 | 0.19 | 0.182 | -0.03  | (-0.07, 0.01) | 0.558 | 0.005    | 0.005    | 0.038 | 0.960           | -0.01 | (-0.09, 0.07) | -0.001 | 0.605 |
| 12562_1       | PKN1     | PKN1        | 0.26 | -0.24 | 0.18 | 0.182 | -0.03  | (-0.07, 0.01) | 0.558 | 0.632    | -0.040   | 0.035 | 0.905           | -0.22 | (-0.07, 0.07) | -0.002 | 0.360 |
| 13339_131     | KCNK11   | KCNK11      | 0.26 | -0.27 | 0.19 | 0.182 | -0.03  | (-0.07, 0.01) | 0.560 | 0.299    | 0.012    | 0.040 | 0.774           | 0.01  | (-0.07, 0.09) | 0.001  | 0.689 |
| 16323_5       | NRXN3    | NRXN3       | 0.26 | -0.27 | 0.19 | 0.182 | -      |               |       |          |          |       |                 |       |               |        |       |

Table S5. Association of type 2 diabetes with Ferland plasma protein.

| SomaLogic Gene | Protein  | rnp           | Inverse variance weighted |        |          |        | MR Egger |       |        |          | Weighted median |       |       |       | Weighted mode |        |         |           |        |       |       |       |       |       |       |      |      |      |      |
|----------------|----------|---------------|---------------------------|--------|----------|--------|----------|-------|--------|----------|-----------------|-------|-------|-------|---------------|--------|---------|-----------|--------|-------|-------|-------|-------|-------|-------|------|------|------|------|
|                |          |               | b1w                       | se.b1w | pval.b1w | CI_low | FOR_Irw  | b1w   | se.b1w | pval.b1w | CI_low          | egger | egger | egger | egger         | b.mode | se.mode | pval.mode | CI_low |       |       |       |       |       |       |      |      |      |      |
| 13717.15       | FCN2     | FCN2          | 0.26                      | 0.029  | 0.023    | 0.198  | 0.033    | 0.027 | 0.591  | 9.06E-05 | 0.075           | 0.046 | 0.104 | 0.077 | 0.019         | -0.003 | 0.253   | 0.091     | 0.039  | 0.021 | 0.099 | 0.117 | 0.111 | 0.044 | 0.012 | 0.11 | 0.02 | 0.20 |      |
| 6250.53        | MPH24    | MPH24         | 0.26                      | 0.029  | 0.023    | 0.198  | 0.033    | 0.027 | 0.591  | 9.06E-05 | 0.075           | 0.046 | 0.104 | 0.077 | 0.019         | -0.003 | 0.253   | 0.091     | 0.039  | 0.021 | 0.099 | 0.117 | 0.111 | 0.044 | 0.012 | 0.11 | 0.02 | 0.20 |      |
| 10667.78       | CD181    | CD181         | 0.26                      | 0.029  | 0.023    | 0.198  | 0.033    | 0.027 | 0.591  | 9.06E-05 | 0.075           | 0.046 | 0.104 | 0.077 | 0.019         | -0.003 | 0.253   | 0.091     | 0.039  | 0.021 | 0.099 | 0.117 | 0.111 | 0.044 | 0.012 | 0.11 | 0.02 | 0.20 |      |
| 9008.51        | SOOT2    | SOOT2         | 0.26                      | 0.029  | 0.023    | 0.198  | 0.033    | 0.027 | 0.591  | 9.06E-05 | 0.075           | 0.046 | 0.104 | 0.077 | 0.019         | -0.003 | 0.253   | 0.091     | 0.039  | 0.021 | 0.099 | 0.117 | 0.111 | 0.044 | 0.012 | 0.11 | 0.02 | 0.20 |      |
| 8303.02        | CLD1010  | CLD1010       | 0.26                      | 0.029  | 0.023    | 0.198  | 0.033    | 0.027 | 0.591  | 9.06E-05 | 0.075           | 0.046 | 0.104 | 0.077 | 0.019         | -0.003 | 0.253   | 0.091     | 0.039  | 0.021 | 0.099 | 0.117 | 0.111 | 0.044 | 0.012 | 0.11 | 0.02 | 0.20 |      |
| 8631.33        | ERMAP    | ERMAP         | 0.26                      | 0.029  | 0.023    | 0.198  | 0.033    | 0.027 | 0.591  | 9.06E-05 | 0.075           | 0.046 | 0.104 | 0.077 | 0.019         | -0.003 | 0.253   | 0.091     | 0.039  | 0.021 | 0.099 | 0.117 | 0.111 | 0.044 | 0.012 | 0.11 | 0.02 | 0.20 |      |
| 13388.57       | PCPK1    | PCPK1         | 0.26                      | 0.029  | 0.023    | 0.198  | 0.033    | 0.027 | 0.591  | 9.06E-05 | 0.075           | 0.046 | 0.104 | 0.077 | 0.019         | -0.003 | 0.253   | 0.091     | 0.039  | 0.021 | 0.099 | 0.117 | 0.111 | 0.044 | 0.012 | 0.11 | 0.02 | 0.20 |      |
| 6460.50        | DDY18B   | DDY18B        | 0.26                      | 0.029  | 0.023    | 0.198  | 0.033    | 0.027 | 0.591  | 9.06E-05 | 0.075           | 0.046 | 0.104 | 0.077 | 0.019         | -0.003 | 0.253   | 0.091     | 0.039  | 0.021 | 0.099 | 0.117 | 0.111 | 0.044 | 0.012 | 0.11 | 0.02 | 0.20 |      |
| 8480.29        | ELFEMP1  | ELFEMP1       | 0.26                      | 0.030  | 0.024    | 0.200  | 0.033    | 0.028 | 0.593  | 4.36E-08 | 0.074           | 0.048 | 0.123 | 0.077 | 0.022         | 0.003  | 0.296   | 0.045     | 0.038  | 0.027 | 0.104 | 0.123 | 0.078 | 0.038 | 0.043 | 0.08 | 0.15 | 2.98 | 0.33 |
| 9004.24        | LDRAD4   | CRO1          | 0.26                      | 0.030  | 0.024    | 0.200  | 0.033    | 0.028 | 0.593  | 4.36E-08 | 0.074           | 0.048 | 0.123 | 0.077 | 0.022         | 0.003  | 0.296   | 0.045     | 0.038  | 0.027 | 0.104 | 0.123 | 0.078 | 0.038 | 0.043 | 0.08 | 0.15 | 2.98 | 0.33 |
| 12880.1        | SVGA     | SVGA          | 0.26                      | 0.030  | 0.024    | 0.200  | 0.033    | 0.028 | 0.593  | 4.36E-08 | 0.074           | 0.048 | 0.123 | 0.077 | 0.022         | 0.003  | 0.296   | 0.045     | 0.038  | 0.027 | 0.104 | 0.123 | 0.078 | 0.038 | 0.043 | 0.08 | 0.15 | 2.98 | 0.33 |
| 18322.15       | JMJD6    | JMJD6         | 0.26                      | 0.030  | 0.024    | 0.200  | 0.033    | 0.028 | 0.593  | 4.36E-08 | 0.074           | 0.048 | 0.123 | 0.077 | 0.022         | 0.003  | 0.296   | 0.045     | 0.038  | 0.027 | 0.104 | 0.123 | 0.078 | 0.038 | 0.043 | 0.08 | 0.15 | 2.98 | 0.33 |
| 5726.50        | FCRL1    | FCRL1         | 0.26                      | 0.030  | 0.024    | 0.200  | 0.033    | 0.028 | 0.593  | 4.36E-08 | 0.074           | 0.048 | 0.123 | 0.077 | 0.022         | 0.003  | 0.296   | 0.045     | 0.038  | 0.027 | 0.104 | 0.123 | 0.078 | 0.038 | 0.043 | 0.08 | 0.15 | 2.98 | 0.33 |
| 8075.121       | KIAA1024 | K1024         | 0.26                      | 0.030  | 0.024    | 0.200  | 0.033    | 0.028 | 0.593  | 4.36E-08 | 0.074           | 0.048 | 0.123 | 0.077 | 0.022         | 0.003  | 0.296   | 0.045     | 0.038  | 0.027 | 0.104 | 0.123 | 0.078 | 0.038 | 0.043 | 0.08 | 0.15 | 2.98 | 0.33 |
| 8766.29        | LILRA5   | LILRA5        | 0.26                      | 0.030  | 0.024    | 0.200  | 0.033    | 0.028 | 0.593  | 4.36E-08 | 0.074           | 0.048 | 0.123 | 0.077 | 0.022         | 0.003  | 0.296   | 0.045     | 0.038  | 0.027 | 0.104 | 0.123 | 0.078 | 0.038 | 0.043 | 0.08 | 0.15 | 2.98 | 0.33 |
| 8657.72        | ERLEC1   | ATPB          | 0.26                      | 0.030  | 0.024    | 0.200  | 0.033    | 0.028 | 0.593  | 4.36E-08 | 0.074           | 0.048 | 0.123 | 0.077 | 0.022         | 0.003  | 0.296   | 0.045     | 0.038  | 0.027 | 0.104 | 0.123 | 0.078 | 0.038 | 0.043 | 0.08 | 0.15 | 2.98 | 0.33 |
| 10548.14       | PLD3     | PLD3          | 0.26                      | 0.030  | 0.024    | 0.200  | 0.033    | 0.028 | 0.593  | 4.36E-08 | 0.074           | 0.048 | 0.123 | 0.077 | 0.022         | 0.003  | 0.296   | 0.045     | 0.038  | 0.027 | 0.104 | 0.123 | 0.078 | 0.038 | 0.043 | 0.08 | 0.15 | 2.98 | 0.33 |
| 11633.89       | AHSA1    | AHSA1         | 0.26                      | 0.030  | 0.024    | 0.200  | 0.033    | 0.028 | 0.593  | 4.36E-08 | 0.074           | 0.048 | 0.123 | 0.077 | 0.022         | 0.003  | 0.296   | 0.045     | 0.038  | 0.027 | 0.104 | 0.123 | 0.078 | 0.038 | 0.043 | 0.08 | 0.15 | 2.98 | 0.33 |
| 12515.45       | UC2C     | UC2C          | 0.26                      | 0.030  | 0.024    | 0.200  | 0.033    | 0.028 | 0.593  | 4.36E-08 | 0.074           | 0.048 | 0.123 | 0.077 | 0.022         | 0.003  | 0.296   | 0.045     | 0.038  | 0.027 | 0.104 | 0.123 | 0.078 | 0.038 | 0.043 | 0.08 | 0.15 | 2.98 | 0.33 |
| 17756.69       | DCTD     | DCTD          | 0.26                      | 0.030  | 0.024    | 0.200  | 0.033    | 0.028 | 0.593  | 4.36E-08 | 0.074           | 0.048 | 0.123 | 0.077 | 0.022         | 0.003  | 0.296   | 0.045     | 0.038  | 0.027 | 0.104 | 0.123 | 0.078 | 0.038 | 0.043 | 0.08 | 0.15 | 2.98 | 0.33 |
| 2747.3         | ULBP3    | ULBP3         | 0.26                      | 0.030  | 0.024    | 0.200  | 0.033    | 0.028 | 0.593  | 4.36E-08 | 0.074           | 0.048 | 0.123 | 0.077 | 0.022         | 0.003  | 0.296   | 0.045     | 0.038  | 0.027 | 0.104 | 0.123 | 0.078 | 0.038 | 0.043 | 0.08 | 0.15 | 2.98 | 0.33 |
| 3336.50        | TFPI     | TFPI          | 0.26                      | 0.030  | 0.024    | 0.200  | 0.033    | 0.028 | 0.593  | 4.36E-08 | 0.074           | 0.048 | 0.123 | 0.077 | 0.022         | 0.003  | 0.296   | 0.045     | 0.038  | 0.027 | 0.104 | 0.123 | 0.078 | 0.038 | 0.043 | 0.08 | 0.15 | 2.98 | 0.33 |
| 7975.97        | UNC5A    | UNC5A         | 0.26                      | 0.030  | 0.024    | 0.200  | 0.033    | 0.028 | 0.593  | 4.36E-08 | 0.074           | 0.048 | 0.123 | 0.077 | 0.022         | 0.003  | 0.296   | 0.045     | 0.038  | 0.027 | 0.104 | 0.123 | 0.078 | 0.038 | 0.043 | 0.08 | 0.15 | 2.98 | 0.33 |
| 8070.88        | DLG4     | DLG4          | 0.26                      | 0.030  | 0.024    | 0.200  | 0.033    | 0.028 | 0.593  | 4.36E-08 | 0.074           | 0.048 | 0.123 | 0.077 | 0.022         | 0.003  | 0.296   | 0.045     | 0.038  | 0.027 | 0.104 | 0.123 | 0.078 | 0.038 | 0.043 | 0.08 | 0.15 | 2.98 | 0.33 |
| 8336.33        | ITIH2    | ITIH2         | 0.26                      | 0.030  | 0.024    | 0.200  | 0.033    | 0.028 | 0.593  | 4.36E-08 | 0.074           | 0.048 | 0.123 | 0.077 | 0.022         | 0.003  | 0.296   | 0.045     | 0.038  | 0.027 | 0.104 | 0.123 | 0.078 | 0.038 | 0.043 | 0.08 | 0.15 | 2.98 | 0.33 |
| 13588.11       | ANXAA9   | ANXAA9        | 0.26                      | 0.030  | 0.024    | 0.200  | 0.033    | 0.028 | 0.593  | 4.36E-08 | 0.074           | 0.048 | 0.123 | 0.077 | 0.022         | 0.003  | 0.296   | 0.045     | 0.038  | 0.027 | 0.104 | 0.123 | 0.078 | 0.038 | 0.043 | 0.08 | 0.15 | 2.98 | 0.33 |
| 2833.20        | KLK4     | Kallistatin 4 | 0.26                      | 0.030  | 0.024    | 0.200  | 0.033    | 0.028 | 0.593  | 4.36E-08 | 0.074           | 0.048 | 0.123 | 0.077 | 0.022         | 0.003  | 0.296   | 0.045     | 0.038  | 0.027 | 0.104 | 0.123 | 0.078 | 0.038 | 0.043 | 0.08 | 0.15 | 2.98 | 0.33 |
| 1111.7         | TRKE     | TRKE          | 0.26                      | 0.030  | 0.024    | 0.200  | 0.033    | 0.028 | 0.593  | 4.36E-08 | 0.074           | 0.048 | 0.123 | 0.077 | 0.022         | 0.003  | 0.296   | 0.045     | 0.038  | 0.027 | 0.104 | 0.123 | 0.078 | 0.038 | 0.043 | 0.08 | 0.15 | 2.98 | 0.33 |
| 12406.119      | DIRAS3   | ARH1          | 0.26                      | 0.030  | 0.024    | 0.200  | 0.033    | 0.028 | 0.593  | 4.36E-08 | 0.074           | 0.048 | 0.123 | 0.077 | 0.022         | 0.003  | 0.296   | 0.045     | 0.038  | 0.027 | 0.104 | 0.123 | 0.078 | 0.038 | 0.043 | 0.08 | 0.15 | 2.98 | 0.33 |
| 13882.47       | CSFR     | CSFR          | 0.26                      | 0.030  | 0.024    | 0.200  | 0.033    | 0.028 | 0.593  | 4.36E-08 | 0.074           | 0.048 | 0.123 | 0.077 | 0.022         | 0.003  | 0.296   | 0.045     | 0.038  | 0.027 | 0.104 | 0.123 | 0.078 | 0.038 | 0.043 | 0.08 | 0.15 | 2.98 | 0.33 |
| 17411.55       | LFZL1    | LFZL1         | 0.26                      | 0.030  | 0.024    | 0.200  | 0.033    | 0.028 | 0.593  | 4.36E-08 | 0.074           | 0.048 | 0.123 | 0.077 | 0.022         | 0.003  | 0.296   | 0.045     | 0.038  | 0.027 | 0.104 | 0.123 | 0.078 | 0.038 | 0.043 | 0.08 | 0.15 | 2.98 | 0.33 |
| 19276.124      | SNRPG    | RUCG          | 0.26                      | 0.030  | 0.024    | 0.200  | 0.033    | 0.028 | 0.593  | 4.36E-08 | 0.074           | 0.048 | 0.123 | 0.077 | 0.022         | 0.003  | 0.296   | 0.045     | 0.038  | 0.027 | 0.104 | 0.123 | 0.078 | 0.038 | 0.043 | 0.08 | 0.15 | 2.98 | 0.33 |
| 3391.10        | PKNOX    | PKNOX         | 0.26                      | 0.030  | 0.024    | 0.200  | 0.033    | 0.028 | 0.593  | 4.36E-08 | 0.074           | 0.048 | 0.123 | 0.077 | 0.022         | 0.003  | 0.296   | 0.045     | 0.038  | 0.027 | 0.104 | 0.123 | 0.078 | 0.038 | 0.043 | 0.08 | 0.15 | 2.98 | 0.33 |
| 5261.13        | ABL2     | ABL2          | 0.26                      | 0.030  | 0.024    | 0.200  | 0.033    | 0.028 | 0.593  | 4.36E-08 | 0.074           | 0.048 | 0.123 | 0.077 | 0.022         | 0.003  | 0.296   | 0.045     | 0.038  | 0.027 | 0.104 | 0.123 | 0.078 | 0.038 | 0.043 | 0.08 | 0.15 | 2.98 | 0.33 |
| 5493.17        | WNK3     | WNK3          | 0.26                      | 0.030  | 0.024    | 0.200  | 0.033    | 0.028 | 0.593  | 4.36E-08 | 0.074           | 0.048 | 0.123 | 0.077 | 0.022         | 0.003  | 0.296   | 0.045     | 0.038  | 0.027 | 0.104 | 0.123 | 0.078 | 0.038 | 0.043 | 0.08 | 0.15 | 2.98 | 0.33 |
| 6554.12        | GNAT2    | GNAT2         | 0.26                      | 0.030  | 0.024    | 0.200  | 0.033    | 0.028 | 0.593  | 4.36E-08 | 0.074           | 0.048 | 0.123 | 0.077 | 0.022         | 0.003  | 0.296   | 0.045     | 0.038  | 0.027 | 0.104 | 0.123 | 0.078 | 0.038 | 0.043 | 0.08 | 0.15 | 2.98 | 0.33 |
| 6870.23        | SEM3     | SEM3          | 0.26                      | 0.030  | 0.024    | 0.200  | 0.033    | 0.028 | 0.593  | 4.36E-08 | 0.074           | 0.048 | 0.123 | 0.077 | 0.022         | 0.003  | 0.296   | 0.045     | 0.038  | 0.027 | 0.104 | 0.123 | 0.078 | 0.038 | 0.043 | 0.08 | 0.15 | 2.98 | 0.33 |
| 8448.38        | BAD      | Bad           | 0.26                      | 0.030  | 0.024    | 0.200  | 0.033    | 0.028 | 0.593  | 4.36E-08 | 0.074           | 0.048 | 0.123 | 0.077 | 0.022         | 0.003  | 0.296   | 0.045     | 0.038  | 0.027 | 0.104 | 0.123 | 0.078 | 0.038 | 0.043 | 0.08 | 0.15 | 2.98 | 0.33 |
| 10526.22       | HSP2D    | HSP2D         | 0.26                      | 0.030  | 0.024    | 0.200  | 0.033    | 0.028 | 0.593  | 4.36E-08 | 0.074           | 0.048 | 0.123 | 0.077 | 0.022         | 0.003  | 0.296   | 0.045     | 0.038  | 0.027 | 0.104 | 0.123 | 0.078 | 0.038 | 0.043 | 0.08 | 0.15 | 2.98 | 0.33 |
| 3290.50        | PRR4     | CD109         | 0.26                      | 0.030  | 0.024    | 0.200  | 0.033    | 0.028 | 0.593  | 4.36E-08 | 0.074           | 0.048 | 0.123 | 0.077 | 0.022         | 0.003  | 0.296   | 0.045     | 0.038  | 0.027 | 0.104 | 0.123 | 0.078 | 0.038 | 0.043 | 0.08 | 0.15 | 2.98 | 0.33 |
| 3822.54        | MAPKAPK4 | MAPKAPK4      | 0.26                      | 0.030  | 0.024    |        |          |       |        |          |                 |       |       |       |               |        |         |           |        |       |       |       |       |       |       |      |      |      |      |

Table S5. Association of type 2 diabetes with Ferland plasma protein.

| Locus     | Protein  | rsnp           | Inverse variance weighted |        | MR Egger |       | Weighted median |      | Weighted mode |       |
|-----------|----------|----------------|---------------------------|--------|----------|-------|-----------------|------|---------------|-------|
|           |          |                | b                         | se     | b        | se    | b               | se   | b             | se    |
| 12603.67  | PABP4    | PABP4          | 2.06                      | 0.222  | 0.18     | 0.235 | 0.02            | 0.01 | 0.06          | 0.008 |
| 18186.15  | TARD     | TARD           | 0.48                      | 0.031  | 0.18     | 0.023 | 0.02            | 0.01 | 0.01          | 0.001 |
| 6907.17   | TMC5A    | TMC5A          | 0.28                      | -0.026 | 0.22     | 0.235 | -0.02           | 0.02 | 0.01          | 0.001 |
| 7100.4    | LARR2    | LARR2          | 0.28                      | -0.023 | 0.19     | 0.235 | -0.02           | 0.01 | 0.01          | 0.001 |
| 8950.4    | CLCA2    | CLCA2          | 0.28                      | -0.023 | 0.19     | 0.235 | -0.02           | 0.01 | 0.01          | 0.001 |
| 4717.55   | L3       | L3             | 0.28                      | -0.023 | 0.19     | 0.235 | -0.02           | 0.01 | 0.01          | 0.001 |
| 11965.58  | ZNF23    | ZNF23          | 0.28                      | -0.023 | 0.19     | 0.235 | -0.02           | 0.01 | 0.01          | 0.001 |
| 12844.83  | ADSS     | PURHA2         | 0.28                      | -0.023 | 0.19     | 0.235 | -0.02           | 0.01 | 0.01          | 0.001 |
| 12684.28  | DIM1     | DIM1           | 0.28                      | -0.023 | 0.19     | 0.235 | -0.02           | 0.01 | 0.01          | 0.001 |
| 5813.58   | EMO1     | Epo            | 0.28                      | -0.023 | 0.19     | 0.235 | -0.02           | 0.01 | 0.01          | 0.001 |
| 7695.52   | QSOX1    | QSOX2          | 0.28                      | -0.023 | 0.19     | 0.235 | -0.02           | 0.01 | 0.01          | 0.001 |
| 9758.17   | RSX4     | RSX4           | 0.28                      | -0.023 | 0.19     | 0.235 | -0.02           | 0.01 | 0.01          | 0.001 |
| 12373.73  | TRAB2    | TRAB2          | 0.28                      | -0.023 | 0.19     | 0.235 | -0.02           | 0.01 | 0.01          | 0.001 |
| 18864.7   | PRSS3    | TR3            | 0.28                      | -0.023 | 0.19     | 0.235 | -0.02           | 0.01 | 0.01          | 0.001 |
| 4851.25   | L1A      | L1a            | 0.28                      | -0.023 | 0.19     | 0.235 | -0.02           | 0.01 | 0.01          | 0.001 |
| 19156.73  | HOPX     | HOPX           | 0.28                      | -0.023 | 0.19     | 0.235 | -0.02           | 0.01 | 0.01          | 0.001 |
| 12585.39  | ERCDC1   | ERCDC1         | 0.28                      | -0.023 | 0.19     | 0.235 | -0.02           | 0.01 | 0.01          | 0.001 |
| 1830.1    | ITLN1    | Omentin        | 0.28                      | -0.023 | 0.19     | 0.235 | -0.02           | 0.01 | 0.01          | 0.001 |
| 2696.55   | L4       | L4             | 0.28                      | -0.023 | 0.19     | 0.235 | -0.02           | 0.01 | 0.01          | 0.001 |
| 3875.82   | ARD3A    | ARD3A          | 0.28                      | -0.023 | 0.19     | 0.235 | -0.02           | 0.01 | 0.01          | 0.001 |
| 12647.52  | SETD2    | SETD2          | 0.28                      | -0.023 | 0.19     | 0.235 | -0.02           | 0.01 | 0.01          | 0.001 |
| 3420.21   | CAN1     | Catecholamin   | 0.28                      | -0.023 | 0.19     | 0.235 | -0.02           | 0.01 | 0.01          | 0.001 |
| 8999.19   | CEACAM3  | CEAM3          | 0.28                      | -0.023 | 0.19     | 0.235 | -0.02           | 0.01 | 0.01          | 0.001 |
| 13113.7   | SFP1     | Osteopontin    | 0.28                      | -0.023 | 0.19     | 0.235 | -0.02           | 0.01 | 0.01          | 0.001 |
| 15589.1   | CC       | POU3f1         | 0.28                      | -0.023 | 0.19     | 0.235 | -0.02           | 0.01 | 0.01          | 0.001 |
| 8975.70   | THOC1    | THOC1          | 0.28                      | -0.023 | 0.19     | 0.235 | -0.02           | 0.01 | 0.01          | 0.001 |
| 9883.97   | PRSS35   | PRSS35         | 0.28                      | -0.023 | 0.19     | 0.235 | -0.02           | 0.01 | 0.01          | 0.001 |
| 10584.7   | NDR45A   | NDR45A         | 0.28                      | -0.023 | 0.19     | 0.235 | -0.02           | 0.01 | 0.01          | 0.001 |
| 11596.47  | ZNF50    | ZNF50          | 0.28                      | -0.023 | 0.19     | 0.235 | -0.02           | 0.01 | 0.01          | 0.001 |
| 13098.93  | FGF2     | VEGF-D         | 0.28                      | -0.023 | 0.19     | 0.235 | -0.02           | 0.01 | 0.01          | 0.001 |
| 16585.16  | BGN2T4   | BGN2T4         | 0.28                      | -0.023 | 0.19     | 0.235 | -0.02           | 0.01 | 0.01          | 0.001 |
| 3033.57   | LGALS2   | Galectin-2     | 0.28                      | -0.023 | 0.19     | 0.235 | -0.02           | 0.01 | 0.01          | 0.001 |
| 7625.27   | YWHQ4    | 14-3-3 $\beta$ | 0.28                      | -0.023 | 0.19     | 0.235 | -0.02           | 0.01 | 0.01          | 0.001 |
| 8036.75   | FSH1     | FSH1           | 0.28                      | -0.023 | 0.19     | 0.235 | -0.02           | 0.01 | 0.01          | 0.001 |
| 8454.31   | RPM3     | RPM3           | 0.28                      | -0.023 | 0.19     | 0.235 | -0.02           | 0.01 | 0.01          | 0.001 |
| 8454.31   | RPM3     | RPM3           | 0.28                      | -0.023 | 0.19     | 0.235 | -0.02           | 0.01 | 0.01          | 0.001 |
| 8454.31   | RPM3     | RPM3           | 0.28                      | -0.023 | 0.19     | 0.235 | -0.02           | 0.01 | 0.01          | 0.001 |
| 7981.20   | B3GALT6  | B3GALT6        | 0.28                      | -0.023 | 0.19     | 0.235 | -0.02           | 0.01 | 0.01          | 0.001 |
| 14024.19  | EDA      | EDA            | 0.28                      | -0.023 | 0.19     | 0.235 | -0.02           | 0.01 | 0.01          | 0.001 |
| 14067.5   | PNP2     | PNP2           | 0.28                      | -0.023 | 0.19     | 0.235 | -0.02           | 0.01 | 0.01          | 0.001 |
| 5589.66   | MNPP3    | MNPP3          | 0.28                      | -0.023 | 0.19     | 0.235 | -0.02           | 0.01 | 0.01          | 0.001 |
| 7018.10   | TRP1     | TRP1           | 0.28                      | -0.023 | 0.19     | 0.235 | -0.02           | 0.01 | 0.01          | 0.001 |
| 7175.4    | PCDHGA2  | PCDHGA2        | 0.28                      | -0.023 | 0.19     | 0.235 | -0.02           | 0.01 | 0.01          | 0.001 |
| 7958.11   | MNOS1    | MOS1           | 0.28                      | -0.023 | 0.19     | 0.235 | -0.02           | 0.01 | 0.01          | 0.001 |
| 8881.93   | PGRC2    | PGRC2          | 0.28                      | -0.023 | 0.19     | 0.235 | -0.02           | 0.01 | 0.01          | 0.001 |
| 9274.3    | CPA2     | CPA2           | 0.28                      | -0.023 | 0.19     | 0.235 | -0.02           | 0.01 | 0.01          | 0.001 |
| 9669.8    | SLC22A16 | S22AG          | 0.28                      | -0.023 | 0.19     | 0.235 | -0.02           | 0.01 | 0.01          | 0.001 |
| 4396.54   | IFNL1    | IFN-lambda3    | 0.28                      | -0.023 | 0.19     | 0.235 | -0.02           | 0.01 | 0.01          | 0.001 |
| 7007.24   | TRAPPC4  | TRAPPC4        | 0.28                      | -0.023 | 0.19     | 0.235 | -0.02           | 0.01 | 0.01          | 0.001 |
| 10666.7   | RNTP2    | GNPTG          | 0.28                      | -0.023 | 0.19     | 0.235 | -0.02           | 0.01 | 0.01          | 0.001 |
| 17516.7   | RAB2A    | Rab2a          | 0.28                      | -0.023 | 0.19     | 0.235 | -0.02           | 0.01 | 0.01          | 0.001 |
| 17819.30  | FAH1D1   | FAH1D1         | 0.28                      | -0.023 | 0.19     | 0.235 | -0.02           | 0.01 | 0.01          | 0.001 |
| 18925.24  | PSMA5    | Proteasome     | 0.28                      | -0.023 | 0.19     | 0.235 | -0.02           | 0.01 | 0.01          | 0.001 |
| 18442.1   | GMPF2    | GMPF2          | 0.28                      | -0.023 | 0.19     | 0.235 | -0.02           | 0.01 | 0.01          | 0.001 |
| 3050.7    | VWF      | VWF            | 0.28                      | -0.023 | 0.19     | 0.235 | -0.02           | 0.01 | 0.01          | 0.001 |
| 4499.78   | CHST15   | ST4S6          | 0.28                      | -0.023 | 0.19     | 0.235 | -0.02           | 0.01 | 0.01          | 0.001 |
| 8075.21   | FAM20A   | FAM20A         | 0.28                      | -0.023 | 0.19     | 0.235 | -0.02           | 0.01 | 0.01          | 0.001 |
| 3024.18   | SERPINF2 | 42-Angiopo     | 0.28                      | -0.023 | 0.19     | 0.235 | -0.02           | 0.01 | 0.01          | 0.001 |
| 9388.18   | MCEE     | MCEE           | 0.28                      | -0.023 | 0.19     | 0.235 | -0.02           | 0.01 | 0.01          | 0.001 |
| 17221.1   | LCF1     | LCF1           | 0.28                      | -0.023 | 0.19     | 0.235 | -0.02           | 0.01 | 0.01          | 0.001 |
| 19219.71  | NFTF-2   | NFTF-2         | 0.28                      | -0.023 | 0.19     | 0.235 | -0.02           | 0.01 | 0.01          | 0.001 |
| 4246.40   | LIGCAM   | NCCAM1         | 0.28                      | -0.023 | 0.19     | 0.235 | -0.02           | 0.01 | 0.01          | 0.001 |
| 7020.20   | TNFRSF10 | TNFRSF10       | 0.28                      | -0.023 | 0.19     | 0.235 | -0.02           | 0.01 | 0.01          | 0.001 |
| 8082.15   | EVAI8    | FTIB8          | 0.28                      | -0.023 | 0.19     | 0.235 | -0.02           | 0.01 | 0.01          | 0.001 |
| 6282.14   | L1TRB    | L1-TRB         | 0.28                      | -0.023 | 0.19     | 0.235 | -0.02           | 0.01 | 0.01          | 0.001 |
| 8374.5    | NSFR     | NSFR           | 0.28                      | -0.023 | 0.19     | 0.235 | -0.02           | 0.01 | 0.01          | 0.001 |
| 11185.145 | GCH1     | GCH1           | 0.28                      | -0.023 | 0.19     | 0.235 | -0.02           | 0.01 | 0.01          | 0.001 |
| 11645.9   | PHN1A    | PHN1A          | 0.28                      | -0.023 | 0.19     | 0.235 | -0.02           | 0.01 | 0.01          | 0.001 |
| 15089.87  | BTC      | BTC            | 0.28                      | -0.023 | 0.19     | 0.235 | -0.02           | 0.01 | 0.01          | 0.001 |
| 14192.31  | PODCL2   | PODCL2         | 0.28                      | -0.023 | 0.19     | 0.235 | -0.02           | 0.01 | 0.01          | 0.001 |
| 16863.47  | NANP     | NANP           | 0.28                      | -0.023 | 0.19     | 0.235 | -0.02           | 0.01 | 0.01          | 0.001 |
| 6981.6    | CTSLB3   | ES1            | 0.28                      | -0.023 | 0.19     | 0.235 | -0.02           | 0.01 | 0.01          | 0.001 |
| 8054.6    | NXPH3    | NXPH3          | 0.28                      | -0.023 | 0.19     | 0.235 | -0.02           | 0.01 | 0.01          | 0.001 |
| 7960.53   | ADAM29   | ADAM29         | 0.28                      | -0.023 | 0.19     | 0.235 | -0.02           | 0.01 | 0.01          | 0.001 |
| 8637.8    | MFRP3L   | MFR3L          | 0.28                      | -0.023 | 0.19     | 0.235 | -0.02           | 0.01 | 0.01          | 0.001 |
| 9317.4    | LRRK25   | LRRK25         | 0.28                      | -0.023 | 0.19     | 0.235 | -0.02           | 0.01 | 0.01          | 0.001 |
| 9636.18   | EDM3A    | EDM3A          | 0.28                      | -0.023 | 0.19     | 0.235 | -0.02           | 0.01 | 0.01          | 0.001 |
| 9577.26   | SYT2     | SYT2           | 0.28                      | -0.023 | 0.19     | 0.235 | -0.02           | 0.01 | 0.01          | 0.001 |
| 13987.14  | TNFRD1   | Thioredoxin    | 0.28                      | -0.023 | 0.19     | 0.235 | -0.02           | 0.01 | 0.01          | 0.001 |
| 8391.12   | DEFB15   | DEFB15         | 0.28                      | -0.023 | 0.19     | 0.235 | -0.02           | 0.01 | 0.01          | 0.001 |
| 13548.53  | PLD3     | PLD3           | 0.28                      | -0.023 | 0.19     | 0.235 | -0.02           | 0.01 | 0.01          | 0.001 |
| 7897.75   | DLG3     | DLG3           | 0.28                      | -0.023 | 0.19     | 0.235 | -0.02           | 0.01 | 0.01          | 0.001 |
| 12451.82  | BACH1    | BACH1          | 0.28                      | -0.023 | 0.19     | 0.235 | -0.02           | 0.01 | 0.01          | 0.001 |
| 12667.2   | GBA      | GUAD           | 0.28                      | -0.023 | 0.19     | 0.235 | -0.02           | 0.01 | 0.01          | 0.001 |
| 3042.2    | MDA      | Myoglobin      | 0.28                      | -0.023 | 0.19     | 0.235 | -0.02           | 0.01 | 0.01          | 0.001 |
| 8758.13   | BDI1     | BDI1           | 0.28                      | -0.023 | 0.19     | 0.235 | -0.02           | 0.01 | 0.01          | 0.001 |
| 8676.20   | ALDOC    | aldolase C     | 0.28                      | -0.023 | 0.19     | 0.235 | -0.02           | 0.01 | 0.01          | 0.001 |
| 3823.9    | MATK     | MATK           | 0.28                      | -0.023 | 0.19     | 0.235 | -0.02           | 0.01 | 0.01          | 0.001 |
| 4131.72   | FNI      | Fibrinogen     | 0.28                      | -0.023 | 0.19     | 0.235 | -0.02           | 0.01 | 0.01          | 0.001 |
| 5687.5    | PRKCSH   | GLUB           | 0.28                      | -0.023 | 0.19     | 0.235 | -0.02           | 0.01 | 0.01          | 0.001 |
| 7127.3    | AP2A2    | AP2A2          | 0.28                      | -0.023 | 0.19     | 0.235 | -0.02           | 0.01 | 0.01          | 0.001 |
| 13545.15  | ADAM29   | ADAM29         | 0.28                      | -0.023 | 0.19     | 0.235 | -0.02           | 0.01 | 0.01          | 0.001 |
| 19333.4   | HNRNPK1  | HNRNPK1        | 0.28                      | -0.023 | 0.19     | 0.235 | -0.02           | 0.01 | 0.01          | 0.001 |
| 10716.25  | PSMD5    | PSMD5          | 0.28                      | -0.023 | 0.19     | 0.235 | -0.02           | 0.01 | 0.01          | 0.001 |
| 19252.67  | PSMB2    | PSB2           | 0.28                      | -0.023 | 0.19     | 0.235 | -0.02           | 0.01 | 0.01          | 0.001 |
| 3206.4    | LYVE1    | LYVE1          | 0.28                      | -0.023 | 0.19     | 0.235 | -0.02           | 0.01 | 0.01          | 0.001 |
| 8326.20   | BMF4     | BMF4           | 0.28                      | -0.023 | 0.19     | 0.235 | -0.02           | 0.01 | 0.01          | 0.001 |
| 2972.57   | BMP7     | BMP7           | 0.28                      | -0.023 | 0.19     | 0.235 | -0.02           | 0.01 | 0.01          | 0.001 |
| 18309.18  | CSF1     | CSF1           | 0.28                      | -0.023 | 0.19     | 0.235 | -0.02           | 0.01 | 0.01          | 0.001 |
| 11275.94  | LFBP1    | LFBP1          | 0.28                      | -0.023 | 0.19     | 0.235 | -0.02           | 0.01 | 0.01          | 0.001 |
| 11616.9   | HSF1     |                |                           |        |          |       |                 |      |               |       |



Table S5. Association of type 2 diabetes with Ferland plasma protein.

| SomaLogE Gene | Protein   | tsp              | Inverse variance weighted |      | MR Egger |                          | Weighted median |       | Weighted mode |                   |
|---------------|-----------|------------------|---------------------------|------|----------|--------------------------|-----------------|-------|---------------|-------------------|
|               |           |                  | b                         | se   | b        | se                       | b               | se    | b             | se                |
| 1828.34       | FLRT3     | FLRT3            | 0.21                      | 0.19 | 0.273    | 0.02 (0.2, 0.06)         | 0.668           | 0.374 | 0.101         | 0.09 (0.09, 0.07) |
| 15372.43      | BRD2      | BRD2             | 0.26                      | 0.19 | 0.168    | 0.02 (0.15, 0.08)        | 0.668           | 0.374 | 0.101         | 0.09 (0.09, 0.07) |
| 18012.26      | ARL1      | ARL1             | 0.26                      | 0.21 | 0.020    | 0.02 (0.02, 0.00)        | 0.668           | 0.374 | 0.101         | 0.09 (0.09, 0.07) |
| 15012.67      | AK1       | Mykinesin        | 0.26                      | 0.20 | 0.018    | 0.274 -0.02 (0.05, 0.02) | 0.668           | 0.374 | 0.101         | 0.09 (0.09, 0.07) |
| 12923.51      | KRT17     | KRT17            | 0.26                      | 0.20 | 0.018    | 0.274 -0.02 (0.05, 0.02) | 0.668           | 0.374 | 0.101         | 0.09 (0.09, 0.07) |
| 4982.54       | PL3       | Ela1n            | 0.26                      | 0.20 | 0.022    | 0.274 -0.02 (0.07, 0.02) | 0.668           | 0.374 | 0.101         | 0.09 (0.09, 0.07) |
| 17749.20      | UBE2B     | UBE2B            | 0.26                      | 0.20 | 0.021    | 0.275 -0.02 (0.08, 0.02) | 0.670           | 0.375 | 0.102         | 0.09 (0.09, 0.07) |
| 1519.34       | CPB2      | TAF11            | 0.26                      | 0.20 | 0.019    | 0.277 -0.02 (0.07, 0.02) | 0.671           | 0.376 | 0.102         | 0.09 (0.09, 0.07) |
| 5825.49       | IFNGR1    | IFNGR1           | 0.26                      | 0.20 | 0.019    | 0.275 -0.02 (0.08, 0.02) | 0.671           | 0.376 | 0.102         | 0.09 (0.09, 0.07) |
| 11659.31      | CLNT1     | CLNT1            | 0.26                      | 0.20 | 0.018    | 0.276 -0.02 (0.08, 0.02) | 0.671           | 0.376 | 0.102         | 0.09 (0.09, 0.07) |
| 14519.16      | ZNF323    | ZNF323           | 0.26                      | 0.20 | 0.019    | 0.277 -0.02 (0.08, 0.02) | 0.671           | 0.376 | 0.102         | 0.09 (0.09, 0.07) |
| 8905.20       | KCMB3     | KCMB3            | 0.26                      | 0.20 | 0.024    | 0.276 0.03 (0.02, 0.07)  | 0.671           | 0.376 | 0.102         | 0.09 (0.09, 0.07) |
| 13041.47      | TRAF4     | TRAF4            | 0.26                      | 0.20 | 0.021    | 0.276 -0.02 (0.08, 0.02) | 0.671           | 0.376 | 0.102         | 0.09 (0.09, 0.07) |
| 15343.2       | PFZD2     | PFZD2            | 0.26                      | 0.20 | 0.021    | 0.276 -0.02 (0.08, 0.02) | 0.671           | 0.376 | 0.102         | 0.09 (0.09, 0.07) |
| 13393.46      | DERL1     | DERL1            | 0.26                      | 0.20 | 0.019    | 0.277 -0.02 (0.08, 0.02) | 0.673           | 0.377 | 0.102         | 0.09 (0.09, 0.07) |
| 12980.31      | RANBP2    | RANBP2           | 0.26                      | 0.20 | 0.020    | 0.279 -0.02 (0.08, 0.02) | 0.673           | 0.377 | 0.102         | 0.09 (0.09, 0.07) |
| 14037.18      | RANBP3    | RANBP3           | 0.26                      | 0.20 | 0.019    | 0.277 -0.02 (0.08, 0.02) | 0.673           | 0.377 | 0.102         | 0.09 (0.09, 0.07) |
| 17343.6       | SNPH      | SNPH             | 0.26                      | 0.20 | 0.019    | 0.278 -0.02 (0.08, 0.02) | 0.673           | 0.377 | 0.102         | 0.09 (0.09, 0.07) |
| 16302.2       | SPAT7     | Spenn-pro2       | 0.26                      | 0.20 | 0.021    | 0.279 -0.02 (0.08, 0.02) | 0.673           | 0.377 | 0.102         | 0.09 (0.09, 0.07) |
| 18294.12      | CCDC25    | CCDC25           | 0.26                      | 0.20 | 0.021    | 0.278 -0.02 (0.08, 0.02) | 0.673           | 0.377 | 0.102         | 0.09 (0.09, 0.07) |
| 18874.86      | CEBPA     | CEBPA            | 0.26                      | 0.20 | 0.020    | 0.279 -0.02 (0.08, 0.02) | 0.673           | 0.377 | 0.102         | 0.09 (0.09, 0.07) |
| 15564.61      | IRF4      | IRF4             | 0.26                      | 0.20 | 0.021    | 0.279 -0.02 (0.08, 0.02) | 0.673           | 0.377 | 0.102         | 0.09 (0.09, 0.07) |
| 4900.8        | C3        | C3               | 0.26                      | 0.20 | 0.022    | 0.279 0.02 (0.02, 0.06)  | 0.673           | 0.377 | 0.102         | 0.09 (0.09, 0.07) |
| 4979.34       | DPT       | DERM             | 0.26                      | 0.20 | 0.020    | 0.278 -0.02 (0.08, 0.02) | 0.673           | 0.377 | 0.102         | 0.09 (0.09, 0.07) |
| 8230.36       | CEP1      | CEP1             | 0.26                      | 0.20 | 0.019    | 0.276 -0.02 (0.08, 0.02) | 0.673           | 0.377 | 0.102         | 0.09 (0.09, 0.07) |
| 6304.8        | C10orf1   | C10orf1          | 0.26                      | 0.20 | 0.025    | 0.273 -0.03 (0.07, 0.02) | 0.673           | 0.377 | 0.102         | 0.09 (0.09, 0.07) |
| 8988.106      | ASPH      | HAH              | 0.26                      | 0.20 | 0.021    | 0.278 -0.02 (0.08, 0.02) | 0.673           | 0.377 | 0.102         | 0.09 (0.09, 0.07) |
| 8333.20       | C11orf4   | CKO4             | 0.26                      | 0.20 | 0.019    | 0.279 0.02 (0.02, 0.06)  | 0.673           | 0.377 | 0.102         | 0.09 (0.09, 0.07) |
| 10024.44      | HOGA1     | HOGA1            | 0.26                      | 0.20 | 0.021    | 0.279 0.02 (0.02, 0.06)  | 0.673           | 0.377 | 0.102         | 0.09 (0.09, 0.07) |
| 12814.17      | RNCP3     | RBM10            | 0.26                      | 0.20 | 0.020    | 0.279 -0.02 (0.08, 0.02) | 0.673           | 0.377 | 0.102         | 0.09 (0.09, 0.07) |
| 18915.26      | ITPA      | Protein-tyrosin  | 0.26                      | 0.20 | 0.019    | 0.279 0.02 (0.02, 0.06)  | 0.673           | 0.377 | 0.102         | 0.09 (0.09, 0.07) |
| 8315.5        | DEFB119   | DEFB119          | 0.26                      | 0.20 | 0.021    | 0.279 -0.02 (0.08, 0.02) | 0.673           | 0.377 | 0.102         | 0.09 (0.09, 0.07) |
| 17749.20      | CHORD1    | CAT15            | 0.26                      | 0.20 | 0.020    | 0.280 0.02 (0.02, 0.06)  | 0.673           | 0.377 | 0.102         | 0.09 (0.09, 0.07) |
| 10349.59      | RNF2      | RLA2             | 0.26                      | 0.20 | 0.021    | 0.280 0.02 (0.02, 0.06)  | 0.673           | 0.377 | 0.102         | 0.09 (0.09, 0.07) |
| 12442.4       | RHOV      | RHOV             | 0.26                      | 0.20 | 0.019    | 0.281 -0.02 (0.08, 0.02) | 0.674           | 0.378 | 0.102         | 0.09 (0.09, 0.07) |
| 15433.9       | SNZ       | SNZ              | 0.26                      | 0.20 | 0.017    | 0.280 0.02 (0.08, 0.02)  | 0.674           | 0.378 | 0.102         | 0.09 (0.09, 0.07) |
| 17329.2       | SAH1      | SAH1             | 0.26                      | 0.20 | 0.020    | 0.280 0.02 (0.08, 0.02)  | 0.674           | 0.378 | 0.102         | 0.09 (0.09, 0.07) |
| 17329.2       | SAH2      | SAH2             | 0.26                      | 0.20 | 0.022    | 0.281 0.02 (0.02, 0.06)  | 0.674           | 0.378 | 0.102         | 0.09 (0.09, 0.07) |
| 17704.74      | HSPH1     | HSPH1            | 0.26                      | 0.20 | 0.019    | 0.280 0.02 (0.08, 0.02)  | 0.674           | 0.378 | 0.102         | 0.09 (0.09, 0.07) |
| 3182.38       | ENTPD1    | CD39             | 0.26                      | 0.20 | 0.019    | 0.280 0.02 (0.08, 0.02)  | 0.674           | 0.378 | 0.102         | 0.09 (0.09, 0.07) |
| 4874.3        | ANG       | Angiogenin       | 0.26                      | 0.20 | 0.019    | 0.281 0.02 (0.02, 0.06)  | 0.674           | 0.378 | 0.102         | 0.09 (0.09, 0.07) |
| 4656.2        | EREG      | EREG             | 0.26                      | 0.20 | 0.019    | 0.280 0.02 (0.08, 0.02)  | 0.674           | 0.378 | 0.102         | 0.09 (0.09, 0.07) |
| 7818.10       | ADRM      | GBP6             | 0.26                      | 0.20 | 0.019    | 0.281 0.02 (0.02, 0.06)  | 0.674           | 0.378 | 0.102         | 0.09 (0.09, 0.07) |
| 7922.5        | GBP6      | ADRM             | 0.26                      | 0.20 | 0.021    | 0.281 -0.02 (0.08, 0.02) | 0.674           | 0.378 | 0.102         | 0.09 (0.09, 0.07) |
| 12427.8       | CCDC28    | CCDC28           | 0.26                      | 0.20 | 0.019    | 0.281 -0.02 (0.08, 0.02) | 0.674           | 0.378 | 0.102         | 0.09 (0.09, 0.07) |
| 13231.90      | IGHG3     | IgkL, Kapp       | 0.26                      | 0.20 | 0.021    | 0.282 0.02 (0.02, 0.06)  | 0.674           | 0.378 | 0.102         | 0.09 (0.09, 0.07) |
| 5653.23       | PRSS3     | PRSS3            | 0.26                      | 0.20 | 0.020    | 0.282 -0.02 (0.08, 0.02) | 0.674           | 0.378 | 0.102         | 0.09 (0.09, 0.07) |
| 8051.3        | ARHGFB1   | ARHGFB1          | 0.26                      | 0.20 | 0.019    | 0.282 -0.02 (0.08, 0.02) | 0.674           | 0.378 | 0.102         | 0.09 (0.09, 0.07) |
| 9108.87       | LYSM4     | LYSM4            | 0.26                      | 0.20 | 0.019    | 0.282 0.02 (0.02, 0.06)  | 0.674           | 0.378 | 0.102         | 0.09 (0.09, 0.07) |
| 10054.3       | GAN       | GAN              | 0.26                      | 0.20 | 0.019    | 0.283 -0.02 (0.08, 0.02) | 0.675           | 0.379 | 0.102         | 0.09 (0.09, 0.07) |
| 15524.30      | PSMA2     | PSMA2            | 0.26                      | 0.20 | 0.019    | 0.283 -0.02 (0.08, 0.02) | 0.675           | 0.379 | 0.102         | 0.09 (0.09, 0.07) |
| 3222.11       | SEMA3A    | Semaphorin       | 0.26                      | 0.20 | 0.020    | 0.283 0.02 (0.02, 0.06)  | 0.675           | 0.379 | 0.102         | 0.09 (0.09, 0.07) |
| 8715.5        | ALPPL2    | ALPPL2           | 0.26                      | 0.20 | 0.020    | 0.283 -0.02 (0.08, 0.02) | 0.675           | 0.379 | 0.102         | 0.09 (0.09, 0.07) |
| 8715.5        | CASA      | Cemaphorin       | 0.26                      | 0.20 | 0.021    | 0.283 0.02 (0.02, 0.06)  | 0.675           | 0.379 | 0.102         | 0.09 (0.09, 0.07) |
| 13491.40      | PDEBD     | PDEBD            | 0.26                      | 0.20 | 0.019    | 0.284 0.02 (0.02, 0.06)  | 0.675           | 0.379 | 0.102         | 0.09 (0.09, 0.07) |
| 10199.3       | POU2F1    | POU2F1           | 0.26                      | 0.20 | 0.019    | 0.284 0.02 (0.02, 0.06)  | 0.675           | 0.379 | 0.102         | 0.09 (0.09, 0.07) |
| 5061.27       | ICOLG3    | ICOLG3           | 0.26                      | 0.20 | 0.021    | 0.284 -0.02 (0.08, 0.02) | 0.675           | 0.379 | 0.102         | 0.09 (0.09, 0.07) |
| 5133.17       | TGFR12    | TGFR- $\beta$ II | 0.26                      | 0.20 | 0.020    | 0.284 0.02 (0.02, 0.06)  | 0.675           | 0.379 | 0.102         | 0.09 (0.09, 0.07) |
| 8715.5        | LOC101928 | LOC101928        | 0.26                      | 0.20 | 0.019    | 0.285 -0.02 (0.08, 0.02) | 0.675           | 0.379 | 0.102         | 0.09 (0.09, 0.07) |
| 11140.56      | COX1A1    | COX1A1           | 0.26                      | 0.20 | 0.024    | 0.283 -0.02 (0.07, 0.02) | 0.677           | 0.381 | 0.104         | 0.09 (0.09, 0.07) |
| 11846.4       | CHST9     | Carbohydrate     | 0.26                      | 0.20 | 0.023    | 0.286 0.03 (0.02, 0.07)  | 0.677           | 0.382 | 0.104         | 0.09 (0.09, 0.07) |
| 8715.5        | ENK1      | ENK1             | 0.26                      | 0.20 | 0.020    | 0.286 0.03 (0.02, 0.07)  | 0.677           | 0.382 | 0.104         | 0.09 (0.09, 0.07) |
| 14334.3       | RCVRN     | RECO             | 0.26                      | 0.20 | 0.022    | 0.285 -0.02 (0.08, 0.02) | 0.677           | 0.382 | 0.104         | 0.09 (0.09, 0.07) |
| 18339.207     | PSMB3     | PSB3             | 0.26                      | 0.20 | 0.019    | 0.286 0.02 (0.02, 0.06)  | 0.677           | 0.382 | 0.104         | 0.09 (0.09, 0.07) |
| 18373.8       | CEACAM6   | CEACAM6          | 0.26                      | 0.20 | 0.019    | 0.286 0.02 (0.02, 0.06)  | 0.677           | 0.382 | 0.104         | 0.09 (0.09, 0.07) |
| 18933.4       | TM64      | TM64             | 0.26                      | 0.20 | 0.019    | 0.286 -0.02 (0.08, 0.02) | 0.677           | 0.382 | 0.104         | 0.09 (0.09, 0.07) |
| 3324.51       | LY9       | LY9              | 0.26                      | 0.20 | 0.018    | 0.285 -0.02 (0.08, 0.02) | 0.677           | 0.382 | 0.104         | 0.09 (0.09, 0.07) |
| 4831.4        | SELL      | Selectin         | 0.26                      | 0.20 | 0.019    | 0.286 0.02 (0.02, 0.06)  | 0.677           | 0.382 | 0.104         | 0.09 (0.09, 0.07) |
| 7945.10       | SEMA6     | Semaphorin       | 0.26                      | 0.20 | 0.022    | 0.286 0.02 (0.02, 0.06)  | 0.677           | 0.382 | 0.104         | 0.09 (0.09, 0.07) |
| 9256.78       | NPTX1     | NPTX1            | 0.26                      | 0.20 | 0.021    | 0.285 -0.02 (0.08, 0.02) | 0.677           | 0.382 | 0.104         | 0.09 (0.09, 0.07) |
| 11444.49      | PORLRF    | PORLRF           | 0.26                      | 0.20 | 0.019    | 0.285 -0.02 (0.08, 0.02) | 0.677           | 0.382 | 0.104         | 0.09 (0.09, 0.07) |
| 5663.18       | PFV1      | PFV1             | 0.26                      | 0.20 | 0.021    | 0.287 -0.02 (0.08, 0.02) | 0.678           | 0.383 | 0.104         | 0.09 (0.09, 0.07) |
| 3652.1        | ACT1      | ACT1             | 0.26                      | 0.20 | 0.019    | 0.288 0.02 (0.02, 0.06)  | 0.678           | 0.383 | 0.104         | 0.09 (0.09, 0.07) |
| 13745.10      | PKD2      | PKD2             | 0.26                      | 0.20 | 0.021    | 0.287 -0.02 (0.08, 0.02) | 0.678           | 0.383 | 0.104         | 0.09 (0.09, 0.07) |
| 17456.53      | GOLM1     | GOLM1            | 0.26                      | 0.20 | 0.020    | 0.288 0.02 (0.02, 0.06)  | 0.678           | 0.383 | 0.104         | 0.09 (0.09, 0.07) |
| 2637.77       | MRG1      | MRG1             | 0.26                      | 0.20 | 0.020    | 0.287 0.02 (0.02, 0.06)  | 0.678           | 0.383 | 0.104         | 0.09 (0.09, 0.07) |
| 4471.50       | TM3       | TM3              | 0.26                      | 0.20 | 0.024    | 0.288 -0.02 (0.07, 0.02) | 0.679           | 0.384 | 0.104         | 0.09 (0.09, 0.07) |
| 5201.50       | PDEA3     | PDEA3            | 0.26                      | 0.20 | 0.019    | 0.288 0.02 (0.02, 0.06)  | 0.679           | 0.384 | 0.104         | 0.09 (0.09, 0.07) |
| 8506.54       | TMED10    | TMED10           | 0.26                      | 0.20 | 0.019    | 0.288 0.02 (0.02, 0.06)  | 0.679           | 0.384 | 0.104         | 0.09 (0.09, 0.07) |
| 9936.27       | LNK1      | LNK1             | 0.26                      | 0.20 | 0.023    | 0.288 0.02 (0.02, 0.06)  | 0.679           | 0.384 | 0.104         | 0.09 (0.09, 0.07) |
| 14135.3       | RXRP1     | RXRP1            | 0.26                      | 0.20 | 0.019    | 0.289 0.02 (0.02, 0.06)  | 0.679           | 0.384 | 0.104</       |                   |

Table S5. Association of type 2 diabetes with Ferndal plasma protein.

| SomaLogic Gene | CD320       | Protein         | nsnp | Inverse variance weighted |        |          |        | MR Egger      |        |        |        | Weighted median |            |               |         | Weighted mode |         |        |         |        |               |        |       |       |       |                |
|----------------|-------------|-----------------|------|---------------------------|--------|----------|--------|---------------|--------|--------|--------|-----------------|------------|---------------|---------|---------------|---------|--------|---------|--------|---------------|--------|-------|-------|-------|----------------|
|                |             |                 |      | b1w                       | se.b1w | pval.i1w | CI_low | CI_high       | FOR_Iw | Q pval | begger | se.begger       | pval.egger | CI_low        | CI_high | b.mode        | se.mode | CI_low | CI_high |        |               |        |       |       |       |                |
| 16303236       | 158         | CD320           | 226  | -0.021                    | 0.021  | 0.310    | -0.022 | (-0.08, 0.02) | 0.695  | 0.101  | -0.045 | 0.443           | 0.296      | (-0.13, 0.04) | 0.001   | 0.532         | -0.056  | 0.332  | 0.083   | -0.068 | (-0.12, 0.01) | -0.114 | 0.042 | 0.007 | -0.11 | (-0.20, -0.03) |
| 6590_54        | CB22B       | CB22B           | 226  | -0.019                    | 0.019  | 0.311    | -0.020 | (-0.08, 0.02) | 0.696  | 0.101  | -0.045 | 0.443           | 0.296      | (-0.13, 0.04) | 0.001   | 0.532         | -0.056  | 0.332  | 0.083   | -0.068 | (-0.12, 0.01) | -0.114 | 0.042 | 0.007 | -0.11 | (-0.20, -0.03) |
| 10773_58       | LEPRLP      | PLM1            | 226  | -0.019                    | 0.019  | 0.311    | -0.020 | (-0.08, 0.02) | 0.696  | 0.101  | -0.045 | 0.443           | 0.296      | (-0.13, 0.04) | 0.001   | 0.532         | -0.056  | 0.332  | 0.083   | -0.068 | (-0.12, 0.01) | -0.114 | 0.042 | 0.007 | -0.11 | (-0.20, -0.03) |
| 6273_58        | CD320       | CD320           | 226  | -0.019                    | 0.019  | 0.311    | -0.020 | (-0.08, 0.02) | 0.696  | 0.101  | -0.045 | 0.443           | 0.296      | (-0.13, 0.04) | 0.001   | 0.532         | -0.056  | 0.332  | 0.083   | -0.068 | (-0.12, 0.01) | -0.114 | 0.042 | 0.007 | -0.11 | (-0.20, -0.03) |
| 12450_42       | PMK1        | PMK1            | 226  | -0.019                    | 0.019  | 0.311    | -0.020 | (-0.08, 0.02) | 0.696  | 0.101  | -0.045 | 0.443           | 0.296      | (-0.13, 0.04) | 0.001   | 0.532         | -0.056  | 0.332  | 0.083   | -0.068 | (-0.12, 0.01) | -0.114 | 0.042 | 0.007 | -0.11 | (-0.20, -0.03) |
| 12705_9        | HERC1       | HERC1           | 226  | -0.019                    | 0.019  | 0.311    | -0.020 | (-0.08, 0.02) | 0.696  | 0.101  | -0.045 | 0.443           | 0.296      | (-0.13, 0.04) | 0.001   | 0.532         | -0.056  | 0.332  | 0.083   | -0.068 | (-0.12, 0.01) | -0.114 | 0.042 | 0.007 | -0.11 | (-0.20, -0.03) |
| 5255_22        | PDE4D       | PDE4D           | 226  | -0.020                    | 0.020  | 0.312    | -0.021 | (-0.08, 0.02) | 0.697  | 0.102  | -0.046 | 0.444           | 0.297      | (-0.13, 0.04) | 0.001   | 0.533         | -0.057  | 0.333  | 0.084   | -0.069 | (-0.12, 0.01) | -0.115 | 0.043 | 0.008 | -0.11 | (-0.20, -0.03) |
| 19814_8        | TCM1        | Hou1-2          | 226  | -0.020                    | 0.020  | 0.312    | -0.021 | (-0.08, 0.02) | 0.697  | 0.102  | -0.046 | 0.444           | 0.297      | (-0.13, 0.04) | 0.001   | 0.533         | -0.057  | 0.333  | 0.084   | -0.069 | (-0.12, 0.01) | -0.115 | 0.043 | 0.008 | -0.11 | (-0.20, -0.03) |
| 9782_14        | VASP        | VASP            | 226  | -0.019                    | 0.019  | 0.312    | -0.020 | (-0.08, 0.02) | 0.697  | 0.102  | -0.046 | 0.444           | 0.297      | (-0.13, 0.04) | 0.001   | 0.533         | -0.057  | 0.333  | 0.084   | -0.069 | (-0.12, 0.01) | -0.115 | 0.043 | 0.008 | -0.11 | (-0.20, -0.03) |
| 14132_21       | HLLA2       | HLLA2           | 226  | -0.019                    | 0.019  | 0.312    | -0.020 | (-0.08, 0.02) | 0.697  | 0.102  | -0.046 | 0.444           | 0.297      | (-0.13, 0.04) | 0.001   | 0.533         | -0.057  | 0.333  | 0.084   | -0.069 | (-0.12, 0.01) | -0.115 | 0.043 | 0.008 | -0.11 | (-0.20, -0.03) |
| 10088_38       | CS3         | CS3             | 226  | -0.019                    | 0.019  | 0.312    | -0.020 | (-0.08, 0.02) | 0.697  | 0.102  | -0.046 | 0.444           | 0.297      | (-0.13, 0.04) | 0.001   | 0.533         | -0.057  | 0.333  | 0.084   | -0.069 | (-0.12, 0.01) | -0.115 | 0.043 | 0.008 | -0.11 | (-0.20, -0.03) |
| 10772_21       | CSMANGCAGT2 |                 | 226  | -0.019                    | 0.019  | 0.312    | -0.020 | (-0.08, 0.02) | 0.697  | 0.102  | -0.046 | 0.444           | 0.297      | (-0.13, 0.04) | 0.001   | 0.533         | -0.057  | 0.333  | 0.084   | -0.069 | (-0.12, 0.01) | -0.115 | 0.043 | 0.008 | -0.11 | (-0.20, -0.03) |
| 11530_37       | HMB3        | HMB3            | 226  | -0.019                    | 0.019  | 0.312    | -0.020 | (-0.08, 0.02) | 0.697  | 0.102  | -0.046 | 0.444           | 0.297      | (-0.13, 0.04) | 0.001   | 0.533         | -0.057  | 0.333  | 0.084   | -0.069 | (-0.12, 0.01) | -0.115 | 0.043 | 0.008 | -0.11 | (-0.20, -0.03) |
| 11540_37       | FOXC4       | FOXC4           | 226  | -0.019                    | 0.019  | 0.312    | -0.020 | (-0.08, 0.02) | 0.697  | 0.102  | -0.046 | 0.444           | 0.297      | (-0.13, 0.04) | 0.001   | 0.533         | -0.057  | 0.333  | 0.084   | -0.069 | (-0.12, 0.01) | -0.115 | 0.043 | 0.008 | -0.11 | (-0.20, -0.03) |
| 12838_28       | DUSP15      | DUSP15          | 226  | -0.020                    | 0.020  | 0.312    | -0.021 | (-0.08, 0.02) | 0.698  | 0.102  | -0.046 | 0.444           | 0.297      | (-0.13, 0.04) | 0.001   | 0.533         | -0.057  | 0.333  | 0.084   | -0.069 | (-0.12, 0.01) | -0.115 | 0.043 | 0.008 | -0.11 | (-0.20, -0.03) |
| 13384_110H     | FUN1B       | FUN1B           | 226  | -0.019                    | 0.019  | 0.312    | -0.020 | (-0.08, 0.02) | 0.698  | 0.102  | -0.046 | 0.444           | 0.297      | (-0.13, 0.04) | 0.001   | 0.533         | -0.057  | 0.333  | 0.084   | -0.069 | (-0.12, 0.01) | -0.115 | 0.043 | 0.008 | -0.11 | (-0.20, -0.03) |
| 13615_10       | NCK2        | NCK2            | 226  | -0.019                    | 0.019  | 0.312    | -0.020 | (-0.08, 0.02) | 0.698  | 0.102  | -0.046 | 0.444           | 0.297      | (-0.13, 0.04) | 0.001   | 0.533         | -0.057  | 0.333  | 0.084   | -0.069 | (-0.12, 0.01) | -0.115 | 0.043 | 0.008 | -0.11 | (-0.20, -0.03) |
| 13621_31       | AP2A2       | AP2A2           | 226  | -0.018                    | 0.018  | 0.314    | -0.020 | (-0.08, 0.02) | 0.698  | 0.102  | -0.046 | 0.444           | 0.297      | (-0.13, 0.04) | 0.001   | 0.533         | -0.057  | 0.333  | 0.084   | -0.069 | (-0.12, 0.01) | -0.115 | 0.043 | 0.008 | -0.11 | (-0.20, -0.03) |
| 13680_2        | OC1         | OC1             | 226  | -0.018                    | 0.018  | 0.314    | -0.020 | (-0.08, 0.02) | 0.698  | 0.102  | -0.046 | 0.444           | 0.297      | (-0.13, 0.04) | 0.001   | 0.533         | -0.057  | 0.333  | 0.084   | -0.069 | (-0.12, 0.01) | -0.115 | 0.043 | 0.008 | -0.11 | (-0.20, -0.03) |
| 18166_4        | RHOB        | RHOB            | 226  | -0.019                    | 0.019  | 0.315    | -0.020 | (-0.08, 0.02) | 0.698  | 0.102  | -0.046 | 0.444           | 0.297      | (-0.13, 0.04) | 0.001   | 0.533         | -0.057  | 0.333  | 0.084   | -0.069 | (-0.12, 0.01) | -0.115 | 0.043 | 0.008 | -0.11 | (-0.20, -0.03) |
| 18184_28       | GMP5        | GMP5            | 226  | -0.019                    | 0.019  | 0.315    | -0.020 | (-0.08, 0.02) | 0.698  | 0.102  | -0.046 | 0.444           | 0.297      | (-0.13, 0.04) | 0.001   | 0.533         | -0.057  | 0.333  | 0.084   | -0.069 | (-0.12, 0.01) | -0.115 | 0.043 | 0.008 | -0.11 | (-0.20, -0.03) |
| 19175_27       | FAM83B      | FAM83B          | 226  | -0.019                    | 0.019  | 0.315    | -0.020 | (-0.08, 0.02) | 0.698  | 0.102  | -0.046 | 0.444           | 0.297      | (-0.13, 0.04) | 0.001   | 0.533         | -0.057  | 0.333  | 0.084   | -0.069 | (-0.12, 0.01) | -0.115 | 0.043 | 0.008 | -0.11 | (-0.20, -0.03) |
| 3078_1         | PIGF        | PIGF            | 226  | -0.019                    | 0.019  | 0.315    | -0.020 | (-0.08, 0.02) | 0.698  | 0.102  | -0.046 | 0.444           | 0.297      | (-0.13, 0.04) | 0.001   | 0.533         | -0.057  | 0.333  | 0.084   | -0.069 | (-0.12, 0.01) | -0.115 | 0.043 | 0.008 | -0.11 | (-0.20, -0.03) |
| 3903_49        | SNX4        | Sorting nexin 4 | 226  | -0.018                    | 0.018  | 0.315    | -0.020 | (-0.08, 0.02) | 0.698  | 0.102  | -0.046 | 0.444           | 0.297      | (-0.13, 0.04) | 0.001   | 0.533         | -0.057  | 0.333  | 0.084   | -0.069 | (-0.12, 0.01) | -0.115 | 0.043 | 0.008 | -0.11 | (-0.20, -0.03) |
| 4650_34        | LCK         | LCK             | 226  | -0.019                    | 0.019  | 0.315    | -0.020 | (-0.08, 0.02) | 0.698  | 0.102  | -0.046 | 0.444           | 0.297      | (-0.13, 0.04) | 0.001   | 0.533         | -0.057  | 0.333  | 0.084   | -0.069 | (-0.12, 0.01) | -0.115 | 0.043 | 0.008 | -0.11 | (-0.20, -0.03) |
| 4891_50        | GCG         | Gucyasein       | 226  | -0.020                    | 0.020  | 0.315    | -0.021 | (-0.08, 0.02) | 0.698  | 0.102  | -0.046 | 0.444           | 0.297      | (-0.13, 0.04) | 0.001   | 0.533         | -0.057  | 0.333  | 0.084   | -0.069 | (-0.12, 0.01) | -0.115 | 0.043 | 0.008 | -0.11 | (-0.20, -0.03) |
| 5109_24        | NRCAM       | N-CAM           | 226  | -0.022                    | 0.022  | 0.315    | -0.022 | (-0.08, 0.02) | 0.698  | 0.102  | -0.046 | 0.444           | 0.297      | (-0.13, 0.04) | 0.001   | 0.533         | -0.057  | 0.333  | 0.084   | -0.069 | (-0.12, 0.01) | -0.115 | 0.043 | 0.008 | -0.11 | (-0.20, -0.03) |
| 5204_20        | CSNK2A1     | CSK2A1          | 226  | -0.020                    | 0.020  | 0.315    | -0.021 | (-0.08, 0.02) | 0.698  | 0.102  | -0.046 | 0.444           | 0.297      | (-0.13, 0.04) | 0.001   | 0.533         | -0.057  | 0.333  | 0.084   | -0.069 | (-0.12, 0.01) | -0.115 | 0.043 | 0.008 | -0.11 | (-0.20, -0.03) |
| 7875_86        | PLEK        | PLEK            | 226  | -0.019                    | 0.019  | 0.315    | -0.020 | (-0.08, 0.02) | 0.698  | 0.102  | -0.046 | 0.444           | 0.297      | (-0.13, 0.04) | 0.001   | 0.533         | -0.057  | 0.333  | 0.084   | -0.069 | (-0.12, 0.01) | -0.115 | 0.043 | 0.008 | -0.11 | (-0.20, -0.03) |
| 8171_11        | CSRP3       | CSRP3           | 226  | -0.019                    | 0.019  | 0.315    | -0.020 | (-0.08, 0.02) | 0.698  | 0.102  | -0.046 | 0.444           | 0.297      | (-0.13, 0.04) | 0.001   | 0.533         | -0.057  | 0.333  | 0.084   | -0.069 | (-0.12, 0.01) | -0.115 | 0.043 | 0.008 | -0.11 | (-0.20, -0.03) |
| 8234_8         | TWIST1      | TWIST1          | 226  | -0.019                    | 0.019  | 0.315    | -0.020 | (-0.08, 0.02) | 0.698  | 0.102  | -0.046 | 0.444           | 0.297      | (-0.13, 0.04) | 0.001   | 0.533         | -0.057  | 0.333  | 0.084   | -0.069 | (-0.12, 0.01) | -0.115 | 0.043 | 0.008 | -0.11 | (-0.20, -0.03) |
| 9255_5         | LITC7       | LITC7           | 226  | -0.019                    | 0.019  | 0.315    | -0.020 | (-0.08, 0.02) | 0.698  | 0.102  | -0.046 | 0.444           | 0.297      | (-0.13, 0.04) | 0.001   | 0.533         | -0.057  | 0.333  | 0.084   | -0.069 | (-0.12, 0.01) | -0.115 | 0.043 | 0.008 | -0.11 | (-0.20, -0.03) |
| 15509          | NAGLU       | NAGLU           | 226  | -0.019                    | 0.019  | 0.315    | -0.020 | (-0.08, 0.02) | 0.698  | 0.102  | -0.046 | 0.444           | 0.297      | (-0.13, 0.04) | 0.001   | 0.533         | -0.057  | 0.333  | 0.084   | -0.069 | (-0.12, 0.01) | -0.115 | 0.043 | 0.008 | -0.11 | (-0.20, -0.03) |
| 10371_14       | MGAT1       | MGAT1           | 226  | -0.019                    | 0.019  | 0.315    | -0.020 | (-0.08, 0.02) | 0.698  | 0.102  | -0.046 | 0.444           | 0.297      | (-0.13, 0.04) | 0.001   | 0.533         | -0.057  | 0.333  | 0.084   | -0.069 | (-0.12, 0.01) | -0.115 | 0.043 | 0.008 | -0.11 | (-0.20, -0.03) |
| 10847_1        | SIGLEC15    | SIG15           | 226  | -0.020                    | 0.020  | 0.317    | -0.022 | (-0.08, 0.02) | 0.699  | 0.102  | -0.046 | 0.444           | 0.297      | (-0.13, 0.04) | 0.001   | 0.533         | -0.057  | 0.333  | 0.084   | -0.069 | (-0.12, 0.01) | -0.115 | 0.043 | 0.008 | -0.11 | (-0.20, -0.03) |
| 10874_2        | BAE2        | BAE2            | 226  | -0.019                    | 0.019  | 0.317    | -0.021 | (-0.08, 0.02) | 0.699  | 0.102  | -0.046 | 0.444           | 0.297      | (-0.13, 0.04) | 0.001   | 0.533         | -0.057  | 0.333  | 0.084   | -0.069 | (-0.12, 0.01) | -0.115 | 0.043 | 0.008 | -0.11 | (-0.20, -0.03) |
| 8511_17        | F19A4       | F19A4           | 226  | -0.019                    | 0.019  | 0.317    | -0.021 | (-0.08, 0.02) | 0.699  | 0.102  | -0.046 | 0.444           | 0.297      | (-0.13, 0.04) | 0.001   | 0.533         | -0.057  | 0.333  | 0.084   | -0.069 | (-0.12, 0.01) | -0.115 | 0.043 | 0.008 | -0.11 | (-0.20, -0.03) |
| 8274_74        | STM7K       | STM7K           | 226  | -0.019                    | 0.019  | 0.317    | -0.021 | (-0.08, 0.02) | 0.699  | 0.102  | -0.046 | 0.444           | 0.297      | (-0.13, 0.04) | 0.001   | 0.533         | -0.057  | 0.333  | 0.084   | -0.069 | (-0.12, 0.01) | -0.115 | 0.043 | 0.008 | -0.11 | (-0.20, -0.03) |
| 8946_38        | NR1H4       | NR1H4           | 226  | -0.019                    | 0.019  | 0.317    | -0.021 | (-0.08, 0.02) | 0.699  | 0.102  | -0.046 | 0.444           | 0.297      | (-0.13, 0.04) | 0.001   | 0.533         | -0.057  | 0.333  | 0.084   | -0.069 | (-0.12, 0.01) | -0.115 | 0.043 | 0.008 | -0.11 | (-0.20, -0.03) |
| 9838_4         | SMAD1       | SMAD1           | 226  | -0.018                    | 0.018  | 0.317    | -0.021 | (-0.08, 0.02) | 0.699  | 0.102  | -0.046 | 0.444           | 0.297      | (-0.13, 0.04) | 0.001   | 0.533         | -0.057  | 0.333  | 0.084   | -0.069 | (-0.12, 0.01) | -0.115 | 0.043 | 0.008 | -0.11 | (-0.20, -0.03) |
| 10916_44       | PLA2R1      | PLA2R1          | 226  | -0.021                    | 0.021  | 0.319    | -0.022 | (-0.08, 0.02) | 0.699  | 0.102  | -0.046 | 0.444           | 0.297      | (-0.13, 0.04) | 0.001   | 0.533         | -0.057  | 0.333  | 0.084   | -0.069 | (-0.12, 0.01) | -0.115 | 0.043 | 0.008 | -0.11 | (-0            |



Table S5. Association of Type 2 diabetes with Ferndal plasma protein.

| SomaLogE  | Enzyme  | rnp         | b/w | Inverse variance weighted |       | MR Egger |                    | Weighted median |          | Weighted mode |        |            |                     |          |        |         |           |        |                     |           |       |       |                     |
|-----------|---------|-------------|-----|---------------------------|-------|----------|--------------------|-----------------|----------|---------------|--------|------------|---------------------|----------|--------|---------|-----------|--------|---------------------|-----------|-------|-------|---------------------|
|           |         |             |     | b/w                       | se/bw | pval/iv  | CI_low             | FOR_low         | iv       | bagger        | segger | pval/egger | se.ed               | pval/med | b.mode | se.mode | pval/mode | b.mode | se.mode             | pval/mode |       |       |                     |
| 4884_83   | ESD     | Enestrin D  | 226 | 0.017                     | 0.19  | 0.384    | 0.02 (0.02, 0.05)  | 0.737           | 0.153    | -0.015        | 0.40   | 0.769      | -0.02 (0.09, 0.06)  | 0.002    | 0.365  | 0.003   | 0.43      | 0.849  | 0.271 (0.08, 0.10)  | -0.008    | 0.424 | 0.848 | -0.01 (0.09, 0.08)  |
| 6221_6    | TPPRL1  |             | 226 | 0.017                     | 0.19  | 0.384    | 0.02 (0.02, 0.05)  | 0.737           | 0.153    | -0.015        | 0.40   | 0.769      | -0.02 (0.09, 0.06)  | 0.002    | 0.365  | 0.003   | 0.43      | 0.849  | 0.271 (0.08, 0.10)  | -0.008    | 0.424 | 0.848 | -0.01 (0.09, 0.08)  |
| 17848_6   | DRG1    |             | 226 | 0.016                     | 0.18  | 0.384    | 0.02 (0.02, 0.05)  | 0.737           | 0.147    | -0.018        | 0.036  | 0.630      | -0.02 (0.09, 0.05)  | 0.002    | 0.293  | -0.006  | 0.029     | 0.829  | -0.01 (0.08, 0.05)  | -0.013    | 0.040 | 0.743 | -0.01 (0.09, 0.07)  |
| 8962_5    | HDLR3   | DRG3        | 226 | 0.020                     | 0.023 | 0.384    | 0.02 (0.02, 0.06)  | 0.737           | 5.20E-05 | 0.034         | 0.046  | 0.488      | 0.03 (0.08, 0.12)   | 0.001    | 0.733  | 0.017   | 0.472     | 0.879  | 0.02 (0.07, 0.10)   | 0.021     | 0.041 | 0.818 | 0.02 (0.07, 0.10)   |
| 3813_3    | PNL     | 407         | 226 | 0.017                     | 0.19  | 0.385    | 0.02 (0.02, 0.05)  | 0.738           | 0.158    | -0.015        | 0.036  | 0.630      | -0.02 (0.09, 0.05)  | 0.002    | 0.293  | -0.006  | 0.029     | 0.829  | -0.01 (0.08, 0.05)  | -0.013    | 0.040 | 0.743 | -0.01 (0.09, 0.07)  |
| 8604_39   | COL20A1 | COXA1       | 226 | -0.017                    | 0.19  | 0.385    | -0.02 (0.02, 0.02) | 0.738           | 0.118    | 0.008         | 0.042  | 0.856      | 0.01 (-0.07, 0.09)  | -0.002   | -0.488 | 0.038   | 0.038     | 0.292  | 0.04 (-0.03, 0.11)  | 0.031     | 0.041 | 0.455 | 0.03 (-0.05, 0.10)  |
| 4477_32   | CKL13   | WPCF1       | 226 | -0.017                    | 0.19  | 0.385    | -0.02 (0.02, 0.02) | 0.738           | 0.106    | -0.005        | 0.041  | 0.971      | -0.01 (-0.09, 0.08) | -0.001   | 0.738  | 0.005   | 0.037     | 0.884  | -0.01 (0.07, 0.08)  | -0.009    | 0.048 | 0.859 | -0.01 (0.09, 0.08)  |
| 9931_20   | KRT1    | Keratin-1   | 226 | 0.016                     | 0.19  | 0.387    | 0.02 (0.02, 0.05)  | 0.741           | 0.158    | -0.008        | 0.037  | 0.823      | -0.01 (0.08, 0.07)  | 0.002    | 0.453  | -0.007  | 0.038     | 0.855  | -0.01 (0.08, 0.07)  | -0.029    | 0.038 | 0.444 | -0.03 (-0.10, 0.04) |
| 19329_31  | HRP3    | HPK3        | 226 | 0.016                     | 0.19  | 0.388    | 0.02 (0.02, 0.05)  | 0.741           | 0.141    | 0.033         | 0.040  | 0.409      | 0.03 (0.05, 0.11)   | 0.001    | 0.630  | 0.012   | 0.348     | 0.741  | 0.01 (0.06, 0.09)   | 0.016     | 0.039 | 0.677 | 0.02 (0.06, 0.09)   |
| 2730_54   | PP3P    | NAP-2       | 226 | 0.016                     | 0.19  | 0.388    | 0.02 (0.02, 0.05)  | 0.741           | 0.225    | 0.019         | 0.042  | 0.268      | 0.03 (0.06, 0.08)   | 0.001    | 0.403  | 0.017   | 0.348     | 0.741  | 0.01 (0.06, 0.09)   | 0.016     | 0.039 | 0.677 | 0.02 (0.06, 0.09)   |
| 3284_75   | BMN     | BGN         | 226 | -0.017                    | 0.20  | 0.388    | -0.02 (0.02, 0.02) | 0.741           | 0.039    | -0.016        | 0.040  | 0.685      | -0.02 (0.10, 0.06)  | 0.000    | 0.980  | -0.012  | 0.037     | 0.742  | -0.01 (0.08, 0.06)  | -0.026    | 0.039 | 0.504 | -0.03 (-0.10, 0.05) |
| 8424_289  | CTNNA1  | C-actinin   | 226 | 0.017                     | 0.19  | 0.387    | 0.02 (0.02, 0.05)  | 0.741           | 0.783    | -0.034        | 0.039  | 0.362      | -0.03 (0.11, 0.04)  | 0.003    | 0.134  | 0.000   | 0.040     | 0.992  | -0.18 (-0.04, 0.00) | 0.007     | 0.041 | 0.860 | -0.01 (0.07, 0.09)  |
| 16367_74  | CARD17  | CARD17      | 226 | 0.017                     | 0.19  | 0.389    | 0.02 (0.02, 0.05)  | 0.743           | 0.865    | -0.054        | 0.038  | 0.101      | -0.07 (0.13, 0.02)  | 0.004    | 0.035  | 0.008   | 0.040     | 0.835  | -0.01 (0.08, 0.07)  | -0.017    | 0.046 | 0.818 | -0.02 (0.10, 0.06)  |
| 7082_2    | B3GNT6  | B3GNT6      | 226 | 0.019                     | 0.22  | 0.389    | 0.02 (0.02, 0.06)  | 0.743           | 0.027    | -0.033        | 0.045  | 0.461      | -0.03 (0.12, 0.05)  | 0.003    | 0.181  | 0.022   | 0.042     | 0.992  | 0.02 (0.06, 0.10)   | 0.010     | 0.041 | 0.811 | 0.01 (0.07, 0.09)   |
| 8470_213  | RNASEH1 | RNASEH1     | 226 | -0.018                    | 0.21  | 0.390    | -0.02 (0.02, 0.02) | 0.743           | 0.027    | -0.039        | 0.042  | 0.362      | -0.03 (0.12, 0.05)  | 0.001    | 0.557  | 0.006   | 0.031     | 0.775  | -0.01 (0.08, 0.07)  | -0.008    | 0.041 | 0.825 | -0.10 (0.18, 0.11)  |
| 8014_39   | MANEA   |             | 226 | -0.018                    | 0.21  | 0.390    | -0.02 (0.02, 0.02) | 0.744           | 0.037    | -0.046        | 0.042  | 0.268      | 0.05 (0.10, 0.04)   | 0.004    | 0.077  | 0.011   | 0.039     | 0.911  | 0.03 (0.08, 0.07)   | 0.008     | 0.041 | 0.818 | 0.01 (0.07, 0.09)   |
| 12493_42  | OTUB2   | OTUB2       | 226 | 0.016                     | 0.18  | 0.390    | 0.02 (0.02, 0.05)  | 0.744           | 0.144    | -0.010        | 0.039  | 0.778      | -0.01 (0.09, 0.07)  | 0.002    | 0.446  | 0.015   | 0.033     | 0.839  | -0.02 (0.08, 0.05)  | -0.023    | 0.040 | 0.569 | -0.02 (-0.10, 0.06) |
| 10704_91  | LIMP    | LRMP2       | 226 | 0.015                     | 0.18  | 0.392    | 0.02 (0.02, 0.05)  | 0.744           | 0.368    | 0.050         | 0.029  | 0.267      | 0.03 (0.05, 0.11)   | -0.002   | 0.338  | 0.052   | 0.039     | 0.184  | 0.02 (0.02, 0.13)   | 0.002     | 0.042 | 0.569 | -0.02 (-0.10, 0.06) |
| 10708_3   | GNRH2   | GNH2        | 226 | -0.017                    | 0.19  | 0.392    | -0.02 (0.02, 0.02) | 0.744           | 0.685    | -0.039        | 0.039  | 0.319      | -0.04 (0.11, 0.04)  | 0.001    | 0.510  | 0.009   | 0.035     | 0.787  | 0.01 (0.06, 0.08)   | 0.015     | 0.041 | 0.708 | 0.02 (0.06, 0.10)   |
| 11103_24  | HSPB1   | HSP 27      | 226 | 0.016                     | 0.19  | 0.393    | 0.02 (0.02, 0.05)  | 0.744           | 0.422    | 0.025         | 0.039  | 0.526      | 0.02 (0.05, 0.10)   | -0.001   | 0.804  | 0.001   | 0.032     | 0.862  | -0.70 (-0.04, 0.00) | 0.004     | 0.039 | 0.925 | 3.70 (-0.07, 0.08)  |
| 11405_150 | CARD9   | CARD9       | 226 | 0.016                     | 0.19  | 0.393    | 0.02 (0.02, 0.05)  | 0.744           | 0.049    | -0.066        | 0.041  | 0.111      | -0.07 (0.15, 0.01)  | 0.005    | 0.020  | 0.068   | 0.033     | 0.868  | 0.01 (0.06, 0.07)   | -0.007    | 0.045 | 0.845 | 0.02 (-0.10, 0.06)  |
| 11592_1   | ELAVL1  | ELAV1       | 226 | 0.016                     | 0.18  | 0.392    | 0.02 (0.02, 0.05)  | 0.744           | 0.999    | -0.003        | 0.037  | 0.941      | -2.76 (-0.08, 0.07) | 0.001    | 0.566  | -0.013  | 0.031     | 0.662  | -0.01 (0.07, 0.05)  | -0.027    | 0.040 | 0.505 | -0.03 (-0.10, 0.05) |
| 13405_61  | SPFNK2  | ISK2        | 226 | -0.016                    | 0.19  | 0.393    | -0.02 (0.02, 0.02) | 0.744           | 0.425    | 0.001         | 0.038  | 0.978      | 0.06 (0.07, 0.08)   | 0.000    | 0.606  | 0.010   | 0.040     | 0.796  | -0.01 (0.08, 0.07)  | -0.045    | 0.038 | 0.241 | -0.04 (-0.12, 0.03) |
| 13554_9   | CNPNK1  | CNPK1       | 226 | 0.015                     | 0.18  | 0.392    | 0.02 (0.02, 0.05)  | 0.744           | 0.877    | 0.010         | 0.037  | 0.793      | 0.01 (-0.08, 0.08)  | 0.000    | 0.864  | 0.000   | 0.039     | 0.977  | -0.87 (-0.04, 0.00) | -0.007    | 0.037 | 0.844 | -0.01 (0.08, 0.07)  |
| 17769_28  | PCNP    | PCNP        | 226 | 0.016                     | 0.18  | 0.392    | 0.02 (0.02, 0.05)  | 0.744           | 0.507    | 0.024         | 0.036  | 0.512      | -0.02 (0.05, 0.10)  | -0.001   | 0.797  | -0.032  | 0.032     | 0.320  | -0.03 (0.08, 0.03)  | -0.029    | 0.037 | 0.441 | -0.03 (-0.10, 0.04) |
| 18237_29  | NR3P    | NR3P        | 226 | -0.017                    | 0.19  | 0.392    | -0.02 (0.02, 0.02) | 0.744           | 0.444    | -0.003        | 0.039  | 0.944      | -2.76 (-0.08, 0.07) | 0.001    | 0.686  | 0.012   | 0.034     | 0.720  | 0.01 (0.05, 0.08)   | -0.016    | 0.038 | 0.671 | -0.02 (0.09, 0.06)  |
| 18392_19  | MAT2B   | MAT2B       | 226 | 0.016                     | 0.19  | 0.391    | 0.02 (0.02, 0.05)  | 0.744           | 0.901    | 0.025         | 0.042  | 0.562      | 0.03 (0.08, 0.11)   | 0.000    | 0.837  | 0.011   | 0.035     | 0.765  | -0.01 (0.08, 0.08)  | 0.002     | 0.040 | 0.642 | -0.03 (0.08, 0.08)  |
| 19190_4   | UBE2L6  | UBE2L6      | 226 | 0.016                     | 0.19  | 0.391    | 0.02 (0.02, 0.05)  | 0.744           | 0.884    | -0.002        | 0.038  | 0.953      | -2.22 (-0.08, 0.07) | 0.001    | 0.581  | 0.012   | 0.038     | 0.754  | 0.01 (0.06, 0.09)   | 0.026     | 0.038 | 0.472 | 0.03 (0.04, 0.10)   |
| 3392_68   | AKT3    | PKB alpha   | 226 | -0.016                    | 0.19  | 0.393    | -0.02 (0.02, 0.02) | 0.744           | 0.905    | -0.003        | 0.038  | 0.930      | -3.36 (-0.07, 0.08) | 0.000    | 0.455  | -0.029  | 0.032     | 0.377  | -0.03 (0.08, 0.03)  | -0.039    | 0.038 | 0.385 | -0.04 (-0.11, 0.04) |
| 3432_21   | EPHA3   | EPHA3       | 226 | -0.016                    | 0.19  | 0.393    | -0.02 (0.02, 0.02) | 0.744           | 0.452    | 0.021         | 0.039  | 0.944      | -2.22 (-0.08, 0.07) | 0.000    | 0.455  | -0.029  | 0.032     | 0.377  | -0.03 (0.08, 0.03)  | -0.039    | 0.038 | 0.385 | -0.04 (-0.11, 0.04) |
| 4481_34   | CAA     | CAA         | 226 | -0.017                    | 0.20  | 0.393    | -0.02 (0.02, 0.02) | 0.744           | 0.908    | -0.038        | 0.042  | 0.382      | -0.04 (0.12, 0.04)  | 0.001    | 0.555  | -0.019  | 0.035     | 0.580  | -0.02 (0.08, 0.05)  | -0.030    | 0.040 | 0.462 | -0.03 (-0.11, 0.05) |
| 5246_6    | PI3K2   | gPI3K       | 226 | -0.021                    | 0.20  | 0.391    | -0.02 (0.02, 0.02) | 0.744           | 0.955    | -0.058        | 0.039  | 0.162      | -0.06 (0.13, 0.02)  | 0.002    | 0.261  | -0.035  | 0.039     | 0.380  | -0.03 (0.11, 0.04)  | -0.047    | 0.048 | 0.222 | -0.06 (-0.12, 0.03) |
| 8440_31   | MFAP5   | MFAP5       | 226 | -0.016                    | 0.19  | 0.393    | 0.02 (0.02, 0.05)  | 0.744           | 0.903    | 0.041         | 0.039  | 0.944      | -2.22 (-0.08, 0.07) | 0.000    | 0.455  | -0.029  | 0.032     | 0.377  | -0.03 (0.08, 0.03)  | -0.039    | 0.038 | 0.385 | -0.04 (-0.11, 0.04) |
| 9754_33   | HDAC3   | HDAC3       | 226 | -0.017                    | 0.19  | 0.390    | -0.02 (0.02, 0.02) | 0.744           | 0.264    | -0.021        | 0.040  | 0.598      | -0.02 (0.10, 0.06)  | 0.000    | 0.896  | 0.000   | 0.041     | 0.995  | 2.39 (0.04, 0.00)   | 0.000     | 0.041 | 0.887 | -0.01 (0.07, 0.09)  |
| 11669_39  | SLOC5A1 | SOSA1       | 226 | -0.016                    | 0.19  | 0.393    | 0.02 (0.02, 0.02)  | 0.744           | 0.672    | 0.000         | 0.038  | 0.999      | 3.06 (0.05, 0.08)   | 0.001    | 0.625  | 0.011   | 0.033     | 0.743  | 0.01 (0.05, 0.08)   | 0.018     | 0.041 | 0.674 | 0.02 (0.06, 0.10)   |
| 11669_39  | MAPK11  | MK11        | 226 | 0.018                     | 0.22  | 0.393    | 0.02 (0.02, 0.06)  | 0.744           | 0.006    | 0.065         | 0.043  | 0.135      | 0.07 (0.02, 0.15)   | -0.003   | 0.217  | 0.074   | 0.037     | 0.048  | 0.07 (0.39, 0.04)   | 0.117     | 0.074 | 0.042 | 0.01 (0.27, 0.03)   |
| 10539_30  | CD92E   | CD92E       | 226 | -0.017                    | 0.19  | 0.392    | -0.02 (0.02, 0.02) | 0.744           | 0.207    | -0.007        | 0.039  | 0.687      | -0.01 (0.07, 0.08)  | 0.000    | 0.606  | 0.010   | 0.040     | 0.796  | -0.01 (0.08, 0.07)  | -0.045    | 0.038 | 0.241 | -0.04 (-0.12, 0.03) |
| 14005_2   | CHD7    | CHD7        | 226 | -0.019                    | 0.22  | 0.394    | -0.02 (0.02, 0.02) | 0.744           | 0.004    | -0.034        | 0.044  | 0.444      | -0.03 (0.12, 0.05)  | 0.001    | 0.623  | -0.058  | 0.039     | 0.137  | -0.06 (0.13, 0.02)  | -0.033    | 0.042 | 0.228 | -0.05 (-0.13, 0.03) |
| 14100_63  | C10C    | C10C        | 226 | -0.016                    | 0.19  | 0.394    | -0.02 (0.02, 0.02) | 0.744           | 0.440    | 0.011         | 0.039  | 0.783      | 0.01 (0.07, 0.09)   | -0.002   | 0.423  | -0.045  | 0.038     | 0.236  | -0.05 (0.12, 0.03)  | -0.035    | 0.043 | 0.419 | -0.03 (-0.12, 0.05) |
| 16588_10  | HSP9A   | HSP9A       | 226 | 0.016                     | 0.19  | 0.392    | 0.02 (0.02, 0.05)  | 0.744           | 0.262    | -0.068        | 0.040  | 0.189      | -0.07 (0.15, 0.01)  | 0.004    | 0.423  | -0.045  | 0.038     | 0.236  | -0.05 (0.12, 0.03)  | -0.035    | 0.043 | 0.419 | -0.03 (-0.12, 0.05) |
| 3505_5    | LA1     | Lymphotixin | 226 | -0.018                    | 0.19  | 0.393    | -0.02 (0.02, 0.02) | 0.744           | 0.038    | -0.017        | 0.038  | 0.647      | -0.02 (0.09, 0.09)  | 0.000    | 0.968  | -0.039  | 0.037     | 0.282  | -0.04 (0.11, 0.03)  | -0.039    | 0.038 | 0.307 | -0.04 (-0.11, 0.04) |
| 8357_83   | CEL3A   | ELAB3       | 226 | 0.017                     | 0.19  | 0.394    | 0.02 (0.02, 0.05)  | 0.744           | 0.808    | 0.018         | 0.039  | 0.643      | 0.02 (0.06, 0.09)   | 0.000    | 0.968  | -0.039  | 0.037     | 0.282  | -0.04 (0.11, 0.03)  | -0.039    | 0.038 | 0.307 | -0.04 (-0.11, 0.04) |
| 7790_21   | LF      | LF          | 226 | 0.015                     | 0.18  | 0.392    | 0.02 (0.02, 0.05)  | 0.744           | 0.910    | 0.012         | 0.039  | 0.823      | 0.07 (0.05, 0.15)   | 0.000    | 0.972  | 0.009   | 0.039     | 0.847  | 0.03 (0.04, 0.11)   | 0.012     | 0.040 | 0.844 | 0.03 (0.05, 0.13)   |



Table S5. Association of type 2 diabetes with Ferland plasma protein.

| SomaLogicGene    | Protein     | rsnp | b/w    |       | pval/w |                    | CI/w    |       | MR Egger |       | Weighted median |                    | Weighted mode |       |       |                    |                    |                      |
|------------------|-------------|------|--------|-------|--------|--------------------|---------|-------|----------|-------|-----------------|--------------------|---------------|-------|-------|--------------------|--------------------|----------------------|
|                  |             |      | beta   | se    | pval   | ci_low             | ci_high | beta  | se       | beta  | se              | beta               | se            |       |       |                    |                    |                      |
| 17384_10_HFKM    | KFPF        | 226  | -0.013 | 0.018 | 0.471  | -0.02 (0.02, 0.05) | 0.792   | 0.005 | -0.025   | 0.038 | 0.121           | -0.02 (0.10, 0.05) | 0.010         | 0.037 | 0.779 | -0.01 (0.08, 0.06) |                    |                      |
| 11342_58_FLDC2   | FLDC2       | 226  | -0.013 | 0.018 | 0.471  | -0.02 (0.02, 0.05) | 0.792   | 0.005 | -0.025   | 0.038 | 0.121           | -0.02 (0.10, 0.05) | 0.010         | 0.037 | 0.779 | -0.01 (0.08, 0.06) |                    |                      |
| 15455_40_ADM15   | ADM15       | 226  | -0.014 | 0.019 | 0.472  | -0.01 (0.05, 0.02) | 0.793   | 0.007 | 0.031    | 0.042 | 0.454           | 0.03 (0.05, 0.11)  | -0.003        | 0.213 | 0.030 | 0.903              | 0.31 (0.07, 0.07)  |                      |
| 11400_25_TEN3    | TEN3        | 226  | -0.014 | 0.020 | 0.472  | -0.01 (0.05, 0.02) | 0.793   | 0.009 | -0.030   | 0.049 | 0.454           | -0.03 (0.11, 0.05) | -0.001        | 0.651 | 0.022 | 0.909              | 0.67 (-0.02, 0.07) |                      |
| 5762_35_SPAH1B   | SPAH1B      | 226  | -0.015 | 0.020 | 0.472  | -0.01 (0.05, 0.02) | 0.793   | 0.007 | 0.031    | 0.042 | 0.454           | 0.03 (0.05, 0.11)  | -0.003        | 0.213 | 0.030 | 0.903              | 0.31 (0.07, 0.07)  |                      |
| 6439_9_CPLZ      | CPLZ        | 226  | -0.014 | 0.019 | 0.472  | -0.01 (0.05, 0.02) | 0.793   | 0.008 | -0.060   | 0.042 | 0.152           | -0.06 (0.14, 0.02) | -0.003        | 0.200 | 0.090 | 0.034              | 0.009              | -0.09 (-0.16, -0.02) |
| 7193_14_SFRZ     | SFRZ        | 226  | -0.014 | 0.019 | 0.472  | -0.01 (0.05, 0.02) | 0.793   | 0.013 | 0.035    | 0.038 | 0.357           | 0.03 (0.04, 0.11)  | -0.003        | 0.142 | 0.107 | 0.032              | 0.599              | 0.02 (-0.05, 0.08)   |
| 8692_10_STEAS3   | STEAS3      | 226  | -0.014 | 0.019 | 0.472  | -0.01 (0.05, 0.02) | 0.793   | 0.013 | 0.035    | 0.038 | 0.357           | 0.03 (0.04, 0.11)  | -0.003        | 0.142 | 0.107 | 0.032              | 0.599              | 0.02 (-0.05, 0.08)   |
| 10001_7_VRF1     | c-Raf       | 226  | -0.013 | 0.018 | 0.474  | -0.01 (0.05, 0.02) | 0.793   | 0.014 | 0.035    | 0.038 | 0.357           | 0.03 (0.04, 0.11)  | -0.003        | 0.142 | 0.107 | 0.032              | 0.599              | 0.02 (-0.05, 0.08)   |
| 11176_21_SAF1    | SVEP1       | 226  | -0.016 | 0.022 | 0.473  | -0.02 (0.05, 0.02) | 0.793   | 0.014 | -0.022   | 0.044 | 0.614           | -0.02 (0.11, 0.05) | -0.003        | 0.983 | 0.040 | 0.036              | 0.920              | -3.66 (0.03, 0.07)   |
| 11881_8_AGR1     | NURF        | 226  | -0.016 | 0.022 | 0.473  | -0.02 (0.05, 0.02) | 0.793   | 0.014 | -0.022   | 0.044 | 0.614           | -0.02 (0.11, 0.05) | -0.003        | 0.983 | 0.040 | 0.036              | 0.920              | -3.66 (0.03, 0.07)   |
| 12540_25_RHRG    | RHOG        | 226  | -0.013 | 0.018 | 0.474  | -0.01 (0.05, 0.02) | 0.793   | 0.013 | -0.030   | 0.038 | 0.428           | -0.03 (0.10, 0.04) | -0.003        | 0.191 | 0.133 | 0.032              | 0.694              | -0.01 (-0.08, 0.05)  |
| 18163_3_LDRAP1   | ARH1        | 226  | -0.013 | 0.019 | 0.473  | -0.01 (0.05, 0.02) | 0.793   | 0.013 | -0.030   | 0.038 | 0.428           | -0.03 (0.10, 0.04) | -0.003        | 0.191 | 0.133 | 0.032              | 0.694              | -0.01 (-0.08, 0.05)  |
| 8701_81_CLEC3B   | Tetraspanin | 226  | -0.013 | 0.019 | 0.473  | -0.01 (0.05, 0.02) | 0.793   | 0.013 | -0.030   | 0.038 | 0.428           | -0.03 (0.10, 0.04) | -0.003        | 0.191 | 0.133 | 0.032              | 0.694              | -0.01 (-0.08, 0.05)  |
| 5731_1_SPNK6     | SKG         | 226  | -0.015 | 0.021 | 0.474  | -0.02 (0.05, 0.02) | 0.793   | 0.013 | -0.030   | 0.038 | 0.428           | -0.03 (0.10, 0.04) | -0.003        | 0.191 | 0.133 | 0.032              | 0.694              | -0.01 (-0.08, 0.05)  |
| 9773_21_PGG1     | PGM1        | 226  | -0.015 | 0.021 | 0.474  | -0.02 (0.05, 0.02) | 0.793   | 0.013 | -0.030   | 0.038 | 0.428           | -0.03 (0.10, 0.04) | -0.003        | 0.191 | 0.133 | 0.032              | 0.694              | -0.01 (-0.08, 0.05)  |
| 1648_9_MYBPC1    | MYBPC1      | 226  | -0.015 | 0.021 | 0.474  | -0.02 (0.05, 0.02) | 0.793   | 0.013 | -0.030   | 0.038 | 0.428           | -0.03 (0.10, 0.04) | -0.003        | 0.191 | 0.133 | 0.032              | 0.694              | -0.01 (-0.08, 0.05)  |
| 8556_5_ENPP5     | ENPP5       | 226  | -0.014 | 0.020 | 0.474  | -0.01 (0.05, 0.02) | 0.793   | 0.013 | -0.030   | 0.038 | 0.428           | -0.03 (0.10, 0.04) | -0.003        | 0.191 | 0.133 | 0.032              | 0.694              | -0.01 (-0.08, 0.05)  |
| 2614_28_EFNAA    | Efnv4a1b    | 226  | -0.013 | 0.018 | 0.475  | -0.01 (0.05, 0.02) | 0.793   | 0.013 | -0.030   | 0.038 | 0.428           | -0.03 (0.10, 0.04) | -0.003        | 0.191 | 0.133 | 0.032              | 0.694              | -0.01 (-0.08, 0.05)  |
| 3148_49_CXCL2    | Cxcl2       | 226  | -0.014 | 0.020 | 0.475  | -0.01 (0.05, 0.02) | 0.793   | 0.013 | -0.030   | 0.038 | 0.428           | -0.03 (0.10, 0.04) | -0.003        | 0.191 | 0.133 | 0.032              | 0.694              | -0.01 (-0.08, 0.05)  |
| 3285_23_C1R      | C1r         | 226  | -0.015 | 0.021 | 0.475  | -0.02 (0.05, 0.02) | 0.794   | 0.014 | -0.008   | 0.043 | 0.858           | -0.01 (0.09, 0.08) | -0.003        | 0.843 | 0.022 | 0.442              | 0.597              | -0.02 (-0.10, 0.06)  |
| 10452_2_AGA      | AGA         | 226  | -0.013 | 0.018 | 0.475  | -0.01 (0.05, 0.02) | 0.794   | 0.013 | -0.030   | 0.038 | 0.428           | -0.03 (0.10, 0.04) | -0.003        | 0.191 | 0.133 | 0.032              | 0.694              | -0.01 (-0.08, 0.05)  |
| 12692_56_DOT1L   | DOT1L       | 226  | -0.014 | 0.020 | 0.476  | -0.01 (0.05, 0.02) | 0.795   | 0.014 | -0.008   | 0.043 | 0.858           | -0.01 (0.09, 0.08) | -0.003        | 0.843 | 0.022 | 0.442              | 0.597              | -0.02 (-0.10, 0.06)  |
| 11187_11_CLEC2A  | CL2A        | 226  | -0.014 | 0.019 | 0.477  | -0.01 (0.05, 0.02) | 0.795   | 0.013 | -0.001   | 0.039 | 0.989           | 0.28 (-0.04, 0.08) | -0.001        | 0.667 | 0.007 | 0.441              | 0.857              | -0.01 (-0.08, 0.07)  |
| 13392_12_NSF     | NSF         | 226  | -0.014 | 0.019 | 0.477  | -0.01 (0.05, 0.02) | 0.795   | 0.013 | -0.001   | 0.039 | 0.989           | 0.28 (-0.04, 0.08) | -0.001        | 0.667 | 0.007 | 0.441              | 0.857              | -0.01 (-0.08, 0.07)  |
| 8807_13_SNK1     | SNK1        | 226  | -0.014 | 0.019 | 0.477  | -0.01 (0.05, 0.02) | 0.795   | 0.013 | -0.001   | 0.039 | 0.989           | 0.28 (-0.04, 0.08) | -0.001        | 0.667 | 0.007 | 0.441              | 0.857              | -0.01 (-0.08, 0.07)  |
| 3291_30_FICER2   | CD33        | 226  | -0.015 | 0.022 | 0.477  | -0.02 (0.05, 0.03) | 0.795   | 0.009 | -0.050   | 0.044 | 0.251           | -0.05 (0.14, 0.04) | -0.002        | 0.358 | 0.029 | 0.441              | 0.479              | -0.03 (-0.11, 0.05)  |
| 10754_113_PRR20  | PRR20       | 226  | -0.015 | 0.022 | 0.477  | -0.02 (0.05, 0.03) | 0.795   | 0.009 | -0.050   | 0.044 | 0.251           | -0.05 (0.14, 0.04) | -0.002        | 0.358 | 0.029 | 0.441              | 0.479              | -0.03 (-0.11, 0.05)  |
| 11196_31_COL6A3  | Collagen a3 | 226  | -0.015 | 0.022 | 0.481  | -0.02 (0.05, 0.03) | 0.795   | 0.011 | -0.073   | 0.044 | 0.094           | -0.07 (0.16, 0.01) | -0.004        | 0.127 | 0.024 | 0.441              | 0.553              | -0.02 (-0.10, 0.06)  |
| 12641_3_INPBP8   | RPE2        | 226  | -0.013 | 0.018 | 0.481  | -0.01 (0.05, 0.02) | 0.795   | 0.011 | -0.073   | 0.044 | 0.094           | -0.07 (0.16, 0.01) | -0.004        | 0.127 | 0.024 | 0.441              | 0.553              | -0.02 (-0.10, 0.06)  |
| 12713_36R6R19    | R6R19       | 226  | -0.013 | 0.018 | 0.481  | -0.01 (0.05, 0.02) | 0.795   | 0.011 | -0.073   | 0.044 | 0.094           | -0.07 (0.16, 0.01) | -0.004        | 0.127 | 0.024 | 0.441              | 0.553              | -0.02 (-0.10, 0.06)  |
| 12735_39_CSD2E1  | CSD2E1      | 226  | -0.013 | 0.018 | 0.482  | -0.01 (0.05, 0.02) | 0.795   | 0.011 | -0.073   | 0.044 | 0.094           | -0.07 (0.16, 0.01) | -0.004        | 0.127 | 0.024 | 0.441              | 0.553              | -0.02 (-0.10, 0.06)  |
| 13671_40_ELANE   | Elastase    | 226  | -0.014 | 0.019 | 0.481  | -0.01 (0.05, 0.02) | 0.795   | 0.011 | -0.073   | 0.044 | 0.094           | -0.07 (0.16, 0.01) | -0.004        | 0.127 | 0.024 | 0.441              | 0.553              | -0.02 (-0.10, 0.06)  |
| 13726_19_ERP29   | ERP29       | 226  | -0.014 | 0.019 | 0.481  | -0.01 (0.05, 0.02) | 0.795   | 0.011 | -0.073   | 0.044 | 0.094           | -0.07 (0.16, 0.01) | -0.004        | 0.127 | 0.024 | 0.441              | 0.553              | -0.02 (-0.10, 0.06)  |
| 14021_81_MED4    | MED4        | 226  | -0.014 | 0.020 | 0.479  | -0.01 (0.05, 0.02) | 0.795   | 0.014 | -0.004   | 0.039 | 0.921           | 3.96 (-0.07, 0.08) | -0.001        | 0.604 | 0.017 | 0.039              | 0.672              | -0.02 (-0.08, 0.06)  |
| 14037_6_EB56     | EB56        | 226  | -0.014 | 0.020 | 0.479  | -0.01 (0.05, 0.02) | 0.795   | 0.014 | -0.004   | 0.039 | 0.921           | 3.96 (-0.07, 0.08) | -0.001        | 0.604 | 0.017 | 0.039              | 0.672              | -0.02 (-0.08, 0.06)  |
| 14324_56_SMC3    | CSPG6       | 226  | -0.014 | 0.020 | 0.479  | -0.01 (0.05, 0.02) | 0.795   | 0.014 | -0.004   | 0.039 | 0.921           | 3.96 (-0.07, 0.08) | -0.001        | 0.604 | 0.017 | 0.039              | 0.672              | -0.02 (-0.08, 0.06)  |
| 16394_6_LGR4     | LGR4        | 226  | -0.014 | 0.019 | 0.480  | -0.01 (0.05, 0.02) | 0.795   | 0.011 | -0.002   | 0.039 | 0.920           | 0.02 (0.10, 0.06)  | -0.003        | 0.933 | 0.027 | 0.034              | 0.431              | -0.03 (-0.09, 0.04)  |
| 16110_3_GDI1     | GDI1        | 226  | -0.013 | 0.018 | 0.479  | -0.01 (0.05, 0.02) | 0.795   | 0.011 | -0.002   | 0.039 | 0.920           | 0.02 (0.10, 0.06)  | -0.003        | 0.933 | 0.027 | 0.034              | 0.431              | -0.03 (-0.09, 0.04)  |
| 16865_02_TAF15   | RBPV56      | 226  | -0.013 | 0.018 | 0.478  | -0.01 (0.05, 0.02) | 0.795   | 0.011 | -0.002   | 0.039 | 0.920           | 0.02 (0.10, 0.06)  | -0.003        | 0.933 | 0.027 | 0.034              | 0.431              | -0.03 (-0.09, 0.04)  |
| 18174_79_PDCD8P1 | PDCD8       | 226  | -0.012 | 0.017 | 0.481  | -0.01 (0.05, 0.02) | 0.795   | 0.011 | -0.002   | 0.039 | 0.920           | 0.02 (0.10, 0.06)  | -0.003        | 0.933 | 0.027 | 0.034              | 0.431              | -0.03 (-0.09, 0.04)  |
| 18262_219_ACAD11 | ACAD11      | 226  | -0.013 | 0.019 | 0.479  | -0.01 (0.05, 0.02) | 0.795   | 0.011 | -0.002   | 0.039 | 0.920           | 0.02 (0.10, 0.06)  | -0.003        | 0.933 | 0.027 | 0.034              | 0.431              | -0.03 (-0.09, 0.04)  |
| 2966_55_L1ER1A   | SCGF-beta   | 226  | -0.015 | 0.021 | 0.481  | -0.01 (0.05, 0.02) | 0.795   | 0.011 | -0.002   | 0.039 | 0.920           | 0.02 (0.10, 0.06)  | -0.003        | 0.933 | 0.027 | 0.034              | 0.431              | -0.03 (-0.09, 0.04)  |
| 2993_1_CLEP1     | L1R-Br      | 226  | -0.013 | 0.019 | 0.482  | -0.01 (0.05, 0.02) | 0.795   | 0.011 | -0.002   | 0.039 | 0.920           | 0.02 (0.10, 0.06)  | -0.003        | 0.933 | 0.027 | 0.034              | 0.431              | -0.03 (-0.09, 0.04)  |
| 3067_07_CDFP     | CDFP        | 226  | -0.013 | 0.019 | 0.482  | -0.01 (0.05, 0.02) | 0.795   | 0.011 | -0.002   | 0.039 | 0.920           | 0.02 (0.10, 0.06)  | -0.003        | 0.933 | 0.027 | 0.034              | 0.431              | -0.03 (-0.09, 0.04)  |
| 3647_49_TLR4     | TLR4-AM2-2  | 226  | -0.015 | 0.021 | 0.480  | -0.01 (0.05, 0.02) | 0.795   | 0.011 | -0.002   | 0.039 | 0.920           | 0.02 (0.10, 0.06)  | -0.003        | 0.933 | 0.027 | 0.034              | 0.431              | -0.03 (-0.09, 0.04)  |
| 5067_5_L2R2A     | L2R2P       | 226  | -0.014 | 0.020 | 0.481  | -0.01 (0.05, 0.02) | 0.795   | 0.011 | -0.002   | 0.039 | 0.920           | 0.02 (0.10, 0.06)  | -0.003        | 0.933 | 0.027 | 0.034              | 0.431              | -0.03 (-0.09, 0.04)  |
| 6562_13_VASN     | VASN        | 226  | -0.014 | 0.020 | 0.481  | -0.01 (0.05, 0.02) | 0.795   | 0.011 | -0.002   | 0.039 | 0.920           | 0.02 (0.10, 0.06)  | -0.003        | 0.933 | 0.027 | 0.034              | 0.431              | -0.03 (-0.09, 0.04)  |
| 6739_75_KRTAP4   | KTAP4       | 226  | -0.014 | 0.020 | 0.481  | -0.01 (0.05, 0.02) | 0.795   | 0.011 | -0.002   | 0.039 | 0.920           | 0.02 (0.10, 0.06)  | -0.003        | 0.933 | 0.027 | 0.034              | 0.431              | -0.03 (-0.09, 0.04)  |
| 7148_42_MLXN1    |             |      |        |       |        |                    |         |       |          |       |                 |                    |               |       |       |                    |                    |                      |

Table S5. Association of type 2 diabetes with Finland plasma protein.

| Accession | Protein  | rnp       | Inverse variance weighted |       | MR Egger |       | Weighted median |       | Weighted mode |          |            |          |       |       |           |             |        |         |           |         |       |       |
|-----------|----------|-----------|---------------------------|-------|----------|-------|-----------------|-------|---------------|----------|------------|----------|-------|-------|-----------|-------------|--------|---------|-----------|---------|-------|-------|
|           |          |           | b/w                       | se/w  | pval/iv  | CI/w  | FOR_ZW          | Q1    | b/egger       | se/egger | pval/egger | CI/egger | egger | inter | se/median | pval/median | b/mode | se/mode | pval/mode | CI/mode |       |       |
| 14074_2   | SH2C     | SH2C      | 0.23                      | 0.020 | 0.518    | 0.017 | 0.035           | 0.815 | 0.662         | 0.16     | 0.039      | 0.022    | -0.06 | 0.09  | 0.924     | 0.004       | 0.339  | 0.917   | -4.55e-03 | 0.008   | 0.014 | 0.037 |
| 14519_8   | ZNF252   | ZNF252    | 0.23                      | 0.012 | 0.518    | 0.017 | 0.035           | 0.815 | 0.662         | 0.16     | 0.039      | 0.022    | -0.06 | 0.09  | 0.924     | 0.004       | 0.339  | 0.917   | -4.55e-03 | 0.008   | 0.014 | 0.037 |
| 16046_12  | GRAP2    | GRAP2     | 0.23                      | 0.012 | 0.518    | 0.017 | 0.035           | 0.815 | 0.662         | 0.16     | 0.039      | 0.022    | -0.06 | 0.09  | 0.924     | 0.004       | 0.339  | 0.917   | -4.55e-03 | 0.008   | 0.014 | 0.037 |
| 2874_24   | RPS27A   | Ubltin1   | 0.23                      | 0.012 | 0.518    | 0.017 | 0.035           | 0.815 | 0.662         | 0.16     | 0.039      | 0.022    | -0.06 | 0.09  | 0.924     | 0.004       | 0.339  | 0.917   | -4.55e-03 | 0.008   | 0.014 | 0.037 |
| 3321_2    | SLA      | SLA       | 0.23                      | 0.012 | 0.518    | 0.017 | 0.035           | 0.815 | 0.662         | 0.16     | 0.039      | 0.022    | -0.06 | 0.09  | 0.924     | 0.004       | 0.339  | 0.917   | -4.55e-03 | 0.008   | 0.014 | 0.037 |
| 3342_76   | ABL2     | ABL2      | 0.23                      | 0.012 | 0.518    | 0.017 | 0.035           | 0.815 | 0.662         | 0.16     | 0.039      | 0.022    | -0.06 | 0.09  | 0.924     | 0.004       | 0.339  | 0.917   | -4.55e-03 | 0.008   | 0.014 | 0.037 |
| 3381_24   | LYN      | LYN       | 0.23                      | 0.012 | 0.518    | 0.017 | 0.035           | 0.815 | 0.662         | 0.16     | 0.039      | 0.022    | -0.06 | 0.09  | 0.924     | 0.004       | 0.339  | 0.917   | -4.55e-03 | 0.008   | 0.014 | 0.037 |
| 4430_44   | COL1E1   | Col1e1    | 0.23                      | 0.012 | 0.518    | 0.017 | 0.035           | 0.815 | 0.662         | 0.16     | 0.039      | 0.022    | -0.06 | 0.09  | 0.924     | 0.004       | 0.339  | 0.917   | -4.55e-03 | 0.008   | 0.014 | 0.037 |
| 5230_99   | HMGCR    | HMGCR     | 0.23                      | 0.012 | 0.518    | 0.017 | 0.035           | 0.815 | 0.662         | 0.16     | 0.039      | 0.022    | -0.06 | 0.09  | 0.924     | 0.004       | 0.339  | 0.917   | -4.55e-03 | 0.008   | 0.014 | 0.037 |
| 5467_15   | HSP90AB1 | HSP90     | 0.23                      | 0.012 | 0.518    | 0.017 | 0.035           | 0.815 | 0.662         | 0.16     | 0.039      | 0.022    | -0.06 | 0.09  | 0.924     | 0.004       | 0.339  | 0.917   | -4.55e-03 | 0.008   | 0.014 | 0.037 |
| 7695_108  | MRAP     | MRAP      | 0.23                      | 0.012 | 0.518    | 0.017 | 0.035           | 0.815 | 0.662         | 0.16     | 0.039      | 0.022    | -0.06 | 0.09  | 0.924     | 0.004       | 0.339  | 0.917   | -4.55e-03 | 0.008   | 0.014 | 0.037 |
| 8378_3    | LDC1     | LDC1      | 0.23                      | 0.012 | 0.518    | 0.017 | 0.035           | 0.815 | 0.662         | 0.16     | 0.039      | 0.022    | -0.06 | 0.09  | 0.924     | 0.004       | 0.339  | 0.917   | -4.55e-03 | 0.008   | 0.014 | 0.037 |
| 8426_102  | NMI      | NMI       | 0.23                      | 0.012 | 0.518    | 0.017 | 0.035           | 0.815 | 0.662         | 0.16     | 0.039      | 0.022    | -0.06 | 0.09  | 0.924     | 0.004       | 0.339  | 0.917   | -4.55e-03 | 0.008   | 0.014 | 0.037 |
| 8450_36   | ACYP1    | PCAP3P    | 0.23                      | 0.012 | 0.518    | 0.017 | 0.035           | 0.815 | 0.662         | 0.16     | 0.039      | 0.022    | -0.06 | 0.09  | 0.924     | 0.004       | 0.339  | 0.917   | -4.55e-03 | 0.008   | 0.014 | 0.037 |
| 8649_13   | APEX1    | APEX1     | 0.23                      | 0.012 | 0.518    | 0.017 | 0.035           | 0.815 | 0.662         | 0.16     | 0.039      | 0.022    | -0.06 | 0.09  | 0.924     | 0.004       | 0.339  | 0.917   | -4.55e-03 | 0.008   | 0.014 | 0.037 |
| 8673_75   | ESRRB    | Erbp1     | 0.23                      | 0.012 | 0.518    | 0.017 | 0.035           | 0.815 | 0.662         | 0.16     | 0.039      | 0.022    | -0.06 | 0.09  | 0.924     | 0.004       | 0.339  | 0.917   | -4.55e-03 | 0.008   | 0.014 | 0.037 |
| 8684_70   | PCDH8    | PCDH8     | 0.23                      | 0.012 | 0.518    | 0.017 | 0.035           | 0.815 | 0.662         | 0.16     | 0.039      | 0.022    | -0.06 | 0.09  | 0.924     | 0.004       | 0.339  | 0.917   | -4.55e-03 | 0.008   | 0.014 | 0.037 |
| 8951_36   | FXR1     | FXR1      | 0.23                      | 0.012 | 0.518    | 0.017 | 0.035           | 0.815 | 0.662         | 0.16     | 0.039      | 0.022    | -0.06 | 0.09  | 0.924     | 0.004       | 0.339  | 0.917   | -4.55e-03 | 0.008   | 0.014 | 0.037 |
| 9203_25   | RFXC     | RFXC      | 0.23                      | 0.012 | 0.518    | 0.017 | 0.035           | 0.815 | 0.662         | 0.16     | 0.039      | 0.022    | -0.06 | 0.09  | 0.924     | 0.004       | 0.339  | 0.917   | -4.55e-03 | 0.008   | 0.014 | 0.037 |
| 9703_74   | MATN4    | MATN4     | 0.23                      | 0.012 | 0.518    | 0.017 | 0.035           | 0.815 | 0.662         | 0.16     | 0.039      | 0.022    | -0.06 | 0.09  | 0.924     | 0.004       | 0.339  | 0.917   | -4.55e-03 | 0.008   | 0.014 | 0.037 |
| 9711_40   | JPH4     | JPH4      | 0.23                      | 0.012 | 0.518    | 0.017 | 0.035           | 0.815 | 0.662         | 0.16     | 0.039      | 0.022    | -0.06 | 0.09  | 0.924     | 0.004       | 0.339  | 0.917   | -4.55e-03 | 0.008   | 0.014 | 0.037 |
| 9823_2    | FBP2     | FBP2      | 0.23                      | 0.012 | 0.518    | 0.017 | 0.035           | 0.815 | 0.662         | 0.16     | 0.039      | 0.022    | -0.06 | 0.09  | 0.924     | 0.004       | 0.339  | 0.917   | -4.55e-03 | 0.008   | 0.014 | 0.037 |
| 19150_20  | PRPS2P   | KPR2      | 0.23                      | 0.012 | 0.518    | 0.017 | 0.035           | 0.815 | 0.662         | 0.16     | 0.039      | 0.022    | -0.06 | 0.09  | 0.924     | 0.004       | 0.339  | 0.917   | -4.55e-03 | 0.008   | 0.014 | 0.037 |
| 13790_43  | HDLBP    | VIGLN     | 0.23                      | 0.012 | 0.518    | 0.017 | 0.035           | 0.815 | 0.662         | 0.16     | 0.039      | 0.022    | -0.06 | 0.09  | 0.924     | 0.004       | 0.339  | 0.917   | -4.55e-03 | 0.008   | 0.014 | 0.037 |
| 13240_170 | SHANK1   | SHANK1    | 0.23                      | 0.012 | 0.518    | 0.017 | 0.035           | 0.815 | 0.662         | 0.16     | 0.039      | 0.022    | -0.06 | 0.09  | 0.924     | 0.004       | 0.339  | 0.917   | -4.55e-03 | 0.008   | 0.014 | 0.037 |
| 2796_52   | FGA      | Fibrogene | 0.23                      | 0.012 | 0.518    | 0.017 | 0.035           | 0.815 | 0.662         | 0.16     | 0.039      | 0.022    | -0.06 | 0.09  | 0.924     | 0.004       | 0.339  | 0.917   | -4.55e-03 | 0.008   | 0.014 | 0.037 |
| 9628_98   | LDC1     | LDC1      | 0.23                      | 0.012 | 0.518    | 0.017 | 0.035           | 0.815 | 0.662         | 0.16     | 0.039      | 0.022    | -0.06 | 0.09  | 0.924     | 0.004       | 0.339  | 0.917   | -4.55e-03 | 0.008   | 0.014 | 0.037 |
| 11571_75  | KLRK1    | KLRK2     | 0.23                      | 0.012 | 0.518    | 0.017 | 0.035           | 0.815 | 0.662         | 0.16     | 0.039      | 0.022    | -0.06 | 0.09  | 0.924     | 0.004       | 0.339  | 0.917   | -4.55e-03 | 0.008   | 0.014 | 0.037 |
| 7038_45   | STR3A4   | SIAD      | 0.23                      | 0.012 | 0.518    | 0.017 | 0.035           | 0.815 | 0.662         | 0.16     | 0.039      | 0.022    | -0.06 | 0.09  | 0.924     | 0.004       | 0.339  | 0.917   | -4.55e-03 | 0.008   | 0.014 | 0.037 |
| 11273_176 | IGTST2B  | GSTT2     | 0.23                      | 0.012 | 0.518    | 0.017 | 0.035           | 0.815 | 0.662         | 0.16     | 0.039      | 0.022    | -0.06 | 0.09  | 0.924     | 0.004       | 0.339  | 0.917   | -4.55e-03 | 0.008   | 0.014 | 0.037 |
| 11470_9   | RELB     | RELB      | 0.23                      | 0.012 | 0.518    | 0.017 | 0.035           | 0.815 | 0.662         | 0.16     | 0.039      | 0.022    | -0.06 | 0.09  | 0.924     | 0.004       | 0.339  | 0.917   | -4.55e-03 | 0.008   | 0.014 | 0.037 |
| 11550_94  | BCAP29   | BAP29     | 0.23                      | 0.012 | 0.518    | 0.017 | 0.035           | 0.815 | 0.662         | 0.16     | 0.039      | 0.022    | -0.06 | 0.09  | 0.924     | 0.004       | 0.339  | 0.917   | -4.55e-03 | 0.008   | 0.014 | 0.037 |
| 16247_7   | PN1      | PN1       | 0.23                      | 0.012 | 0.518    | 0.017 | 0.035           | 0.815 | 0.662         | 0.16     | 0.039      | 0.022    | -0.06 | 0.09  | 0.924     | 0.004       | 0.339  | 0.917   | -4.55e-03 | 0.008   | 0.014 | 0.037 |
| 19135_5   | NLSCL    | CYBB      | 0.23                      | 0.012 | 0.518    | 0.017 | 0.035           | 0.815 | 0.662         | 0.16     | 0.039      | 0.022    | -0.06 | 0.09  | 0.924     | 0.004       | 0.339  | 0.917   | -4.55e-03 | 0.008   | 0.014 | 0.037 |
| 8247_9    | SIRPB1   | SIRPB1    | 0.23                      | 0.012 | 0.518    | 0.017 | 0.035           | 0.815 | 0.662         | 0.16     | 0.039      | 0.022    | -0.06 | 0.09  | 0.924     | 0.004       | 0.339  | 0.917   | -4.55e-03 | 0.008   | 0.014 | 0.037 |
| 8535_102  | NTSCL    | NTSCL     | 0.23                      | 0.012 | 0.518    | 0.017 | 0.035           | 0.815 | 0.662         | 0.16     | 0.039      | 0.022    | -0.06 | 0.09  | 0.924     | 0.004       | 0.339  | 0.917   | -4.55e-03 | 0.008   | 0.014 | 0.037 |
| 8536_102  | DNMKN    | Dermokine | 0.23                      | 0.012 | 0.518    | 0.017 | 0.035           | 0.815 | 0.662         | 0.16     | 0.039      | 0.022    | -0.06 | 0.09  | 0.924     | 0.004       | 0.339  | 0.917   | -4.55e-03 | 0.008   | 0.014 | 0.037 |
| 9802_27   | PLML2    | PLML2     | 0.23                      | 0.012 | 0.518    | 0.017 | 0.035           | 0.815 | 0.662         | 0.16     | 0.039      | 0.022    | -0.06 | 0.09  | 0.924     | 0.004       | 0.339  | 0.917   | -4.55e-03 | 0.008   | 0.014 | 0.037 |
| 15335_118 | FABP2    | FABP2     | 0.23                      | 0.012 | 0.518    | 0.017 | 0.035           | 0.815 | 0.662         | 0.16     | 0.039      | 0.022    | -0.06 | 0.09  | 0.924     | 0.004       | 0.339  | 0.917   | -4.55e-03 | 0.008   | 0.014 | 0.037 |
| 16090_99  | NID2     | NID2      | 0.23                      | 0.012 | 0.518    | 0.017 | 0.035           | 0.815 | 0.662         | 0.16     | 0.039      | 0.022    | -0.06 | 0.09  | 0.924     | 0.004       | 0.339  | 0.917   | -4.55e-03 | 0.008   | 0.014 | 0.037 |
| 16875_13  | MAOGB1   | MGN2      | 0.23                      | 0.012 | 0.518    | 0.017 | 0.035           | 0.815 | 0.662         | 0.16     | 0.039      | 0.022    | -0.06 | 0.09  | 0.924     | 0.004       | 0.339  | 0.917   | -4.55e-03 | 0.008   | 0.014 | 0.037 |
| 16897_8   | MIR45    | MIR45     | 0.23                      | 0.012 | 0.518    | 0.017 | 0.035           | 0.815 | 0.662         | 0.16     | 0.039      | 0.022    | -0.06 | 0.09  | 0.924     | 0.004       | 0.339  | 0.917   | -4.55e-03 | 0.008   | 0.014 | 0.037 |
| 3872_2    | TPT1     | TCTP      | 0.23                      | 0.012 | 0.518    | 0.017 | 0.035           | 0.815 | 0.662         | 0.16     | 0.039      | 0.022    | -0.06 | 0.09  | 0.924     | 0.004       | 0.339  | 0.917   | -4.55e-03 | 0.008   | 0.014 | 0.037 |
| 10705_14  | STGALNA5 | SIATC     | 0.23                      | 0.012 | 0.518    | 0.017 | 0.035           | 0.815 | 0.662         | 0.16     | 0.039      | 0.022    | -0.06 | 0.09  | 0.924     | 0.004       | 0.339  | 0.917   | -4.55e-03 | 0.008   | 0.014 | 0.037 |
| 14209_28  | APBB1    | APBB1     | 0.23                      | 0.012 | 0.518    | 0.017 | 0.035           | 0.815 | 0.662         | 0.16     | 0.039      | 0.022    | -0.06 | 0.09  | 0.924     | 0.004       | 0.339  | 0.917   | -4.55e-03 | 0.008   | 0.014 | 0.037 |
| 12936_38  | RLBP1    | RLBP1     | 0.23                      | 0.012 | 0.518    | 0.017 | 0.035           | 0.815 | 0.662         | 0.16     | 0.039      | 0.022    | -0.06 | 0.09  | 0.924     | 0.004       | 0.339  | 0.917   | -4.55e-03 | 0.008   | 0.014 | 0.037 |
| 19367_34  | DCI      | D3D2      | 0.23                      | 0.012 | 0.518    | 0.017 | 0.035           | 0.815 | 0.662         | 0.16     | 0.039      | 0.022    | -0.06 | 0.09  | 0.924     | 0.004       | 0.339  | 0.917   | -4.55e-03 | 0.008   | 0.014 | 0.037 |
| 8609_25   | CAV3     | CAV3      | 0.23                      | 0.012 | 0.518    | 0.017 | 0.035           | 0.815 | 0.662         | 0.16     | 0.039      | 0.022    | -0.06 | 0.09  | 0.924     | 0.004       | 0.339  | 0.917   | -4.55e-03 | 0.008   | 0.014 | 0.037 |
| 5629_58   | KLRK1    | KLRK2A    | 0.23                      | 0.012 | 0.518    | 0.017 | 0.035           | 0.815 | 0.662         | 0.16     | 0.039      | 0.022    | -0.06 | 0.09  | 0.924     | 0.004       | 0.339  | 0.917   | -4.55e-03 | 0.008   | 0.014 | 0.037 |
| 9501_4    | PRRP6    | PRRP6     | 0.23                      | 0.012 | 0.518    | 0.017 | 0.035           | 0.815 | 0.662         | 0.16     | 0.039      | 0.022    | -0.06 | 0.09  | 0.924     | 0.004       | 0.339  | 0.917   | -4.55e-03 | 0.008   | 0.014 | 0.037 |
| 2848_6    | PLK3     | DK        | 0.23                      | 0.012 | 0.518    | 0.017 | 0.035           | 0.815 | 0.662         | 0.16     | 0.039      | 0.022    | -0.06 | 0.09  | 0.924     | 0.004       | 0.339  | 0.917   | -4.55e-03 | 0.008   | 0.014 | 0.037 |
| 12433_8   | ARL11    | ARL11     | 0.23                      | 0.012 | 0.518    | 0.017 | 0.035           | 0.815 | 0.662         | 0.16     | 0.039      | 0.022    | -0.06 | 0.09  | 0.924     | 0.004       | 0.339  | 0.917   | -4.55e-03 | 0.008   | 0.014 | 0     |





Table S5. Association of type 2 diabetes with Ferland plasma protein.

| SomaLogIC gene | Protein      | tsp           | Inverse variance weighted |      |      |      | MR Egger |      |      |      | Weighted median |      |      |      | Weighted mode |      |      |      |      |
|----------------|--------------|---------------|---------------------------|------|------|------|----------|------|------|------|-----------------|------|------|------|---------------|------|------|------|------|
|                |              |               | b1w                       | se1w | b2w  | se2w | b1w      | se1w | b2w  | se2w | b1w             | se1w | b2w  | se2w | b1w           | se1w | b2w  | se2w |      |
| 12827.37       | RG53         | RG53          | 0.20                      | 0.10 | 0.20 | 0.10 | 0.01     | 0.03 | 0.05 | 0.83 | 0.67            | 0.01 | 0.03 | 0.01 | 0.03          | 0.01 | 0.03 | 0.01 | 0.03 |
| 13330.10       | USO1         |               | 0.20                      | 0.10 | 0.20 | 0.10 | 0.01     | 0.03 | 0.05 | 0.83 | 0.67            | 0.01 | 0.03 | 0.01 | 0.03          | 0.01 | 0.03 | 0.01 | 0.03 |
| 13890.10       | pyruvate car |               | 0.20                      | 0.10 | 0.20 | 0.10 | 0.01     | 0.03 | 0.05 | 0.83 | 0.67            | 0.01 | 0.03 | 0.01 | 0.03          | 0.01 | 0.03 | 0.01 | 0.03 |
| 13999.10       | SH3B1        | SH3B1         | 0.20                      | 0.10 | 0.20 | 0.10 | 0.01     | 0.03 | 0.05 | 0.83 | 0.67            | 0.01 | 0.03 | 0.01 | 0.03          | 0.01 | 0.03 | 0.01 | 0.03 |
| 17747.45       | TRAF1        | TRAF1         | 0.20                      | 0.10 | 0.20 | 0.10 | 0.01     | 0.03 | 0.05 | 0.83 | 0.67            | 0.01 | 0.03 | 0.01 | 0.03          | 0.01 | 0.03 | 0.01 | 0.03 |
| 2741.22        | SIGLEC6      | Siglec-6      | 0.20                      | 0.10 | 0.20 | 0.10 | 0.01     | 0.03 | 0.05 | 0.83 | 0.67            | 0.01 | 0.03 | 0.01 | 0.03          | 0.01 | 0.03 | 0.01 | 0.03 |
| 3844.24        | NACA         | NACA          | 0.20                      | 0.10 | 0.20 | 0.10 | 0.01     | 0.03 | 0.05 | 0.83 | 0.67            | 0.01 | 0.03 | 0.01 | 0.03          | 0.01 | 0.03 | 0.01 | 0.03 |
| 4654.60        | MAPT         | MAP2          | 0.20                      | 0.10 | 0.20 | 0.10 | 0.01     | 0.03 | 0.05 | 0.83 | 0.67            | 0.01 | 0.03 | 0.01 | 0.03          | 0.01 | 0.03 | 0.01 | 0.03 |
| 9757.29        | ENAH         | ENAH          | 0.20                      | 0.10 | 0.20 | 0.10 | 0.01     | 0.03 | 0.05 | 0.83 | 0.67            | 0.01 | 0.03 | 0.01 | 0.03          | 0.01 | 0.03 | 0.01 | 0.03 |
| 13685.35       | PP2R2A       | PP2A, subunit | 0.20                      | 0.10 | 0.20 | 0.10 | 0.01     | 0.03 | 0.05 | 0.83 | 0.67            | 0.01 | 0.03 | 0.01 | 0.03          | 0.01 | 0.03 | 0.01 | 0.03 |
| 14684.17       | CANX2        | CANX          | 0.20                      | 0.10 | 0.20 | 0.10 | 0.01     | 0.03 | 0.05 | 0.83 | 0.67            | 0.01 | 0.03 | 0.01 | 0.03          | 0.01 | 0.03 | 0.01 | 0.03 |
| 16828.8        | COL6A1       | Collagen a1   | 0.20                      | 0.10 | 0.20 | 0.10 | 0.01     | 0.03 | 0.05 | 0.83 | 0.67            | 0.01 | 0.03 | 0.01 | 0.03          | 0.01 | 0.03 | 0.01 | 0.03 |
| 3172.28        | ARSB         | ARSB          | 0.20                      | 0.10 | 0.20 | 0.10 | 0.01     | 0.03 | 0.05 | 0.83 | 0.67            | 0.01 | 0.03 | 0.01 | 0.03          | 0.01 | 0.03 | 0.01 | 0.03 |
| 5317.33        | HTRA2        | HTRA2         | 0.20                      | 0.10 | 0.20 | 0.10 | 0.01     | 0.03 | 0.05 | 0.83 | 0.67            | 0.01 | 0.03 | 0.01 | 0.03          | 0.01 | 0.03 | 0.01 | 0.03 |
| 6285.71        | MLEC         | KO152         | 0.20                      | 0.10 | 0.20 | 0.10 | 0.01     | 0.03 | 0.05 | 0.83 | 0.67            | 0.01 | 0.03 | 0.01 | 0.03          | 0.01 | 0.03 | 0.01 | 0.03 |
| 10700.10       | RSF11        | RSF11         | 0.20                      | 0.10 | 0.20 | 0.10 | 0.01     | 0.03 | 0.05 | 0.83 | 0.67            | 0.01 | 0.03 | 0.01 | 0.03          | 0.01 | 0.03 | 0.01 | 0.03 |
| 14070.56       | ITSR         |               | 0.20                      | 0.10 | 0.20 | 0.10 | 0.01     | 0.03 | 0.05 | 0.83 | 0.67            | 0.01 | 0.03 | 0.01 | 0.03          | 0.01 | 0.03 | 0.01 | 0.03 |
| 14124.6        | EFNA2        | Ephrin-A2     | 0.20                      | 0.10 | 0.20 | 0.10 | 0.01     | 0.03 | 0.05 | 0.83 | 0.67            | 0.01 | 0.03 | 0.01 | 0.03          | 0.01 | 0.03 | 0.01 | 0.03 |
| 17916.22       | SUCY1        | SUCY1         | 0.20                      | 0.10 | 0.20 | 0.10 | 0.01     | 0.03 | 0.05 | 0.83 | 0.67            | 0.01 | 0.03 | 0.01 | 0.03          | 0.01 | 0.03 | 0.01 | 0.03 |
| 15686.49       | INHBC        |               | 0.20                      | 0.10 | 0.20 | 0.10 | 0.01     | 0.03 | 0.05 | 0.83 | 0.67            | 0.01 | 0.03 | 0.01 | 0.03          | 0.01 | 0.03 | 0.01 | 0.03 |
| 12746.4        | CYTH4        | CYTH4         | 0.20                      | 0.10 | 0.20 | 0.10 | 0.01     | 0.03 | 0.05 | 0.83 | 0.67            | 0.01 | 0.03 | 0.01 | 0.03          | 0.01 | 0.03 | 0.01 | 0.03 |
| 2911.27        | MDK          | SKIVIN        | 0.20                      | 0.10 | 0.20 | 0.10 | 0.01     | 0.03 | 0.05 | 0.83 | 0.67            | 0.01 | 0.03 | 0.01 | 0.03          | 0.01 | 0.03 | 0.01 | 0.03 |
| 4981.6         | DSC3         | DSC3          | 0.20                      | 0.10 | 0.20 | 0.10 | 0.01     | 0.03 | 0.05 | 0.83 | 0.67            | 0.01 | 0.03 | 0.01 | 0.03          | 0.01 | 0.03 | 0.01 | 0.03 |
| 5100.53        | SCARB2       | LAMP II       | 0.20                      | 0.10 | 0.20 | 0.10 | 0.01     | 0.03 | 0.05 | 0.83 | 0.67            | 0.01 | 0.03 | 0.01 | 0.03          | 0.01 | 0.03 | 0.01 | 0.03 |
| 6632.42        | ITGAS        | ITGA8         | 0.20                      | 0.10 | 0.20 | 0.10 | 0.01     | 0.03 | 0.05 | 0.83 | 0.67            | 0.01 | 0.03 | 0.01 | 0.03          | 0.01 | 0.03 | 0.01 | 0.03 |
| 13822.16       | PPP2R2A      | ZAS2          | 0.20                      | 0.10 | 0.20 | 0.10 | 0.01     | 0.03 | 0.05 | 0.83 | 0.67            | 0.01 | 0.03 | 0.01 | 0.03          | 0.01 | 0.03 | 0.01 | 0.03 |
| 14158.17       | ANXAS        | Annexin V     | 0.20                      | 0.10 | 0.20 | 0.10 | 0.01     | 0.03 | 0.05 | 0.83 | 0.67            | 0.01 | 0.03 | 0.01 | 0.03          | 0.01 | 0.03 | 0.01 | 0.03 |
| 2652.15        | RFP1         | RFP           | 0.20                      | 0.10 | 0.20 | 0.10 | 0.01     | 0.03 | 0.05 | 0.83 | 0.67            | 0.01 | 0.03 | 0.01 | 0.03          | 0.01 | 0.03 | 0.01 | 0.03 |
| 4413.3         | SLP1         | SLP1          | 0.20                      | 0.10 | 0.20 | 0.10 | 0.01     | 0.03 | 0.05 | 0.83 | 0.67            | 0.01 | 0.03 | 0.01 | 0.03          | 0.01 | 0.03 | 0.01 | 0.03 |
| 10722.13       | SLY1         | RSK9K         | 0.20                      | 0.10 | 0.20 | 0.10 | 0.01     | 0.03 | 0.05 | 0.83 | 0.67            | 0.01 | 0.03 | 0.01 | 0.03          | 0.01 | 0.03 | 0.01 | 0.03 |
| 17728.61       | CHMP2        | CHMP2A        | 0.20                      | 0.10 | 0.20 | 0.10 | 0.01     | 0.03 | 0.05 | 0.83 | 0.67            | 0.01 | 0.03 | 0.01 | 0.03          | 0.01 | 0.03 | 0.01 | 0.03 |
| 4673.13        | L6           | L6            | 0.20                      | 0.10 | 0.20 | 0.10 | 0.01     | 0.03 | 0.05 | 0.83 | 0.67            | 0.01 | 0.03 | 0.01 | 0.03          | 0.01 | 0.03 | 0.01 | 0.03 |
| 10723.02       | SETD2        | SETD2         | 0.20                      | 0.10 | 0.20 | 0.10 | 0.01     | 0.03 | 0.05 | 0.83 | 0.67            | 0.01 | 0.03 | 0.01 | 0.03          | 0.01 | 0.03 | 0.01 | 0.03 |
| 6020.52        | UTS2         | Utriosin-1b   | 0.20                      | 0.10 | 0.20 | 0.10 | 0.01     | 0.03 | 0.05 | 0.83 | 0.67            | 0.01 | 0.03 | 0.01 | 0.03          | 0.01 | 0.03 | 0.01 | 0.03 |
| 15503.29       | LFYF2        | Leu-4         | 0.20                      | 0.10 | 0.20 | 0.10 | 0.01     | 0.03 | 0.05 | 0.83 | 0.67            | 0.01 | 0.03 | 0.01 | 0.03          | 0.01 | 0.03 | 0.01 | 0.03 |
| 17520.170      | MLF1         | MLF1          | 0.20                      | 0.10 | 0.20 | 0.10 | 0.01     | 0.03 | 0.05 | 0.83 | 0.67            | 0.01 | 0.03 | 0.01 | 0.03          | 0.01 | 0.03 | 0.01 | 0.03 |
| 8043.153       | COMP         | COMP          | 0.20                      | 0.10 | 0.20 | 0.10 | 0.01     | 0.03 | 0.05 | 0.83 | 0.67            | 0.01 | 0.03 | 0.01 | 0.03          | 0.01 | 0.03 | 0.01 | 0.03 |
| 13688.30       | PSMD4        | PSMD4         | 0.20                      | 0.10 | 0.20 | 0.10 | 0.01     | 0.03 | 0.05 | 0.83 | 0.67            | 0.01 | 0.03 | 0.01 | 0.03          | 0.01 | 0.03 | 0.01 | 0.03 |
| 4127.15        | CS           | CS            | 0.20                      | 0.10 | 0.20 | 0.10 | 0.01     | 0.03 | 0.05 | 0.83 | 0.67            | 0.01 | 0.03 | 0.01 | 0.03          | 0.01 | 0.03 | 0.01 | 0.03 |
| 5272.55        | SHC3         | SHC3          | 0.20                      | 0.10 | 0.20 | 0.10 | 0.01     | 0.03 | 0.05 | 0.83 | 0.67            | 0.01 | 0.03 | 0.01 | 0.03          | 0.01 | 0.03 | 0.01 | 0.03 |
| 12975.8        | HMBG3        | HMBG3         | 0.20                      | 0.10 | 0.20 | 0.10 | 0.01     | 0.03 | 0.05 | 0.83 | 0.67            | 0.01 | 0.03 | 0.01 | 0.03          | 0.01 | 0.03 | 0.01 | 0.03 |
| 16188.12       | CATM         | CATM          | 0.20                      | 0.10 | 0.20 | 0.10 | 0.01     | 0.03 | 0.05 | 0.83 | 0.67            | 0.01 | 0.03 | 0.01 | 0.03          | 0.01 | 0.03 | 0.01 | 0.03 |
| 13485.48       | HCAR2        | HCAR2         | 0.20                      | 0.10 | 0.20 | 0.10 | 0.01     | 0.03 | 0.05 | 0.83 | 0.67            | 0.01 | 0.03 | 0.01 | 0.03          | 0.01 | 0.03 | 0.01 | 0.03 |
| 13322.25       | CHEP1R       | NEPR1         | 0.20                      | 0.10 | 0.20 | 0.10 | 0.01     | 0.03 | 0.05 | 0.83 | 0.67            | 0.01 | 0.03 | 0.01 | 0.03          | 0.01 | 0.03 | 0.01 | 0.03 |
| 15482.98       | CO3A         | CO3A          | 0.20                      | 0.10 | 0.20 | 0.10 | 0.01     | 0.03 | 0.05 | 0.83 | 0.67            | 0.01 | 0.03 | 0.01 | 0.03          | 0.01 | 0.03 | 0.01 | 0.03 |
| 16584.44       | FAM          | FAM1          | 0.20                      | 0.10 | 0.20 | 0.10 | 0.01     | 0.03 | 0.05 | 0.83 | 0.67            | 0.01 | 0.03 | 0.01 | 0.03          | 0.01 | 0.03 | 0.01 | 0.03 |
| 2794.60        | SOD1         | SOD1          | 0.20                      | 0.10 | 0.20 | 0.10 | 0.01     | 0.03 | 0.05 | 0.83 | 0.67            | 0.01 | 0.03 | 0.01 | 0.03          | 0.01 | 0.03 | 0.01 | 0.03 |
| 5014.49        | NCK1         | NCK1          | 0.20                      | 0.10 | 0.20 | 0.10 | 0.01     | 0.03 | 0.05 | 0.83 | 0.67            | 0.01 | 0.03 | 0.01 | 0.03          | 0.01 | 0.03 | 0.01 | 0.03 |
| 5070.76        | TNFRSF8      | DR3           | 0.20                      | 0.10 | 0.20 | 0.10 | 0.01     | 0.03 | 0.05 | 0.83 | 0.67            | 0.01 | 0.03 | 0.01 | 0.03          | 0.01 | 0.03 | 0.01 | 0.03 |
| 5070.76        | TNFRSF8      | DR3           | 0.20                      | 0.10 | 0.20 | 0.10 | 0.01     | 0.03 | 0.05 | 0.83 | 0.67            | 0.01 | 0.03 | 0.01 | 0.03          | 0.01 | 0.03 | 0.01 | 0.03 |
| 5070.76        | TNFRSF8      | DR3           | 0.20                      | 0.10 | 0.20 | 0.10 | 0.01     | 0.03 | 0.05 | 0.83 | 0.67            | 0.01 | 0.03 | 0.01 | 0.03          | 0.01 | 0.03 | 0.01 | 0.03 |
| 5070.76        | TNFRSF8      | DR3           | 0.20                      | 0.10 | 0.20 | 0.10 | 0.01     | 0.03 | 0.05 | 0.83 | 0.67            | 0.01 | 0.03 | 0.01 | 0.03          | 0.01 | 0.03 | 0.01 | 0.03 |
| 5070.76        | TNFRSF8      | DR3           | 0.20                      | 0.10 | 0.20 | 0.10 | 0.01     | 0.03 | 0.05 | 0.83 | 0.67            | 0.01 | 0.03 | 0.01 | 0.03          | 0.01 | 0.03 | 0.01 | 0.03 |
| 5070.76        | TNFRSF8      | DR3           | 0.20                      | 0.10 | 0.20 | 0.10 | 0.01     | 0.03 | 0.05 | 0.83 | 0.67            | 0.01 | 0.03 | 0.01 | 0.03          | 0.01 | 0.03 | 0.01 | 0.03 |
| 5070.76        | TNFRSF8      | DR3           | 0.20                      | 0.10 | 0.20 | 0.10 | 0.01     | 0.03 | 0.05 | 0.83 | 0.67            | 0.01 | 0.03 | 0.01 | 0.03          | 0.01 | 0.03 | 0.01 | 0.03 |
| 5070.76        | TNFRSF8      | DR3           | 0.20                      | 0.10 | 0.20 | 0.10 | 0.01     | 0.03 | 0.05 | 0.83 | 0.67            | 0.01 | 0.03 | 0.01 | 0.03          | 0.01 | 0.03 | 0.01 | 0.03 |
| 5070.76        | TNFRSF8      | DR3           | 0.20                      | 0.10 | 0.20 | 0.10 | 0.01     | 0.03 | 0.05 | 0.83 | 0.67            | 0.01 | 0.03 | 0.01 | 0.03          | 0.01 | 0.03 | 0.01 | 0.03 |
| 5070.76        | TNFRSF8      | DR3           | 0.20                      | 0.10 | 0.20 | 0.10 | 0.01     | 0.03 | 0.05 | 0.83 | 0.67            | 0.01 | 0.03 | 0.01 | 0.03          | 0.01 | 0.03 | 0.01 | 0.03 |
| 5070.7         |              |               |                           |      |      |      |          |      |      |      |                 |      |      |      |               |      |      |      |      |

Table S5. Association of type 2 diabetes with Ferland plasma protein.

| SomaLogic | Protein    | Enzyme                  | rnp | b/w    | Inverse variance weighted |       |                    |       | MR Egger |      |      |       | Weighted median     |       |       |       | Weighted mode |         |                    |         |           |         |                    |
|-----------|------------|-------------------------|-----|--------|---------------------------|-------|--------------------|-------|----------|------|------|-------|---------------------|-------|-------|-------|---------------|---------|--------------------|---------|-----------|---------|--------------------|
|           |            |                         |     |        | se                        | se,2w | pval,1w            | CI,1w | FOR,2w   | Q    | pval | se,2w | pval,1w             | CI,1w | se    | pval  | se,2w         | pval,1w | CI,1w              | se,mode | pval,mode | CI,mode |                    |
| 13726_4   | CD80       | B7                      | 226 | -0.009 | 0.020                     | 0.655 | 0.01 (-0.03, 0.05) | 0.878 | 0.78     | 0.04 | 0.09 | 0.589 | 0.854 (-0.08, 0.08) | 0.001 | 0.815 | 0.040 | 0.326         | 0.249   | 0.04 (-0.03, 0.11) | 0.032   | 0.40      | 0.425   | 0.03 (-0.05, 0.11) |
| 13337_75  | CAND1      | CAND1                   | 226 | -0.009 | 0.020                     | 0.655 | 0.01 (-0.03, 0.05) | 0.878 | 0.78     | 0.04 | 0.09 | 0.589 | 0.854 (-0.08, 0.08) | 0.001 | 0.815 | 0.040 | 0.326         | 0.249   | 0.04 (-0.03, 0.11) | 0.032   | 0.40      | 0.425   | 0.03 (-0.05, 0.11) |
| 15805_1   | RXN1       | Keratin-16              | 226 | -0.009 | 0.020                     | 0.655 | 0.01 (-0.03, 0.05) | 0.878 | 0.78     | 0.04 | 0.09 | 0.589 | 0.854 (-0.08, 0.08) | 0.001 | 0.815 | 0.040 | 0.326         | 0.249   | 0.04 (-0.03, 0.11) | 0.032   | 0.40      | 0.425   | 0.03 (-0.05, 0.11) |
| 18398_5   | FXR1       | Farnesyl transferase-1  | 226 | -0.009 | 0.020                     | 0.655 | 0.01 (-0.03, 0.05) | 0.878 | 0.78     | 0.04 | 0.09 | 0.589 | 0.854 (-0.08, 0.08) | 0.001 | 0.815 | 0.040 | 0.326         | 0.249   | 0.04 (-0.03, 0.11) | 0.032   | 0.40      | 0.425   | 0.03 (-0.05, 0.11) |
| 16504_22  | DTYRK      | Protein tyrosine kinase | 226 | -0.009 | 0.020                     | 0.655 | 0.01 (-0.03, 0.05) | 0.878 | 0.78     | 0.04 | 0.09 | 0.589 | 0.854 (-0.08, 0.08) | 0.001 | 0.815 | 0.040 | 0.326         | 0.249   | 0.04 (-0.03, 0.11) | 0.032   | 0.40      | 0.425   | 0.03 (-0.05, 0.11) |
| 2682_58   | HSP40      | HSP60                   | 226 | -0.009 | 0.020                     | 0.655 | 0.01 (-0.03, 0.05) | 0.878 | 0.78     | 0.04 | 0.09 | 0.589 | 0.854 (-0.08, 0.08) | 0.001 | 0.815 | 0.040 | 0.326         | 0.249   | 0.04 (-0.03, 0.11) | 0.032   | 0.40      | 0.425   | 0.03 (-0.05, 0.11) |
| 3024_1    | GFP1       | GFP                     | 226 | -0.009 | 0.020                     | 0.655 | 0.01 (-0.03, 0.05) | 0.878 | 0.78     | 0.04 | 0.09 | 0.589 | 0.854 (-0.08, 0.08) | 0.001 | 0.815 | 0.040 | 0.326         | 0.249   | 0.04 (-0.03, 0.11) | 0.032   | 0.40      | 0.425   | 0.03 (-0.05, 0.11) |
| 6082_51   | L1EARL1    | L1EARL1                 | 226 | -0.009 | 0.020                     | 0.655 | 0.01 (-0.03, 0.05) | 0.878 | 0.78     | 0.04 | 0.09 | 0.589 | 0.854 (-0.08, 0.08) | 0.001 | 0.815 | 0.040 | 0.326         | 0.249   | 0.04 (-0.03, 0.11) | 0.032   | 0.40      | 0.425   | 0.03 (-0.05, 0.11) |
| 6361_49   | PTFR3      | PTFR3                   | 226 | -0.009 | 0.020                     | 0.655 | 0.01 (-0.03, 0.05) | 0.878 | 0.78     | 0.04 | 0.09 | 0.589 | 0.854 (-0.08, 0.08) | 0.001 | 0.815 | 0.040 | 0.326         | 0.249   | 0.04 (-0.03, 0.11) | 0.032   | 0.40      | 0.425   | 0.03 (-0.05, 0.11) |
| 6997_32   | RAB2B      | RAB2B                   | 226 | -0.011 | 0.024                     | 0.653 | 0.01 (-0.03, 0.04) | 0.878 | 0.78     | 0.04 | 0.09 | 0.589 | 0.854 (-0.08, 0.08) | 0.001 | 0.815 | 0.040 | 0.326         | 0.249   | 0.04 (-0.03, 0.11) | 0.032   | 0.40      | 0.425   | 0.03 (-0.05, 0.11) |
| 6957_19   | ADRM1      | ADRM1                   | 226 | -0.009 | 0.020                     | 0.655 | 0.01 (-0.03, 0.05) | 0.878 | 0.78     | 0.04 | 0.09 | 0.589 | 0.854 (-0.08, 0.08) | 0.001 | 0.815 | 0.040 | 0.326         | 0.249   | 0.04 (-0.03, 0.11) | 0.032   | 0.40      | 0.425   | 0.03 (-0.05, 0.11) |
| 8974_28   | KCNMB2     | p15 <sup>INK4b</sup>    | 226 | -0.009 | 0.020                     | 0.655 | 0.01 (-0.03, 0.05) | 0.878 | 0.78     | 0.04 | 0.09 | 0.589 | 0.854 (-0.08, 0.08) | 0.001 | 0.815 | 0.040 | 0.326         | 0.249   | 0.04 (-0.03, 0.11) | 0.032   | 0.40      | 0.425   | 0.03 (-0.05, 0.11) |
| 11662_1   | IDCC3C     | IDCC3C                  | 226 | -0.009 | 0.020                     | 0.655 | 0.01 (-0.03, 0.05) | 0.878 | 0.78     | 0.04 | 0.09 | 0.589 | 0.854 (-0.08, 0.08) | 0.001 | 0.815 | 0.040 | 0.326         | 0.249   | 0.04 (-0.03, 0.11) | 0.032   | 0.40      | 0.425   | 0.03 (-0.05, 0.11) |
| 16905_5   | PDSEA      | PDSEA                   | 226 | -0.009 | 0.020                     | 0.655 | 0.01 (-0.03, 0.05) | 0.878 | 0.78     | 0.04 | 0.09 | 0.589 | 0.854 (-0.08, 0.08) | 0.001 | 0.815 | 0.040 | 0.326         | 0.249   | 0.04 (-0.03, 0.11) | 0.032   | 0.40      | 0.425   | 0.03 (-0.05, 0.11) |
| 8878_48   | YTHDC1     | YTHDC1                  | 226 | -0.009 | 0.020                     | 0.655 | 0.01 (-0.03, 0.05) | 0.878 | 0.78     | 0.04 | 0.09 | 0.589 | 0.854 (-0.08, 0.08) | 0.001 | 0.815 | 0.040 | 0.326         | 0.249   | 0.04 (-0.03, 0.11) | 0.032   | 0.40      | 0.425   | 0.03 (-0.05, 0.11) |
| 9116_1    | PSD2       | PSD2                    | 226 | -0.009 | 0.020                     | 0.655 | 0.01 (-0.03, 0.05) | 0.878 | 0.78     | 0.04 | 0.09 | 0.589 | 0.854 (-0.08, 0.08) | 0.001 | 0.815 | 0.040 | 0.326         | 0.249   | 0.04 (-0.03, 0.11) | 0.032   | 0.40      | 0.425   | 0.03 (-0.05, 0.11) |
| 10202_14  | KRDL5A     | KRDL5A                  | 226 | -0.009 | 0.020                     | 0.655 | 0.01 (-0.03, 0.05) | 0.878 | 0.78     | 0.04 | 0.09 | 0.589 | 0.854 (-0.08, 0.08) | 0.001 | 0.815 | 0.040 | 0.326         | 0.249   | 0.04 (-0.03, 0.11) | 0.032   | 0.40      | 0.425   | 0.03 (-0.05, 0.11) |
| 17364_8   | SNRR2B     | SNRR2B                  | 226 | -0.008 | 0.018                     | 0.657 | 0.01 (-0.03, 0.04) | 0.879 | 0.78     | 0.04 | 0.09 | 0.589 | 0.854 (-0.08, 0.08) | 0.001 | 0.815 | 0.040 | 0.326         | 0.249   | 0.04 (-0.03, 0.11) | 0.032   | 0.40      | 0.425   | 0.03 (-0.05, 0.11) |
| 18202_14  | SRH1       | SRH1                    | 226 | -0.008 | 0.018                     | 0.657 | 0.01 (-0.03, 0.04) | 0.879 | 0.78     | 0.04 | 0.09 | 0.589 | 0.854 (-0.08, 0.08) | 0.001 | 0.815 | 0.040 | 0.326         | 0.249   | 0.04 (-0.03, 0.11) | 0.032   | 0.40      | 0.425   | 0.03 (-0.05, 0.11) |
| 19169_38  | FIBP       | FIBP                    | 226 | -0.008 | 0.018                     | 0.657 | 0.01 (-0.03, 0.04) | 0.879 | 0.78     | 0.04 | 0.09 | 0.589 | 0.854 (-0.08, 0.08) | 0.001 | 0.815 | 0.040 | 0.326         | 0.249   | 0.04 (-0.03, 0.11) | 0.032   | 0.40      | 0.425   | 0.03 (-0.05, 0.11) |
| 3630_27   | CAZM3      | Neurin-like 1           | 226 | -0.008 | 0.018                     | 0.657 | 0.01 (-0.03, 0.04) | 0.879 | 0.78     | 0.04 | 0.09 | 0.589 | 0.854 (-0.08, 0.08) | 0.001 | 0.815 | 0.040 | 0.326         | 0.249   | 0.04 (-0.03, 0.11) | 0.032   | 0.40      | 0.425   | 0.03 (-0.05, 0.11) |
| 8670_38   | NPM1       | NPM1                    | 226 | -0.008 | 0.018                     | 0.657 | 0.01 (-0.03, 0.04) | 0.879 | 0.78     | 0.04 | 0.09 | 0.589 | 0.854 (-0.08, 0.08) | 0.001 | 0.815 | 0.040 | 0.326         | 0.249   | 0.04 (-0.03, 0.11) | 0.032   | 0.40      | 0.425   | 0.03 (-0.05, 0.11) |
| 9753_17   | EZR        | EZR                     | 226 | -0.008 | 0.018                     | 0.657 | 0.01 (-0.03, 0.04) | 0.879 | 0.78     | 0.04 | 0.09 | 0.589 | 0.854 (-0.08, 0.08) | 0.001 | 0.815 | 0.040 | 0.326         | 0.249   | 0.04 (-0.03, 0.11) | 0.032   | 0.40      | 0.425   | 0.03 (-0.05, 0.11) |
| 7879_12   | CYP3A4     | Cytochrome P450 3A4     | 226 | -0.009 | 0.021                     | 0.658 | 0.01 (-0.03, 0.05) | 0.879 | 0.77     | 0.04 | 0.09 | 0.589 | 0.854 (-0.08, 0.08) | 0.001 | 0.815 | 0.040 | 0.326         | 0.249   | 0.04 (-0.03, 0.11) | 0.032   | 0.40      | 0.425   | 0.03 (-0.05, 0.11) |
| 12706_2   | CD42BPB    | CD42BPB                 | 226 | -0.009 | 0.021                     | 0.658 | 0.01 (-0.03, 0.05) | 0.879 | 0.77     | 0.04 | 0.09 | 0.589 | 0.854 (-0.08, 0.08) | 0.001 | 0.815 | 0.040 | 0.326         | 0.249   | 0.04 (-0.03, 0.11) | 0.032   | 0.40      | 0.425   | 0.03 (-0.05, 0.11) |
| 2571_12   | IGFBP3     | IGFBP3                  | 226 | -0.008 | 0.018                     | 0.658 | 0.01 (-0.03, 0.04) | 0.879 | 0.78     | 0.04 | 0.09 | 0.589 | 0.854 (-0.08, 0.08) | 0.001 | 0.815 | 0.040 | 0.326         | 0.249   | 0.04 (-0.03, 0.11) | 0.032   | 0.40      | 0.425   | 0.03 (-0.05, 0.11) |
| 8458_11   | SNCA       | α-Synuclein             | 226 | -0.008 | 0.018                     | 0.658 | 0.01 (-0.03, 0.04) | 0.879 | 0.78     | 0.04 | 0.09 | 0.589 | 0.854 (-0.08, 0.08) | 0.001 | 0.815 | 0.040 | 0.326         | 0.249   | 0.04 (-0.03, 0.11) | 0.032   | 0.40      | 0.425   | 0.03 (-0.05, 0.11) |
| 8730_22   | CHDC       | CHDC                    | 226 | -0.009 | 0.021                     | 0.658 | 0.01 (-0.03, 0.05) | 0.879 | 0.77     | 0.04 | 0.09 | 0.589 | 0.854 (-0.08, 0.08) | 0.001 | 0.815 | 0.040 | 0.326         | 0.249   | 0.04 (-0.03, 0.11) | 0.032   | 0.40      | 0.425   | 0.03 (-0.05, 0.11) |
| 12895_62  | KLHL12     | KLHL12                  | 226 | -0.008 | 0.018                     | 0.658 | 0.01 (-0.03, 0.04) | 0.879 | 0.78     | 0.04 | 0.09 | 0.589 | 0.854 (-0.08, 0.08) | 0.001 | 0.815 | 0.040 | 0.326         | 0.249   | 0.04 (-0.03, 0.11) | 0.032   | 0.40      | 0.425   | 0.03 (-0.05, 0.11) |
| 19334_52  | TXNDC12    | TXNDC12                 | 226 | -0.008 | 0.018                     | 0.658 | 0.01 (-0.03, 0.04) | 0.879 | 0.78     | 0.04 | 0.09 | 0.589 | 0.854 (-0.08, 0.08) | 0.001 | 0.815 | 0.040 | 0.326         | 0.249   | 0.04 (-0.03, 0.11) | 0.032   | 0.40      | 0.425   | 0.03 (-0.05, 0.11) |
| 2962_50   | PTPLH      | PTPLH                   | 226 | -0.008 | 0.018                     | 0.658 | 0.01 (-0.03, 0.04) | 0.879 | 0.78     | 0.04 | 0.09 | 0.589 | 0.854 (-0.08, 0.08) | 0.001 | 0.815 | 0.040 | 0.326         | 0.249   | 0.04 (-0.03, 0.11) | 0.032   | 0.40      | 0.425   | 0.03 (-0.05, 0.11) |
| 3809_3    | FGFR3      | FGFR3                   | 226 | -0.008 | 0.018                     | 0.658 | 0.01 (-0.03, 0.04) | 0.879 | 0.78     | 0.04 | 0.09 | 0.589 | 0.854 (-0.08, 0.08) | 0.001 | 0.815 | 0.040 | 0.326         | 0.249   | 0.04 (-0.03, 0.11) | 0.032   | 0.40      | 0.425   | 0.03 (-0.05, 0.11) |
| 9445_44   | C18orf8    | C18orf8                 | 226 | -0.009 | 0.021                     | 0.659 | 0.01 (-0.03, 0.05) | 0.880 | 0.80     | 0.04 | 0.10 | 0.600 | 0.924 (-0.04, 0.04) | 0.001 | 0.816 | 0.040 | 0.327         | 0.250   | 0.04 (-0.03, 0.11) | 0.032   | 0.40      | 0.425   | 0.03 (-0.05, 0.11) |
| 7305_28   | LARGE      | LARGE                   | 226 | -0.009 | 0.021                     | 0.659 | 0.01 (-0.03, 0.05) | 0.880 | 0.80     | 0.04 | 0.10 | 0.600 | 0.924 (-0.04, 0.04) | 0.001 | 0.816 | 0.040 | 0.327         | 0.250   | 0.04 (-0.03, 0.11) | 0.032   | 0.40      | 0.425   | 0.03 (-0.05, 0.11) |
| 10608_9   | HTH1       | HIS1                    | 226 | -0.008 | 0.018                     | 0.661 | 0.01 (-0.03, 0.04) | 0.880 | 0.80     | 0.04 | 0.10 | 0.600 | 0.924 (-0.04, 0.04) | 0.001 | 0.816 | 0.040 | 0.327         | 0.250   | 0.04 (-0.03, 0.11) | 0.032   | 0.40      | 0.425   | 0.03 (-0.05, 0.11) |
| 12516_26  | NPST       | NPST                    | 226 | -0.008 | 0.018                     | 0.661 | 0.01 (-0.03, 0.04) | 0.880 | 0.80     | 0.04 | 0.10 | 0.600 | 0.924 (-0.04, 0.04) | 0.001 | 0.816 | 0.040 | 0.327         | 0.250   | 0.04 (-0.03, 0.11) | 0.032   | 0.40      | 0.425   | 0.03 (-0.05, 0.11) |
| 13642_90  | KPNA4      | KPNA4                   | 226 | -0.008 | 0.018                     | 0.661 | 0.01 (-0.03, 0.04) | 0.880 | 0.80     | 0.04 | 0.10 | 0.600 | 0.924 (-0.04, 0.04) | 0.001 | 0.816 | 0.040 | 0.327         | 0.250   | 0.04 (-0.03, 0.11) | 0.032   | 0.40      | 0.425   | 0.03 (-0.05, 0.11) |
| 12982_18  | ITPA3      | ITPA3                   | 226 | -0.008 | 0.018                     | 0.661 | 0.01 (-0.03, 0.04) | 0.880 | 0.80     | 0.04 | 0.10 | 0.600 | 0.924 (-0.04, 0.04) | 0.001 | 0.816 | 0.040 | 0.327         | 0.250   | 0.04 (-0.03, 0.11) | 0.032   | 0.40      | 0.425   | 0.03 (-0.05, 0.11) |
| 13942_90  | ITPA3      | ITPA3                   | 226 | -0.008 | 0.018                     | 0.661 | 0.01 (-0.03, 0.04) | 0.880 | 0.80     | 0.04 | 0.10 | 0.600 | 0.924 (-0.04, 0.04) | 0.001 | 0.816 | 0.040 | 0.327         | 0.250   | 0.04 (-0.03, 0.11) | 0.032   | 0.40      | 0.425   | 0.03 (-0.05, 0.11) |
| 12475_18  | PKB        | PKB                     | 226 | -0.008 | 0.018                     | 0.661 | 0.01 (-0.03, 0.04) | 0.880 | 0.80     | 0.04 | 0.10 | 0.600 | 0.924 (-0.04, 0.04) | 0.001 | 0.816 | 0.040 | 0.327         | 0.250   | 0.04 (-0.03, 0.11) | 0.032   | 0.40      | 0.425   | 0.03 (-0.05, 0.11) |
| 5735_54   | C1GALT1C1C | C1GALT1C1C              | 226 | -0.021 | 0.049                     | 0.661 | 0.02 (-0.07, 0.12) | 0.880 | 0.80     | 0.04 | 0.10 | 0.600 | 0.924 (-0.04, 0.04) | 0.001 | 0.816 | 0.040 | 0.327         | 0.250   | 0.04 (-0.03, 0.11) | 0.032   | 0.40      | 0.425   | 0.03 (-0.05, 0.11) |
| 8973_23   | FCRL4      | FCRL4                   | 226 | -0.009 | 0.022                     | 0.661 | 0.01 (-0.03, 0.05) | 0.880 | 0.80     | 0.04 | 0.10 | 0.600 | 0.924 (-0.04, 0.04) | 0.001 | 0.816 | 0.040 | 0.327         | 0.250   | 0.04 (-0.03, 0.11) | 0.032   | 0.40      | 0.425   | 0.03 (-0.05, 0.11) |
| 10955_4   | CLEC4E     | CLEC4E                  | 226 | -0.009 | 0.022                     | 0.661 | 0.01 (-0.03, 0.05) | 0.880 | 0.80     | 0.04 | 0.10 | 0.600 | 0.924 (-0.04, 0.04) | 0.001 | 0.816 | 0.040 | 0.327         | 0.250   | 0.04 (-0.03, 0.11) | 0.032   | 0.40      | 0.425   | 0.03 (-0.05, 0.11) |
| 16847_39  |            |                         |     |        |                           |       |                    |       |          |      |      |       |                     |       |       |       |               |         |                    |         |           |         |                    |





Table S5. Association of type 2 diabetes with Finland plasma protein.

| SomaLigase | Protein  | nsnp     | Inverse variance weights |       | MR Egger |       | Weighted median        |       | Weighted mode |         |            |          |                       |        |        |        |       |                   |                     |        |         |                   |                        |
|------------|----------|----------|--------------------------|-------|----------|-------|------------------------|-------|---------------|---------|------------|----------|-----------------------|--------|--------|--------|-------|-------------------|---------------------|--------|---------|-------------------|------------------------|
|            |          |          | b/w                      | se/bw | pval/IV  | CI/w  | FOR_IV                 | b/w   | begger        | seegger | pval/egger | CI/egger | b/w                   | se/w   | pval/w | CI/w   |       |                   |                     |        |         |                   |                        |
| 4545.53    | DNAJ19   | DnaJ19   | 226                      | 0.005 | 0.18     | 0.797 | 4.85e-03 (0.03, 0.04)  | 0.932 | 0.249         | 0.005   | 0.077      | 0.897    | 4.85e-03 (0.07, 0.08) | 0.001  | 0.995  | 0.044  | 0.31  | 0.161             | -0.041 (0.11, 0.02) | 0.001  | 0.938   | 0.178             | -0.05 (0.03, 0.02)     |
| 13482.14   | CNTN1    | CNTN1    | 226                      | 0.005 | 0.18     | 0.797 | 4.85e-03 (0.03, 0.04)  | 0.932 | 0.249         | 0.005   | 0.077      | 0.897    | 4.85e-03 (0.07, 0.08) | 0.001  | 0.995  | 0.044  | 0.31  | 0.161             | -0.041 (0.11, 0.02) | 0.001  | 0.938   | 0.178             | -0.05 (0.03, 0.02)     |
| 9003.59    | MARCO    | MARCO    | 226                      | 0.005 | 0.19     | 0.797 | 4.98e-03 (0.03, 0.04)  | 0.932 | 0.192         | 0.010   | 0.041      | 0.813    | -0.01 (0.09, 0.07)    | 0.001  | 0.679  | 0.007  | 0.038 | 0.862             | 0.01 (0.07, 0.08)   | -0.003 | 0.338   | 0.933             | 3.25e-03 (0.08, 0.07)  |
| 12358.6    | ISBP1    | ISBP1    | 226                      | 0.005 | 0.18     | 0.797 | 4.72e-03 (0.03, 0.04)  | 0.932 | 0.249         | 0.010   | 0.041      | 0.813    | -0.01 (0.09, 0.07)    | 0.001  | 0.679  | 0.007  | 0.038 | 0.862             | 0.01 (0.07, 0.08)   | -0.003 | 0.338   | 0.933             | 3.25e-03 (0.08, 0.07)  |
| 7740.33    | FATE1    | FATE1    | 226                      | 0.005 | 0.18     | 0.797 | 4.72e-03 (0.03, 0.04)  | 0.932 | 0.249         | 0.010   | 0.041      | 0.813    | -0.01 (0.09, 0.07)    | 0.001  | 0.679  | 0.007  | 0.038 | 0.862             | 0.01 (0.07, 0.08)   | -0.003 | 0.338   | 0.933             | 3.25e-03 (0.08, 0.07)  |
| 4270.47    | PSMA2    | PSA2     | 226                      | 0.006 | 0.221    | 0.798 | 0.01 (0.04, 0.05)      | 0.932 | 0.006         | -0.019  | 0.043      | 0.680    | -0.02 (0.10, 0.07)    | 0.002  | 0.514  | 0.011  | 0.040 | 0.776             | 0.01 (0.07, 0.09)   | 0.032  | 0.442   | 0.450             | 0.03 (0.05, 0.11)      |
| 17331.38   | KREM1    | KREM1    | 226                      | 0.006 | 0.223    | 0.798 | 0.01 (0.04, 0.05)      | 0.932 | 0.006         | -0.019  | 0.043      | 0.680    | -0.02 (0.10, 0.07)    | 0.002  | 0.514  | 0.011  | 0.040 | 0.776             | 0.01 (0.07, 0.09)   | 0.032  | 0.442   | 0.450             | 0.03 (0.05, 0.11)      |
| 6699.39    | EFEA     | EFEA     | 226                      | 0.006 | 0.223    | 0.798 | 0.01 (0.04, 0.05)      | 0.932 | 0.006         | -0.019  | 0.043      | 0.680    | -0.02 (0.10, 0.07)    | 0.002  | 0.514  | 0.011  | 0.040 | 0.776             | 0.01 (0.07, 0.09)   | 0.032  | 0.442   | 0.450             | 0.03 (0.05, 0.11)      |
| 6528.95    | EXTL2    | EXTL2    | 226                      | 0.006 | 0.222    | 0.799 | 0.01 (0.04, 0.05)      | 0.932 | 0.010         | -0.029  | 0.043      | 0.509    | -0.03 (0.11, 0.06)    | 0.002  | 0.365  | 0.028  | 0.040 | 0.484             | -0.03 (0.11, 0.05)  | -0.041 | 0.039   | 0.293             | 0.04 (-0.12, 0.04)     |
| 11485.4    | GPR135   | GPR135   | 226                      | 0.005 | 0.200    | 0.801 | -4.93e-03 (0.04, 0.03) | 0.933 | 0.183         | -0.078  | 0.041      | 0.058    | -0.04 (-0.16, 0.07)   | 0.005  | 0.400  | -0.042 | 0.035 | 0.237             | -0.04 (-0.11, 0.03) | -0.048 | 0.041   | 0.233             | -0.03 (0.03, 0.03)     |
| 11837.7    | RORC     | RORC     | 226                      | 0.005 | 0.200    | 0.801 | -4.93e-03 (0.04, 0.03) | 0.933 | 0.183         | -0.078  | 0.041      | 0.058    | -0.04 (-0.16, 0.07)   | 0.005  | 0.400  | -0.042 | 0.035 | 0.237             | -0.04 (-0.11, 0.03) | -0.048 | 0.041   | 0.233             | -0.03 (0.03, 0.03)     |
| 12475.48   | CLCS     | CLCS     | 226                      | 0.005 | 0.200    | 0.801 | -4.93e-03 (0.04, 0.03) | 0.933 | 0.183         | -0.078  | 0.041      | 0.058    | -0.04 (-0.16, 0.07)   | 0.005  | 0.400  | -0.042 | 0.035 | 0.237             | -0.04 (-0.11, 0.03) | -0.048 | 0.041   | 0.233             | -0.03 (0.03, 0.03)     |
| 14070.71   | SKL      | SKL      | 226                      | 0.004 | 0.177    | 0.800 | -4.42e-03 (0.04, 0.03) | 0.933 | 0.360         | -0.101  | 0.036      | 0.875    | -0.01 (0.08, 0.05)    | 0.001  | 0.532  | -0.006 | 0.036 | 0.876             | -0.01 (0.08, 0.06)  | -0.005 | 0.338   | 0.897             | 4.85e-03 (0.07, 0.08)  |
| 17400.71   | ACOR8    | ACOR8    | 226                      | 0.005 | 0.199    | 0.800 | -4.72e-03 (0.04, 0.03) | 0.933 | 0.178         | -0.008  | 0.039      | 0.815    | -0.01 (0.08, 0.07)    | 0.001  | 0.706  | 0.006  | 0.035 | 0.814             | -0.04 (0.10, 0.03)  | -0.038 | 0.030   | 0.407             | 0.04 (-0.11, 0.04)     |
| 17688.27   | TBC2B    | TBC2B    | 226                      | 0.005 | 0.199    | 0.800 | -4.85e-03 (0.04, 0.03) | 0.933 | 0.178         | -0.008  | 0.039      | 0.815    | -0.01 (0.08, 0.07)    | 0.001  | 0.706  | 0.006  | 0.035 | 0.814             | -0.04 (0.10, 0.03)  | -0.038 | 0.030   | 0.407             | 0.04 (-0.11, 0.04)     |
| 6443.65    | CCM1     | CCM1     | 226                      | 0.006 | 0.218    | 0.801 | 4.50e-03 (0.04, 0.03)  | 0.933 | 0.122         | -0.025  | 0.038      | 0.512    | -0.02 (0.10, 0.05)    | 0.002  | 0.375  | -0.004 | 0.028 | 0.253             | -0.03 (0.08, 0.02)  | -0.046 | 0.038   | 0.248             | -0.05 (0.10, 0.04)     |
| 4907.56    | FCM4     | FCM4     | 226                      | 0.006 | 0.218    | 0.801 | 4.50e-03 (0.04, 0.03)  | 0.933 | 0.122         | -0.025  | 0.038      | 0.512    | -0.02 (0.10, 0.05)    | 0.002  | 0.375  | -0.004 | 0.028 | 0.253             | -0.03 (0.08, 0.02)  | -0.046 | 0.038   | 0.248             | -0.05 (0.10, 0.04)     |
| 8086.15    | CHRDL2   | CHRDL2   | 226                      | 0.005 | 0.199    | 0.800 | -4.72e-03 (0.04, 0.03) | 0.933 | 0.405         | -0.038  | 0.038      | 0.347    | -0.04 (-0.11, 0.04)   | 0.002  | 0.348  | -0.027 | 0.034 | 0.433             | -0.03 (0.08, 0.04)  | -0.006 | 0.040   | 0.890             | -0.01 (0.08, 0.08)     |
| 7690.72    | BGN2T    | BGN2T    | 226                      | 0.008 | 0.300    | 0.801 | 0.01 (0.05, 0.04)      | 0.933 | 0.855         | -0.293  | 0.060      | 0.311    | 0.11 (0.01, 0.23)     | -0.006 | 0.003  | 0.040  | 0.391 | 0.03 (0.04, 0.11) | 0.055               | 0.042  | 0.944   | 0.05 (0.05, 0.14) |                        |
| 8045.3     | KRDL3    | KRDL3    | 226                      | 0.005 | 0.200    | 0.801 | -4.93e-03 (0.04, 0.03) | 0.933 | 0.227         | -0.007  | 0.041      | 0.884    | -0.01 (0.09, 0.07)    | 0.000  | 0.954  | -0.014 | 0.042 | 0.745             | -0.01 (-0.10, 0.07) | -0.022 | 0.047   | 0.966             | 2.00e-03 (0.09, 0.09)  |
| 8346.9     | DPPT     | DPPT     | 226                      | 0.005 | 0.199    | 0.801 | -4.89e-03 (0.04, 0.03) | 0.933 | 0.420         | -0.008  | 0.038      | 0.843    | -0.01 (0.07, 0.08)    | 0.000  | 0.931  | -0.010 | 0.036 | 0.790             | -0.01 (0.08, 0.08)  | -0.003 | 0.037   | 0.969             | 2.98e-03 (0.08, 0.07)  |
| 12462.20   | SETMAR   | SETMAR   | 226                      | 0.005 | 0.199    | 0.801 | -4.89e-03 (0.04, 0.03) | 0.933 | 0.420         | -0.008  | 0.038      | 0.843    | -0.01 (0.07, 0.08)    | 0.000  | 0.931  | -0.010 | 0.036 | 0.790             | -0.01 (0.08, 0.08)  | -0.003 | 0.037   | 0.969             | 2.98e-03 (0.08, 0.07)  |
| 14011.17   | S100A11  | S100A11  | 226                      | 0.005 | 0.199    | 0.801 | -4.89e-03 (0.04, 0.03) | 0.933 | 0.168         | -0.006  | 0.041      | 0.877    | -0.01 (0.09, 0.07)    | 0.000  | 0.987  | -0.002 | 0.043 | 0.963             | -0.04 (-0.13, 0.05) | -0.013 | 0.049   | 0.785             | 0.01 (0.08, 0.11)      |
| 3489.9     | CNTF     | CNTF     | 226                      | 0.005 | 0.199    | 0.802 | -4.70e-03 (0.04, 0.03) | 0.933 | 0.915         | -0.021  | 0.038      | 0.578    | -0.02 (0.09, 0.05)    | 0.001  | 0.619  | -0.031 | 0.039 | 0.449             | -0.03 (-0.11, 0.05) | -0.046 | 0.041   | 0.261             | -0.05 (0.13, 0.03)     |
| 13304.75   | RSPD3    | RSPD3    | 226                      | 0.005 | 0.199    | 0.803 | 4.76e-03 (0.04, 0.03)  | 0.934 | 0.936         | -0.003  | 0.038      | 0.442    | -0.03 (0.10, 0.05)    | 0.002  | 0.304  | -0.035 | 0.033 | 0.285             | -0.04 (-0.13, 0.03) | -0.044 | 0.040   | 0.278             | 0.04 (-0.12, 0.03)     |
| 18285.6    | SVP      | SVP      | 226                      | 0.005 | 0.200    | 0.803 | 4.86e-03 (0.04, 0.03)  | 0.934 | 0.583         | -0.035  | 0.039      | 0.380    | -0.03 (0.11, 0.04)    | 0.002  | 0.249  | -0.020 | 0.040 | 0.852             | -0.23 (-0.33, 0.06) | -0.001 | 0.037   | 0.976             | -1.13e-03 (0.07, 0.07) |
| 18285.24   | OC2H     | OC2H     | 226                      | 0.005 | 0.200    | 0.803 | 4.86e-03 (0.04, 0.03)  | 0.934 | 0.583         | -0.035  | 0.039      | 0.380    | -0.03 (0.11, 0.04)    | 0.002  | 0.249  | -0.020 | 0.040 | 0.852             | -0.23 (-0.33, 0.06) | -0.001 | 0.037   | 0.976             | -1.13e-03 (0.07, 0.07) |
| 6713.4     | LRP11    | LRP11    | 226                      | 0.005 | 0.199    | 0.804 | -4.76e-03 (0.04, 0.03) | 0.934 | 0.210         | 0.053   | 0.040      | 0.182    | 0.05 (0.02, 0.13)     | -0.004 | 0.094  | 0.032  | 0.035 | 0.353             | 0.03 (0.04, 0.10)   | 0.032  | 0.039   | 0.414             | 0.03 (0.04, 0.11)      |
| 11516.7    | FABP1    | FABP1    | 226                      | 0.005 | 0.201    | 0.804 | 0.01 (0.04, 0.05)      | 0.934 | 0.028         | 0.020   | 0.042      | 0.638    | 0.02 (0.06, 0.10)     | 0.001  | 0.687  | 0.005  | 0.037 | 0.885             | 0.01 (0.07, 0.08)   | 0.004  | 0.039   | 0.921             | 3.85e-03 (0.07, 0.08)  |
| 12381.20   | CBR1     | CBR1     | 226                      | 0.005 | 0.201    | 0.804 | 0.01 (0.04, 0.05)      | 0.934 | 0.028         | 0.020   | 0.042      | 0.638    | 0.02 (0.06, 0.10)     | 0.001  | 0.687  | 0.005  | 0.037 | 0.885             | 0.01 (0.07, 0.08)   | 0.004  | 0.039   | 0.921             | 3.85e-03 (0.07, 0.08)  |
| 8845.2     | ADAMTSS3 | ADAMTSS3 | 226                      | 0.005 | 0.199    | 0.805 | -4.78e-03 (0.04, 0.03) | 0.935 | 0.028         | 0.020   | 0.042      | 0.500    | 0.03 (0.05, 0.10)     | -0.002 | 0.359  | 0.008  | 0.041 | 0.845             | -0.01 (0.07, 0.09)  | -0.014 | 0.042   | 0.731             | -0.01 (0.10, 0.07)     |
| 13574.50   | RND3     | RND3     | 226                      | 0.005 | 0.202    | 0.806 | 0.01 (0.04, 0.05)      | 0.936 | 0.016         | -0.044  | 0.043      | 0.311    | -0.04 (0.13, 0.04)    | 0.003  | 0.191  | 0.028  | 0.040 | 0.508             | -0.03 (0.05, 0.10)  | -0.009 | 0.040   | 0.833             | -0.01 (0.10, 0.08)     |
| 10589.7    | ROSL1    | ROSL1    | 226                      | 0.005 | 0.202    | 0.806 | 0.01 (0.04, 0.05)      | 0.936 | 0.016         | -0.044  | 0.043      | 0.311    | -0.04 (0.13, 0.04)    | 0.003  | 0.191  | 0.028  | 0.040 | 0.508             | -0.03 (0.05, 0.10)  | -0.009 | 0.040   | 0.833             | -0.01 (0.10, 0.08)     |
| 10333.10   | CANL1    | CANL1    | 226                      | 0.005 | 0.202    | 0.806 | 0.01 (0.04, 0.05)      | 0.936 | 0.016         | -0.044  | 0.043      | 0.311    | -0.04 (0.13, 0.04)    | 0.003  | 0.191  | 0.028  | 0.040 | 0.508             | -0.03 (0.05, 0.10)  | -0.009 | 0.040   | 0.833             | -0.01 (0.10, 0.08)     |
| 9053.3     | CACTL5   | CACTL5   | 226                      | 0.005 | 0.202    | 0.806 | 0.01 (0.04, 0.05)      | 0.936 | 0.016         | -0.044  | 0.043      | 0.311    | -0.04 (0.13, 0.04)    | 0.003  | 0.191  | 0.028  | 0.040 | 0.508             | -0.03 (0.05, 0.10)  | -0.009 | 0.040   | 0.833             | -0.01 (0.10, 0.08)     |
| 13062.4    | GMFG     | GMFG     | 226                      | 0.005 | 0.199    | 0.807 | -4.61e-03 (0.04, 0.03) | 0.936 | 0.480         | -0.007  | 0.038      | 0.853    | -0.01 (0.08, 0.07)    | 0.001  | 0.724  | -0.024 | 0.039 | 0.538             | -0.02 (0.10, 0.05)  | -0.028 | 0.041   | 0.528             | -0.03 (0.11, 0.05)     |
| 15440.57   | PMK2     | PMK2     | 226                      | 0.005 | 0.199    | 0.807 | -4.74e-03 (0.04, 0.03) | 0.936 | 0.156         | -0.011  | 0.041      | 0.791    | -0.01 (0.09, 0.07)    | 0.001  | 0.863  | -0.028 | 0.035 | 0.459             | -0.03 (0.08, 0.04)  | -0.014 | 0.039   | 0.729             | -0.01 (0.09, 0.06)     |
| 17172.19   | STATH    | STATH    | 226                      | 0.005 | 0.199    | 0.807 | -4.74e-03 (0.04, 0.03) | 0.936 | 0.156         | -0.011  | 0.041      | 0.791    | -0.01 (0.09, 0.07)    | 0.001  | 0.863  | -0.028 | 0.035 | 0.459             | -0.03 (0.08, 0.04)  | -0.014 | 0.039   | 0.729             | -0.01 (0.09, 0.06)     |
| 10280.8    | PSMB8    | PSMB8    | 226                      | 0.005 | 0.199    | 0.808 | -4.73e-03 (0.04, 0.03) | 0.936 | 0.534         | 0.026   | 0.039      | 0.510    | 0.03 (0.05, 0.10)     | -0.002 | 0.369  | 0.020  | 0.040 | 0.615             | 0.02 (0.06, 0.10)   | 0.019  | 0.041</ |                   |                        |



| Table S5. Association of type 2 diabetes with Ferland plasma protein. |          | Inverse variance weighted |      | MR Egger |        | Weighted median |                        | Weighted mode |           |        |          |            |                        |          |        |         |           |         |                        |                    |
|-----------------------------------------------------------------------|----------|---------------------------|------|----------|--------|-----------------|------------------------|---------------|-----------|--------|----------|------------|------------------------|----------|--------|---------|-----------|---------|------------------------|--------------------|
| SNP                                                                   | Gene     | Protein                   | rsnp | b2w      | se.b2w | pval.iw         | CI.iw                  | FOR_ZW        | Q1        | lower  | se.egger | pval.egger | se.med                 | pval.med | b.mode | se.mode | pval.mode | CI.mode |                        |                    |
| 12854.3                                                               | TEAD3    | TEAD3                     | 226  | -0.003   | 0.020  | 0.897           | 2.53e-03 (0.04, 0.04)  | 0.966         | 0.109     | 0.045  | 0.042    | 0.776      | 0.05 (0.04, 0.1)       | -0.003   | 0.028  | -0.004  | 0.040     | 0.915   | -4.29e-03 (0.08, 0)    |                    |
| 14151.4                                                               | ISG15    | ISG15                     | 226  | -0.003   | 0.020  | 0.901           | 2.53e-03 (0.04, 0.04)  | 0.966         | 0.109     | 0.045  | 0.042    | 0.776      | 0.05 (0.04, 0.1)       | -0.003   | 0.028  | -0.004  | 0.040     | 0.915   | -4.29e-03 (0.08, 0)    |                    |
| 18919.10                                                              | HMG2A    | HMG2A                     | 226  | -0.002   | 0.019  | 0.900           | -2.40e-03 (0.04, 0.03) | 0.966         | 0.178     | 0.003  | 0.040    | 0.933      | -3.39e-03 (0.08, 0.08) | -0.000   | 0.027  | -0.040  | 0.037     | 0.275   | -0.04 (0.11, 0.03)     |                    |
| 2516.23                                                               | CH25H    | CH25H                     | 226  | -0.003   | 0.027  | 0.897           | 3.48e-03 (0.05, 0.06)  | 0.966         | 7.77e-16  | 0.052  | 0.040    | 0.831      | 0.05 (0.05, 0.1)       | -0.003   | 0.027  | -0.040  | 0.036     | 0.534   | 0.02 (0.09, 0.08)      |                    |
| 3455.4                                                                | KLHL6    | KLHL6                     | 226  | -0.002   | 0.019  | 0.899           | -2.46e-03 (0.04, 0.04) | 0.966         | 0.182     | 0.003  | 0.040    | 0.933      | -3.39e-03 (0.08, 0.08) | -0.000   | 0.027  | -0.040  | 0.037     | 0.275   | -0.04 (0.11, 0.03)     |                    |
| 3628.3                                                                | MP2K2    | MP2K2                     | 226  | -0.002   | 0.019  | 0.899           | -2.46e-03 (0.04, 0.04) | 0.966         | 0.182     | 0.003  | 0.040    | 0.933      | -3.39e-03 (0.08, 0.08) | -0.000   | 0.027  | -0.040  | 0.037     | 0.275   | -0.04 (0.11, 0.03)     |                    |
| 4138.25                                                               | L2P2     | L2P2                      | 226  | -0.002   | 0.018  | 0.899           | -2.46e-03 (0.04, 0.04) | 0.966         | 0.182     | 0.003  | 0.040    | 0.933      | -3.39e-03 (0.08, 0.08) | -0.000   | 0.027  | -0.040  | 0.037     | 0.275   | -0.04 (0.11, 0.03)     |                    |
| 4598.24                                                               | RSPD2    | RSPD2                     | 226  | -0.002   | 0.019  | 0.899           | -2.46e-03 (0.04, 0.04) | 0.966         | 0.182     | 0.003  | 0.040    | 0.933      | -3.39e-03 (0.08, 0.08) | -0.000   | 0.027  | -0.040  | 0.037     | 0.275   | -0.04 (0.11, 0.03)     |                    |
| 5743.82                                                               | CART3    | CART3                     | 226  | -0.002   | 0.019  | 0.899           | -2.46e-03 (0.04, 0.04) | 0.966         | 0.182     | 0.003  | 0.040    | 0.933      | -3.39e-03 (0.08, 0.08) | -0.000   | 0.027  | -0.040  | 0.037     | 0.275   | -0.04 (0.11, 0.03)     |                    |
| 6526.77                                                               | OBP2A    | OBP2A                     | 226  | -0.002   | 0.019  | 0.898           | -2.45e-03 (0.04, 0.03) | 0.966         | 0.165     | 0.007  | 0.040    | 0.899      | 0.01 (0.07, 0.09)      | -0.001   | 0.028  | -0.037  | 0.044     | 0.933   | -0.02 (0.10, 0.04)     |                    |
| 8242.9                                                                | CLCFLC1  | CLCFLC1                   | 226  | -0.002   | 0.019  | 0.898           | -2.45e-03 (0.04, 0.03) | 0.966         | 0.165     | 0.007  | 0.040    | 0.899      | 0.01 (0.07, 0.09)      | -0.001   | 0.028  | -0.037  | 0.044     | 0.933   | -0.02 (0.10, 0.04)     |                    |
| 8634.58                                                               | Calnexin | Calnexin                  | 226  | -0.002   | 0.019  | 0.898           | -2.45e-03 (0.04, 0.03) | 0.966         | 0.165     | 0.007  | 0.040    | 0.899      | 0.01 (0.07, 0.09)      | -0.001   | 0.028  | -0.037  | 0.044     | 0.933   | -0.02 (0.10, 0.04)     |                    |
| 13931.22                                                              | PANX1    | PANX1                     | 226  | -0.002   | 0.019  | 0.900           | -2.44e-03 (0.04, 0.04) | 0.966         | 0.805     | 0.001  | 0.039    | 0.986      | -6.61e-04 (0.08, 0.07) | 0.000    | 0.026  | 0.001   | 0.040     | 0.986   | 6.81e-04 (0.08, 0.07)  |                    |
| 17973.34                                                              | CAS9     | CAS9                      | 226  | -0.002   | 0.019  | 0.901           | -2.35e-03 (0.04, 0.04) | 0.966         | 0.729     | 0.004  | 0.038    | 0.955      | -0.02 (0.10, 0.05)     | 0.002    | 0.026  | 0.005   | 0.037     | 0.955   | -0.01 (0.08, 0.08)     |                    |
| 8269.327                                                              | ARSK     | ARSK                      | 226  | -0.003   | 0.024  | 0.901           | 2.97e-03 (0.04, 0.05)  | 0.966         | 4.11e-07  | 0.097  | 0.048    | 0.942      | 0.10 (0.13e-03, 0.19)  | -0.002   | 0.023  | -0.058  | 0.037     | 0.117   | 0.06 (0.11, 0.13)      |                    |
| 8599.147                                                              | ARLKB    | ARLKB                     | 226  | -0.003   | 0.024  | 0.901           | 2.97e-03 (0.04, 0.05)  | 0.966         | 4.11e-07  | 0.097  | 0.048    | 0.942      | 0.10 (0.13e-03, 0.19)  | -0.002   | 0.023  | -0.058  | 0.037     | 0.117   | 0.06 (0.11, 0.13)      |                    |
| 16756.30                                                              | GP77     | GP77                      | 226  | -0.002   | 0.020  | 0.902           | -2.39e-03 (0.04, 0.04) | 0.967         | 0.528     | 0.012  | 0.037    | 0.912      | -0.01 (0.09, 0.06)     | -0.004   | 0.016  | -0.028  | 0.035     | 0.448   | 0.03 (0.04, 0.1)       |                    |
| 17852.5                                                               | PPM1E    | PPM1E                     | 226  | -0.002   | 0.019  | 0.901           | -2.33e-03 (0.04, 0.03) | 0.966         | 0.755     | 0.006  | 0.038    | 0.881      | -0.01 (0.08, 0.07)     | -0.000   | 0.026  | 0.000   | 0.039     | 0.942   | 0.01 (0.08, 0.07)      |                    |
| 17852.5                                                               | PPM1E    | PPM1E                     | 226  | -0.002   | 0.019  | 0.901           | -2.33e-03 (0.04, 0.03) | 0.966         | 0.755     | 0.006  | 0.038    | 0.881      | -0.01 (0.08, 0.07)     | -0.000   | 0.026  | 0.000   | 0.039     | 0.942   | 0.01 (0.08, 0.07)      |                    |
| 17852.5                                                               | PPM1E    | PPM1E                     | 226  | -0.002   | 0.019  | 0.901           | -2.33e-03 (0.04, 0.03) | 0.966         | 0.755     | 0.006  | 0.038    | 0.881      | -0.01 (0.08, 0.07)     | -0.000   | 0.026  | 0.000   | 0.039     | 0.942   | 0.01 (0.08, 0.07)      |                    |
| 17781.19                                                              | GMPL7    | GMPL7                     | 226  | -0.003   | 0.021  | 0.903           | -2.52e-03 (0.04, 0.04) | 0.967         | 0.044     | -0.057 | 0.041    | 0.169      | -0.06 (0.14, 0.02)     | 0.003    | 0.010  | -0.053  | 0.031     | 0.084   | -0.05 (0.11, 0.01)     |                    |
| 12403.30                                                              | RAB39B   | RAB39B                    | 226  | -0.003   | 0.021  | 0.903           | -2.52e-03 (0.04, 0.04) | 0.968         | 0.023     | -0.028 | 0.042    | 0.538      | -0.03 (0.11, 0.06)     | 0.001    | 0.022  | -0.011  | 0.041     | 0.787   | -0.01 (0.08, 0.07)     |                    |
| 16482.1                                                               | HMDH3    | HMDH3                     | 226  | -0.002   | 0.020  | 0.904           | -2.35e-03 (0.04, 0.04) | 0.968         | 0.065     | 0.026  | 0.042    | 0.532      | 0.03 (0.08, 0.11)      | -0.001   | 0.022  | -0.004  | 0.040     | 0.723   | -0.01 (0.08, 0.07)     |                    |
| 2992.59                                                               | L17RA    | L17RA                     | 226  | -0.002   | 0.019  | 0.904           | -2.33e-03 (0.04, 0.04) | 0.968         | 0.423     | 0.003  | 0.039    | 0.930      | 3.48e-03 (0.07, 0.08)  | 0.000    | 0.026  | 0.000   | 0.038     | 0.938   | 0.318                  | 0.04 (0.10, 0.11)  |
| 9187.2                                                                | HMGN1    | HMGN1                     | 226  | -0.002   | 0.019  | 0.904           | -2.30e-03 (0.04, 0.04) | 0.968         | 0.162     | 0.000  | 0.040    | 0.990      | -4.89e-04 (0.08, 0.08) | -0.000   | 0.026  | 0.000   | 0.039     | 0.942   | 0.02 (0.05, 0.1)       |                    |
| 8412.52                                                               | ACVR2B   | ACVR2B                    | 226  | -0.002   | 0.021  | 0.903           | -2.57e-03 (0.04, 0.04) | 0.968         | 0.041     | 0.012  | 0.043    | 0.771      | 0.01 (0.07, 0.07)      | -0.001   | 0.026  | -0.001  | 0.040     | 0.912   | 0.01 (0.08, 0.1)       |                    |
| 19392.6                                                               | DOAH1    | DOAH1                     | 226  | -0.002   | 0.019  | 0.905           | -2.30e-03 (0.04, 0.04) | 0.968         | 0.420     | -0.001 | 0.039    | 0.891      | -8.26e-04 (0.08, 0.08) | -0.000   | 0.026  | -0.001  | 0.039     | 0.946   | -2.64e-03 (0.08, 0.08) |                    |
| 5183.53                                                               | PRKAA1   | PRKAA1                    | 226  | -0.002   | 0.019  | 0.906           | -2.27e-03 (0.04, 0.04) | 0.968         | 0.538     | 0.022  | 0.039    | 0.952      | 0.02 (0.05, 0.1)       | -0.001   | 0.026  | -0.001  | 0.040     | 0.985   | 0.01 (0.07, 0.07)      |                    |
| 6512.16                                                               | HINT2    | HINT2                     | 226  | -0.002   | 0.019  | 0.906           | -2.27e-03 (0.04, 0.04) | 0.968         | 0.538     | 0.022  | 0.039    | 0.952      | 0.02 (0.05, 0.1)       | -0.001   | 0.026  | -0.001  | 0.040     | 0.985   | 0.01 (0.07, 0.07)      |                    |
| 11513.92                                                              | CD38     | CD38                      | 226  | -0.002   | 0.019  | 0.906           | -2.27e-03 (0.04, 0.04) | 0.969         | 0.420     | -0.035 | 0.039    | 0.370      | -0.04 (0.11, 0.04)     | 0.002    | 0.026  | 0.002   | 0.034     | 0.984   | -0.01 (0.08, 0.07)     |                    |
| 10608.34                                                              | TOR1AIP1 | TOR1AIP1                  | 226  | -0.002   | 0.020  | 0.909           | -2.25e-03 (0.04, 0.04) | 0.969         | 0.014     | -0.038 | 0.040    | 0.337      | -0.04 (0.12, 0.04)     | 0.003    | 0.024  | 0.029   | 0.041     | 0.944   | -0.04 (0.10, 0.07)     |                    |
| 12943.6                                                               | ZNF140   | ZNF140                    | 226  | -0.002   | 0.019  | 0.909           | -2.25e-03 (0.04, 0.04) | 0.969         | 0.376     | 0.009  | 0.039    | 0.929      | 0.01 (0.07, 0.07)      | -0.000   | 0.026  | -0.001  | 0.039     | 0.952   | 0.01 (0.07, 0.07)      |                    |
| 13449.25                                                              | SFR3A    | SFR3A                     | 226  | -0.002   | 0.019  | 0.909           | -2.25e-03 (0.04, 0.04) | 0.969         | 0.376     | 0.009  | 0.039    | 0.929      | 0.01 (0.07, 0.07)      | -0.000   | 0.026  | -0.001  | 0.039     | 0.952   | 0.01 (0.07, 0.07)      |                    |
| 14291.09                                                              | TRAF3IP1 | TRAF3IP1                  | 226  | -0.002   | 0.019  | 0.909           | -2.25e-03 (0.04, 0.04) | 0.969         | 0.376     | 0.009  | 0.039    | 0.929      | 0.01 (0.07, 0.07)      | -0.000   | 0.026  | -0.001  | 0.039     | 0.952   | 0.01 (0.07, 0.07)      |                    |
| 14061.48                                                              | ITRAF1   | ITRAF1                    | 226  | -0.002   | 0.020  | 0.909           | -2.24e-03 (0.04, 0.04) | 0.969         | 0.465     | 0.002  | 0.040    | 0.951      | 2.44e-03 (0.08, 0.08)  | 0.000    | 0.026  | 0.000   | 0.040     | 0.942   | 0.02 (0.05, 0.1)       |                    |
| 14129.1                                                               | FNRF1    | FNRF1                     | 226  | -0.002   | 0.020  | 0.908           | -2.29e-03 (0.04, 0.04) | 0.969         | 0.225     | 0.012  | 0.041    | 0.771      | 0.01 (0.07, 0.09)      | -0.001   | 0.026  | -0.001  | 0.040     | 0.923   | 0.04 (0.03, 0.09)      |                    |
| 14523.28                                                              | SUMO3    | SUMO3                     | 226  | -0.002   | 0.020  | 0.908           | -2.29e-03 (0.04, 0.04) | 0.969         | 0.225     | 0.012  | 0.041    | 0.771      | 0.01 (0.07, 0.09)      | -0.001   | 0.026  | -0.001  | 0.040     | 0.923   | 0.04 (0.03, 0.09)      |                    |
| 17483.3                                                               | ARHGAP5  | ARHGAP5                   | 226  | -0.002   | 0.018  | 0.907           | -2.10e-03 (0.04, 0.03) | 0.969         | 0.709     | 0.018  | 0.036    | 0.619      | 0.02 (0.09, 0.05)      | -0.001   | 0.026  | -0.001  | 0.036     | 0.930   | 0.130                  | -0.05 (0.11, 0.01) |
| 18746.31                                                              | RBP4     | RBP4                      | 226  | -0.003   | 0.022  | 0.908           | -2.55e-03 (0.05, 0.04) | 0.969         | 1.140e-05 | 0.036  | 0.044    | 0.418      | 0.04 (0.05, 0.12)      | -0.002   | 0.026  | -0.002  | 0.039     | 0.952   | 0.01 (0.08, 0.07)      |                    |
| 19551.216                                                             | PLKND1   | PLKND1                    | 226  | -0.002   | 0.019  | 0.904           | -2.17e-03 (0.04, 0.04) | 0.969         | 0.275     | 0.043  | 0.040    | 0.827      | 0.01 (0.07, 0.07)      | -0.001   | 0.026  | -0.001  | 0.040     | 0.929   | 0.02 (0.05, 0.1)       |                    |
| 3312.54                                                               | FCGR1A   | FCGR1A                    | 226  | -0.002   | 0.019  | 0.907           | -2.21e-03 (0.04, 0.04) | 0.969         | 0.135     | 0.030  | 0.040    | 0.450      | 0.03 (0.05, 0.11)      | -0.002   | 0.021  | -0.012  | 0.037     | 0.745   | -0.01 (0.08, 0.07)     |                    |
| 7208.60                                                               | ARSL4C4  | ARSL4C4                   | 226  | -0.002   | 0.019  | 0.909           | -2.19e-03 (0.04, 0.04) | 0.969         | 0.396     | 0.010  | 0.039    | 0.650      | 0.02 (0.07, 0.09)      | -0.001   | 0.026  | -0.001  | 0.040     | 0.935   | 0.160                  | 0.05 (0.12, 0.02)  |
| 7835.2                                                                | BNIP1    | BNIP1                     | 226  | -0.002   | 0.019  | 0.909           | -2.19e-03 (0.04, 0.04) | 0.969         | 0.396     | 0.010  | 0.039    | 0.650      | 0.02 (0.07, 0.09)      | -0.001   | 0.026  | -0.001  | 0.040     | 0.935   | 0.160                  | 0.05 (0.12, 0.02)  |
| 8382.10                                                               | MRPL3    | MRPL3                     | 226  | -0.002   | 0.020  | 0.907           | -2.27e-03 (0.04, 0.04) | 0.969         | 0.886     | 0.040  | 0.039    | 0.311      | 0.04 (0.12, 0.05)      | -0.003   | 0.021  | -0.033  | 0.035     | 0.214   | 0.04 (0.10, 0.11)      |                    |
| 8382.10                                                               | MRPL3    | MRPL3                     | 226  | -0.002   | 0.020  | 0.907           | -2.27e-03 (0.04, 0.04) | 0.969         | 0.886     | 0.040  | 0.039    | 0.311      | 0.04 (0.12, 0.05)      | -0.003   | 0.021  | -0.033  | 0.035     | 0.214   | 0.04 (0.10, 0.11)      |                    |
| 8382.10                                                               | MRPL3    | MRPL3                     | 226  | -0.002   | 0.020  | 0.907           | -2.27e-03 (0.04, 0.04) | 0.969         | 0.886     | 0.040  | 0.039    | 0.311      | 0.04 (0.12, 0.05)      | -0.003   | 0.021  | -0.033  | 0.035     | 0.214   | 0.04 (0.10, 0.11)      |                    |
| 8598.30                                                               | PER1     | PER1                      | 226  | -0.002   | 0.018  | 0.908           | -2.14e-03 (0.04, 0.03) | 0.969         | 0.396     |        |          |            |                        |          |        |         |           |         |                        |                    |

Table S5. Association of type 2 diabetes with Finland plasma protein.

| SomaLogic | Protein | rnp        | b/w | Inverse variance weighted |          | MR Egger |                       | Weighted median |          | Weighted mode |           |       |                    |
|-----------|---------|------------|-----|---------------------------|----------|----------|-----------------------|-----------------|----------|---------------|-----------|-------|--------------------|
|           |         |            |     | se,ivw                    | pval,ivw | CI_low   | CI_high               | se,ivw          | pval,ivw | se,mode       | pval,mode |       |                    |
| 13374.4   | DEFB13  | DB13       | 1   | 0.001                     | 0.019    | 0.849    | 1.25e-03 (0.04, 0.04) | 0.881           | 0.362    | 0.024         | 0.440     | 0.022 | 0.05 (0.10, 0.10)  |
| 17320.3   | S10A10  | CD141      | 1   | 0.001                     | 0.019    | 0.849    | 1.25e-03 (0.04, 0.04) | 0.881           | 0.362    | 0.024         | 0.440     | 0.022 | 0.05 (0.10, 0.10)  |
| 18165.1   | UBR2    | UBR2       | 1   | 0.001                     | 0.019    | 0.849    | 1.25e-03 (0.04, 0.04) | 0.881           | 0.362    | 0.024         | 0.440     | 0.022 | 0.05 (0.10, 0.10)  |
| 19306.20  | IGJ     | IGJ        | 1   | 0.001                     | 0.019    | 0.849    | 1.25e-03 (0.04, 0.04) | 0.881           | 0.362    | 0.024         | 0.440     | 0.022 | 0.05 (0.10, 0.10)  |
| 16748.12  | RHBB    | RHBB       | 1   | 0.001                     | 0.019    | 0.849    | 1.25e-03 (0.04, 0.04) | 0.881           | 0.362    | 0.024         | 0.440     | 0.022 | 0.05 (0.10, 0.10)  |
| 2627.23   | LCR1L   | Fractalkin | 1   | 0.001                     | 0.019    | 0.849    | 1.25e-03 (0.04, 0.04) | 0.881           | 0.362    | 0.024         | 0.440     | 0.022 | 0.05 (0.10, 0.10)  |
| 5091.28   | LYR2    | IL-4       | 1   | 0.001                     | 0.022    | 0.851    | 1.36e-03 (0.04, 0.04) | 0.882           | 0.001    | 0.036         | 0.048     | 0.046 | 0.022 (0.06, 0.06) |
| 5096.75   | CD5     | CD5        | 1   | 0.001                     | 0.019    | 0.849    | 1.25e-03 (0.04, 0.04) | 0.881           | 0.362    | 0.024         | 0.440     | 0.022 | 0.05 (0.10, 0.10)  |
| 5969.10   | NM1     | Nucleoside | 1   | 0.001                     | 0.019    | 0.849    | 1.25e-03 (0.04, 0.04) | 0.881           | 0.362    | 0.024         | 0.440     | 0.022 | 0.05 (0.10, 0.10)  |
| 8838.10   | CASCA   | CASCA      | 1   | 0.002                     | 0.037    | 0.851    | 2.27e-03 (0.07, 0.07) | 0.882           | 6.99e-77 | 0.019         | 0.074     | 0.004 | 0.033 (0.09, 0.09) |
| 9234.45   | MFAP2   | MFAP2      | 1   | 0.001                     | 0.019    | 0.849    | 1.25e-03 (0.04, 0.04) | 0.881           | 0.362    | 0.024         | 0.440     | 0.022 | 0.05 (0.10, 0.10)  |
| 9582.93   | SUSD1   | SUSD1      | 1   | 0.001                     | 0.020    | 0.850    | 1.22e-03 (0.04, 0.04) | 0.882           | 0.129    | 0.007         | 0.042     | 0.070 | 0.011 (0.07, 0.07) |
| 12295.86  | DAR32   | SYND       | 1   | 0.001                     | 0.018    | 0.851    | 1.10e-03 (0.04, 0.04) | 0.882           | 0.133    | -0.020        | 0.038     | 0.067 | 0.022 (0.09, 0.09) |
| 1865.60   | SNR1P   | SNR1P      | 1   | 0.001                     | 0.019    | 0.849    | 1.25e-03 (0.04, 0.04) | 0.881           | 0.362    | 0.024         | 0.440     | 0.022 | 0.05 (0.10, 0.10)  |
| 17337.1   | YY1     | YY1        | 1   | 0.001                     | 0.018    | 0.853    | 1.10e-03 (0.04, 0.04) | 0.883           | 0.327    | -0.045        | 0.038     | 0.232 | 0.05 (0.10, 0.10)  |
| 2647.56   | GDI2    | Flav-GDP-P | 1   | 0.001                     | 0.018    | 0.853    | 1.03e-03 (0.04, 0.04) | 0.883           | 0.620    | -0.028        | 0.035     | 0.422 | 0.03 (0.10, 0.10)  |
| 6433.57   | FAM20A  | FAM20A     | 1   | 0.001                     | 0.019    | 0.853    | 1.03e-03 (0.04, 0.04) | 0.883           | 0.165    | 0.000         | 0.038     | 0.299 | 0.04 (0.10, 0.10)  |
| 11231.12  | FDX1L   | ADXL       | 1   | 0.001                     | 0.019    | 0.854    | 1.11e-03 (0.04, 0.04) | 0.884           | 0.882    | 0.040         | 0.039     | 0.306 | 0.04 (0.10, 0.10)  |
| 11096.57  | NM1T1   | NM1T1      | 1   | 0.001                     | 0.019    | 0.854    | 1.10e-03 (0.04, 0.04) | 0.884           | 0.004    | -0.024        | 0.038     | 0.554 | 0.02 (0.10, 0.10)  |
| 17450.51  | HARS    | HuH4yJRN   | 1   | 0.001                     | 0.019    | 0.855    | 1.05e-03 (0.04, 0.04) | 0.884           | 0.654    | 0.001         | 0.038     | 0.986 | 0.04 (0.10, 0.10)  |
| 15299.102 | MESDC2  | MESDC2     | 1   | 0.001                     | 0.018    | 0.856    | 9.92e-04 (0.04, 0.04) | 0.885           | 0.701    | -0.022        | 0.038     | 0.545 | 0.02 (0.09, 0.09)  |
| 5213.35   | ND1     | NM1T1      | 1   | 0.001                     | 0.019    | 0.856    | 9.97e-04 (0.04, 0.04) | 0.885           | 0.105    | -0.045        | 0.038     | 0.228 | 0.04 (0.10, 0.10)  |
| 9176.3    | MUC1    | MUC1       | 1   | 0.001                     | 0.021    | 0.856    | 1.17e-03 (0.04, 0.04) | 0.885           | 0.018    | 0.017         | 0.042     | 0.097 | 0.07 (0.15, 0.15)  |
| 19289.29  | UROD    | DCUP       | 1   | 0.001                     | 0.019    | 0.857    | 1.05e-03 (0.04, 0.04) | 0.885           | 0.728    | -0.028        | 0.039     | 0.467 | 0.03 (0.10, 0.10)  |
| 12033.54  | HEM2    | HEM2       | 1   | 0.001                     | 0.019    | 0.857    | 9.97e-04 (0.04, 0.04) | 0.885           | 0.246    | 0.039         | 0.050     | 0.104 | 0.04 (0.11, 0.11)  |
| 18613.3   | CDM1T   | CAD17      | 1   | 0.001                     | 0.024    | 0.857    | 1.28e-03 (0.05, 0.05) | 0.885           | 1.18e-06 | 0.058         | 0.048     | 0.255 | 0.05 (0.14, 0.14)  |
| 17335.18  | VAMP2   | VAMP2      | 1   | 0.001                     | 0.020    | 0.857    | 1.05e-03 (0.04, 0.04) | 0.885           | 0.465    | -0.035        | 0.039     | 0.382 | 0.03 (0.11, 0.11)  |
| 19033.64  | PET117  | PET117     | 1   | 0.001                     | 0.019    | 0.858    | 1.13e-03 (0.04, 0.04) | 0.885           | 0.073    | 0.004         | 0.042     | 0.821 | 0.06 (0.08, 0.08)  |
| 19560.23  | PANP    | PLX4       | 1   | 0.001                     | 0.022    | 0.858    | 1.17e-03 (0.04, 0.04) | 0.886           | 2.40e-05 | 0.007         | 0.045     | 0.875 | 0.01 (0.08, 0.10)  |
| 2819.50   | BCAM    | BCAM       | 1   | 0.001                     | 0.027    | 0.858    | 1.42e-03 (0.05, 0.05) | 0.886           | 1.11e-19 | 0.013         | 0.055     | 0.818 | 0.01 (0.09, 0.12)  |
| 14345.4   | PNP     | PNP        | 1   | 0.001                     | 0.019    | 0.858    | 1.13e-03 (0.04, 0.04) | 0.886           | 0.049    | 0.018         | 0.041     | 0.821 | 0.06 (0.08, 0.08)  |
| 17797.1   | CUL1    | CUL1       | 1   | 0.001                     | 0.019    | 0.859    | 9.74e-04 (0.04, 0.04) | 0.886           | 0.495    | 0.043         | 0.038     | 0.285 | 0.04 (0.10, 0.12)  |
| 3434.54   | FN1     | FN1        | 1   | 0.001                     | 0.019    | 0.859    | 9.82e-04 (0.04, 0.04) | 0.886           | 0.841    | 0.048         | 0.039     | 0.881 | 0.01 (0.07, 0.08)  |
| 6940.18   | CPH3    | CPH3       | 1   | 0.001                     | 0.019    | 0.859    | 9.82e-04 (0.04, 0.04) | 0.886           | 0.414    | 0.004         | 0.038     | 0.881 | 0.01 (0.07, 0.08)  |
| 8019.43   | V5C2    | V5C2       | 1   | 0.001                     | 0.019    | 0.859    | 9.82e-04 (0.04, 0.04) | 0.886           | 0.813    | 0.043         | 0.038     | 0.281 | 0.04 (0.12, 0.13)  |
| 3040.59   | JPH1    | JPH1       | 1   | 0.001                     | 0.019    | 0.859    | 9.82e-04 (0.04, 0.04) | 0.886           | 0.813    | 0.043         | 0.038     | 0.281 | 0.04 (0.12, 0.13)  |
| 4440.8    | PDPK1   | PDPK1      | 1   | 0.001                     | 0.018    | 0.860    | 9.11e-04 (0.04, 0.04) | 0.886           | 0.586    | 0.012         | 0.038     | 0.736 | 0.01 (0.08, 0.08)  |
| 10613.33  | CASCA   | CASCA      | 1   | 0.002                     | 0.040    | 0.863    | 1.88e-03 (0.08, 0.08) | 0.886           | 2.77e-11 | -0.012        | 0.080     | 0.878 | 0.01 (0.17, 0.14)  |
| 13303.5   | SEC7M1  | SEC7M1     | 1   | 0.001                     | 0.019    | 0.863    | 1.14e-03 (0.04, 0.04) | 0.886           | 0.428    | 0.003         | 0.041     | 0.821 | 0.06 (0.11, 0.11)  |
| 17320.19  | AASBP   | AASBP      | 1   | 0.001                     | 0.018    | 0.863    | 8.61e-04 (0.04, 0.04) | 0.886           | 0.762    | 0.002         | 0.037     | 0.987 | 0.15 (0.07, 0.07)  |
| 17336.54  | CR2L2   | CR2L2      | 1   | 0.001                     | 0.020    | 0.862    | 9.37e-04 (0.04, 0.04) | 0.886           | 0.484    | 0.070         | 0.039     | 0.977 | 0.07 (0.19, 0.15)  |
| 18290.5   | ANKK4   | ANKK4      | 1   | 0.001                     | 0.019    | 0.862    | 9.37e-04 (0.04, 0.04) | 0.886           | 0.209    | 0.009         | 0.038     | 0.987 | 0.01 (0.06, 0.06)  |
| 19590.46  | SFP2    | SFP2       | 1   | 0.001                     | 0.022    | 0.862    | 1.06e-03 (0.04, 0.04) | 0.886           | 0.001    | -0.039        | 0.045     | 0.377 | 0.04 (0.13, 0.15)  |
| 4382.54   | FGF12   | FGF12      | 1   | 0.001                     | 0.019    | 0.861    | 9.14e-04 (0.04, 0.04) | 0.886           | 0.067    | 0.049         | 0.040     | 0.225 | 0.05 (0.13, 0.13)  |
| 7090.17   | GALNT1  | GALNT1     | 1   | 0.001                     | 0.019    | 0.861    | 9.07e-03 (0.04, 0.04) | 0.886           | 0.405    | 0.017         | 0.044     | 0.172 | 0.02 (0.10, 0.11)  |
| 7105.7    | SCARB2  | CABL2      | 1   | 0.001                     | 0.018    | 0.861    | 8.94e-04 (0.04, 0.04) | 0.886           | 0.594    | -0.042        | 0.037     | 0.253 | 0.04 (0.11, 0.13)  |
| 9600.55   | THSD7A  | THSD7A     | 1   | 0.001                     | 0.020    | 0.862    | 9.30e-04 (0.04, 0.04) | 0.886           | 0.523    | 0.133         | 0.040     | 0.752 | 0.01 (0.06, 0.09)  |
| 9625.56   | CLARET  | CLARET     | 1   | 0.001                     | 0.019    | 0.862    | 9.30e-04 (0.04, 0.04) | 0.886           | 0.256    | 0.047         | 0.038     | 0.621 | 0.02 (0.09, 0.07)  |
| 13984.23  | DDX25   | DDX25      | 1   | 0.001                     | 0.019    | 0.863    | 8.86e-04 (0.04, 0.04) | 0.887           | 0.369    | 0.035         | 0.039     | 0.372 | 0.04 (0.11, 0.11)  |
| 9907.216  | TNKS    | Tanycytes  | 1   | 0.001                     | 0.019    | 0.863    | 8.86e-04 (0.04, 0.04) | 0.887           | 0.563    | 0.038         | 0.039     | 0.855 | 0.01 (0.07, 0.08)  |
| 16330.7   | PSM2    | PSM2       | 1   | 0.001                     | 0.019    | 0.863    | 8.86e-04 (0.04, 0.04) | 0.887           | 0.894    | 0.037         | 0.039     | 0.855 | 0.01 (0.07, 0.08)  |
| 18678.15  | GREM1   | GREM1      | 1   | 0.001                     | 0.023    | 0.864    | 1.03e-03 (0.04, 0.05) | 0.887           | 1.70e-04 | -0.012        | 0.045     | 0.791 | 0.01 (0.10, 0.18)  |
| 18696.25  | CLRN3   | CLRN3      | 1   | 0.001                     | 0.018    | 0.864    | 8.59e-04 (0.04, 0.04) | 0.887           | 0.885    | 0.036         | 0.041     | 0.848 | 0.02 (0.06, 0.07)  |
| 5749.53   | LGPS    | LGPS       | 1   | 0.001                     | 0.023    | 0.865    | 1.00e-03 (0.04, 0.05) | 0.887           | 0.864    | 0.096         | 0.045     | 0.036 | 0.10 (0.10, 0.18)  |
| 8479.4    | MLP10   | MLP10      | 1   | 0.001                     | 0.021    | 0.865    | 8.31e-04 (0.04, 0.04) | 0.888           | 0.120    | 0.006         | 0.041     | 0.881 | 0.01 (0.07, 0.09)  |
| 9012.22   | CTSF    | CTSF       | 1   | 0.001                     | 0.019    | 0.865    | 8.31e-04 (0.04, 0.04) | 0.888           | 0.004    | -0.039        | 0.041     | 0.881 | 0.01 (0.07, 0.09)  |
| 3038.9    | ITAC    | ITAC       | 1   | 0.001                     | 0.021    | 0.866    | 8.79e-04 (0.04, 0.04) | 0.888           | 0.006    | 0.011         | 0.042     | 0.790 | 0.01 (0.09, 0.07)  |
| 3603.80   | CLCTA   | CLCTA      | 1   | 0.001                     | 0.020    | 0.866    | 8.51e-04 (0.04, 0.04) | 0.888           | 0.007    | 0.019         | 0.040     | 0.635 | 0.02 (0.06, 0.10)  |
| 6040.10   | RSPD1   | RSPD1      | 1   | 0.001                     | 0.019    | 0.866    | 8.51e-04 (0.04, 0.04) | 0.888           | 0.004    | -0.039        | 0.041     | 0.881 | 0.01 (0.07, 0.09)  |
| 7779.86   | CHST1   | CHST1      | 1   | 0.001                     | 0.030    | 0.866    | 1.29e-03 (0.06, 0.06) | 0.888           | 4.47e-33 | 0.026         | 0.061     | 0.670 | 0.03 (0.15, 0.19)  |
| 17403.14  | AGTR8   | lyso-GD3   | 1   | 0.001                     | 0.019    | 0.867    | 7.55e-04 (0.04, 0.04) | 0.888           | 0.057    | 0.007         | 0.040     | 0.863 | 0.01 (0.07, 0.09)  |
| 18327.5   | SNXS    | SNXS       | 1   | 0.001                     | 0.020    | 0.867    | 9.47e-04 (0.04, 0.04) | 0.888           | 0.524    | 0.037         | 0.041     | 0.863 | 0.02 (0.06, 0.07)  |
| 19817.5   | PTGSR   | lyso-GD3   | 1   | 0.001                     | 0.019    | 0.867    | 7.92e-04 (0.04, 0.04) | 0.888           | 0.050    | -0.037        | 0.042     | 0.376 | 0.04 (0.12, 0.14)  |
| 4993.16   | GSTA3   | GSTA3      | 1   | 0.001                     | 0.020    | 0.868    | 7.94e-04 (0.04, 0.04) | 0.888           | 0.174    | -0.005        | 0.041     | 0.910 | 0.06 (0.09, 0.08)  |
| 5319.58   | TMED4   | TMED4      | 1   | 0.001                     | 0.019    | 0.868    | 7.94e-04 (0.04, 0.04) | 0.888           | 0.304    | 0.041         | 0.040     | 0.863 | 0.01 (0.07, 0.09)  |
| 3346.72   | AURKB   | AURKB      | 1   | 0.001                     | 0.019    | 0.869    | 7.86e-04 (0.04, 0.04) | 0.889           | 0.364    | -0.040        | 0.040     | 0.910 | 0.04 (0.12, 0.14)  |
| 10580.14  | SFTA2   | SFTA2      | 1   | 0.001                     | 0.019    | 0.869    | 7.86e-04 (0.04, 0.04) | 0.889           | 0.603    | 0.032         | 0.041     | 0.910 | 0.04 (0.12, 0.14)  |
| 15164.16  | SLC42A2 | SLC42A2    | 1   | 0.001                     | 0.019    | 0.869    | 7.86e-04 (0.04, 0.04) | 0.889           | 0.230    | 0.022         | 0.039     | 0.863 | 0.02 (0.09, 0.07)  |
| 17355.56  | SYT4    | SYT4       | 1   | 0.001                     | 0.018    | 0.870    | 6.76e-04 (0.04, 0.04) | 0.889           | 0.633    | -0.042        | 0.038     | 0.248 | 0.04 (0.11, 0.13)  |
| 12532.28  | CDCA4   | UBR1       | 1   | 0.001                     | 0.019    | 0.870    | 7.30e-04 (0.04, 0.04) | 0.889           | 0.862    | 0.049         | 0.040     | 0.863 | 0.04 (0.12, 0.14)  |
| 18622.2   | QDNF    | QDNF       | 1   | 0.001                     | 0.019    | 0.869    | 8.59e-04 (0.04, 0.04) | 0.889           | 0.903    | 0.032         | 0.039     | 0.863 | 0.02 (0.09, 0.07)  |
| 9116.28   | HPCAD3  | HECA2      | 1   | 0.001                     | 0.019    | 0.871    | 7.09e-04 (0.04, 0.04) | 0.890           | 0.296    | -0.055        | 0.040     | 0.170 | 0.05 (0.13, 0.13)  |
| 9027.36   | TPK3    | TPK3       | 1   | 0.001                     | 0.019    | 0.871    | 7.09e-04 (0.04, 0.04) | 0.890           | 0.807    | 0.037         | 0.040     | 0.863 | 0.01 (0.07, 0.09)  |
| 6447.73   | PTX3    | PTX3       | 1   | 0.001                     | 0.022    | 0.872    | 7.87e-04 (0.04, 0.04) | 0.890           | 0.009    | 0.035         | 0.044     | 0.421 | 0.04 (0.12, 0.15)  |
| 8045.27   | GPX7</  |            |     |                           |          |          |                       |                 |          |               |           |       |                    |



Table S6. Association of putative type 2 diabetes-associated proteins in deCODE with gastrointestinal diseases.

| Index SNP   | Somalogic | UniProt | Gene     | GI outcomes                            | FDR      | b      | se    | pval     | OR (95% CI)      | snp_r2.exposure | snp_r2.outcome | correct_causal_direction | steiger_pval |
|-------------|-----------|---------|----------|----------------------------------------|----------|--------|-------|----------|------------------|-----------------|----------------|--------------------------|--------------|
| rs1229984   | 9834_62   | P00325  | ADH1B    | Cirrhosis                              | 0.003    | 0.719  | 0.183 | 8.99E-05 | 2.05 (1.43,2.94) | 0.001           | 1.97E-05       | TRUE                     | 2.17E-09     |
| rs2602844   | 8325_37   | P08319  | ADH4     | Cholelithiasis                         | 0.017    | 0.229  | 0.067 | 0.001    | 1.26 (1.01,1.23) | 0.005           | 1.47E-05       | TRUE                     | 6.15E-34     |
| rs35246623  | 4435_66   | Q6UWU6  | ENPP7    | Cholelithiasis                         | 0.013    | 0.038  | 0.011 | 4.19E-04 | 1.04 (1.02,1.06) | 0.025           | 1.60E-05       | TRUE                     | 2.00E-183    |
| rs10952549  | 3431_54   | P21709  | EPHA1    | Cholecystitis                          | 0.036    | -0.140 | 0.043 | 0.001    | 0.87 (0.80,0.95) | 0.025           | 1.46E-05       | TRUE                     | 2.28E-183    |
| rs34356500  | 15562_24  | P08236  | GUSB     | Nonalcoholic fatty liver disease       | 0.003    | 0.654  | 0.167 | 8.61E-05 | 1.92 (1.39,2.67) | 0.008           | 1.98E-05       | TRUE                     | 3.42E-56     |
| rs11809759  | 10462_14  | P00325  | ADH1B    | Gastric ulcer                          | 0.020    | -0.941 | 0.261 | 3.18E-04 | 0.39 (0.23,0.65) | 0.008           | 1.88E-05       | TRUE                     | 9.57E-10     |
| rs2228603   | 15573_110 | O14594  | NCAN     | Nonalcoholic fatty liver disease       | 8.58E-17 | -1.092 | 0.124 | 1.34E-18 | 0.34 (0.26,0.43) | 0.012           | 9.93E-05       | TRUE                     | 1.06E-74     |
| rs2228603   | 15573_110 | O14592  | NCAN     | Cirrhosis                              | 1.18E-08 | -0.625 | 0.187 | 1.85E-10 | 0.54 (0.44,0.68) | 0.012           | 5.21E-05       | TRUE                     | 6.80E-59     |
| rs1212100   | 9829_91   | Q06520  | SULT2A1  | Cholelithiasis                         | 8.19E-44 | 0.683  | 0.048 | 1.28E-45 | 1.98 (1.80,2.18) | 0.011           | 2.62E-04       | TRUE                     | 8.04E-61     |
| rs1212100   | 9829_91   | Q06520  | SULT2A1  | Cholecystitis                          | 0.036    | 0.374  | 0.111 | 0.001    | 1.45 (1.17,1.81) | 0.011           | 1.54E-05       | TRUE                     | 6.07E-78     |
| rs35894069  | 5939_42   | O43508  | TNFSF12  | Diverticular disease                   | 0.018    | 0.102  | 0.028 | 2.78E-04 | 1.11 (1.05,1.17) | 0.025           | 1.92E-05       | TRUE                     | 1.20E-181    |
| rs10403399  | 3232_28   | P13686  | ACPF5    | Chronic gastritis (Atrophic gastritis) | 0.192    | 0.218  | 0.073 | 0.003    | 1.24 (1.08,1.43) | 0.018           | 1.27E-05       | TRUE                     | 7.49E-127    |
| rs10403399  | 3232_28   | P13686  | ACPF5    | Cholecystitis                          | 0.666    | -0.138 | 0.084 | 0.100    | 0.87 (0.74,1.03) | 0.018           | 3.69E-06       | TRUE                     | 3.35E-130    |
| rs10403399  | 3232_28   | P13686  | ACPF5    | Nonalcoholic fatty liver disease       | 0.795    | -0.138 | 0.112 | 0.218    | 0.97 (0.89,1.05) | 0.018           | 1.95E-06       | TRUE                     | 1.29E-131    |
| rs10403399  | 3232_28   | P13686  | ACPF5    | Cholelithiasis                         | 0.788    | -0.034 | 0.035 | 0.341    | 0.97 (0.90,1.04) | 0.018           | 1.18E-06       | TRUE                     | 3.99E-132    |
| rs10403399  | 3232_28   | P13686  | ACPF5    | Gastric ulcer                          | 0.849    | -0.054 | 0.071 | 0.451    | 0.95 (0.82,1.09) | 0.018           | 8.20E-07       | TRUE                     | 7.07E-132    |
| rs10403399  | 3232_28   | P13686  | ACPF5    | Acute gastritis                        | 0.939    | 0.149  | 0.118 | 0.209    | 1.16 (0.92,1.46) | 0.018           | 2.25E-06       | TRUE                     | 8.70E-131    |
| rs10403399  | 3232_28   | P13686  | ACPF5    | Gastroesophageal reflux disease        | 0.949    | 0.015  | 0.037 | 0.682    | 1.02 (0.94,1.09) | 0.018           | 2.26E-07       | TRUE                     | 4.93E-133    |
| rs10403399  | 3232_28   | P13686  | ACPF5    | Irritable bowel syndrome               | 0.993    | 0.020  | 0.060 | 0.732    | 1.02 (0.91,1.15) | 0.018           | 1.85E-07       | TRUE                     | 2.15E-132    |
| rs10403399  | 3232_28   | P13686  | ACPF5    | Diverticular disease                   | 1.000    | 0.000  | 0.033 | 1.000    | 1.00 (0.94,1.07) | 0.018           | 5.65E-11       | TRUE                     | 1.21E-133    |
| rs10403399  | 3232_28   | P13686  | ACPF5    | Cirrhosis                              | 1.000    | 0.009  | 0.085 | 0.920    | 1.01 (0.85,1.19) | 0.018           | 1.32E-08       | TRUE                     | 3.87E-134    |
| rs148804382 | 3343_1    | Q03154  | ACY1     | Diverticular disease                   | 0.238    | 0.101  | 0.045 | 0.025    | 1.11 (1.01,1.21) | 0.014           | 7.22E-06       | TRUE                     | 6.78E-103    |
| rs148804382 | 3343_1    | Q03154  | ACY1     | Cholelithiasis                         | 0.582    | 0.084  | 0.050 | 0.091    | 1.09 (0.99,1.20) | 0.014           | 3.70E-06       | TRUE                     | 1.01E-104    |
| rs148804382 | 3343_1    | Q03154  | ACY1     | Gastroesophageal reflux disease        | 0.773    | 0.043  | 0.052 | 0.410    | 1.04 (0.94,1.16) | 0.014           | 9.34E-07       | TRUE                     | 3.97E-106    |
| rs148804382 | 3343_1    | Q03154  | ACY1     | Cholecystitis                          | 0.847    | 0.021  | 0.021 | 0.929    | 1.02 (0.95,1.23) | 0.014           | 6.75E-08       | TRUE                     | 4.43E-101    |
| rs148804382 | 3343_1    | Q03154  | ACY1     | Acute gastritis                        | 0.964    | 0.034  | 0.164 | 0.838    | 1.03 (0.75,1.43) | 0.014           | 5.94E-08       | TRUE                     | 3.33E-107    |
| rs148804382 | 3343_1    | Q03154  | ACY1     | Cirrhosis                              | 1.000    | -0.111 | 0.115 | 0.338    | 0.90 (0.71,1.12) | 0.014           | 1.18E-06       | TRUE                     | 3.13E-106    |
| rs148804382 | 3343_1    | Q03154  | ACY1     | Nonalcoholic fatty liver disease       | 0.981    | 0.031  | 0.151 | 0.839    | 1.03 (0.77,1.39) | 0.014           | 5.29E-08       | TRUE                     | 9.89E-108    |
| rs148804382 | 3343_1    | Q03154  | ACY1     | Chronic gastritis (Atrophic gastritis) | 0.993    | 0.014  | 0.116 | 0.906    | 1.01 (0.81,1.27) | 0.014           | 1.99E-08       | TRUE                     | 1.98E-107    |
| rs148804382 | 3343_1    | Q03154  | ACY1     | Irritable bowel syndrome               | -0.002   | 0.052  | 0.082 | 0.855    | 0.95 (0.85,1.07) | 0.014           | 1.11E-10       | TRUE                     | 3.20E-107    |
| rs148804382 | 3343_1    | Q03154  | ACY1     | Cholecystitis                          | 0.983    | 0.024  | 0.115 | 0.835    | 1.02 (0.82,1.28) | 0.014           | 5.97E-08       | TRUE                     | 2.16E-107    |
| rs11534419  | 6379_62   | Q86TH1  | ADAMTSL2 | Gastroesophageal reflux disease        | 0.773    | 0.070  | 0.071 | 0.323    | 1.07 (0.93,1.23) | 0.005           | 1.36E-06       | TRUE                     | 7.56E-35     |
| rs11534419  | 6379_62   | Q86TH1  | ADAMTSL2 | Gastric ulcer                          | 0.741    | -0.131 | 0.133 | 0.324    | 0.88 (0.68,1.14) | 0.005           | 1.40E-06       | TRUE                     | 9.46E-35     |
| rs11534419  | 6379_62   | Q86TH1  | ADAMTSL2 | Cirrhosis                              | 0.798    | -0.242 | 0.160 | 0.131    | 0.79 (0.57,1.07) | 0.005           | 2.91E-06       | TRUE                     | 2.06E-34     |
| rs11534419  | 6379_62   | Q86TH1  | ADAMTSL2 | Cholelithiasis                         | 0.823    | -0.041 | 0.066 | 0.534    | 0.96 (0.84,1.09) | 0.005           | 5.15E-07       | TRUE                     | 2.22E-35     |
| rs11534419  | 6379_62   | Q86TH1  | ADAMTSL2 | Cholecystitis (Atrophic gastritis)     | 0.841    | -0.173 | 0.107 | 0.193    | 0.81 (0.65,1.01) | 0.005           | 1.32E-06       | TRUE                     | 1.63E-34     |
| rs11534419  | 6379_62   | Q86TH1  | ADAMTSL2 | Acute gastritis                        | 0.964    | -0.024 | 0.222 | 0.913    | 0.98 (0.63,1.51) | 0.005           | 1.65E-08       | TRUE                     | 8.06E-36     |
| rs11534419  | 6379_62   | Q86TH1  | ADAMTSL2 | Nonalcoholic fatty liver disease       | 0.981    | -0.016 | 0.210 | 0.939    | 0.98 (0.65,1.49) | 0.005           | 7.84E-09       | TRUE                     | 5.04E-36     |
| rs11534419  | 6379_62   | Q86TH1  | ADAMTSL2 | Irritable bowel syndrome               | 0.993    | 0.031  | 0.112 | 0.779    | 1.03 (0.83,1.28) | 0.005           | 1.20E-07       | TRUE                     | 1.78E-35     |
| rs11534419  | 6379_62   | Q86TH1  | ADAMTSL2 | Cholecystitis                          | 0.983    | 0.032  | 0.157 | 0.838    | 1.03 (0.76,1.41) | 0.005           | 5.75E-08       | TRUE                     | 9.05E-36     |
| rs11534419  | 6379_62   | Q86TH1  | ADAMTSL2 | Diverticular disease                   | 1.000    | 0.031  | 0.064 | 0.522    | 1.00 (0.91,1.17) | 0.005           | 3.60E-07       | TRUE                     | 2.49E-35     |
| rs1229984   | 9834_62   | P00325  | ADH1B    | Nonalcoholic fatty liver disease       | 0.306    | 0.524  | 0.240 | 0.067    | 1.69 (1.06,2.70) | 0.001           | 6.12E-06       | TRUE                     | 8.21E-10     |
| rs1229984   | 9834_62   | P00325  | ADH1B    | Cholelithiasis                         | 0.664    | -0.112 | 0.083 | 0.179    | 0.89 (0.76,1.05) | 0.001           | 2.33E-06       | TRUE                     | 7.06E-11     |
| rs1229984   | 9834_62   | P00325  | ADH1B    | Gastric ulcer                          | 0.715    | 0.181  | 0.153 | 0.236    | 1.20 (0.89,1.62) | 0.001           | 2.02E-06       | TRUE                     | 6.92E-11     |
| rs1229984   | 9834_62   | P00325  | ADH1B    | Chronic gastritis (Atrophic gastritis) | 0.843    | 0.320  | 0.226 | 0.156    | 1.38 (0.88,2.14) | 0.001           | 2.84E-06       | TRUE                     | 9.34E-11     |
| rs1229984   | 9834_62   | P00325  | ADH1B    | Gastroesophageal reflux disease        | 0.959    | -0.014 | 0.083 | 0.866    | 0.99 (0.84,1.16) | 0.001           | 3.89E-08       | TRUE                     | 1.42E-11     |
| rs1229984   | 9834_62   | P00325  | ADH1B    | Cholecystitis                          | -0.098   | 0.066  | 0.096 | 0.292    | 1.02 (0.54,1.92) | 0.001           | 1.53E-07       | TRUE                     | 4.89E-11     |
| rs1229984   | 9834_62   | P00325  | ADH1B    | Irritable bowel syndrome               | 0.993    | -0.051 | 0.133 | 0.704    | 0.95 (0.73,1.23) | 0.001           | 2.21E-07       | TRUE                     | 2.28E-11     |
| rs1229984   | 9834_62   | P00325  | ADH1B    | Cholecystitis                          | 0.983    | 0.036  | 0.185 | 0.845    | 1.04 (0.72,1.49) | 0.001           | 5.26E-08       | TRUE                     | 1.48E-11     |
| rs1229984   | 9834_62   | P00325  | ADH1B    | Diverticular disease                   | 1.000    | 0.000  | 0.068 | 0.995    | 1.00 (0.87,1.14) | 0.001           | 4.38E-11       | TRUE                     | 1.18E-11     |
| rs2602844   | 8325_37   | P08319  | ADH4     | Cholecystitis                          | 0.256    | 0.364  | 0.162 | 0.024    | 1.44 (1.05,1.98) | 0.005           | 6.99E-06       | TRUE                     | 4.95E-35     |
| rs2602844   | 8325_37   | P08319  | ADH4     | Gastroesophageal reflux disease        | 0.689    | 0.085  | 0.072 | 0.237    | 1.09 (0.95,1.25) | 0.005           | 1.92E-06       | TRUE                     | 2.71E-36     |
| rs2602844   | 8325_37   | P08319  | ADH4     | Chronic gastritis                      | -0.192   | 0.703  | 0.066 | 0.159    | 0.92 (0.63,1.36) | 0.005           | 2.89E-06       | TRUE                     | 6.84E-36     |
| rs2602844   | 8325_37   | P08319  | ADH4     | Cirrhosis                              | 0.798    | -0.249 | 0.163 | 0.127    | 0.78 (0.57,1.07) | 0.005           | 2.97E-06       | TRUE                     | 4.67E-36     |
| rs2602844   | 8325_37   | P08319  | ADH4     | Nonalcoholic fatty liver disease       | 0.795    | -0.256 | 0.216 | 0.236    | 0.77 (0.51,1.18) | 0.005           | 1.82E-06       | TRUE                     | 1.96E-36     |
| rs2602844   | 8325_37   | P08319  | ADH4     | Acute gastritis                        | 0.964    | -0.221 | 0.227 | 0.329    | 0.80 (0.51,1.25) | 0.005           | 1.35E-06       | TRUE                     | 1.86E-36     |
| rs2602844   | 8325_37   | P08319  | ADH4     | Chronic gastritis (Atrophic gastritis) | 0.993    | 0.007  | 0.139 | 0.963    | 1.01 (0.77,1.32) | 0.005           | 3.50E-09       | TRUE                     | 1.34E-37     |
| rs2602844   | 8325_37   | P08319  | ADH4     | Irritable bowel syndrome               | 0.993    | -0.050 | 0.114 | 0.658    | 0.95 (0.76,1.19) | 0.005           | 2.96E-07       | TRUE                     | 5.90E-37     |
| rs2602844   | 8325_37   | P08319  | ADH4     | Cholecystitis                          | 1.000    | -0.077 | 0.066 | 0.319    | 1.01 (0.85,1.14) | 0.005           | 1.32E-06       | TRUE                     | 1.63E-37     |
| rs143257534 | 3554_24   | O15848  | ADIPOQ   | Cholecystitis                          | 0.171    | 0.228  | 0.086 | 0.008    | 1.26 (1.06,1.49) | 0.020           | 9.56E-06       | TRUE                     | 1.67E-141    |
| rs143257534 | 3554_24   | O15848  | ADIPOQ   | Cirrhosis                              | 0.363    | 0.190  | 0.087 | 0.030    | 1.21 (1.02,1.44) | 0.020           | 6.07E-06       | TRUE                     | 3.30E-143    |
| rs143257534 | 3554_24   | O15848  | ADIPOQ   | Nonalcoholic fatty liver disease       | 0.635    | 0.174  | 0.115 | 0.129    | 1.19 (0.95,1.49) | 0.020           | 2.96E-06       | TRUE                     | 1.01E-144    |
| rs143257534 | 3554_24   | O15848  | ADIPOQ   | Cholelithiasis                         | 0.788    | 0.033  | 0.036 | 0.357    | 1.03 (0.96,1.11) | 0.020           | 1.10E-06       | TRUE                     | 4.68E-146    |
| rs143257534 | 3554_24   | O15848  | ADIPOQ   | Chronic gastritis (Atrophic gastritis) | 0.072    | 0.064  | 0.064 | 0.522    | 1.00 (0.93,1.07) | 0.020           | 1.28E-06       | TRUE                     | 6.62E-145    |
| rs143257534 | 3554_24   | O15848  | ADIPOQ   | Gastric ulcer                          | 0.849    | 0.054  | 0.073 | 0.454    | 1.06 (0.92,1.22) | 0.020           | 0.80E-07       | TRUE                     | 1.20E-145    |
| rs143257534 | 3554_24   | O15848  | ADIPOQ   | Gastroesophageal reflux disease        | 0.937    | 0.019  | 0.039 | 0.619    | 1.02 (0.95,1.10) | 0.020           | 3.38E-07       | TRUE                     | 1.20E-146    |
| rs143257534 | 3554_24   | O15848  | ADIPOQ   | Acute gastritis                        | 0.964    | -0.009 | 0.121 | 0.940    | 0.99 (0.78,1.26) | 0.020           | 8.02E-09       | TRUE                     | 2.14E-147    |
| rs143257534 | 3554_24   | O15848  | ADIPOQ   | Irritable bowel syndrome               | 0.993    | 0.044  | 0.061 | 0.472    | 1.04 (0.93,1.18) | 0.020           | 7.97E-07       | TRUE                     | 3.33E-145    |
| rs143257534 | 3554_24   | O15848  | ADIPOQ   | Diverticular disease                   | 1.000    | 0.011  | 0.034 | 0.744</  |                  |                 |                |                          |              |

Table S6. Association of putative type 2 diabetes-associated proteins in deCODE with gastrointestinal diseases.

| Index SNP    | Somalogic | UniProt | Gene   | GI outcomes                            | FDR   | b      | se    | pval  | OR (95% CI)      | snp_r2.exposure | snp_r2.outcome | correct_causal_direction | steiger_pval |
|--------------|-----------|---------|--------|----------------------------------------|-------|--------|-------|-------|------------------|-----------------|----------------|--------------------------|--------------|
| rs28590506   | 13460_4   | O15335  | CHAD   | Cholelithiasis                         | 0.983 | 0.109  | 0.369 | 0.768 | 1.11 (0.54,2.30) | 0.001           | 1.77E-07       | TRUE                     | 1.47E-08     |
| rs28590506   | 13460_4   | O15335  | CHAD   | Diverticular disease                   | 1.000 | -0.001 | 0.148 | 0.996 | 1.00 (0.88,1.17) | 0.004           | 2.92E-07       | TRUE                     | 1.81E-06     |
| rs28590506   | 13460_4   | O15335  | CHAD   | Cirrhosis                              | 1.000 | 0.109  | 0.375 | 0.772 | 1.11 (0.53,2.32) | 0.001           | 1.08E-07       | TRUE                     | 1.38E-08     |
| rs1908671    | 9416_77   | P14384  | CPM    | Cholelithiasis                         | 0.256 | 0.454  | 0.194 | 0.020 | 1.57 (1.08,2.31) | 0.004           | 7.47E-06       | TRUE                     | 1.94E-25     |
| rs1908671    | 9416_77   | P14384  | CPM    | Gastric ulcer                          | 0.708 | 0.228  | 0.164 | 0.164 | 1.26 (0.91,1.73) | 0.004           | 2.78E-06       | TRUE                     | 2.76E-26     |
| rs1908671    | 9416_77   | P14384  | CPM    | Nonalcoholic fatty liver disease       | 0.795 | 0.239  | 0.259 | 0.204 | 1.39 (0.84,2.31) | 0.004           | 2.07E-06       | TRUE                     | 1.29E-26     |
| rs1908671    | 9416_77   | P14384  | CPM    | Cholelithiasis                         | 0.788 | 0.081  | 0.082 | 0.323 | 1.08 (0.92,1.27) | 0.004           | 1.26E-06       | TRUE                     | 7.04E-27     |
| rs1908671    | 9416_77   | P14384  | CPM    | Diverticular disease                   | 0.913 | 0.079  | 0.077 | 0.305 | 0.99 (0.93,1.06) | 0.004           | 1.52E-06       | TRUE                     | 1.17E-26     |
| rs1908671    | 9416_77   | P14384  | CPM    | Chronic gastritis (Atrophic gastritis) | 0.859 | 0.136  | 0.173 | 0.430 | 1.15 (0.82,1.61) | 0.004           | 8.77E-07       | TRUE                     | 6.13E-27     |
| rs1908671    | 9416_77   | P14384  | CPM    | Gastroesophageal reflux disease        | 0.959 | 0.007  | 0.087 | 0.937 | 1.01 (0.85,1.19) | 0.004           | 7.81E-09       | TRUE                     | 1.03E-27     |
| rs1908671    | 9416_77   | P14384  | CPM    | Acute gastritis                        | 0.964 | 0.029  | 0.274 | 0.917 | 1.03 (0.60,1.76) | 0.004           | 1.59E-08       | TRUE                     | 1.24E-27     |
| rs1908671    | 9416_77   | P14384  | CPM    | Irritable bowel syndrome               | 0.924 | 0.168  | 0.138 | 0.225 | 1.18 (0.90,1.55) | 0.004           | 2.28E-06       | TRUE                     | 2.43E-26     |
| rs1908671    | 9416_77   | P14384  | CPM    | Cirrhosis                              | 1.000 | -0.001 | 0.197 | 0.860 | 1.00 (0.88,1.17) | 0.004           | 2.09E-11       | TRUE                     | 7.22E-26     |
| rs2645398    | 8007_19   | P07858  | CTSB   | Cholelithiasis                         | 0.077 | -0.080 | 0.032 | 0.059 | 0.91 (0.86,0.97) | 0.025           | 1.00E-05       | TRUE                     | 2.34E-185    |
| rs2645398    | 8007_19   | P07858  | CTSB   | Cirrhosis                              | 0.304 | -0.185 | 0.079 | 0.019 | 1.20 (1.03,1.41) | 0.025           | 7.04E-06       | TRUE                     | 1.25E-186    |
| rs2645398    | 8007_19   | P07858  | CTSB   | Chronic gastritis (Atrophic gastritis) | 0.859 | -0.050 | 0.066 | 0.444 | 0.95 (0.84,1.08) | 0.025           | 8.27E-07       | TRUE                     | 6.75E-190    |
| rs2645398    | 8007_19   | P07858  | CTSB   | Acute gastritis                        | 0.964 | 0.119  | 0.109 | 0.273 | 1.13 (0.91,1.40) | 0.025           | 1.71E-06       | TRUE                     | 6.98E-189    |
| rs2645398    | 8007_19   | P07858  | CTSB   | Nonalcoholic fatty liver disease       | 0.910 | 0.102  | 0.104 | 0.327 | 1.10 (0.90,1.36) | 0.025           | 1.23E-06       | TRUE                     | 3.08E-190    |
| rs2645398    | 8007_19   | P07858  | CTSB   | Gastroesophageal reflux disease        | 0.959 | 0.006  | 0.035 | 0.860 | 1.01 (0.94,1.08) | 0.025           | 4.42E-08       | TRUE                     | 8.18E-192    |
| rs2645398    | 8007_19   | P07858  | CTSB   | Gastric ulcer                          | 0.967 | 0.007  | 0.066 | 0.912 | 1.01 (0.88,1.15) | 0.025           | 1.73E-08       | TRUE                     | 1.52E-191    |
| rs2645398    | 8007_19   | P07858  | CTSB   | Irritable bowel syndrome               | 0.993 | 0.033  | 0.055 | 0.551 | 1.03 (0.93,1.15) | 0.025           | 5.46E-07       | TRUE                     | 1.62E-189    |
| rs2645398    | 8007_19   | P07858  | CTSB   | Cholelithiasis                         | 0.996 | -0.003 | 0.078 | 0.969 | 1.00 (0.86,1.16) | 0.025           | 2.15E-09       | TRUE                     | 3.43E-192    |
| rs2645398    | 8007_19   | P07858  | CTSB   | Diverticular disease                   | 1.000 | -0.008 | 0.031 | 0.792 | 0.99 (0.93,1.05) | 0.025           | 1.02E-07       | TRUE                     | 4.15E-191    |
| rs55861089   | 5508_62   | P07339  | CTSD   | Gastric ulcer                          | 0.368 | 0.202  | 0.085 | 0.018 | 1.22 (1.03,1.45) | 0.018           | 8.03E-06       | TRUE                     | 1.44E-130    |
| rs55861089   | 5508_62   | P07339  | CTSD   | Cholelithiasis                         | 0.018 | 0.133  | 0.089 | 0.122 | 1.08 (0.78,1.32) | 0.018           | 3.07E-07       | TRUE                     | 2.47E-133    |
| rs55861089   | 5508_62   | P07339  | CTSD   | Chronic gastritis (Atrophic gastritis) | 0.859 | 0.069  | 0.098 | 0.485 | 1.07 (0.88,1.30) | 0.018           | 6.90E-07       | TRUE                     | 1.27E-134    |
| rs55861089   | 5508_62   | P07339  | CTSD   | Acute gastritis                        | 0.939 | 0.246  | 0.144 | 0.087 | 1.28 (0.96,1.69) | 0.018           | 4.17E-06       | TRUE                     | 3.48E-132    |
| rs55861089   | 5508_62   | P07339  | CTSD   | Gastroesophageal reflux disease        | 0.959 | 0.100  | 0.045 | 0.818 | 1.01 (0.92,1.10) | 0.018           | 7.19E-08       | TRUE                     | 6.29E-136    |
| rs55861089   | 5508_62   | P07339  | CTSD   | Diverticular disease                   | 0.958 | 0.029  | 0.039 | 0.464 | 1.03 (0.95,1.11) | 0.018           | 8.66E-07       | TRUE                     | 2.07E-134    |
| rs55861089   | 5508_62   | P07339  | CTSD   | Nonalcoholic fatty liver disease       | 0.018 | 0.133  | 0.089 | 0.122 | 1.08 (0.78,1.32) | 0.018           | 2.25E-08       | TRUE                     | 1.48E-133    |
| rs55861089   | 5508_62   | P07339  | CTSD   | Gastric ulcer                          | 1.000 | 0.081  | 0.101 | 0.422 | 1.08 (0.89,1.32) | 0.018           | 7.28E-07       | TRUE                     | 4.70E-135    |
| rs55861089   | 5508_62   | P07339  | CTSD   | Irritable bowel syndrome               | 0.993 | 0.006  | 0.072 | 0.928 | 1.01 (0.87,1.16) | 0.018           | 1.29E-08       | TRUE                     | 1.73E-135    |
| rs55861089   | 5508_62   | P07339  | CTSD   | Cholelithiasis                         | 0.996 | 0.006  | 0.100 | 0.951 | 1.01 (0.83,1.23) | 0.018           | 4.91E-09       | TRUE                     | 2.58E-136    |
| rs10900074   | 9278_9    | P48061  | CXCL12 | Cholelithiasis                         | 0.248 | 0.244  | 0.113 | 0.031 | 1.28 (1.02,1.59) | 0.002           | 5.96E-06       | TRUE                     | 1.47E-112    |
| rs1023264    | 3516_60   | P48061  | CXCL12 | Chronic gastritis (Atrophic gastritis) | 0.589 | 0.267  | 0.115 | 0.020 | 1.31 (1.04,1.63) | 0.002           | 7.87E-06       | TRUE                     | 3.86E-48     |
| rs1023264    | 3516_60   | P48061  | CXCL12 | Cholelithiasis                         | 0.787 | 0.047  | 0.087 | 0.587 | 1.07 (0.97,1.18) | 0.002           | 2.59E-06       | TRUE                     | 1.85E-49     |
| rs10900074   | 9278_9    | P48061  | CXCL12 | Cholelithiasis                         | 0.718 | 0.362  | 0.270 | 0.181 | 1.44 (0.84,2.44) | 0.002           | 2.45E-06       | TRUE                     | 4.86E-13     |
| rs1023264    | 3516_60   | P48061  | CXCL12 | Gastroesophageal reflux disease        | 0.757 | 0.062  | 0.058 | 0.284 | 1.06 (0.95,1.19) | 0.002           | 1.57E-06       | TRUE                     | 5.34E-50     |
| rs10900074   | 9278_9    | P48061  | CXCL12 | Irritable bowel syndrome               | 0.798 | 0.314  | 0.192 | 0.101 | 1.37 (0.94,1.99) | 0.002           | 4.14E-06       | TRUE                     | 1.06E-12     |
| rs1023264    | 3516_60   | P48061  | CXCL12 | Cholelithiasis                         | 0.823 | 0.039  | 0.055 | 0.476 | 1.04 (0.93,1.16) | 0.002           | 6.56E-07       | TRUE                     | 1.18E-50     |
| rs10900074   | 9278_9    | P48061  | CXCL12 | Chronic gastritis (Atrophic gastritis) | 0.859 | 0.079  | 0.234 | 0.044 | 1.09 (0.76,1.59) | 0.002           | 8.33E-07       | TRUE                     | 2.07E-13     |
| rs1023264    | 3516_60   | P48061  | CXCL12 | Acute gastritis                        | 0.941 | -0.298 | 0.184 | 0.104 | 0.74 (0.52,1.08) | 0.002           | 3.76E-06       | TRUE                     | 1.26E-49     |
| rs1023264    | 3516_60   | P48061  | CXCL12 | Cholelithiasis                         | 0.942 | -0.092 | 0.130 | 0.478 | 0.91 (0.71,1.18) | 0.002           | 6.87E-07       | TRUE                     | 1.66E-50     |
| rs1023264    | 3516_60   | P48061  | CXCL12 | Nonalcoholic fatty liver disease       | 0.931 | -0.162 | 0.173 | 0.349 | 0.85 (0.61,1.19) | 0.002           | 1.12E-06       | TRUE                     | 2.26E-50     |
| rs10900074   | 9278_9    | P48061  | CXCL12 | Gastroesophageal reflux disease        | 0.959 | 0.014  | 0.121 | 0.907 | 1.01 (0.80,1.29) | 0.002           | 1.73E-08       | TRUE                     | 6.71E-14     |
| rs10900074   | 9278_9    | P48061  | CXCL12 | Cholelithiasis                         | 0.964 | 0.195  | 0.381 | 0.608 | 1.22 (0.88,1.68) | 0.002           | 3.77E-07       | TRUE                     | 1.39E-13     |
| rs10900074   | 9278_9    | P48061  | CXCL12 | Chronic gastritis (Atrophic gastritis) | 0.909 | 0.097  | 0.097 | 0.499 | 1.07 (0.91,1.26) | 0.002           | 2.97E-09       | TRUE                     | 1.54E-19     |
| rs10900074   | 9278_9    | P48061  | CXCL12 | Nonalcoholic fatty liver disease       | 0.981 | -0.031 | 0.360 | 0.930 | 0.97 (0.48,1.96) | 0.002           | 7.96E-09       | TRUE                     | 5.90E-14     |
| rs1023264    | 3516_60   | P48061  | CXCL12 | Irritable bowel syndrome               | 0.993 | -0.003 | 0.092 | 0.976 | 1.00 (0.83,1.19) | 0.002           | 1.13E-09       | TRUE                     | 3.43E-51     |
| rs1023264    | 3516_60   | P48061  | CXCL12 | Diverticular disease                   | 1.000 | 0.016  | 0.052 | 0.759 | 1.02 (0.92,1.12) | 0.002           | 1.42E-07       | TRUE                     | 6.17E-51     |
| rs1023264    | 3516_60   | P48061  | CXCL12 | Cirrhosis                              | 1.000 | 0.043  | 0.132 | 0.745 | 1.04 (0.81,1.35) | 0.002           | 1.37E-07       | TRUE                     | 3.31E-51     |
| rs10900074   | 9278_9    | P48061  | CXCL12 | Cirrhosis                              | 1.000 | -0.121 | 0.274 | 0.658 | 0.89 (0.52,1.51) | 0.002           | 2.90E-07       | TRUE                     | 1.03E-13     |
| rs10900074   | 9278_9    | P48061  | CXCL12 | Diverticular disease                   | 0.900 | -0.022 | 0.037 | 0.803 | 1.00 (0.92,1.09) | 0.002           | 8.89E-10       | TRUE                     | 1.22E-14     |
| rs12948284   | 17758_79  | Q724W1  | DCXR   | Gastroesophageal reflux disease        | 0.544 | -0.167 | 0.086 | 0.051 | 0.85 (0.71,1.00) | 0.003           | 5.22E-06       | TRUE                     | 2.91E-25     |
| rs12948284   | 17758_79  | Q724W1  | DCXR   | Gastric ulcer                          | 0.708 | 0.225  | 0.162 | 0.165 | 1.25 (0.91,1.72) | 0.003           | 2.79E-06       | TRUE                     | 1.01E-25     |
| rs12948284   | 17758_79  | Q724W1  | DCXR   | Cirrhosis                              | 0.798 | 0.270  | 0.194 | 0.164 | 1.31 (0.90,1.92) | 0.003           | 2.47E-06       | TRUE                     | 6.20E-26     |
| rs12948284   | 17758_79  | Q724W1  | DCXR   | Irritable bowel syndrome               | 0.798 | -0.231 | 0.135 | 0.088 | 0.79 (0.61,1.03) | 0.003           | 4.45E-06       | TRUE                     | 2.82E-25     |
| rs12948284   | 17758_79  | Q724W1  | DCXR   | Cholelithiasis                         | 0.823 | 0.065  | 0.080 | 0.419 | 1.07 (0.91,1.25) | 0.003           | 8.36E-07       | TRUE                     | 1.73E-26     |
| rs12948284   | 17758_79  | Q724W1  | DCXR   | Chronic gastritis (Atrophic gastritis) | 0.967 | 0.069  | 0.166 | 0.587 | 1.07 (0.97,1.18) | 0.003           | 2.51E-07       | TRUE                     | 1.85E-27     |
| rs12948284   | 17758_79  | Q724W1  | DCXR   | Acute gastritis                        | 0.964 | -0.253 | 0.270 | 0.348 | 0.78 (0.46,1.32) | 0.003           | 1.26E-06       | TRUE                     | 3.36E-26     |
| rs12948284   | 17758_79  | Q724W1  | DCXR   | Diverticular disease                   | 0.939 | -0.059 | 0.076 | 0.434 | 0.94 (0.81,1.09) | 0.003           | 8.83E-07       | TRUE                     | 2.42E-26     |
| rs12948284   | 17758_79  | Q724W1  | DCXR   | Nonalcoholic fatty liver disease       | 0.981 | -0.080 | 0.256 | 0.753 | 1.08 (0.66,1.79) | 0.003           | 1.28E-07       | TRUE                     | 5.62E-27     |
| rs12948284   | 17758_79  | Q724W1  | DCXR   | Cholelithiasis                         | 0.996 | -0.017 | 0.192 | 0.931 | 0.98 (0.88,1.13) | 0.003           | 1.01E-08       | TRUE                     | 4.00E-27     |
| rs78111814   | 9175_48   | O60469  | DSCAM  | Cholelithiasis                         | 0.756 | 0.049  | 0.069 | 0.291 | 1.07 (0.96,1.19) | 0.010           | 3.01E-06       | TRUE                     | 1.08E-15     |
| rs78111814   | 9175_48   | O60469  | DSCAM  | Chronic gastritis (Atrophic gastritis) | 0.741 | -0.100 | 0.101 | 0.323 | 0.90 (0.74,1.10) | 0.010           | 1.41E-06       | TRUE                     | 2.21E-75     |
| rs78111814   | 9175_48   | O60469  | DSCAM  | Cirrhosis                              | 0.798 | -0.160 | 0.122 | 0.187 | 0.85 (0.67,1.08) | 0.010           | 2.23E-06       | TRUE                     | 2.49E-75     |
| rs78111814   | 9175_48   | O60469  | DSCAM  | Chronic gastritis (Atrophic gastritis) | 0.859 | -0.089 | 0.096 | 0.351 | 0.91 (0.76,1.10) | 0.010           | 1.23E-06       | TRUE                     | 1.42E-75     |
| rs78111814   | 9175_48   | O60469  | DSCAM  | Acute gastritis                        | 0.964 | -0.152 | 0.165 | 0.357 | 0.86 (0.62,1.19) | 0.010           | 1.21E-06       | TRUE                     | 1.50E-75     |
| rs78111814   | 9175_48   | O60469  | DSCAM  | Gastroesophageal reflux disease        | 0.959 | 0.009  | 0.053 | 0.871 | 1.01 (0.91,1.12) | 0.010           | 3.56E-08       | TRUE                     | 4.85E-77     |
| rs78111814</ |           |         |        |                                        |       |        |       |       |                  |                 |                |                          |              |

Table S6. Association of putative type 2 diabetes-associated proteins in deCODE with gastrointestinal diseases.

| Index SNP  | SomaLogic | UniProt | Gene   | GI outcomes                            | FDR   | se     | pval  | OR (95% CI)        | snp_r2.exposure | snp_r2.outcome | correct_causal | direction | steiger_pval |
|------------|-----------|---------|--------|----------------------------------------|-------|--------|-------|--------------------|-----------------|----------------|----------------|-----------|--------------|
| rs3780126  | 9370_69   | C92820  | GGH    | Diverticular disease                   | 0.649 | 0.030  | 0.024 | 2.09 (1.03, 3.81)  | 0.025           | 2.32E-06       | TRUE           |           | 2.78E-188    |
| rs3780126  | 9370_69   | C92820  | GGH    | Gastric ulcer                          | 0.700 | 0.068  | 0.051 | 0.54 (0.39, 0.77)  | 0.025           | 2.62E-06       | TRUE           |           | 4.75E-168    |
| rs3780126  | 9370_69   | C92820  | GGH    | Acute gastritis                        | 0.964 | 0.076  | 0.085 | 0.367 (0.18, 0.72) | 0.025           | 1.16E-06       | TRUE           |           | 2.01E-189    |
| rs3780126  | 9370_69   | C92820  | GGH    | Nonalcoholic fatty liver disease       | 0.981 | 0.005  | 0.080 | 0.948 (0.1, 8.6)   | 0.025           | 5.38E-09       | TRUE           |           | 1.08E-192    |
| rs3780126  | 9370_69   | C92820  | GHR    | Cirrhosis                              | 1.000 | -0.030 | 0.061 | 0.627 (0.3, 1.0)   | 0.025           | 3.01E-07       | TRUE           |           | 1.40E-191    |
| rs4610468  | 2948_58   | P10912  | GHR    | Gastroesophageal reflux disease        | 0.567 | -0.128 | 0.068 | 0.662 (0.3, 1.1)   | 0.013           | 4.77E-06       | TRUE           |           | 2.96E-94     |
| rs4610468  | 2948_58   | P10912  | GHR    | Gastric ulcer                          | 0.708 | 0.217  | 0.120 | 0.172 (0.06, 0.57) | 0.013           | 4.67E-06       | TRUE           |           | 4.51E-94     |
| rs4610468  | 2948_58   | P10912  | GHR    | Acute gastritis                        | 0.939 | 0.110  | 0.110 | 0.164 (0.06, 0.41) | 0.013           | 2.75E-06       | TRUE           |           | 1.97E-95     |
| rs4610468  | 2948_58   | P10912  | GHR    | Nonalcoholic fatty liver disease       | 0.878 | -0.196 | 0.188 | 0.297 (0.07, 1.1)  | 0.013           | 1.40E-06       | TRUE           |           | 3.43E-96     |
| rs4610468  | 2948_58   | P10912  | GHR    | Cholelithiasis                         | 0.947 | 0.009  | 0.071 | 0.903 (0.1, 8.8)   | 0.013           | 1.87E-08       | TRUE           |           | 6.51E-98     |
| rs4610468  | 2948_58   | P10912  | GHR    | Cholecystitis                          | 0.942 | -0.093 | 0.147 | 0.527 (0.1, 2.2)   | 0.013           | 5.48E-07       | TRUE           |           | 1.19E-96     |
| rs4610468  | 2948_58   | P10912  | GHR    | Chronic gastritis (Atrophic gastritis) | 0.993 | -0.008 | 0.397 | 0.984 (0.4, 2.1)   | 0.013           | 5.98E-10       | TRUE           |           | 1.02E-97     |
| rs4610468  | 2948_58   | P10912  | GHR    | Irritable bowel syndrome               | 0.993 | -0.009 | 0.109 | 0.933 (0.3, 2.3)   | 0.013           | 1.02E-06       | TRUE           |           | 3.42E-97     |
| rs4610468  | 2948_58   | P10912  | GHR    | Diverticular disease                   | 1.000 | 0.012  | 0.053 | 0.811 (0.1, 5.1)   | 0.013           | 7.80E-08       | TRUE           |           | 3.33E-97     |
| rs4610468  | 2948_58   | P10912  | GHR    | Cirrhosis                              | 1.000 | 0.027  | 0.143 | 0.851 (0.3, 2.1)   | 0.013           | 4.46E-08       | TRUE           |           | 7.94E-98     |
| rs76829642 | 13697_51  | P21695  | GD1    | Cholecystitis                          | 0.718 | 0.326  | 0.253 | 0.198 (0.04, 0.8)  | 0.001           | 2.27E-06       | TRUE           |           | 1.48E-09     |
| rs76829642 | 13697_51  | P21695  | GD1    | Cholelithiasis                         | 0.906 | -0.042 | 0.111 | 0.709 (0.3, 1.5)   | 0.001           | 1.82E-07       | TRUE           |           | 4.01E-10     |
| rs76829642 | 13697_51  | P21695  | GD1    | Gastric ulcer                          | 0.953 | 0.086  | 0.212 | 0.684 (0.2, 1.6)   | 0.001           | 2.39E-07       | TRUE           |           | 4.77E-10     |
| rs76829642 | 13697_51  | P21695  | GD1    | Gastroesophageal reflux disease        | 0.953 | -0.009 | 0.099 | 0.933 (0.3, 2.3)   | 0.001           | 1.02E-06       | TRUE           |           | 2.96E-10     |
| rs76829642 | 13697_51  | P21695  | GD1    | Acute gastritis                        | 0.964 | -0.194 | 0.368 | 0.599 (0.2, 1.0)   | 0.001           | 3.94E-07       | TRUE           |           | 5.56E-10     |
| rs76829642 | 13697_51  | P21695  | GD1    | Nonalcoholic fatty liver disease       | 0.981 | 0.023  | 0.332 | 0.945 (0.2, 5.3)   | 0.001           | 6.13E-09       | TRUE           |           | 2.64E-10     |
| rs76829642 | 13697_51  | P21695  | GD1    | Cirrhosis                              | 1.000 | -0.181 | 0.252 | 0.473 (0.1, 1.3)   | 0.001           | 6.60E-07       | TRUE           |           | 6.27E-10     |
| rs76829642 | 13697_51  | P21695  | GD1    | Chronic gastritis (Atrophic gastritis) | 0.993 | -0.033 | 0.270 | 0.902 (0.3, 2.5)   | 0.001           | 2.13E-08       | TRUE           |           | 3.12E-10     |
| rs76829642 | 13697_51  | P21695  | GD1    | Irritable bowel syndrome               | 0.993 | 0.115  | 0.162 | 0.528 (0.1, 2.3)   | 0.001           | 6.11E-07       | TRUE           |           | 7.15E-10     |
| rs76829642 | 13697_51  | P21695  | GD1    | Diverticular disease                   | 0.993 | 0.068  | 0.096 | 0.874 (0.3, 2.4)   | 0.001           | 3.82E-07       | TRUE           |           | 4.77E-10     |
| rs10985149 | 16607_78  | P06396  | GSN    | Acute gastritis                        | 0.964 | 0.019  | 0.132 | 0.887 (0.2, 3.2)   | 0.009           | 2.86E-08       | TRUE           |           | 2.05E-71     |
| rs10985149 | 16607_78  | P06396  | GSN    | Chronic gastritis (Atrophic gastritis) | 0.993 | 0.004  | 0.075 | 0.954 (0.1, 8.7)   | 0.009           | 4.82E-09       | TRUE           |           | 1.38E-71     |
| rs10985149 | 16607_78  | P06396  | GSN    | Cholecystitis                          | 0.717 | 0.134  | 0.095 | 0.156 (0.01, 1.9)  | 0.009           | 2.77E-06       | TRUE           |           | 2.06E-69     |
| rs10985149 | 16607_78  | P06396  | GSN    | Cholelithiasis                         | 0.713 | 0.047  | 0.309 | 0.228 (0.05, 0.9)  | 0.009           | 1.88E-06       | TRUE           |           | 5.28E-70     |
| rs10985149 | 16607_78  | P06396  | GSN    | Chronic gastritis (Atrophic gastritis) | 0.993 | -0.064 | 0.068 | 0.569 (0.1, 2.4)   | 0.009           | 5.49E-07       | TRUE           |           | 6.23E-71     |
| rs10985149 | 16607_78  | P06396  | GSN    | Diverticular disease                   | 1.000 | -0.021 | 0.039 | 0.591 (0.1, 1.0)   | 0.009           | 1.06E-07       | TRUE           |           | 1.43E-70     |
| rs10985149 | 16607_78  | P06396  | GSN    | Gastric ulcer                          | 0.708 | 0.143  | 0.081 | 0.076 (0.01, 0.9)  | 0.009           | 4.54E-06       | TRUE           |           | 1.34E-68     |
| rs10985149 | 16607_78  | P06396  | GSN    | Gastroesophageal reflux disease        | 0.837 | -0.029 | 0.042 | 0.489 (0.1, 1.5)   | 0.009           | 6.52E-07       | TRUE           |           | 1.25E-70     |
| rs10985149 | 16607_78  | P06396  | GSN    | Irritable bowel syndrome               | 0.924 | 0.080  | 0.067 | 0.231 (0.08, 0.5)  | 0.009           | 2.20E-06       | TRUE           |           | 2.72E-69     |
| rs10985149 | 16607_78  | P06396  | GSN    | Nonalcoholic fatty liver disease       | 0.981 | -0.068 | 0.128 | 0.592 (0.1, 2.0)   | 0.009           | 3.68E-07       | TRUE           |           | 4.04E-71     |
| rs2144693  | 17138_8   | P08263  | GSTA1  | Cholecystitis                          | 0.669 | -0.039 | 0.104 | 0.669 (0.2, 1.9)   | 0.025           | 2.15E-06       | TRUE           |           | 2.12E-189    |
| rs2144693  | 17138_8   | P08263  | GSTA1  | Gastric ulcer                          | 0.708 | -0.100 | 0.061 | 0.099 (0.0, 0.8)   | 0.025           | 3.93E-06       | TRUE           |           | 3.37E-187    |
| rs2144693  | 17138_8   | P08263  | GSTA1  | Gastroesophageal reflux disease        | 0.773 | -0.026 | 0.032 | 0.415 (0.1, 1.0)   | 0.025           | 9.15E-07       | TRUE           |           | 4.72E-190    |
| rs2144693  | 17138_8   | P08263  | GSTA1  | Chronic gastritis (Atrophic gastritis) | 0.843 | -0.084 | 0.063 | 0.183 (0.02, 1.4)  | 0.025           | 2.51E-06       | TRUE           |           | 2.56E-188    |
| rs2144693  | 17138_8   | P08263  | GSTA1  | Acute gastritis                        | 0.964 | 0.104  | 0.102 | 0.304 (0.1, 0.9)   | 0.025           | 1.50E-06       | TRUE           |           | 4.47E-189    |
| rs2144693  | 17138_8   | P08263  | GSTA1  | Nonalcoholic fatty liver disease       | 0.981 | -0.055 | 0.096 | 0.565 (0.1, 2.4)   | 0.025           | 4.22E-07       | TRUE           |           | 2.51E-191    |
| rs2144693  | 17138_8   | P08263  | GSTA1  | Irritable bowel syndrome               | 0.993 | 0.001  | 0.051 | 0.988 (0.1, 9.0)   | 0.025           | 1.23E-10       | TRUE           |           | 3.22E-191    |
| rs2144693  | 17138_8   | P08263  | GSTA1  | Cholecystitis                          | 0.983 | -0.019 | 0.027 | 0.794 (0.1, 4.1)   | 0.025           | 9.22E-08       | TRUE           |           | 1.40E-191    |
| rs2144693  | 17138_8   | P08263  | GSTA1  | Cirrhosis                              | 1.000 | -0.013 | 0.073 | 0.861 (0.1, 6.1)   | 0.025           | 4.04E-08       | TRUE           |           | 2.10E-192    |
| rs2144693  | 17138_8   | P08263  | GSTA1  | Diverticular disease                   | 1.000 | 0.009  | 0.029 | 0.749 (0.1, 3.5)   | 0.025           | 1.54E-07       | TRUE           |           | 1.61E-191    |
| rs34356500 | 15562_24  | P08236  | GUSB   | Cholecystitis                          | 0.265 | 0.273  | 0.125 | 0.029 (0.1, 0.3)   | 0.008           | 6.86E-06       | TRUE           |           | 1.87E-58     |
| rs34356500 | 15562_24  | P08236  | GUSB   | Diverticular disease                   | 0.469 | -0.066 | 0.063 | 0.545 (0.1, 2.1)   | 0.008           | 4.37E-06       | TRUE           |           | 6.20E-59     |
| rs34356500 | 15562_24  | P08236  | GUSB   | Gastroesophageal reflux disease        | 0.589 | -0.096 | 0.056 | 0.086 (0.01, 0.8)  | 0.008           | 4.09E-06       | TRUE           |           | 3.71E-59     |
| rs34356500 | 15562_24  | P08236  | GUSB   | Gastric ulcer                          | 0.715 | -0.126 | 0.106 | 0.231 (0.08, 0.7)  | 0.008           | 2.07E-06       | TRUE           |           | 8.86E-60     |
| rs34356500 | 15562_24  | P08236  | GUSB   | Cirrhosis                              | 0.798 | 0.181  | 0.126 | 0.152 (0.04, 0.5)  | 0.008           | 2.62E-06       | TRUE           |           | 7.45E-60     |
| rs34356500 | 15562_24  | P08236  | GUSB   | Irritable bowel syndrome               | 0.798 | -0.134 | 0.088 | 0.128 (0.07, 0.2)  | 0.008           | 3.52E-06       | TRUE           |           | 5.02E-59     |
| rs34356500 | 15562_24  | P08236  | GUSB   | Cholelithiasis                         | 0.823 | 0.036  | 0.052 | 0.493 (0.1, 1.9)   | 0.008           | 5.99E-07       | TRUE           |           | 6.04E-61     |
| rs34356500 | 15562_24  | P08236  | GUSB   | Chronic gastritis (Atrophic gastritis) | 0.959 | -0.023 | 0.019 | 0.519 (0.1, 2.0)   | 0.008           | 1.79E-06       | TRUE           |           | 6.73E-60     |
| rs34356500 | 15562_24  | P08236  | GUSB   | Acute gastritis                        | 0.939 | 0.264  | 0.176 | 0.133 (0.02, 0.8)  | 0.008           | 3.21E-06       | TRUE           |           | 2.38E-59     |
| rs3828998  | 2771_35   | P08833  | IGFBP1 | Cholelithiasis                         | 0.664 | 0.126  | 0.098 | 0.196 (0.01, 3.7)  | 0.003           | 2.15E-06       | TRUE           |           | 3.14E-19     |
| rs3828998  | 2771_35   | P08833  | IGFBP1 | Gastric ulcer                          | 0.708 | -0.303 | 0.195 | 0.120 (0.04, 0.5)  | 0.003           | 3.48E-06       | TRUE           |           | 7.41E-19     |
| rs3828998  | 2771_35   | P08833  | IGFBP1 | Acute gastritis                        | 0.939 | -0.446 | 0.326 | 0.172 (0.04, 0.7)  | 0.003           | 2.67E-06       | TRUE           |           | 4.94E-19     |
| rs3828998  | 2771_35   | P08833  | IGFBP1 | Chronic gastritis (Atrophic gastritis) | 0.881 | -0.098 | 0.203 | 0.531 (0.1, 2.3)   | 0.003           | 3.29E-07       | TRUE           |           | 8.21E-20     |
| rs3828998  | 2771_35   | P08833  | IGFBP1 | Gastroesophageal reflux disease        | 0.939 | 0.039  | 0.104 | 0.708 (0.1, 3.1)   | 0.003           | 2.19E-06       | TRUE           |           | 2.12E-189    |
| rs3828998  | 2771_35   | P08833  | IGFBP1 | Nonalcoholic fatty liver disease       | 0.981 | 0.161  | 0.309 | 0.602 (0.1, 6.4)   | 0.003           | 3.48E-07       | TRUE           |           | 7.04E-20     |
| rs3828998  | 2771_35   | P08833  | IGFBP1 | Irritable bowel syndrome               | 0.993 | 0.052  | 0.164 | 0.751 (0.1, 4.5)   | 0.003           | 1.52E-07       | TRUE           |           | 1.77E-20     |
| rs3828998  | 2771_35   | P08833  | IGFBP1 | Cholecystitis                          | 0.983 | 0.085  | 0.231 | 0.715 (0.1, 3.0)   | 0.003           | 1.83E-07       | TRUE           |           | 6.05E-20     |
| rs3828998  | 2771_35   | P08833  | IGFBP1 | Diverticular disease                   | 1.000 | 0.005  | 0.092 | 0.955 (0.1, 8.4)   | 0.003           | 5.22E-09       | TRUE           |           | 3.84E-20     |
| rs3828998  | 2771_35   | P08833  | IGFBP1 | Chronic gastritis (Atrophic gastritis) | 0.939 | -0.034 | 0.016 | 0.261 (0.07, 0.9)  | 0.003           | 4.10E-07       | TRUE           |           | 3.03E-20     |
| rs4674100  | 8469_41   | P18065  | IGFBP2 | Gastroesophageal reflux disease        | 0.589 | 0.264  | 0.151 | 0.081 (0.01, 0.7)  | 0.001           | 4.18E-06       | TRUE           |           | 3.33E-08     |
| rs4674100  | 8469_41   | P18065  | IGFBP2 | Cholecystitis                          | 0.823 | -0.382 | 0.338 | 0.258 (0.03, 1.2)  | 0.001           | 1.76E-06       | TRUE           |           | 1.55E-08     |
| rs4674100  | 8469_41   | P18065  | IGFBP2 | Chronic gastritis (Atrophic gastritis) | 0.859 | 0.176  | 0.285 | 0.537 (0.1, 2.6)   | 0.001           | 5.36E-07       | TRUE           |           | 8.37E-09     |
| rs4674100  | 8469_41   | P18065  | IGFBP2 | Gastric ulcer                          | 0.967 | -0.065 | 0.285 | 0.819 (0.4, 1.5)   | 0.001           | 7.73E-08       | TRUE           |           | 5.17E-09     |
| rs4674100  | 8469_41   | P18065  | IGFBP2 | Cholelithiasis                         | 0.947 | 0.019  | 0.141 | 0.891 (0.2, 3.1)   | 0.001           | 2.25E-08       | TRUE           |           | 4.11E-09     |
| rs4674100  | 8469_41   | P18065  | IGFBP2 | Acute gastritis                        | 0.913 | -0.084 | 0.123 | 0.474 (0.1, 1.8)   | 0.001           | 8.21E-08       | TRUE           |           | 6.20E-09     |
| rs4674100  | 8469_41   | P18065  | IGFBP2 | Cirrhosis                              | 1.000 | -0.338 | 0.343 | 0.325 (0.1, 0.9)   | 0.001           | 1.25E-06       | TRUE           |           | 1.18E-08     |
| rs4674100  | 8469_41   | P18065  | IGFBP2 | Nonalcoholic fatty liver disease       | 0.981 | 0.384  | 0.451 | 0.394 (0.1, 1.1)   | 0.              |                |                |           |              |

Table S6. Association of putative type 2 diabetes-associated proteins in deCODE with gastrointestinal diseases.

| Index SNP | SomaLogIC | UnIProt | Gene  | GI outcomes                            | FDR    | b      | se    | pval  | OR (95% CI)      | snp_r2.exposure | snp_r2.outcome | correct_causal_direction | steiger_pval |
|-----------|-----------|---------|-------|----------------------------------------|--------|--------|-------|-------|------------------|-----------------|----------------|--------------------------|--------------|
| rs2228603 | 15573_110 | O14594  | NCAN  | Cholelithiasis                         | 0.823  | 0.033  | 0.042 | 0.436 | 1.03 (0.95,1.12) | 0.012           | 7.89E-07       | TRUE                     | 1.31E-88     |
| rs2228603 | 15573_110 | O14594  | NCAN  | Chronic gastritis (Atrophic gastritis) | 0.851  | -0.092 | 0.061 | 0.841 | 0.99 (0.88,1.1)  | 0.025           | 1.54E-06       | TRUE                     | 1.0E-197     |
| rs2228603 | 15573_110 | O14594  | NCAN  | Cholelithiasis                         | 0.942  | 0.082  | 0.100 | 0.411 | 1.09 (0.89,1.32) | 0.012           | 9.31E-07       | TRUE                     | 2.93E-88     |
| rs2228603 | 15573_110 | O14594  | NCAN  | Acute gastritis                        | 0.964  | 0.080  | 0.140 | 0.568 | 1.08 (0.82,1.43) | 0.012           | 4.66E-07       | TRUE                     | 1.48E-88     |
| rs2228603 | 15573_110 | O14594  | NCAN  | Diverticular disease                   | 1.000  | -0.012 | 0.040 | 0.756 | 0.99 (0.91,1.07) | 0.012           | 1.37E-07       | TRUE                     | 5.20E-89     |
| rs6656887 | 7179_69   | O94856  | NFASC | Chronic gastritis (Atrophic gastritis) | 0.859  | 0.033  | 0.052 | 0.529 | 1.03 (0.93,1.15) | 0.025           | 5.57E-07       | TRUE                     | 2.78E-190    |
| rs6656887 | 7179_69   | O94856  | NFASC | Cholelithiasis                         | 0.909  | -0.008 | 0.025 | 0.753 | 0.99 (0.95,1.04) | 0.025           | 1.29E-07       | TRUE                     | 5.95E-192    |
| rs6656887 | 7179_69   | O94856  | NFASC | Chronic gastritis (Atrophic gastritis) | 0.953  | 0.049  | 0.079 | 0.691 | 1.02 (0.93,1.12) | 0.025           | 2.28E-07       | TRUE                     | 9.87E-191    |
| rs6656887 | 7179_69   | O94856  | NFASC | Gastroesophageal reflux disease        | 0.959  | -0.008 | 0.026 | 0.771 | 0.99 (0.94,1.04) | 0.025           | 1.89E-11       | TRUE                     | 1.65E-191    |
| rs6656887 | 7179_69   | O94856  | NFASC | Acute gastritis                        | 0.964  | -0.041 | 0.082 | 0.615 | 0.96 (0.82,1.13) | 0.025           | 3.60E-07       | TRUE                     | 1.52E-190    |
| rs6656887 | 7179_69   | O94856  | NFASC | Nonalcoholic fatty liver disease       | 0.981  | 0.017  | 0.077 | 0.823 | 1.02 (0.87,1.18) | 0.025           | 6.45E-08       | TRUE                     | 2.89E-192    |
| rs6656887 | 7179_69   | O94856  | NFASC | Irritable bowel syndrome               | 0.993  | -0.012 | 0.041 | 0.766 | 0.99 (0.91,1.07) | 0.025           | 1.33E-07       | TRUE                     | 2.15E-190    |
| rs6656887 | 7179_69   | O94856  | NFASC | Cholelithiasis                         | 0.983  | -0.012 | 0.058 | 0.841 | 0.99 (0.88,1.1)  | 0.025           | 5.80E-08       | TRUE                     | 5.64E-192    |
| rs6656887 | 7179_69   | O94856  | NFASC | Cirrhosis                              | 1.000  | -0.020 | 0.059 | 0.736 | 0.98 (0.87,1.1)  | 0.025           | 1.47E-07       | TRUE                     | 5.86E-192    |
| rs6656887 | 7179_69   | O94856  | NFASC | Diverticular disease                   | 1.000  | -0.004 | 0.023 | 0.872 | 1.00 (0.95,1.04) | 0.025           | 3.80E-08       | TRUE                     | 2.11E-191    |
| rs198379  | 7655_11   | P16860  | NPPB  | Acute gastritis                        | 0.964  | 0.044  | 0.097 | 0.651 | 1.04 (0.86,1.26) | 0.025           | 2.92E-07       | TRUE                     | 1.10E-190    |
| rs198379  | 7655_11   | P16860  | NPPB  | Chronic gastritis (Atrophic gastritis) | 0.881  | 0.029  | 0.060 | 0.633 | 1.03 (0.91,1.16) | 0.025           | 3.21E-07       | TRUE                     | 1.05E-190    |
| rs198379  | 7655_11   | P16860  | NPPB  | Cholelithiasis                         | 0.942  | 0.044  | 0.069 | 0.527 | 1.04 (0.91,1.20) | 0.025           | 5.51E-07       | TRUE                     | 1.51E-190    |
| rs198379  | 7655_11   | P16860  | NPPB  | Cirrhosis                              | 0.238  | 0.064  | 0.029 | 0.225 | 1.07 (1.01,1.13) | 0.025           | 6.40E-06       | TRUE                     | 7.64E-187    |
| rs198379  | 7655_11   | P16860  | NPPB  | Cirrhosis                              | 1.000  | -0.048 | 0.070 | 0.488 | 0.95 (0.83,1.09) | 0.025           | 6.13E-07       | TRUE                     | 5.02E-191    |
| rs198379  | 7655_11   | P16860  | NPPB  | Diverticular disease                   | 0.649  | 0.037  | 0.028 | 0.181 | 1.04 (0.98,1.1)  | 0.025           | 2.63E-06       | TRUE                     | 4.74E-188    |
| rs198379  | 7655_11   | P16860  | NPPB  | Gastric ulcer                          | 0.715  | 0.066  | 0.058 | 0.257 | 1.07 (0.95,1.20) | 0.025           | 1.85E-06       | TRUE                     | 1.18E-188    |
| rs198379  | 7655_11   | P16860  | NPPB  | Gastroesophageal reflux disease        | 0.643  | -0.039 | 0.031 | 0.201 | 0.96 (0.91,1.02) | 0.025           | 2.21E-06       | TRUE                     | 8.31E-189    |
| rs198379  | 7655_11   | P16860  | NPPB  | Irritable bowel syndrome               | 0.798  | 0.072  | 0.049 | 0.140 | 1.07 (0.98,1.18) | 0.025           | 3.34E-06       | TRUE                     | 5.67E-187    |
| rs198379  | 7655_11   | P16860  | NPPB  | Nonalcoholic fatty liver disease       | 0.769  | 0.039  | 0.062 | 0.780 | 0.99 (0.86,1.13) | 0.025           | 9.40E-07       | TRUE                     | 4.04E-189    |
| rs7289344 | 15511_37  | O95502  | NPTXR | Cholelithiasis                         | 0.077  | 0.037  | 0.013 | 0.006 | 1.04 (1.01,1.06) | 0.025           | 9.62E-06       | TRUE                     | 1.65E-185    |
| rs7289344 | 15511_37  | O95502  | NPTXR | Cirrhosis                              | 0.883  | -0.040 | 0.035 | 0.251 | 0.96 (0.90,1.03) | 0.025           | 1.69E-06       | TRUE                     | 8.35E-190    |
| rs7289344 | 15511_37  | O95502  | NPTXR | Chronic gastritis (Atrophic gastritis) | 0.843  | 0.031  | 0.025 | 0.208 | 1.03 (0.98,1.08) | 0.025           | 2.23E-06       | TRUE                     | 1.60E-188    |
| rs7289344 | 15511_37  | O95502  | NPTXR | Acute gastritis                        | 0.964  | 0.051  | 0.046 | 0.269 | 1.05 (0.98,1.15) | 0.025           | 1.75E-06       | TRUE                     | 7.54E-189    |
| rs7289344 | 15511_37  | O95502  | NPTXR | Cholelithiasis                         | 0.229  | 0.042  | 0.029 | 0.942 | 1.03 (0.96,1.10) | 0.025           | 9.85E-07       | TRUE                     | 5.90E-189    |
| rs7289344 | 15511_37  | O95502  | NPTXR | Gastric ulcer                          | 0.953  | -0.012 | 0.029 | 0.884 | 0.99 (0.93,1.05) | 0.025           | 2.40E-07       | TRUE                     | 1.06E-190    |
| rs7289344 | 15511_37  | O95502  | NPTXR | Diverticular disease                   | 0.939  | 0.011  | 0.014 | 0.439 | 1.01 (0.98,1.04) | 0.025           | 8.61E-07       | TRUE                     | 1.12E-189    |
| rs7289344 | 15511_37  | O95502  | NPTXR | Gastroesophageal reflux disease        | 0.959  | 0.003  | 0.015 | 0.840 | 1.00 (0.97,1.03) | 0.025           | 5.52E-08       | TRUE                     | 9.36E-192    |
| rs7289344 | 15511_37  | O95502  | NPTXR | Irritable bowel syndrome               | 0.993  | -0.006 | 0.024 | 0.799 | 0.99 (0.95,1.04) | 0.025           | 1.01E-11       | TRUE                     | 1.66E-190    |
| rs7289344 | 15511_37  | O95502  | NPTXR | Nonalcoholic fatty liver disease       | 0.998  | 0.000  | 0.046 | 0.998 | 1.00 (0.91,1.10) | 0.025           | 1.07E-07       | TRUE                     | 7.35E-193    |
| rs844124  | 11313_100 | P61457  | PCBD1 | Gastroesophageal reflux disease        | 0.181  | 0.047  | 0.018 | 0.181 | 1.05 (0.95,1.16) | 0.025           | 2.19E-05       | TRUE                     | 4.08E-191    |
| rs844124  | 11313_100 | P61457  | PCBD1 | Nonalcoholic fatty liver disease       | 0.309  | 0.438  | 0.198 | 0.027 | 1.55 (1.05,2.28) | 0.006           | 6.30E-06       | TRUE                     | 5.35E-45     |
| rs844124  | 11313_100 | P61457  | PCBD1 | Cholelithiasis                         | 0.823  | 0.045  | 0.063 | 0.468 | 1.05 (0.93,1.18) | 0.006           | 6.95E-07       | TRUE                     | 6.67E-47     |
| rs844124  | 11313_100 | P61457  | PCBD1 | Chronic gastritis (Atrophic gastritis) | 0.859  | 0.100  | 0.130 | 0.441 | 1.11 (0.86,1.43) | 0.006           | 8.40E-07       | TRUE                     | 1.26E-46     |
| rs844124  | 11313_100 | P61457  | PCBD1 | Cholelithiasis                         | 0.880  | 0.145  | 0.149 | 0.330 | 1.16 (0.86,1.55) | 0.006           | 1.31E-06       | TRUE                     | 1.99E-46     |
| rs844124  | 11313_100 | P61457  | PCBD1 | Acute gastritis                        | 0.939  | -0.482 | 0.209 | 0.021 | 0.62 (0.41,0.93) | 0.006           | 7.60E-06       | TRUE                     | 1.63E-44     |
| rs844124  | 11313_100 | P61457  | PCBD1 | Gastric ulcer                          | 0.939  | 0.125  | 0.125 | 0.369 | 1.07 (0.98,1.17) | 0.006           | 8.27E-08       | TRUE                     | 1.55E-47     |
| rs844124  | 11313_100 | P61457  | PCBD1 | Irritable bowel syndrome               | 0.924  | 0.126  | 0.105 | 0.230 | 1.13 (0.92,1.39) | 0.006           | 2.21E-06       | TRUE                     | 8.65E-46     |
| rs844124  | 11313_100 | P61457  | PCBD1 | Diverticular disease                   | 1.000  | 0.002  | 0.059 | 0.979 | 1.00 (0.89,1.12) | 0.006           | 1.36E-09       | TRUE                     | 1.33E-47     |
| rs844124  | 11313_100 | P61457  | PCBD1 | Cirrhosis                              | 1.000  | 0.043  | 0.150 | 0.775 | 1.04 (0.78,1.40) | 0.006           | 1.07E-07       | TRUE                     | 1.65E-47     |
| rs575280  | 4459_68   | Q16549  | PCSK7 | Chronic gastritis (Atrophic gastritis) | 0.704  | -0.110 | 0.060 | 0.066 | 0.90 (0.80,1.01) | 0.025           | 4.76E-06       | TRUE                     | 6.47E-187    |
| rs575280  | 4459_68   | Q16549  | PCSK7 | Cholelithiasis                         | 0.969  | -0.069 | 0.069 | 0.889 | 1.01 (0.95,1.07) | 0.025           | 1.36E-06       | TRUE                     | 1.89E-187    |
| rs575280  | 4459_68   | Q16549  | PCSK7 | Cholelithiasis                         | 0.947  | -0.005 | 0.029 | 0.863 | 0.99 (0.94,1.05) | 0.025           | 4.04E-08       | TRUE                     | 2.51E-192    |
| rs575280  | 4459_68   | Q16549  | PCSK7 | Gastroesophageal reflux disease        | 0.959  | 0.003  | 0.031 | 0.928 | 1.00 (0.94,1.07) | 0.025           | 1.04E-08       | TRUE                     | 4.54E-192    |
| rs575280  | 4459_68   | Q16549  | PCSK7 | Acute gastritis                        | 0.964  | 0.025  | 0.098 | 0.798 | 1.03 (0.85,1.24) | 0.025           | 9.35E-08       | TRUE                     | 3.08E-191    |
| rs575280  | 4459_68   | Q16549  | PCSK7 | Gastric ulcer                          | 0.967  | -0.006 | 0.059 | 0.924 | 0.99 (0.89,1.12) | 0.025           | 1.33E-08       | TRUE                     | 1.39E-191    |
| rs575280  | 4459_68   | Q16549  | PCSK7 | Nonalcoholic fatty liver disease       | 0.981  | -0.055 | 0.093 | 0.558 | 0.95 (0.79,1.14) | 0.025           | 4.41E-07       | TRUE                     | 2.71E-191    |
| rs575280  | 4459_68   | Q16549  | PCSK7 | Chronic gastritis (Atrophic gastritis) | 0.950  | 0.001  | 0.071 | 0.490 | 1.05 (0.95,1.17) | 0.025           | 6.41E-07       | TRUE                     | 5.35E-191    |
| rs575280  | 4459_68   | Q16549  | PCSK7 | Irritable bowel syndrome               | 0.993  | 0.009  | 0.050 | 0.854 | 1.01 (0.92,1.11) | 0.025           | 5.08E-08       | TRUE                     | 1.01E-190    |
| rs575280  | 4459_68   | Q16549  | PCSK7 | Diverticular disease                   | 1.000  | 0.006  | 0.028 | 0.822 | 1.01 (0.95,1.06) | 0.025           | 7.15E-08       | TRUE                     | 3.13E-191    |
| rs748844  | 3216_2    | P01833  | PIGR  | Gastric ulcer                          | 0.886  | 0.061  | 0.103 | 0.554 | 1.06 (0.87,1.30) | 0.008           | 5.05E-07       | TRUE                     | 1.77E-60     |
| rs748844  | 3216_2    | P01833  | PIGR  | Acute gastritis                        | 0.939  | 0.219  | 0.173 | 0.205 | 1.25 (0.89,1.75) | 0.008           | 2.30E-06       | TRUE                     | 1.88E-59     |
| rs748844  | 3216_2    | P01833  | PIGR  | Gastroesophageal reflux disease        | 0.894  | -0.031 | 0.055 | 0.573 | 0.97 (0.87,1.08) | 0.008           | 4.32E-07       | TRUE                     | 1.09E-60     |
| rs748844  | 3216_2    | P01833  | PIGR  | Gastroesophageal reflux disease        | 0.942  | -0.042 | 0.077 | 0.893 | 0.96 (0.78,1.18) | 0.008           | 2.19E-05       | TRUE                     | 4.42E-61     |
| rs748844  | 3216_2    | P01833  | PIGR  | Cholelithiasis                         | 0.906  | -0.018 | 0.051 | 0.722 | 0.98 (0.89,1.09) | 0.008           | 1.67E-07       | TRUE                     | 3.60E-61     |
| rs748844  | 3216_2    | P01833  | PIGR  | Cholelithiasis                         | 0.942  | 0.085  | 0.122 | 0.487 | 1.09 (0.86,1.38) | 0.008           | 6.59E-07       | TRUE                     | 1.75E-60     |
| rs748844  | 3216_2    | P01833  | PIGR  | Nonalcoholic fatty liver disease       | 0.981  | 0.133  | 0.164 | 0.417 | 1.14 (0.83,1.57) | 0.008           | 8.50E-07       | TRUE                     | 1.64E-60     |
| rs748844  | 3216_2    | P01833  | PIGR  | Irritable bowel syndrome               | 0.993  | 0.082  | 0.087 | 0.345 | 1.09 (0.92,1.29) | 0.008           | 1.37E-06       | TRUE                     | 1.08E-59     |
| rs748844  | 3216_2    | P01833  | PIGR  | Cirrhosis                              | -0.020 | 0.004  | 0.012 | 0.124 | 0.99 (0.77,1.28) | 0.008           | 3.04E-08       | TRUE                     | 1.70E-61     |
| rs748844  | 3216_2    | P01833  | PIGR  | Diverticular disease                   | 1.000  | 0.020  | 0.049 | 0.679 | 1.02 (0.93,1.12) | 0.008           | 2.82E-07       | TRUE                     | 9.25E-61     |
| rs2020921 | 2212_69   | P00750  | PLAT  | Gastric ulcer                          | 0.708  | 0.130  | 0.101 | 0.199 | 1.14 (0.93,1.39) | 0.018           | 2.38E-06       | TRUE                     | 1.37E-134    |
| rs2020921 | 2212_69   | P00750  | PLAT  | Cholelithiasis                         | 0.713  | -0.064 | 0.054 | 0.234 | 0.94 (0.84,1.04) | 0.018           | 1.83E-06       | TRUE                     | 1.24E-135    |
| rs2020921 | 2212_69   | P00750  | PLAT  | Gastroesophageal reflux disease        | 0.773  | 0.047  | 0.056 | 0.400 | 1.05 (0.94,1.17) | 0.018           | 9.71E-07       | TRUE                     | 5.17E-136    |
| rs2020921 | 2212_69   | P00750  | PLAT  | Irritable bowel syndrome               | 0.798  | 0.123  | 0.088 | 0.162 | 1.13 (0.95,1.34) | 0.018           | 2.99E-06       | TRUE                     | 8.44E-134    |
| rs2020921 | 2212_69   | P00750  | PLAT  | Acute gastritis                        | 0.834  |        |       |       |                  |                 |                |                          |              |

Table S6. Association of putative type 2 diabetes-associated proteins in deCODE with gastrointestinal diseases.

| Index SNP  | SomalLogic | UniProt | Gene    | GI outcomes                            | FDR * | b      | se    | pval  | OR (95% CI)      | snp_r2.exposure | snp_r2.outcome | correct_causal_direction | steiger_pval |
|------------|------------|---------|---------|----------------------------------------|-------|--------|-------|-------|------------------|-----------------|----------------|--------------------------|--------------|
| rs2695234  | 5660_51    | P08294  | SOD3    | Diverticular disease                   | 0.649 | 0.032  | 0.024 | 0.176 | 1.03 (0.99,1.08) | 0.025           | 2.62E-06       | TRUE                     | 4.70E-188    |
| rs2695234  | 5660_51    | P08294  | SOD3    | Irritable bowel syndrome               | 0.798 | -0.072 | 0.042 | 0.088 | 0.93 (0.86,1.01) | 0.025           | 4.48E-06       | TRUE                     | 2.85E-186    |
| rs2695234  | 5660_51    | P08294  | SOD3    | Chronic gastritis (Atrophic gastritis) | 0.881 | -0.025 | 0.050 | 0.613 | 0.97 (0.88,1.08) | 0.025           | 3.61E-07       | TRUE                     | 1.26E-190    |
| rs2695234  | 5660_51    | P08294  | SOD3    | Cholelithiasis                         | 0.923 | 0.006  | 0.025 | 0.822 | 1.01 (0.96,1.06) | 0.025           | 6.99E-08       | TRUE                     | 3.40E-192    |
| rs2695234  | 5660_51    | P08294  | SOD3    | Acute gastritis                        | 0.964 | 0.018  | 0.083 | 0.831 | 1.02 (0.86,1.20) | 0.025           | 6.53E-08       | TRUE                     | 2.35E-191    |
| rs2695234  | 5660_51    | P08294  | SOD3    | Gastric ulcer                          | 0.967 | -0.003 | 0.050 | 0.956 | 1.00 (0.90,1.10) | 0.025           | 4.23E-09       | TRUE                     | 1.08E-191    |
| rs2695234  | 5660_51    | P08294  | SOD3    | Nonalcoholic fatty liver disease       | 0.981 | -0.021 | 0.079 | 0.787 | 0.98 (0.84,1.14) | 0.025           | 9.38E-08       | TRUE                     | 3.85E-192    |
| rs2695234  | 5660_51    | P08294  | SOD3    | Cirrhosis                              | 1.000 | -0.052 | 0.061 | 0.387 | 0.95 (0.84,1.07) | 0.025           | 9.81E-07       | TRUE                     | 1.47E-190    |
| rs2695234  | 5660_51    | P08294  | SOD3    | Cholecystitis                          | 0.983 | 0.021  | 0.059 | 0.727 | 1.02 (0.91,1.15) | 0.025           | 1.67E-07       | TRUE                     | 2.47E-191    |
| rs72722045 | 15447_45   | Q00796  | SORD    | Cirrhosis                              | 0.304 | -0.213 | 0.088 | 0.016 | 0.81 (0.68,0.96) | 0.019           | 7.48E-06       | TRUE                     | 4.04E-141    |
| rs72722045 | 15447_45   | Q00796  | SORD    | Gastroesophageal reflux disease        | 0.643 | 0.058  | 0.039 | 0.134 | 1.06 (0.98,1.14) | 0.019           | 3.05E-06       | TRUE                     | 1.04E-142    |
| rs72722045 | 15447_45   | Q00796  | SORD    | Cholelithiasis                         | 0.821 | -0.031 | 0.036 | 0.385 | 0.97 (0.90,1.04) | 0.019           | 9.77E-07       | TRUE                     | 1.25E-144    |
| rs72722045 | 15447_45   | Q00796  | SORD    | Gastric ulcer                          | 0.876 | 0.046  | 0.073 | 0.534 | 1.05 (0.91,1.21) | 0.019           | 5.62E-07       | TRUE                     | 2.09E-144    |
| rs72722045 | 15447_45   | Q00796  | SORD    | Chronic gastritis (Atrophic gastritis) | 0.881 | -0.037 | 0.074 | 0.815 | 0.96 (0.83,1.11) | 0.019           | 3.54E-07       | TRUE                     | 7.26E-145    |
| rs72722045 | 15447_45   | Q00796  | SORD    | Acute gastritis                        | 0.964 | 0.031  | 0.122 | 0.798 | 1.03 (0.81,1.31) | 0.019           | 9.24E-08       | TRUE                     | 2.11E-145    |
| rs72722045 | 15447_45   | Q00796  | SORD    | Nonalcoholic fatty liver disease       | 0.981 | -0.070 | 0.116 | 0.543 | 0.93 (0.74,1.17) | 0.019           | 4.75E-07       | TRUE                     | 2.72E-145    |
| rs72722045 | 15447_45   | Q00796  | SORD    | Irritable bowel syndrome               | 0.993 | 0.068  | 0.061 | 0.264 | 1.07 (0.95,1.21) | 0.019           | 1.90E-06       | TRUE                     | 1.13E-142    |
| rs72722045 | 15447_45   | Q00796  | SORD    | Cholecystitis                          | 0.983 | -0.042 | 0.087 | 0.629 | 0.96 (0.81,1.14) | 0.019           | 3.19E-07       | TRUE                     | 4.01E-145    |
| rs72722045 | 15447_45   | Q00796  | SORD    | Diverticular disease                   | 1.000 | -0.012 | 0.035 | 0.734 | 0.99 (0.92,1.06) | 0.019           | 1.84E-07       | TRUE                     | 4.03E-145    |
| rs212100   | 9829_91    | Q06520  | SULT2A1 | Gastric ulcer                          | 0.715 | -0.112 | 0.094 | 0.236 | 0.89 (0.74,1.08) | 0.011           | 2.04E-06       | TRUE                     | 1.54E-81     |
| rs212100   | 9829_91    | Q06520  | SULT2A1 | Cirrhosis                              | 0.873 | -0.136 | 0.113 | 0.232 | 0.87 (0.70,1.09) | 0.011           | 1.84E-06       | TRUE                     | 4.39E-82     |
| rs212100   | 9829_91    | Q06520  | SULT2A1 | Chronic gastritis (Atrophic gastritis) | 0.906 | -0.035 | 0.098 | 0.722 | 0.97 (0.80,1.17) | 0.011           | 1.79E-07       | TRUE                     | 3.62E-83     |
| rs212100   | 9829_91    | Q06520  | SULT2A1 | Gastroesophageal reflux disease        | 0.959 | -0.017 | 0.050 | 0.727 | 0.98 (0.89,1.08) | 0.011           | 1.66E-07       | TRUE                     | 2.62E-83     |
| rs212100   | 9829_91    | Q06520  | SULT2A1 | Acute gastritis                        | 0.981 | -0.004 | 0.157 | 0.981 | 1.00 (0.73,1.36) | 0.011           | 8.68E-10       | TRUE                     | 9.64E-84     |
| rs212100   | 9829_91    | Q06520  | SULT2A1 | Nonalcoholic fatty liver disease       | 0.981 | 0.079  | 0.149 | 0.597 | 1.08 (0.91,1.45) | 0.011           | 3.60E-07       | TRUE                     | 3.03E-83     |
| rs212100   | 9829_91    | Q06520  | SULT2A1 | Irritable bowel syndrome               | 0.993 | -0.021 | 0.079 | 0.793 | 0.98 (0.84,1.14) | 0.011           | 1.05E-07       | TRUE                     | 5.54E-83     |
| rs212100   | 9829_91    | Q06520  | SULT2A1 | Diverticular disease                   | 1.000 | -0.007 | 0.044 | 0.882 | 0.99 (0.91,1.08) | 0.011           | 3.16E-08       | TRUE                     | 1.80E-83     |
| rs59178722 | 3009_3     | Q03167  | TGFBR3  | Gastroesophageal reflux disease        | 0.643 | 0.121  | 0.084 | 0.152 | 1.13 (0.96,1.33) | 0.003           | 2.78E-06       | TRUE                     | 3.77E-24     |
| rs59178722 | 3009_3     | Q03167  | TGFBR3  | Cholelithiasis                         | 0.788 | 0.080  | 0.080 | 0.317 | 1.08 (0.93,1.27) | 0.003           | 1.30E-06       | TRUE                     | 1.21E-24     |
| rs59178722 | 3009_3     | Q03167  | TGFBR3  | Cirrhosis                              | 0.873 | 0.233  | 0.192 | 0.224 | 1.26 (0.87,1.84) | 0.003           | 1.89E-06       | TRUE                     | 1.84E-24     |
| rs59178722 | 3009_3     | Q03167  | TGFBR3  | Chronic gastritis (Atrophic gastritis) | 0.843 | 0.212  | 0.159 | 0.183 | 1.24 (0.90,1.69) | 0.003           | 2.50E-06       | TRUE                     | 3.43E-24     |
| rs59178722 | 3009_3     | Q03167  | TGFBR3  | Gastric ulcer                          | 0.849 | 0.114  | 0.161 | 0.479 | 1.12 (0.82,1.54) | 0.003           | 7.30E-07       | TRUE                     | 9.13E-25     |
| rs59178722 | 3009_3     | Q03167  | TGFBR3  | Diverticular disease                   | 0.939 | -0.066 | 0.077 | 0.388 | 0.94 (0.81,1.09) | 0.003           | 1.08E-06       | TRUE                     | 1.29E-24     |
| rs59178722 | 3009_3     | Q03167  | TGFBR3  | Acute gastritis                        | 0.964 | 0.191  | 0.267 | 0.474 | 1.21 (0.72,2.04) | 0.003           | 7.30E-07       | TRUE                     | 8.87E-25     |
| rs59178722 | 3009_3     | Q03167  | TGFBR3  | Nonalcoholic fatty liver disease       | 0.981 | 0.121  | 0.255 | 0.636 | 1.13 (0.89,1.46) | 0.003           | 2.89E-07       | TRUE                     | 3.74E-25     |
| rs59178722 | 3009_3     | Q03167  | TGFBR3  | Irritable bowel syndrome               | 0.993 | 0.129  | 0.134 | 0.338 | 1.14 (0.87,1.48) | 0.003           | 1.41E-06       | TRUE                     | 2.04E-24     |
| rs59178722 | 3009_3     | Q03167  | TGFBR3  | Cholecystitis                          | 0.983 | 0.042  | 0.190 | 0.824 | 1.04 (0.72,1.51) | 0.003           | 6.63E-08       | TRUE                     | 2.56E-25     |
| rs35894069 | 5939_42    | Q43508  | TNFSF12 | Gastroesophageal reflux disease        | 0.773 | -0.026 | 0.031 | 0.406 | 0.97 (0.92,1.04) | 0.025           | 9.35E-07       | TRUE                     | 5.00E-190    |
| rs35894069 | 5939_42    | Q43508  | TNFSF12 | Acute gastritis                        | 0.939 | -0.126 | 0.100 | 0.207 | 0.88 (0.73,1.07) | 0.025           | 2.27E-06       | TRUE                     | 2.06E-188    |
| rs35894069 | 5939_42    | Q43508  | TNFSF12 | Cholelithiasis                         | 0.884 | 0.014  | 0.030 | 0.649 | 1.01 (0.96,1.07) | 0.025           | 2.78E-07       | TRUE                     | 1.49E-191    |
| rs35894069 | 5939_42    | Q43508  | TNFSF12 | Chronic gastritis (Atrophic gastritis) | 0.887 | 0.025  | 0.062 | 0.889 | 1.03 (0.91,1.16) | 0.025           | 2.25E-07       | TRUE                     | 6.36E-191    |
| rs35894069 | 5939_42    | Q43508  | TNFSF12 | Gastric ulcer                          | 0.953 | -0.030 | 0.059 | 0.819 | 0.97 (0.86,1.09) | 0.025           | 3.60E-07       | TRUE                     | 1.94E-190    |
| rs35894069 | 5939_42    | Q43508  | TNFSF12 | Nonalcoholic fatty liver disease       | 0.981 | -0.016 | 0.094 | 0.866 | 0.98 (0.82,1.18) | 0.025           | 3.77E-08       | TRUE                     | 2.09E-192    |
| rs35894069 | 5939_42    | Q43508  | TNFSF12 | Irritable bowel syndrome               | 0.993 | 0.031  | 0.050 | 0.539 | 1.03 (0.93,1.14) | 0.025           | 5.81E-07       | TRUE                     | 1.84E-189    |
| rs35894069 | 5939_42    | Q43508  | TNFSF12 | Cholecystitis                          | 0.996 | 0.006  | 0.070 | 0.936 | 1.01 (0.88,1.15) | 0.025           | 8.51E-09       | TRUE                     | 4.40E-192    |
| rs35894069 | 5939_42    | Q43508  | TNFSF12 | Cirrhosis                              | 1.000 | -0.004 | 0.071 | 0.958 | 1.00 (0.87,1.15) | 0.025           | 3.85E-09       | TRUE                     | 9.84E-193    |
| rs4794183  | 3235_50    | Q8TEU8  | WFIKN2  | Gastroesophageal reflux disease        | 0.128 | 0.068  | 0.023 | 0.003 | 1.07 (1.02,1.12) | 0.025           | 1.20E-05       | TRUE                     | 3.43E-184    |
| rs4794183  | 3235_50    | Q8TEU8  | WFIKN2  | Cholecystitis                          | 0.717 | 0.077  | 0.051 | 0.133 | 1.08 (0.98,1.19) | 0.025           | 3.10E-06       | TRUE                     | 3.71E-188    |
| rs4794183  | 3235_50    | Q8TEU8  | WFIKN2  | Diverticular disease                   | 0.801 | 0.022  | 0.020 | 0.288 | 1.02 (0.98,1.06) | 0.025           | 1.62E-06       | TRUE                     | 7.29E-189    |
| rs4794183  | 3235_50    | Q8TEU8  | WFIKN2  | Chronic gastritis (Atrophic gastritis) | 0.843 | 0.065  | 0.044 | 0.139 | 1.07 (0.98,1.16) | 0.025           | 3.08E-06       | TRUE                     | 6.45E-188    |
| rs4794183  | 3235_50    | Q8TEU8  | WFIKN2  | Cholelithiasis                         | 0.918 | -0.006 | 0.021 | 0.784 | 0.99 (0.95,1.04) | 0.025           | 9.28E-08       | TRUE                     | 4.42E-192    |
| rs4794183  | 3235_50    | Q8TEU8  | WFIKN2  | Gastric ulcer                          | 0.967 | -0.008 | 0.043 | 0.846 | 0.99 (0.91,1.08) | 0.025           | 5.36E-08       | TRUE                     | 2.62E-191    |
| rs4794183  | 3235_50    | Q8TEU8  | WFIKN2  | Acute gastritis                        | 0.964 | 0.006  | 0.072 | 0.332 | 1.01 (0.87,1.16) | 0.025           | 1.02E-06       | TRUE                     | 1.01E-191    |
| rs4794183  | 3235_50    | Q8TEU8  | WFIKN2  | Nonalcoholic fatty liver disease       | 0.981 | 0.037  | 0.069 | 0.586 | 1.04 (0.91,1.19) | 0.025           | 3.80E-07       | TRUE                     | 2.09E-191    |
| rs4794183  | 3235_50    | Q8TEU8  | WFIKN2  | Irritable bowel syndrome               | 0.993 | 0.031  | 0.036 | 0.386 | 1.03 (0.96,1.11) | 0.025           | 1.16E-06       | TRUE                     | 9.98E-189    |
| rs4794183  | 3235_50    | Q8TEU8  | WFIKN2  | Cirrhosis                              | 1.000 | -0.016 | 0.052 | 0.764 | 0.98 (0.89,1.09) | 0.025           | 1.16E-07       | TRUE                     | 4.51E-192    |

\* False discovery rate (FDR) based on Benjamini-Hochberg approach and performed by each gastrointestinal outcomes.

**Table S7.** Association of putative type 2 diabetes-associated proteins in UKB-PPP with gastrointestinal diseases.

| Index SNP  | Gene    | UniProt | OID      | GI outcomes                      | b      | se    | pval     | OR (95% CI)      | snp_r2.exp | snp_r2.out | correct_ca | steiger_pval |
|------------|---------|---------|----------|----------------------------------|--------|-------|----------|------------------|------------|------------|------------|--------------|
| rs1614972  | ADH1B   | P00325  | OID30612 | Cirrhosis                        | 0.595  | 0.408 | 0.145    | 1.81 (0.82,4.03) | 0.001      | 2.71E-06   | TRUE       | 1.53E-07     |
| rs75045569 | EPHA1   | P21709  | OID20677 | Cholecystitis                    | 0.044  | 0.091 | 0.629    | 1.05 (0.87,1.25) | 0.014      | 3.20E-07   | TRUE       | 1.52E-159    |
| rs34356500 | GUSB    | P08236  | OID20296 | Nonalcoholic fatty liver disease | 0.742  | 0.189 | 8.61E-05 | 2.10 (1.45,3.04) | 0.006      | 1.98E-05   | TRUE       | 1.20E-57     |
| rs11809759 | INSL5   | Q9Y5Q6  | OID31448 | Gastric ulcer                    | -0.300 | 0.083 | 3.18E-04 | 0.74 (0.63,0.87) | 0.011      | 1.88E-05   | TRUE       | 2.39E-111    |
| rs3761077  | NCAN    | O14594  | OID21055 | Nonalcoholic fatty liver disease | -1.195 | 0.155 | 1.07E-14 | 0.30 (0.22,0.41) | 0.008      | 7.67E-05   | TRUE       | 5.77E-79     |
| rs3761077  | NCAN    | O14594  | OID21055 | Cirrhosis                        | -0.737 | 0.121 | 1.09E-09 | 0.48 (0.38,0.61) | 0.008      | 4.76E-05   | TRUE       | 1.93E-82     |
| rs212100   | SULT2A1 | Q06520  | OID20508 | Cholelithiasis                   | 0.383  | 0.027 | 1.28E-45 | 1.47 (1.39,1.55) | 0.017      | 0.000262   | TRUE       | 9.48E-145    |
| rs212100   | SULT2A1 | Q06520  | OID20508 | Cholecystitis                    | 0.209  | 0.062 | 8.03E-04 | 1.23 (1.09,1.39) | 0.017      | 1.54E-05   | TRUE       | 1.78E-176    |
| rs4968200  | TNFSF12 | O43508  | OID20624 | Diverticular disease             | 0.140  | 0.032 | 1.08E-05 | 1.15 (1.08,1.22) | 0.017      | 2.78E-05   | TRUE       | 3.65E-172    |

CI, confidence interval; GI, gastrointestinal; OR, odd ratio.

**Table S8.** Association of putative type 2 diabetes-associated proteins in Fenland with gastrointestinal diseases.

| Index SNP  | SomaLogic Gene | Protein | Description | GI outcomes                                        | b                                | se     | pval  | OR (95% CI)               | snp_r2.exp | snp_r2.out | correct | ca | steiger_pval |
|------------|----------------|---------|-------------|----------------------------------------------------|----------------------------------|--------|-------|---------------------------|------------|------------|---------|----|--------------|
| rs1229984  | 9834-62        | ADH1B   | ADH1B       | Alcohol dehydrogenase 1B                           | Cirrhosis                        | 1.249  | 0.319 | 8.96E-05 3.49 (1.87,6.51) | 0.004      | 1.97E-05   | TRUE    |    | 3.20E-10     |
| rs1800759  | 8325-37        | ADH4    | ADH4        | Alcohol dehydrogenase 4                            | Cholelithiasis                   | 0.183  | 0.069 | 8.54E-03 1.20 (1.05,1.38) | 0.006      | 8.85E-06   | TRUE    |    | 4.89E-15     |
| rs41277428 | 3431-54        | EPHA1   | EphA1       | Ephrin type-A receptor 1                           | Cholecystitis                    | -0.015 | 0.024 | 0.542 0.99 (0.94,1.03)    | 0.082      | 5.11E-07   | TRUE    |    | 1.11E-199    |
| rs9530     | 15562-24       | GUSB    | BGLR        | Beta-glucuronidase                                 | Nonalcoholic fatty liver disease | 0.582  | 0.159 | 2.51E-04 1.79 (1.31,2.44) | 0.013      | 1.72E-05   | TRUE    |    | 2.01E-29     |
| rs11809759 | 10462-14       | INSL5   | INSL5       | Insulin-like peptide INSL5                         | Gastric ulcer                    | -0.507 | 0.141 | 3.18E-04 0.60 (0.46,0.79) | 0.005      | 1.88E-05   | TRUE    |    | 1.23E-12     |
| rs2228603  | 15573-110      | NCAN    | CSPG3       | Neurocan core protein                              | Nonalcoholic fatty liver disease | -1.268 | 0.144 | 1.34E-18 0.28 (0.21,0.37) | 0.014      | 9.93E-05   | TRUE    |    | 3.02E-29     |
| rs2228603  | 15573-110      | NCAN    | CSPG3       | Neurocan core protein                              | Cirrhosis                        | -0.725 | 0.114 | 1.85E-10 0.48 (0.39,0.61) | 0.014      | 5.21E-05   | TRUE    |    | 1.20E-30     |
| rs10426201 | 9829-91        | SULT2A1 | SULT 2A1    | Bile salt sulfotransferase                         | Cholelithiasis                   | 0.497  | 0.039 | 1.28E-36 1.64 (1.52,1.77) | 0.018      | 0.000208   | TRUE    |    | 8.19E-36     |
| rs10426201 | 9829-91        | SULT2A1 | SULT 2A1    | Bile salt sulfotransferase                         | Cholecystitis                    | 0.302  | 0.092 | 1.03E-03 1.35 (1.13,1.62) | 0.018      | 1.48E-05   | TRUE    |    | 5.68E-42     |
| rs62061198 | 5939-42        | TNFSF12 | TWEAK       | Tumor necrosis factor ligand superfamily member 12 | Diverticular disease             | 0.046  | 0.018 | 8.55E-03 1.05 (1.01,1.08) | 0.082      | 1.00E-05   | TRUE    |    | 2.99E-196    |

CI, confidence interval; GI, gastrointestinal; OR, odd ratio.

**Table S9.** Colocalization analysis of identified protein-gastrointestinal pairs in deCODE, UKB-PPP, and Fenland.

|          |           |         |         |                                  | window ± 500kb |           |               |           |           |              | window ± 1000kb |           |               |           |           |              |
|----------|-----------|---------|---------|----------------------------------|----------------|-----------|---------------|-----------|-----------|--------------|-----------------|-----------|---------------|-----------|-----------|--------------|
| Database | SomaLogic | Gene    | UniProt | GI outcomes                      | nsnps          | PP.H0.abf | PP.H1.abf     | PP.H2.abf | PP.H3.abf | PP.H4.abf    | nsnps           | PP.H0.abf | PP.H1.abf     | PP.H2.abf | PP.H3.abf | PP.H4.abf    |
| deCODE   | 9834_62   | ADH1B   | P00325  | Cirrhosis                        | 5991           | 7.42E-07  | 1.19E-06      | 3.29E-02  | 0.052     | <b>0.915</b> | 11147           | 6.53E-07  | 1.11E-06      | 0.026     | 0.043     | <b>0.931</b> |
| deCODE   | 8325_37   | ADH4    | P08319  | Cholelithiasis                   | 5983           | 8.85E-34  | 3.70E-34      | 4.25E-01  | 0.177     | 0.397        | 11068           | 9.64E-34  | 5.03E-34      | 0.419     | 0.218     | 0.363        |
| deCODE   | 4435_66   | ENPP7   | Q6UWV6  | Cholelithiasis                   | 6793           | 0         | 0             | 2.20E-03  | 0.981     | 0.017        | 12899           | 0         | 0             | 0.003     | 0.969     | 0.028        |
| deCODE   | 3431_54   | EPHA1   | P21709  | Cholecystitis                    | 3167           | 0         | 0             | 0.777     | 0.207     | 0.016        | 6699            | 0         | 0             | 0.670     | 0.317     | 0.013        |
| deCODE   | 15562_24  | GUSB    | P08236  | Nonalcoholic fatty liver disease | 5782           | 3.08E-104 | 1.47E-103     | 1.71E-01  | 0.813     | 0.017        | 11340           | 3.38E-104 | 1.78E-103     | 0.157     | 0.826     | 0.017        |
| deCODE   | 10462_14  | INSL5   | Q9Y5Q6  | Gastric ulcer                    | 5033           | 1.46E-07  | 5.90E-08      | 1.69E-01  | 0.068     | 0.763        | 10053           | 1.12E-07  | 8.46E-08      | 0.129     | 0.097     | 0.774        |
| deCODE   | 15573_110 | NCAN    | O14594  | Cirrhosis                        | 4665           | 3.66E-100 | 1.19E-86      | 3.07E-14  | 1.000     | 1.93E-07     | 10375           | 3.55E-100 | 1.25E-86      | 2.83E-14  | 1.000     | 1.91E-07     |
| deCODE   | 15573_110 | NCAN    | O14594  | Nonalcoholic fatty liver disease | 4665           | 3.60E-103 | 1.18E-86      | 3.02E-17  | 0.992     | 0.008        | 10374           | 4.60E-103 | 1.24E-86      | 3.67E-17  | 0.991     | 0.009        |
| deCODE   | 9829_91   | SULT2A1 | Q06520  | Cholecystitis                    | 6065           | 4.03E-82  | 2.17E-82      | 2.39E-01  | 0.128     | 0.633        | 10900           | 3.81E-82  | 3.75E-82      | 0.207     | 0.203     | 0.589        |
| deCODE   | 9829_91   | SULT2A1 | Q06520  | Cholelithiasis                   | 6067           | 1.30E-122 | 1.16E-83      | 7.71E-42  | 0.006     | <b>0.994</b> | 10903           | 6.06E-123 | 8.80E-84      | 3.29E-42  | 0.004     | <b>0.996</b> |
| deCODE   | 5939_42   | TNFSF12 | O43508  | Diverticular disease             | 5059           | 0         | 0             | 2.96E-03  | 0.997     | 0.001        | 10354           | 0         | 0             | 0.004     | 0.996     | 0.001        |
| Database | OID       | Gene    | UniProt | Outcomes                         | nsnps          | PP.H0.abf | PP.H1.abf     | PP.H2.abf | PP.H3.abf | PP.H4.abf    | nsnps           | PP.H0.abf | PP.H1.abf     | PP.H2.abf | PP.H3.abf | PP.H4.abf    |
| UKB-PPP  | OID30612  | ADH1B   | P00325  | Cirrhosis                        | 4098           | 1.43E-33  | 1.77E-33      | 0.359319  | 0.446     | 0.195        | 8694            | 1.32E-33  | 1.97E-33      | 0.328     | 0.491     | 0.181        |
| UKB-PPP  | OID20677  | EPHA1   | P21709  | Cholecystitis                    | 2621           | 3.05E-165 | 6.35E-166     | 0.818744  | 0.171     | 0.011        | 4374            | 2.79E-165 | 9.05E-166     | 0.748     | 0.243     | 0.009        |
| UKB-PPP  | OID20296  | GUSB    | P08236  | Nonalcoholic fatty liver disease | 4968           | 3.76E-64  | 1.87E-63      | 4.37E-02  | 0.216     | 0.740        | 8665            | 3.68E-64  | 2.02E-63      | 0.043     | 0.234     | 0.723        |
| UKB-PPP  | OID31448  | INSL5   | Q9Y5Q6  | Gastric ulcer                    | 3783           | 3.46E-124 | 8.02E-125     | 0.170214  | 0.039     | 0.791        | 8647            | 2.65E-124 | 1.43E-124     | 0.130     | 0.069     | 0.800        |
| UKB-PPP  | OID21055  | NCAN    | O14594  | Cirrhosis                        | 3957           | 7.06E-109 | 2.30E-95      | 3.07E-14  | 1.000     | 4.78E-08     | 7922            | 6.27E-109 | 2.30E-95      | 0.000     | 1.000     | 4.25E-08     |
| UKB-PPP  | OID21055  | NCAN    | O14594  | Nonalcoholic fatty liver disease | 3957           | 6.78E-112 | 2.29E-95      | 2.95E-17  | 0.999     | 0.001        | 7922            | 7.96E-112 | 2.30E-95      | 0.000     | 0.999     | 0.001        |
| UKB-PPP  | OID20508  | SULT2A1 | Q06520  | Cholecystitis                    | 5172           | 1.58E-300 | 7.33E-301     | 0.206033  | 0.095     | 0.699        | 8618            | 1.46E-300 | 1.31E-300     | 0.190     | 0.171     | 0.638        |
| UKB-PPP  | OID20508  | SULT2A1 | Q06520  | Cholelithiasis                   | 5172           | 0.00E+00  | 2.94E-302     | 4.30E-42  | 0.003     | <b>0.997</b> | 8618            | 0         | 2.30E-302     | 0         | 0.002     | <b>0.998</b> |
| UKB-PPP  | OID20624  | TNFSF12 | O43508  | Diverticular disease             | 4512           | 0.00E+00  | 0.00E+00      | 2.80E-03  | 0.997     | 4.85E-04     | 8024            | 0         | 0.E+00        | 0.003     | 0.996     | 0.001        |
| Database | SomaLogic | Gene    | UniProt | Outcomes                         | nsnps          | PP.H0.abf | PP.H1.abf     | PP.H2.abf | PP.H3.abf | PP.H4.abf    | nsnps           | PP.H0.abf | PP.H1.abf     | PP.H2.abf | PP.H3.abf | PP.H4.abf    |
| Fenland  | 9834_62   | ADH1B   | P00325  | Cirrhosis                        | 3772           | 4.97E-07  | 6.22E-07      | 2.92E-02  | 0.036     | <b>0.935</b> | 6433            | 4.94E-07  | 6.62E-07      | 0.029     | 0.038     | <b>0.933</b> |
| Fenland  | 8325-37   | ADH4    | P08319  | Cholelithiasis                   | 3764           | 1.81E-10  | 3.95E-11      | 0.730824  | 0.159     | 0.110        | 6082            | 1.76E-10  | 4.47E-11      | 0.713     | 0.180     | 0.107        |
| Fenland  | 3431-54   | EPHA1   | P21709  | Cholecystitis                    | 1612           | 0         | 0             | 0.887437  | 0.095     | 0.017        | 3888            | 0         | 0             | 0.818     | 0.166     | 0.016        |
| Fenland  | 15562_24  | GUSB    | P08236  | Nonalcoholic fatty liver disease | 1874           | 1.53E-26  | 2.26E-26      | 9.09E-02  | 0.134     | 0.775        | 4645            | 1.11E-26  | 6.44E-26      | 0.064     | 0.373     | 0.562        |
| Fenland  | 10462-14  | INSL5   | Q9Y5Q6  | Gastric ulcer                    | 3160           | 2.06E-09  | 5.54E-10      | 0.135     | 0.036     | 0.829        | 5793            | 2.03E-09  | 7.60E-10      | 0.134     | 0.049     | 0.817        |
| Fenland  | 15573-110 | NCAN    | O14594  | Cirrhosis                        | 2333           | 1.24E-41  | 4.54E-28      | 2.73E-14  | 1.000     | 1.77E-07     | 5412            | 1.24E-41  | 4.55E-28      | 2.73E-14  | 1.000     | 1.77E-07     |
| Fenland  | 15573-110 | NCAN    | O14594  | Nonalcoholic fatty liver disease | 2333           | 1.56E-44  | 4.50E-28      | 3.44E-17  | 0.992     | 0.008        | 5412            | 1.56E-44  | 4.52E-28      | 3.44E-17  | 0.992     | 0.008        |
| Fenland  | 9829-91   | SULT2A1 | Q06520  | Cholecystitis                    | 3701           | 1.58E-39  | 4.61E-40      | 0.277111  | 0.080     | 0.643        | 6158            | 1.45E-39  | 8.79E-40      | 0.254     | 0.153     | 0.593        |
| Fenland  | 9829_91   | SULT2A1 | Q06520  | Cholelithiasis                   | 3701           | 1.45E-79  | 2.30E-40      | 2.54E-41  | 0.039     | <b>0.961</b> | 6158            | 1.44E-79  | 2.28E-40      | 2.52E-41  | 0.039     | <b>0.961</b> |
| Fenland  | 5939_42   | TNFSF12 | O43508  | Diverticular disease             | 2727           | 0         | 4.9406564E-03 | 3.31E-03  | 0.996     | 3.88E-04     | 5816            | 0         | 4.9406564E-03 | 0.003     | 0.996     | 3.88E-04     |



Table S10. Mediation analysis of identified protein between type 2 diabetes and gastrointestinal diseases in deCODE, UKB-PPP, and Fenland.

| Database | Index SNP  | SomaLogic | UniProt | Gene    | Outcomes                         | b (T2D-GI) | se (T2D-GI) | pval (T2D-GI) | b (T2D-protein) | se (T2D-protein) | pval (T2D-protein) | b (protein-GI) | se (protein-GI) | pval (protein-GI) | Mediation * | b_mediation | se_mediation | p_mediation | Proportion mediation estimate | se_proportion mediation | Mediation proportion (95% CI) |
|----------|------------|-----------|---------|---------|----------------------------------|------------|-------------|---------------|-----------------|------------------|--------------------|----------------|-----------------|-------------------|-------------|-------------|--------------|-------------|-------------------------------|-------------------------|-------------------------------|
| deCODE   | rs1229984  | 9834_62   | P00325  | ADH1B   | Cirrhosis                        | 0.111      | 0.046       | 0.015         | 0.067           | 0.014            | 9.32E-07           | 0.719          | 0.183           | 8.96E-05          | Yes         | 0.048       | 0.016        | 0.002       | 0.429                         | 0.140                   | 0.140 (0.43,0.70,36)          |
| deCODE   | rs2602844  | 8325_37   | P08319  | ADH4    | Cholelithiasis                   | 0.077      | 0.021       | 3.12E-04      | 0.122           | 0.015            | 1.36E-15           | 0.229          | 0.067           | 0.001             | Yes         | 0.028       | 0.009        | 0.002       | 0.362                         | 0.115                   | 0.115 (0.36,0.58,76)          |
| deCODE   | rs35246623 | 4435_66   | Q6UWV6  | ENPP7   | Cholelithiasis                   | 0.077      | 0.021       | 3.12E-04      | 0.077           | 0.013            | 2.18E-09           | 0.038          | 0.011           | 4.19E-04          | Yes         | 0.003       | 0.001        | 0.003       | 0.038                         | 0.013                   | 0.013 (0.37,0.62,27)          |
| deCODE   | rs10952549 | 3431_54   | P21709  | EPHA1   | Cholecystitis                    | 0.099      | 0.029       | 0.001         | 0.051           | 0.013            | 7.01E-05           | -0.140         | 0.043           | 0.001             | No          | NA          | NA           | NA          | NA                            | NA                      | NA                            |
| deCODE   | rs34356500 | 15562_24  | P08236  | GUSB    | Nonalcoholic fatty liver disease | 0.307      | 0.060       | 2.94E-07      | 0.121           | 0.018            | 6.46E-12           | 0.654          | 0.167           | 8.61E-05          | Yes         | 0.079       | 0.023        | 0.001       | 0.256                         | 0.075                   | 0.075 (0.87,40.42)            |
| deCODE   | rs11809759 | 10462_14  | Q9Y5Q6  | INSL5   | Gastric ulcer                    | 0.096      | 0.021       | 5.37E-06      | 0.038           | 0.012            | 0.001              | -0.941         | 0.261           | 3.18E-04          | No          | NA          | NA           | NA          | NA                            | NA                      | NA                            |
| deCODE   | rs2228603  | 15573_110 | O14594  | NCAN    | Cirrhosis                        | 0.111      | 0.046       | 0.015         | -0.057          | 0.017            | 0.001              | -0.625         | 0.098           | 1.85E-10          | Yes         | 0.035       | 0.012        | 0.003       | 0.318                         | 0.109                   | 0.109 (0.50,53.05)            |
| deCODE   | rs2228603  | 15573_110 | O14594  | NCAN    | Nonalcoholic fatty liver disease | 0.307      | 0.060       | 2.94E-07      | -0.057          | 0.017            | 0.001              | -1.092         | 0.124           | 1.34E-18          | Yes         | 0.062       | 0.020        | 0.002       | 0.201                         | 0.065                   | 0.065 (0.20,32.91)            |
| deCODE   | rs212100   | 9829_91   | Q06520  | SULT2A1 | Cholecystitis                    | 0.099      | 0.029       | 0.001         | 0.082           | 0.014            | 1.43E-08           | 0.374          | 0.111           | 0.001             | Yes         | 0.031       | 0.011        | 0.004       | 0.309                         | 0.107                   | 0.107 (0.99,51.83)            |
| deCODE   | rs212100   | 9829_91   | Q06520  | SULT2A1 | Cholelithiasis                   | 0.077      | 0.021       | 3.12E-04      | 0.082           | 0.014            | 1.43E-08           | 0.683          | 0.048           | 1.28E-45          | Yes         | 0.056       | 0.011        | 1.39E-07    | 0.728                         | 0.138                   | 0.138 (0.45,70.99,88)         |
| deCODE   | rs35894069 | 5939_42   | O43508  | TNFSF12 | Diverticular disease             | 0.034      | 0.016       | 0.035         | -0.047          | 0.013            | 3.57E-04           | 0.102          | 0.028           | 2.78E-04          | No          | NA          | NA           | NA          | NA                            | NA                      | NA                            |
| UKB-PPP  | rs1614972  | OID30612  | P00325  | ADH1B   | Cirrhosis                        | 0.111      | 0.046       | 0.015         | 0.093           | 0.017            | 1.02E-07           | 0.595          | 0.408           | 0.145             | Yes         | 0.055       | 0.039        | 0.159       | 0.496                         | 0.353                   | 0.353 (0.118,75)              |
| UKB-PPP  | rs75045569 | OID20677  | P21709  | EPHA1   | Cholecystitis                    | 0.099      | 0.029       | 0.001         | 0.032           | 0.015            | 0.028              | 0.044          | 0.091           | 0.029             | Yes         | 0.001       | 0.003        | 0.637       | 0.014                         | 0.031                   | 0.031 (0.44)                  |
| UKB-PPP  | rs34356500 | OID20296  | P08236  | GUSB    | Nonalcoholic fatty liver disease | 0.307      | 0.060       | 2.94E-07      | 0.092           | 0.021            | 1.59E-05           | 0.742          | 0.189           | 8.61E-05          | Yes         | 0.068       | 0.023        | 0.004       | 0.221                         | 0.076                   | 0.076 (0.21,37.04)            |
| UKB-PPP  | rs11809759 | OID31448  | Q9Y5Q6  | INSL5   | Gastric ulcer                    | 0.096      | 0.021       | 5.37E-06      | 0.073           | 0.018            | 6.11E-05           | -0.300         | 0.083           | 3.18E-04          | No          | NA          | NA           | NA          | NA                            | NA                      | NA                            |
| UKB-PPP  | rs3761077  | OID21055  | O14594  | NCAN    | Cirrhosis                        | 0.111      | 0.046       | 0.015         | -0.090          | 0.021            | 2.88E-05           | -0.737         | 0.121           | 1.09E-09          | Yes         | 0.066       | 0.019        | 0.001       | 0.594                         | 0.172                   | 0.172 (0.53,93.12)            |
| UKB-PPP  | rs3761077  | OID21055  | O14594  | NCAN    | Nonalcoholic fatty liver disease | 0.307      | 0.060       | 2.94E-07      | -0.090          | 0.021            | 2.88E-05           | -1.195         | 0.155           | 1.07E-14          | Yes         | 0.107       | 0.029        | 2.34E-04    | 0.349                         | 0.095                   | 0.095 (0.31,53.50)            |
| UKB-PPP  | rs212100   | OID20508  | Q06520  | SULT2A1 | Cholecystitis                    | 0.099      | 0.029       | 0.001         | 0.067           | 0.015            | 1.20E-05           | 0.209          | 0.062           | 0.001             | Yes         | 0.014       | 0.005        | 0.008       | 0.141                         | 0.053                   | 0.053 (0.72,24.49)            |
| UKB-PPP  | rs212100   | OID20508  | Q06520  | SULT2A1 | Cholelithiasis                   | 0.077      | 0.021       | 3.12E-04      | 0.067           | 0.015            | 1.20E-05           | 0.383          | 0.027           | 1.28E-45          | Yes         | 0.026       | 0.006        | 2.89E-05    | 0.332                         | 0.079                   | 0.079 (0.66,48.82)            |
| UKB-PPP  | rs4968200  | OID20624  | O43508  | TNFSF12 | Diverticular disease             | 0.034      | 0.016       | 0.035         | -0.068          | 0.017            | 7.11E-05           | 0.140          | 0.032           | 1.08E-05          | No          | NA          | NA           | NA          | NA                            | NA                      | NA                            |
| Fenland  | rs1229984  | 9834_62   | P00325  | ADH1B   | Cirrhosis                        | 0.111      | 0.046       | 0.015         | 0.041           | 0.019            | 0.027              | 1.249          | 0.319           | 8.96E-05          | Yes         | 0.051       | 0.027        | 0.054       | 0.459                         | 0.238                   | 0.238 (0.92,64)               |
| Fenland  | rs1800759  | 8325_37   | P08319  | ADH4    | Cholelithiasis                   | 0.077      | 0.021       | 3.12E-04      | 0.099           | 0.022            | 6.89E-06           | 0.183          | 0.069           | 0.009             | Yes         | 0.018       | 0.008        | 0.023       | 0.234                         | 0.103                   | 0.103 (0.20,43.61)            |
| Fenland  | rs41277428 | 3431_54   | P21709  | EPHA1   | Cholecystitis                    | 0.099      | 0.029       | 0.001         | 0.040           | 0.019            | 0.029              | -0.015         | 0.024           | 0.542             | No          | NA          | NA           | NA          | NA                            | NA                      | NA                            |
| Fenland  | rs9530     | 15562_24  | P08236  | GUSB    | Nonalcoholic fatty liver disease | 0.307      | 0.060       | 2.94E-07      | 0.107           | 0.023            | 5.39E-06           | 0.652          | 0.159           | 2.51E-04          | Yes         | 0.062       | 0.022        | 0.004       | 0.202                         | 0.071                   | 0.071 (0.31,34.06)            |
| Fenland  | rs11809759 | 10462_14  | Q9Y5Q6  | INSL5   | Gastric ulcer                    | 0.096      | 0.021       | 5.37E-06      | 0.053           | 0.019            | 0.007              | -0.507         | 0.141           | 3.18E-04          | No          | NA          | NA           | NA          | NA                            | NA                      | NA                            |
| Fenland  | rs2228603  | 15573_110 | O14594  | NCAN    | Cirrhosis                        | 0.111      | 0.046       | 0.015         | -0.056          | 0.024            | 0.017              | -0.725         | 0.114           | 1.85E-10          | Yes         | 0.041       | 0.018        | 0.026       | 0.367                         | 0.165                   | 0.165 (0.41,69.03)            |
| Fenland  | rs2228603  | 15573_110 | O14594  | NCAN    | Nonalcoholic fatty liver disease | 0.307      | 0.060       | 2.94E-07      | -0.056          | 0.024            | 0.017              | -1.268         | 0.144           | 1.34E-18          | Yes         | 0.072       | 0.031        | 0.022       | 0.233                         | 0.101                   | 0.101 (0.23,28.34,0.43,16)    |
| Fenland  | rs10426201 | 9829_91   | Q06520  | SULT2A1 | Cholecystitis                    | 0.099      | 0.029       | 0.001         | 0.055           | 0.021            | 0.009              | 0.302          | 0.092           | 0.001             | Yes         | 0.017       | 0.008        | 0.041       | 0.168                         | 0.082                   | 0.082 (0.71,32.86)            |
| Fenland  | rs10426201 | 9829_91   | Q06520  | SULT2A1 | Cholelithiasis                   | 0.077      | 0.021       | 3.12E-04      | 0.055           | 0.021            | 0.009              | 0.497          | 0.039           | 1.28E-36          | Yes         | 0.027       | 0.011        | 0.010       | 0.356                         | 0.139                   | 0.139 (0.64,0.62,86)          |
| Fenland  | rs62061198 | 5939_42   | O43508  | TNFSF12 | Diverticular disease             | 0.034      | 0.016       | 0.035         | -0.057          | 0.021            | 0.008              | 0.046          | 0.018           | 0.009             | No          | NA          | NA           | NA          | NA                            | NA                      | NA                            |

\* Mediation effect exist or not, se, standard error

Table S11. Appraisal of druggability.

| Uniport                                      | Gene                                      | Target name                                                      | Pipeline                         | Drug name                                                                                                                                   | Indication/associated conditions                                                                                                                                                                                                                 |
|----------------------------------------------|-------------------------------------------|------------------------------------------------------------------|----------------------------------|---------------------------------------------------------------------------------------------------------------------------------------------|--------------------------------------------------------------------------------------------------------------------------------------------------------------------------------------------------------------------------------------------------|
| Q06520                                       | SULT2A1                                   | Bile salt sulfotransferase                                       | Approved                         | Abiraterone*                                                                                                                                | An antiandrogen used in the treatment of metastatic castration-resistant prostate cancer and metastatic high-risk castration-sensitive prostate cancer.                                                                                          |
|                                              |                                           |                                                                  |                                  | Tamoxifen*                                                                                                                                  | A selective estrogen receptor modulator used to treat estrogen receptor positive breast cancer, reduce the risk of invasive breast cancer following surgery, or reduce the risk of breast cancer in high-risk women.                             |
|                                              |                                           |                                                                  |                                  | Prasterone*                                                                                                                                 | A steroid formulated as a vaginal insert indicated for the treatment of moderate to severe dyspareunia associated with menopausal vulvar and vaginal atrophy.                                                                                    |
|                                              |                                           |                                                                  |                                  | Palbociclib*                                                                                                                                | An endocrine-based chemotherapeutic agent used in combination with other antineoplastic agents to treat HER2-negative and HR-positive advanced or metastatic breast cancer.                                                                      |
|                                              |                                           |                                                                  | In clinical trials               | Dehydroepiandrosterone (Launched) †                                                                                                         | Menopause                                                                                                                                                                                                                                        |
|                                              |                                           |                                                                  |                                  | Adenosine 3',5'-diphosphate* †                                                                                                              | NA                                                                                                                                                                                                                                               |
|                                              |                                           |                                                                  |                                  | Aetiocolanalone*                                                                                                                            | NA                                                                                                                                                                                                                                               |
|                                              |                                           |                                                                  |                                  | Mercuric iodide*                                                                                                                            | NA                                                                                                                                                                                                                                               |
| Preclinical                                  | Bentflurain (Phase 3) †                   | NA                                                               |                                  |                                                                                                                                             |                                                                                                                                                                                                                                                  |
|                                              | 3-alpha-hydroxy-5-beta-androstan-17-one † | NA                                                               |                                  |                                                                                                                                             |                                                                                                                                                                                                                                                  |
|                                              |                                           |                                                                  | Propacetamol*                    | A paracetamol prodrug of intravenous administration used to control fever and pain of perioperative period in multimodal analgesia therapy. |                                                                                                                                                                                                                                                  |
| P00325                                       | ADH1B                                     | Alcohol dehydrogenase 1B                                         | Approved                         | NADH*                                                                                                                                       | Some evidence suggests that NADH might be useful in treating Parkinson's disease, chronic fatigue syndrome, Alzheimer's disease and cardiovascular disease.                                                                                      |
|                                              |                                           |                                                                  |                                  | Fomepizole*                                                                                                                                 | An antidote for ethylene glycol (such as antifreeze) or methanol poisoning, or for use in suspected ethylene glycol or methanol ingestion, either alone or in combination with hemodialysis                                                      |
|                                              |                                           |                                                                  |                                  | Glycerin*                                                                                                                                   | A solvent, emollient, pharmaceutical agent, and sweetening agent.                                                                                                                                                                                |
|                                              |                                           |                                                                  | In clinical trials               | Ethanol*                                                                                                                                    | For therapeutic neurolysis of nerves or ganglia for the relief of intractable chronic pain in such conditions as inoperable cancer and trigeminal neuralgia (tic douloureux), in patients for whom neurosurgical procedures are contraindicated. |
|                                              |                                           |                                                                  |                                  | N-Benzylformamide*                                                                                                                          | NA                                                                                                                                                                                                                                               |
|                                              |                                           |                                                                  |                                  | 4-Iodopyrazole*                                                                                                                             | NA                                                                                                                                                                                                                                               |
|                                              |                                           |                                                                  |                                  | Cyclohexanol*                                                                                                                               | NA                                                                                                                                                                                                                                               |
|                                              |                                           |                                                                  |                                  | N-Heptylformamide*                                                                                                                          | NA                                                                                                                                                                                                                                               |
| Nicotinamide adenine dinucleotide phosphate* | NA                                        |                                                                  |                                  |                                                                                                                                             |                                                                                                                                                                                                                                                  |
| Coenzyme-I (Phase 2) †                       | NA                                        |                                                                  |                                  |                                                                                                                                             |                                                                                                                                                                                                                                                  |
| P08319                                       | ADH4                                      | Alcohol dehydrogenase 4                                          | Approved                         | NADH*                                                                                                                                       | Some evidence suggests that NADH might be useful in treating Parkinson's disease, chronic fatigue syndrome, Alzheimer's disease and cardiovascular disease.                                                                                      |
|                                              |                                           |                                                                  |                                  | Ethanol*                                                                                                                                    | For therapeutic neurolysis of nerves or ganglia for the relief of intractable chronic pain in such conditions as inoperable cancer and trigeminal neuralgia (tic douloureux), in patients for whom neurosurgical procedures are contraindicated. |
|                                              |                                           |                                                                  | In clinical trials               | Cyclohexylformamide*                                                                                                                        | NA                                                                                                                                                                                                                                               |
|                                              |                                           |                                                                  | Coenzyme-I (Phase 2) †           | NA                                                                                                                                          |                                                                                                                                                                                                                                                  |
| Q6UWV6                                       | ENPP7                                     | Ectonucleotide pyrophosphatase/phosphodiesterase family member 7 | Druggable §                      | NA                                                                                                                                          | NA                                                                                                                                                                                                                                               |
| P21709                                       | EPHA1                                     | Ephrin type-A receptor 1                                         | Approved                         | Fostamatinib*<br>Vandetanib †                                                                                                               | Fostamatinib is a spleen tyrosine kinase inhibitor used to treat chronic immune thrombocytopenia after attempting one other treatment.<br>Medullary thyroid cancer (MTC)                                                                         |
| Q9Y5Q6                                       | INSL5                                     | Insulin-like peptide INSL5                                       | Not listed as druggable target § | NA                                                                                                                                          | NA                                                                                                                                                                                                                                               |
| O14594                                       | NCAN                                      | Neurocan core protein                                            | Approved                         | Hyaluronic-acid †                                                                                                                           | Osteoarthritis, interstitial cystitis (IC)                                                                                                                                                                                                       |
| P08236                                       | GUSB                                      | Beta-glucuronidase                                               | Approved                         | Chondroitin sulfate*<br>Tyropanoic acid *                                                                                                   | Symptomatic treatment of Arthritis, backache, muscle pain, muscle ache.<br>For use in cholecystography (X-ray diagnosis/imaging of gallstones).                                                                                                  |
| O43508                                       | TNFSF12                                   | Tumor necrosis factor ligand superfamily member 12               | In clinical trials               | RO-5458640 (Phase 1) †<br>BLIB-023 (Phase 2) †                                                                                              | Neoplasms<br>Lupus Nephritis; Arthritis, Rheumatoid                                                                                                                                                                                              |

\* Identified in DrugBank

† Identified in ChEMBL databases

‡ Identified in Connectivity Map

§ Identified in Dependency Map

NA, not available
